# Supplementary material for: Identification of Genetic Signature Associated With Aging in Pulmonary Fibrosis
Source: Front Med (Lausanne). 2021 Oct 20;8:744239. doi: 10.3389/fmed.2021.744239 (PMC8564051; doi:10.3389/fmed.2021.744239)
Supplement: Supplementary file 5 [file Data_Sheet_1.xlsx]

## Sheet: Sample
Sample	Group	Sex	Age	Age_Group
GSM1149994	IPF	Male	48	Young
GSM1150018	IPF	Male	37	Young
GSM1150256	IPF	Male	45	Young
GSM1150277	IPF	Male	40	Young
GSM533888	IPF	Male	37	Young
GSM1150183	IPF	Female	43	Young
GSM1150280	IPF	Female	49	Young
GSM1150286	IPF	Female	45	Young
GSM1150390	IPF	Female	45	Young
GSM533889	IPF	Female	45	Young
GSM1149950	IPF	Male	54	Young
GSM1149985	IPF	Male	54	Young
GSM1150056	IPF	Male	53	Young
GSM1150197	IPF	Male	54	Young
GSM1150306	IPF	Male	53	Young
GSM1150367	IPF	Male	52	Young
GSM595424	IPF	Male	54	Young
GSM1150125	IPF	Female	50	Young
GSM1150421	IPF	Female	50	Young
GSM1149984	IPF	Male	73	Old
GSM1150054	IPF	Male	71	Old
GSM1150058	IPF	Male	71	Old
GSM1150068	IPF	Male	72	Old
GSM1150076	IPF	Male	76	Old
GSM1150106	IPF	Male	73	Old
GSM1150111	IPF	Male	72	Old
GSM1150067	IPF	Male	70	Old
GSM1150089	IPF	Male	72	Old
GSM1150208	IPF	Male	72	Old
GSM1150247	IPF	Male	71	Old
GSM1150385	IPF	Male	79	Old
GSM1150395	IPF	Male	71	Old
GSM1150399	IPF	Male	77	Old
GSM1150404	IPF	Male	70	Old
GSM1150412	IPF	Male	72	Old
GSM1150416	IPF	Male	79	Old
GSM595423	IPF	Male	70	Old
GSM2700625	IPF	Male	78	Old
GSM2700627	IPF	Male	76	Old
GSM2700629	IPF	Male	73	Old
GSM1149977	IPF	Female	74	Old
GSM1149997	IPF	Female	77	Old
GSM1150073	IPF	Female	74	Old
GSM1150010	IPF	Female	70	Old
GSM1150260	IPF	Female	72	Old
GSM1150363	IPF	Female	73	Old
GSM1150365	IPF	Female	70	Old
GSM1150378	IPF	Female	76	Old
GSM1150384	IPF	Female	73	Old
GSM1150400	IPF	Female	70	Old
GSM1150401	IPF	Female	73	Old
GSM1150415	IPF	Female	74	Old

## Sheet: gene Matrix
geneNames	GSM1149994	GSM1150018	GSM1150256	GSM1150277	GSM533888	GSM1150183	GSM1150280	GSM1150286	GSM1150390	GSM533889	GSM1149950	GSM1149985	GSM1150056	GSM1150197	GSM1150306	GSM1150367	GSM595424	GSM1150125	GSM1150421	GSM1149984	GSM1150054	GSM1150058	GSM1150068	GSM1150076	GSM1150106	GSM1150111	GSM1150067	GSM1150089	GSM1150208	GSM1150247	GSM1150385	GSM1150395	GSM1150399	GSM1150404	GSM1150412	GSM1150416	GSM595423	GSM2700625	GSM2700627	GSM2700629	GSM1149977	GSM1149997	GSM1150073	GSM1150010	GSM1150260	GSM1150363	GSM1150365	GSM1150378	GSM1150384
2021-12-01	1.73256	1.92176	2.01433	1.78578	2.29362	1.80809	1.79019	1.83601	1.84109	1.90898	1.85818	1.64834	2.99544	1.80595	1.7743	1.90213	1.66057	1.70995	1.83922	1.74846	1.77141	1.89544	1.78875	1.84761	1.86399	1.81246	1.79741	1.67999	1.84803	1.82773	2.66938	2.93546	1.80676	1.79767	1.89772	1.8129	1.4145	1.70129	1.69931	1.70757	1.93635	1.74071	1.84124	1.89745	1.76321	1.81865	1.93459	1.77697	1.79861
A1CF	2.83749	6.15639	3.80056	2.37172	5.80252	2.59623	1.71253	3.598	1.81051	3.0673	2.10168	3.25909	2.45849	4.60914	4.14581	3.67935	2.32431	2.93639	5.46841	2.12513	2.49943	4.85823	3.00739	4.9428	2.25093	4.4539	2.5123	2.87656	5.36814	2.95736	4.64523	1.57756	4.16702	3.70148	2.53268	2.04585	2.9485	4.58009	4.16988	2.55689	4.27242	3.79324	2.27111	2.34032	2.06421	4.69821	3.73968	2.77831	2.83891
A2M	16.8899	17.022	16.6951	17.1183	16.0732	16.7192	16.574	16.4593	17.1795	16.9069	16.8842	16.7122	16.8058	16.9066	17.3599	17.1718	17.2436	16.843	16.5805	17.0908	16.8447	16.4232	17.0593	16.6861	16.8871	16.9211	16.711	16.9218	16.6045	16.6178	17.1288	17.347	16.887	17.1172	16.7476	16.9366	17.123	16.9774	16.8075	15.932	17.1659	16.7523	16.8283	16.8263	16.9844	16.8754	16.7548	17.4089	17.1606
A4GNT	3.6807	2.1701	1.88099	3.57654	2.58621	4.86608	1.81361	1.84219	1.85487	2.47268	2.06412	2.27592	1.85572	3.45957	2.654	1.91326	2.29429	4.75302	1.85345	2.43352	1.81017	2.45986	1.7742	2.79531	1.87475	4.20084	1.69881	1.58856	2.481	1.81749	2.8075	1.7361	1.812	1.80897	1.84077	2.69167	1.90973	1.68327	1.16563	2.95581	1.94375	1.74442	1.86728	2.25434	3.55288	1.93636	2.28037	1.82705	3.37136
AAAS	8.85629	9.19853	8.85172	8.89413	9.88127	9.10547	9.19724	8.3157	9.11936	8.88028	9.0629	8.82187	9.14729	8.87064	9.17286	9.08448	8.62565	9.09231	8.99803	8.76382	9.33426	9.00212	9.1523	8.45306	9.25288	9.46494	9.51394	9.41463	9.01059	9.20286	9.2534	9.18556	8.92177	9.233	8.94187	8.423	8.93434	8.53066	8.79113	8.66684	8.77174	9.08597	9.19022	9.12542	8.91748	8.98221	8.98487	9.00733	8.79364
AACS	9.9539	9.85602	9.92536	9.32647	9.23267	10.0984	10.2142	9.9903	9.65826	9.7998	10.0335	9.80943	9.79343	9.73487	9.60631	9.9939	9.7235	10.2558	9.73499	9.69402	9.71465	9.72559	9.95976	9.45784	10.0297	9.55055	10.1476	10.0906	9.50758	9.46152	9.73198	9.81724	9.83961	9.72501	9.91477	9.96733	9.65523	9.37185	9.96736	10.2721	9.80141	9.954	9.61331	9.86138	9.70829	9.31974	9.84803	10.0724	9.24458
AADAC	10.0332	7.34678	8.40157	7.67277	8.29137	8.33005	7.7603	7.62191	9.51808	8.85595	6.73132	8.6132	8.89504	9.09705	9.35629	7.04041	5.95759	8.18033	10.7073	7.78077	7.79761	8.07736	8.71653	6.21199	6.28798	7.88611	9.12845	8.6204	8.89909	8.3571	9.58251	8.62465	8.9233	6.07616	8.01762	8.52111	6.26254	9.42613	10.749	8.32508	10.3274	8.79402	8.36381	9.18478	8.6904	8.23948	9.2484	8.92756	7.44493
AADACL2	6.19407	5.09293	1.81624	1.81576	3.90041	1.81825	1.79002	1.82475	3.38744	2.47347	1.63388	2.26085	1.67062	5.27553	4.59737	1.95985	2.61107	1.52095	1.90129	4.37323	1.63832	2.24106	5.3942	2.82495	5.49005	1.77465	4.0279	2.49066	1.8967	1.8415	3.32286	2.27979	3.71561	3.60071	1.87584	1.82743	2.79267	1.77787	1.77402	1.79008	5.24916	2.24199	1.75907	4.80556	2.25625	3.67093	5.97148	1.80514	1.78543
AADAT	7.91369	8.09458	7.91533	7.34887	7.43071	7.92757	7.96056	7.37111	7.96494	7.70521	7.35774	7.65965	7.61017	7.8361	8.15588	8.03667	7.60091	8.30902	6.84464	7.80752	7.95949	7.33571	7.27722	7.95199	7.07779	7.93455	7.46633	7.63291	8.69097	7.44834	8.07128	7.79324	7.61292	8.00443	7.67765	6.72105	7.92446	7.28201	7.28015	8.19512	7.98013	7.68303	8.11047	8.00193	8.12089	8.02542	7.49883	7.73438	7.67027
AAMP	10.6087	10.5854	10.4386	10.6371	10.8858	10.6718	10.5297	10.6903	10.8449	10.9466	10.7564	10.4959	10.4599	10.2578	10.5936	10.8008	10.6922	10.6849	10.9012	10.7084	10.7337	10.4222	10.843	10.416	10.9178	10.3298	10.7176	10.5812	10.4953	10.5746	10.9639	10.9295	10.7836	10.2967	10.5468	10.8837	10.5645	10.6066	10.6869	11.2328	10.7979	10.6408	10.5083	10.5468	10.5344	10.0012	10.8525	10.8215	10.847
AARS	9.44717	9.74521	9.33261	9.66335	9.94797	9.63182	9.44901	9.44156	9.73947	9.65143	9.89907	9.3297	9.23554	9.06645	9.39308	9.60882	9.41662	9.89152	9.7344	9.48089	9.50197	9.21157	9.78781	9.31795	9.82619	8.97587	9.94722	9.52859	9.35604	9.54425	9.5679	9.68678	9.57913	9.22377	9.13717	9.38541	9.38933	9.28742	9.61407	9.33073	9.52903	9.48888	9.29809	9.23954	9.33078	8.62763	9.34017	9.71507	9.58388
AARS2	9.46432	9.72572	9.62197	9.71125	10.242	9.79241	9.81971	9.46703	9.73132	9.25938	9.44709	9.66579	9.61384	9.63696	9.64521	9.58489	9.79442	9.63758	9.73551	9.36114	9.87178	9.48839	9.55271	9.35287	9.95716	9.89522	10.0733	9.83609	9.57155	10.1191	9.89413	9.48773	9.57295	9.73322	9.65118	9.83813	9.84845	9.76393	9.46923	9.81996	9.71005	9.78502	9.74327	9.72776	9.85007	9.68992	9.50183	9.6908	9.31958
AASDH	7.49099	6.76936	7.0559	7.35004	5.69873	7.16293	7.16989	6.96812	7.19811	6.54894	7.57124	7.50581	6.98424	7.45505	6.89848	7.78896	7.49147	7.28873	6.90745	7.65665	7.42732	7.16703	6.91023	6.74604	7.46284	7.1098	7.87124	7.59048	7.48034	7.2815	7.23476	6.85687	7.0975	7.56464	7.21552	7.11161	7.5061	7.07217	7.31581	7.22935	7.77621	7.37599	7.03166	7.38852	8.01089	7.01503	6.72272	7.28828	7.43159
AASDHPPT	9.9767	10.0267	10.0391	9.64624	7.97898	9.85692	9.65501	10.0467	10.5097	9.92529	9.38532	10.129	9.93722	10.0837	10.0472	9.85192	10.2551	9.62234	10.3589	10.0304	10.1707	10.4145	9.70897	10.4575	9.64142	9.55426	10.0206	9.6891	9.9194	10.3687	9.79194	10.2144	10.0076	9.9464	10.0967	9.58515	10.1517	9.35811	10.3552	10.0066	10.364	9.95618	10.1242	10.0506	10.0087	10.0625	10.0067	10.2865	10.0385
AASS	7.41974	8.14285	7.26473	7.68771	7.58697	7.47513	7.98044	9.18944	8.38621	8.13881	7.62882	8.80792	7.89718	7.54129	8.10734	7.68321	7.84293	7.36861	8.8287	7.70325	8.05212	7.73349	7.80249	8.94162	7.73245	8.07925	8.13321	7.7869	7.54141	7.8309	7.75573	7.93563	7.50065	7.73656	7.67097	7.11289	7.71981	8.43878	7.8177	7.73154	7.67758	8.62454	7.40664	7.68483	7.51266	7.98944	7.10746	7.9167	7.06497
AATF	10.1585	10.1896	10.019	10.417	9.49442	10.2696	10.0257	10.4097	10.2954	10.5132	10.244	9.91025	9.98907	9.65908	10.1092	10.2094	10.1077	10.3427	10.4272	10.2789	10.2633	10.3129	10.3131	9.36173	10.366	10.0337	10.2164	10.0987	10.0921	10.1259	10.2645	10.4546	10.0811	9.97081	10.0154	10.3493	10.0143	10.0644	10.2857	10.4292	10.2207	10.2763	10.0853	10.0034	10.0565	9.72656	10.2643	10.2251	10.2565
AATK	11.2384	10.1044	10.2798	10.8177	12.6265	10.6549	10.08	8.27378	9.37509	9.58643	10.2018	8.51233	8.42332	11.3133	8.99081	10.9399	9.97189	10.7186	8.42406	10.0394	8.40369	8.5984	8.46915	10.2142	8.12262	9.50927	7.95875	9.50339	11.0513	8.47483	10.3011	9.48013	9.5155	9.55288	9.40599	10.038	9.75726	9.85015	9.84688	9.8605	9.72287	8.47904	9.54322	9.67503	10.4732	9.92707	9.90795	8.9923	11.028
ABCA1	9.68913	9.41677	9.86394	9.5978	9.81413	9.83178	10.0127	10.1879	10.3536	10.1101	9.08134	9.16457	8.82988	9.82196	10.0633	10.1424	10.5839	9.3432	9.93621	9.78121	9.65135	10.5055	9.65428	10.1744	9.09427	10.0896	9.89641	9.70109	9.49471	9.87645	9.3848	10.1128	10.1051	9.73263	10.0046	9.14834	10.212	10.1992	9.40589	8.83563	9.29089	10.1557	9.93608	10.2799	9.39773	9.5736	10.2075	9.92649	9.92246
ABCA13	7.42031	4.84049	8.50168	5.00583	6.97971	7.38482	8.98114	9.11003	5.39757	7.78635	6.26206	10.7951	8.17616	5.63201	8.20367	4.11556	3.66191	6.2467	7.49618	8.95328	9.84576	8.6335	8.51859	4.97745	6.19703	5.04464	6.04107	8.14569	8.9894	3.10069	8.18298	6.46756	8.54875	7.62822	10.1375	8.62435	3.61867	5.1511	7.7056	8.22965	10.2895	8.96823	9.2674	8.60794	7.75884	8.30311	4.51169	7.74397	4.24088
ABCA2	6.64903	6.99694	6.58315	7.0857	6.86503	6.54418	6.71012	6.46065	6.97448	6.33362	6.94315	6.52608	6.84557	6.99731	6.67768	7.22881	6.90629	6.75247	6.53165	6.7624	6.94088	6.30464	6.89702	6.87188	6.96074	6.69139	6.88023	6.84779	6.98408	6.93494	7.07777	6.83749	6.86603	6.76566	6.88482	6.95791	6.82615	7.65914	7.59384	6.62157	6.86635	6.80702	6.98362	6.66181	6.74756	6.57411	7.29577	6.72153	7.04102
ABCA3	13.7383	13.083	12.2125	12.224	13.6536	13.1478	12.1699	10.7125	12.1618	13.4717	13.4052	11.3119	10.4699	12.9703	11.2799	13.3334	12.5392	14.0743	13.5512	13.0184	10.6208	10.0259	12.0774	12.8231	9.78362	11.8369	9.47416	11.9612	12.5688	10.6009	13.3118	12.1318	11.4133	12.877	11.7769	12.8974	13.2912	12.6827	11.4286	10.2196	11.6873	10.8279	11.9961	11.9881	12.6383	10.7214	12.5267	12.71	13.3924
ABCA4	4.53005	7.40831	6.22305	6.8327	5.26296	5.20286	5.56017	3.99822	5.68614	4.99368	5.91442	5.63567	5.02395	5.12924	5.3968	5.39562	5.72851	5.38705	4.55719	5.60294	5.39248	4.93203	5.73769	5.06518	4.75465	5.39773	5.25105	5.66358	4.57471	5.35376	5.07184	5.76401	5.38473	4.78845	5.7748	5.22007	4.05771	5.51039	4.44403	6.39211	4.88855	5.18175	5.55187	5.0756	5.2739	5.34	5.90898	4.55838	5.3124
ABCA5	10.0024	9.27139	10.2705	9.49472	7.78976	9.63178	10.071	10.2699	9.76284	9.67783	8.45936	11.1333	10.8205	9.56456	10.1582	9.05977	9.6844	8.61489	9.91705	10.0987	10.6143	10.0255	10.0767	10.0417	9.58711	10.051	10.1678	10.0574	9.82964	9.90211	10.0057	9.55405	9.98153	10.2518	10.4344	9.05072	9.67418	10.1643	9.79181	10.8474	10.6225	10.3824	10.4077	10.1206	9.68932	10.3728	9.14182	9.72487	9.39626
ABCA6	9.98775	10.1629	9.41012	9.59325	9.51303	9.68071	9.72976	9.54651	9.74711	9.42249	8.76692	10.048	9.19067	10.2905	10.2087	9.81675	10.6595	8.49128	8.23894	9.89584	9.74185	8.88504	10.2336	10.7765	9.75754	9.64779	10.2981	9.92653	10.1343	10.4935	10.4693	10.2326	9.4874	10.5098	9.33331	9.80298	10.9462	10.5975	9.37397	8.86442	9.74711	8.89927	10.0894	10.4544	9.27038	10.0459	9.71738	9.85967	9.92121
ABCA8	9.94594	9.20149	8.49702	8.97551	6.20539	8.99728	8.78344	8.63958	9.86987	8.64412	8.84126	9.08752	8.31232	10.4455	9.57514	8.9212	9.69867	8.8255	7.54027	9.0932	8.88045	7.71525	9.38277	9.77715	10.164	8.42777	10.318	8.97024	9.75118	9.9504	9.98259	9.60464	9.42649	9.51487	8.42503	9.1409	10.6308	9.95042	9.01252	7.89916	9.73099	8.046	9.35107	8.93735	9.40823	9.31331	8.8038	9.1931	9.84295
ABCB1	7.33766	7.35581	6.24025	6.27226	4.99295	5.36856	7.48596	6.65832	8.28547	7.02115	6.94351	7.45019	7.91488	8.6813	7.41668	5.81746	8.27926	5.03392	8.20576	7.40151	7.72003	6.47492	6.96209	7.61544	7.02271	7.63619	7.32881	7.35395	7.53366	7.46459	8.12445	7.14867	7.93077	8.16387	7.34084	6.01704	6.80673	7.37118	7.72622	5.3741	7.53333	7.45683	7.25662	8.04797	8.28847	7.58446	7.62614	7.10152	5.74592
ABCB10	7.31139	6.44492	7.14721	7.43999	5.96473	7.25248	7.18744	7.32288	6.65541	6.99431	6.61429	7.40256	6.75431	7.29941	7.43765	7.54616	7.27944	7.17243	6.78828	7.52662	7.30553	7.50607	7.28518	7.59734	6.77435	7.02545	6.53238	6.92048	7.31439	7.37987	7.07681	7.2707	7.19147	7.09905	7.64796	7.12933	7.57449	7.25919	7.10493	7.53601	7.09565	7.09596	7.32424	7.11525	7.33629	7.0672	7.10799	7.24868	7.3877
ABCB11	3.23354	2.37424	1.84578	2.10322	2.59655	4.14602	2.09735	2.5443	2.58619	2.25228	2.03451	2.38072	2.18291	2.17714	2.40544	2.30625	1.9344	1.96911	2.17991	1.98114	3.28474	2.2573	1.99809	2.1502	2.14333	2.11378	2.45586	2.40943	2.40522	3.88237	2.07862	2.55106	2.105	2.78977	2.54374	2.09336	2.24799	1.94222	3.18035	2.6276	2.88121	2.53483	2.36439	1.97988	2.03263	2.21804	2.32232	2.0835	2.05934
ABCB5	4.99837	2.25928	1.80469	2.02242	2.98631	1.85143	2.52034	1.91559	2.01876	2.01348	2.20035	2.55216	2.1993	1.91323	1.88429	2.00619	1.58724	1.87944	1.9385	1.92798	1.92601	2.20988	1.97726	2.03661	2.03747	2.0151	3.46263	2.11944	2.03826	1.96612	1.9368	2.24461	1.81687	1.92501	1.86256	2.76648	1.81506	2.02259	2.01968	2.03177	2.12214	1.87858	2.05824	2.35681	1.94714	2.20035	2.05751	1.89935	1.88259
ABCB6	9.25787	10.3701	9.76119	9.53346	10.8154	9.79591	10.456	10.515	10.1504	9.72445	10.6359	10.486	10.4164	10.0359	10.3213	9.86296	9.62413	10.0928	10.2049	9.69513	10.4632	9.81637	10.3662	9.8116	10.5819	9.93749	10.684	10.5408	10.0343	10.5346	10.1762	9.78977	10.1338	9.89455	10.0015	9.85494	9.21381	9.99972	10.0128	9.94448	10.1414	10.0341	10.12	10.0728	9.85156	10.7636	10.1703	10.5356	9.35686
ABCB7	9.65736	9.95471	9.71461	9.52459	8.33939	9.59733	9.589	9.34643	9.54606	9.59541	9.22146	9.52299	10.0652	9.66446	9.44913	9.72487	9.68865	9.37529	9.20079	9.61061	9.49418	9.85991	9.73092	9.81238	9.47838	10.0165	9.57939	9.62073	9.50168	9.60631	9.67167	9.75787	9.14664	9.60486	9.92562	9.34948	9.74203	9.93481	9.25919	9.60884	9.89915	9.49988	9.52552	9.51819	9.38793	9.92322	9.74521	9.91008	9.53789
ABCB8	5.87796	6.27321	5.77138	5.8099	7.39211	6.03568	6.23954	5.40813	6.00707	6.21182	6.15507	5.81411	5.94985	5.84706	6.04881	6.37763	5.37479	6.3403	6.19867	5.82306	6.00433	5.99461	5.79838	5.46548	6.05626	6.2518	5.92013	5.92149	6.04373	5.64481	6.15458	6.11222	5.85572	5.78154	5.25542	6.3941	5.7127	5.72646	5.94394	6.23138	5.97806	5.77876	6.02385	5.89201	5.94465	6.54136	6.62769	6.07011	5.89276
ABCB9	4.70736	5.34866	4.28279	4.507	6.44	4.72597	4.54574	4.78775	5.76962	4.82117	5.35472	4.19718	5.01173	4.75012	4.92512	4.74901	4.81084	4.70747	6.09958	4.58957	4.97425	4.96759	5.1659	4.29404	4.91302	5.33358	4.88694	4.91678	3.10388	4.71461	5.15645	5.28347	4.82939	5.62969	4.96631	4.54685	4.61239	4.57972	5.92388	4.37952	4.31659	5.48117	4.9025	5.15712	4.36762	4.58603	4.71973	5.06472	4.48017
ABCC1	7.33195	7.3886	7.53678	8.1056	6.69179	7.44913	7.7248	8.50344	7.9947	8.32391	8.289	7.61909	7.77173	7.87051	7.80018	8.1134	8.02935	7.93842	8.40048	7.77336	7.87704	8.01572	7.28463	7.84779	7.87045	7.23601	7.59512	7.62935	7.33822	7.86069	7.27974	8.19499	7.88235	7.4279	8.14878	8.22532	8.03219	7.46906	7.46759	8.20653	7.67312	8.21591	7.98302	7.58646	7.73318	7.424	8.36452	8.23008	7.98228
ABCC10	8.81534	8.86746	8.88675	8.68449	8.8442	9.00295	9.0985	8.43028	8.92768	8.14339	8.74595	8.48287	8.96709	8.48363	8.91919	9.09825	9.21934	9.12423	8.85114	8.86726	9.13443	8.92949	8.98554	8.42105	8.90976	9.21482	9.00638	9.20077	8.76762	8.85456	8.81768	9.05402	8.89143	8.90474	8.89397	8.98128	9.01826	8.93742	8.80167	8.95335	8.72376	9.0087	9.18234	8.84366	8.89384	8.76712	9.06796	8.88307	8.7509
ABCC11	2.34744	1.9575	1.98059	2.08169	2.65569	3.77138	2.03586	2.08018	2.12574	2.18572	1.97115	1.73269	2.49128	2.11903	1.98401	2.66216	1.54832	1.89545	2.57693	2.06636	2.30162	2.60014	2.25657	1.85783	1.85718	1.84909	2.34463	2.76914	2.12013	2.49457	2.03394	2.52207	2.0323	2.00877	2.0561	2.70566	1.81688	2.06036	2.05724	2.07025	4.11554	2.30086	2.08167	2.57734	2.02546	2.15789	2.24982	2.83549	2.07102
ABCC12	1.67634	2.25418	1.83159	1.79316	2.13658	2.01077	1.76513	1.80884	1.83594	2.4636	1.88229	1.74443	1.91577	1.83168	2.01776	1.83329	2.38057	1.74834	1.83372	1.71234	1.7297	2.10525	1.75108	1.94333	1.95046	1.89746	1.80203	1.94994	1.8016	1.74469	1.79853	1.725	1.76539	1.755	1.97567	1.80458	2.34373	1.60436	2.15611	1.53017	2.1396	1.65587	1.84501	1.86814	2.10586	1.80356	1.89208	1.77902	1.87445
ABCC13	4.43934	4.20884	3.51281	3.00813	4.35597	2.95516	2.06976	2.09902	2.28414	2.33042	2.91122	1.41332	2.11696	4.13213	1.93216	2.30449	3.28925	5.32748	2.32735	3.75837	1.67368	2.02275	1.68622	1.84256	1.81706	1.8721	1.98271	2.25876	3.44968	3.03152	3.76023	2.94069	1.96425	3.6607	3.0375	4.62371	3.9218	3.32347	3.82177	2.95816	2.45061	1.58867	3.32447	2.59018	4.46324	2.56784	2.8033	2.14381	4.50813
ABCC2	3.85652	5.38076	4.47849	3.20555	4.88138	4.19644	4.72883	5.55908	4.91186	4.42872	4.48952	5.64207	5.59876	4.23316	5.56192	5.12105	3.81166	4.24216	5.30817	4.93069	5.86022	5.26031	4.7987	4.77941	5.186	5.1026	4.47088	5.00645	4.65311	4.61912	5.02839	4.50998	4.87594	4.49111	5.27759	4.43995	4.04539	3.44496	5.10004	5.41044	5.21273	6.08437	4.88832	5.26634	3.7974	5.09683	5.0966	5.43857	3.87561
ABCC3	10.6461	11.5053	11.4163	10.5509	9.79197	11.0477	11.3619	10.2723	11.1923	10.5156	11.2045	9.49013	10.6806	10.3998	10.9572	11.2469	11.2931	11.5116	10.209	11.0411	10.4196	11.1929	10.1184	11.0812	10.1976	10.8617	10.5233	10.7579	10.0319	10.2369	10.2897	10.9615	11.3776	10.8851	10.7138	10.5372	10.0193	10.9113	10.2285	9.98791	10.5841	11.2231	10.9912	10.8802	10.7217	10.6951	11.0874	10.7806	10.7525
ABCC4	6.97397	5.98795	6.34802	6.48678	4.78094	6.10398	5.80366	6.32341	6.02605	6.31133	6.95543	5.83301	5.80387	7.09513	5.78	5.86195	6.39883	6.19431	7.15226	5.70915	5.66213	5.72665	5.87574	5.82114	5.34356	6.22952	5.25686	5.75719	5.98962	5.25581	6.39755	6.06618	6.14833	6.64729	5.48369	6.3703	6.78109	6.08585	6.37446	5.48735	5.88008	6.50274	6.09157	6.48921	5.99268	5.85688	5.81253	5.58602	6.68805
ABCC5	10.8408	11.2852	11.5436	10.8104	10.6342	10.8829	11.2834	10.9645	11.0365	10.216	10.6389	11.2906	11.968	10.6862	11.5142	10.9335	11.0738	10.9499	11.2482	11.2251	11.6687	11.3031	11.1496	10.8035	11.2182	11.1191	11.3829	11.1484	11.1592	10.8138	11.1189	11.0006	11.2653	10.9917	11.4589	10.9104	10.8086	10.9074	10.9029	10.9218	12.0144	12.0075	11.8135	11.4985	11.1891	11.6237	11.1211	11.2958	10.5614
ABCC8	5.33172	9.19086	5.4242	7.69339	6.50373	7.19374	7.23132	5.54522	7.57288	10.6161	6.84563	6.64516	4.71067	7.04068	7.22897	5.95692	5.99543	4.96821	6.28179	4.99745	5.9967	5.69775	7.0683	6.59195	5.25744	7.12811	4.29396	7.97874	6.51615	6.31752	7.01989	8.13939	4.59334	6.70874	5.9432	6.41018	5.86834	4.77659	5.26677	5.06943	5.57712	5.57328	6.05489	5.54686	7.15248	7.46599	7.00064	6.90665	6.29223
ABCC9	5.06666	5.892	4.6344	5.08648	4.30102	4.46186	5.06564	4.78974	5.72009	4.67643	5.05381	4.14955	4.53428	5.06291	5.14938	5.32637	5.25084	4.48086	4.80896	4.94906	4.83086	4.65258	6.06724	5.76666	6.05529	4.75929	6.04383	4.67779	4.8306	6.24741	5.69855	5.10043	5.21067	5.60753	4.72482	4.78398	5.5091	4.83976	5.05964	4.98627	5.19071	4.71303	4.51506	4.67748	4.89917	5.15505	4.85821	5.33355	5.3558
ABCD1	6.51637	6.95452	6.87271	6.80117	8.1675	6.56181	6.77071	6.41596	6.95283	6.56907	7.276	5.66326	6.15561	6.80396	6.46405	6.75899	6.4796	6.91276	7.0854	6.638	6.17071	7.10805	6.20565	5.99202	6.43853	7.26575	6.28416	6.42979	6.46137	6.44196	6.30537	6.62575	6.58602	6.554	6.25693	6.24165	6.19227	6.85404	6.56989	5.62721	6.15166	6.47317	6.40145	7.3626	6.30246	6.50701	7.68354	6.58658	6.74225
ABCD2	3.31642	2.45644	3.21999	2.58147	3.62979	2.24781	3.36477	2.13163	2.8509	2.71757	2.26279	3.36673	3.63854	2.10055	4.00618	2.69321	2.73636	2.47132	2.50072	3.26047	3.85354	3.81846	3.51878	2.85362	2.85681	3.28182	2.93372	3.50635	2.42203	4.05915	3.79654	3.98335	4.38022	2.43648	3.77072	2.02	2.67754	3.40349	3.4189	2.77372	3.89828	3.84242	3.3544	3.41083	2.44557	2.97658	2.49741	3.36673	1.97642
ABCD4	10.4757	10.2641	10.3222	10.2803	10.5138	10.2472	10.4998	10.2599	10.2688	9.80355	10.0147	10.5195	10.1778	10.575	10.5318	10.1668	10.8714	9.96326	10.1721	9.78585	10.1127	9.87592	10.6238	11.0808	10.7618	10.9951	10.6322	10.4574	10.426	10.4379	10.451	10.1052	10.416	10.2556	10.3058	9.70927	10.7587	9.79631	9.79427	9.80278	9.94098	10.0987	10.0635	10.3981	10.4024	10.6559	10.325	10.4156	10.4109
ABCE1	7.14643	7.34701	7.27285	7.11804	4.98974	7.19208	7.2927	8.3828	6.67106	7.89629	7.32925	8.21283	7.44032	7.3609	7.39658	7.10183	7.27965	6.72177	7.3139	7.28322	7.67439	8.00366	7.32499	7.52124	7.24954	7.05217	7.52626	7.30824	7.19611	7.7719	7.06567	7.16014	7.08303	6.90337	7.3679	6.98673	6.90906	7.63622	7.24675	7.54731	7.90168	7.40646	7.42133	7.35303	7.56626	7.39044	7.3185	7.59542	7.10298
ABCF1	10.5142	10.9677	10.558	10.7028	11.1497	10.6102	10.502	11.1653	10.5409	11.2919	10.9245	10.3799	10.4993	10.1583	10.5614	10.5341	10.3434	10.7505	11.1885	10.373	10.536	10.4806	10.3972	9.72635	10.5423	10.4254	10.7603	10.4863	10.295	10.4479	10.5619	10.8324	10.586	10.331	10.4615	10.5921	10.3127	10.8565	10.3853	10.7115	10.5449	10.7459	10.4638	10.3433	10.6066	10.3051	10.6701	10.5227	10.6666
ABCF2	8.63728	9.39374	8.95607	9.3058	8.21684	9.13819	8.95455	10.1117	9.50133	9.80238	9.56959	9.45849	8.94861	8.96243	9.32819	9.30221	8.93239	9.28602	9.92637	9.2007	9.47875	9.42693	9.2097	9.03299	9.45174	9.09465	9.52855	9.38305	8.92526	9.31976	9.07269	9.53035	9.24652	8.79882	8.98108	9.69754	8.8666	9.68321	9.01509	9.51491	9.31533	9.14595	9.30225	8.70541	9.35126	8.671	9.45601	9.2906	9.089
ABCF3	9.89741	9.86695	9.8469	10.0577	10.2596	9.96637	9.8952	10.2057	9.47699	10.3375	10.034	9.83166	9.80957	9.617	9.8491	9.91135	9.80113	9.92073	10.4384	9.80713	9.84536	9.83229	9.86274	9.10277	10.1297	9.76416	10.0052	9.83682	9.84729	9.98742	10.0526	9.86369	9.58032	9.64102	9.80144	10.1243	9.8699	9.87905	9.67825	10.0845	9.7296	9.94481	9.73835	9.73221	9.91161	10.0269	9.63469	9.90269	9.80789
ABCG1	10.4368	9.75158	10.8203	10.9579	8.76233	11.0264	9.91907	9.2927	9.31703	9.61551	10.011	9.10438	9.04934	10.1918	9.32074	11.3021	10.5328	11.1373	10.0252	10.7178	9.29773	10.2433	9.49631	10.4283	8.74209	11.5173	8.25273	9.52714	9.97342	8.96184	9.97411	10.1987	10.0201	10.7612	10.4863	10.054	10.6351	10.174	9.72607	11.4459	9.41877	9.05054	9.86933	10.2053	10.2833	8.6997	10.346	10.0478	10.411
ABCG4	4.02801	6.317	4.12441	4.85013	4.77077	4.20177	5.25619	4.70894	5.60061	4.57402	5.68393	4.23	5.17635	5.45922	4.37865	4.3875	4.51452	4.60505	4.96219	4.54461	4.69781	3.91812	5.07457	6.83694	6.57557	5.72552	5.29209	4.99977	4.50134	5.34468	4.61598	5.20171	5.63829	5.08428	4.63924	3.99009	4.20943	4.79807	4.91028	5.40472	4.38053	5.48322	4.73175	5.00315	4.65217	4.36314	4.93305	4.14688	5.00921
ABCG5	3.57457	2.35681	3.34631	2.85091	4.26303	2.42091	3.17743	3.00382	3.84973	2.89473	1.86044	2.89612	3.12564	2.29446	3.38183	2.32628	2.35308	2.89915	2.54396	3.64021	3.25924	2.99554	3.36531	4.10068	1.60369	2.90331	3.13274	3.12646	2.59812	3.12749	2.88438	3.36587	3.18897	4.43491	3.4397	2.87038	3.46463	1.94834	3.11582	3.67491	3.58263	3.20055	2.65244	2.4482	2.84885	2.50833	2.99651	2.03806	2.55992
ABHD1	6.73315	6.04475	5.41576	6.61633	8.49172	5.96212	6.5835	5.91269	6.58313	6.41914	6.00123	5.62666	6.2698	6.6531	6.04353	5.84456	6.08126	5.81461	6.40261	6.17336	6.0032	5.46448	6.40494	6.27238	6.99922	6.92079	6.18187	6.44995	6.485	6.89867	6.89351	6.24274	6.44724	6.3726	6.09456	6.22442	5.84113	5.13714	6.52643	5.99037	6.02536	6.19072	6.75243	6.46274	5.70376	6.49385	6.53603	6.00701	6.32231
ABHD10	2.35282	2.81724	2.59416	2.55806	1.28207	2.48708	2.5075	2.57888	2.52643	1.93881	2.52048	2.35364	2.53981	3.18094	3.07062	2.49357	2.90966	2.43394	2.58375	2.34937	2.4457	2.75193	2.47997	2.51019	2.51222	2.66696	2.31997	2.28509	2.50858	2.38135	2.56469	2.40853	2.44476	2.4522	2.41394	2.56239	2.89783	2.1583	2.40487	2.55505	2.66452	2.33801	2.56312	2.45193	2.49546	2.56577	2.5659	2.55455	2.56442
ABHD11	8.05367	7.64724	8.62197	7.65731	9.5214	8.49251	8.37206	8.47874	7.95381	8.06621	8.5315	9.77928	9.61584	7.33006	8.36511	8.15251	7.78769	8.10804	8.76546	8.7272	9.03531	8.62627	8.63762	7.74143	8.35551	7.92603	8.08328	8.73071	8.42932	7.75653	8.33679	8.20656	8.22702	8.31865	9.3779	8.96261	7.65417	7.95217	7.95043	9.71171	8.75616	8.48646	8.57557	8.33692	8.09563	8.55454	7.80878	8.14801	7.20072
ABHD12	8.75099	8.8544	8.81984	8.81952	9.52589	9.02833	8.88999	8.20956	8.66886	8.6689	8.47717	7.78659	8.70257	8.46146	8.37582	9.26049	8.55377	9.20551	8.28964	8.6805	8.46271	8.89316	8.62288	8.22065	8.54951	8.49679	8.41706	8.62162	8.95883	8.37713	8.19919	8.62358	8.78024	8.49659	8.46681	8.92676	8.34506	8.66972	8.59339	8.11073	9.11872	8.28892	8.4855	8.23203	9.16841	8.264	8.60514	8.601	8.98774
ABHD13	5.7707	5.71134	5.74141	5.68587	4.59952	6.17513	5.08861	6.02059	5.21061	5.61665	5.57395	5.83755	5.69732	6.39559	5.82419	6.00554	5.91569	5.57912	5.10154	5.17183	5.34314	5.58732	5.25677	6.67774	4.93442	5.09532	5.11956	5.38284	6.37906	5.83235	5.34585	5.56313	5.44167	4.99068	5.45683	4.79427	5.87014	6.19396	5.51679	5.7436	5.62896	5.49485	5.41667	5.59758	6.09012	5.94248	4.78495	5.52922	6.07624
ABHD14B	9.06226	8.85801	9.04517	9.33481	8.58869	8.87113	8.93457	8.60946	9.32632	8.92854	9.1879	8.55798	9.03293	7.97217	8.80255	8.99203	8.95326	9.28471	9.07007	8.87236	9.13439	8.92807	9.25037	8.66158	9.18565	8.87602	9.17496	9.19068	9.115	9.38197	9.1918	9.22032	9.08788	9.1637	9.07355	9.24703	8.99914	9.13158	8.9522	8.99167	9.16804	9.12292	9.27788	9.27791	9.02653	8.86014	8.90564	8.99467	8.65286
ABHD2	10.8614	10.115	10.5756	10.1304	8.51177	10.4162	10.1205	10.3081	10.1546	10.4987	10.0626	9.96953	10.4314	10.1546	10.516	10.7606	9.91598	10.3539	9.83589	10.6846	10.4782	10.5254	9.5469	9.86346	9.84212	9.82163	9.42028	9.99883	10.2254	9.81124	10.3181	10.6347	10.5994	10.4623	10.7771	10.5779	10.0709	10.1219	10.2034	10.7041	10.8028	10.2928	10.3643	10.2608	10.4129	9.53251	10.1409	10.168	10.5004
ABHD3	8.09277	8.47039	8.26491	7.94042	7.11685	8.07431	8.07226	8.11352	8.22417	8.08433	7.82158	8.16705	7.94984	7.92108	8.03521	8.67752	8.37054	8.29011	7.72321	8.39522	8.15237	8.54569	7.7547	7.9297	7.49032	8.30433	8.15159	7.5967	7.95885	8.00153	7.63355	8.18128	8.25467	8.21618	8.27566	7.73048	8.32544	8.09524	8.22391	8.00649	8.06013	8.17268	8.38438	8.11986	7.89487	7.84492	8.44578	8.25477	8.19899
ABHD4	9.24627	9.71784	9.00625	9.12466	9.52933	9.07398	9.30425	8.88307	9.19776	8.92019	9.35588	8.73116	9.17964	9.19538	9.00911	9.24033	9.0434	9.45945	9.13313	8.89842	9.07347	8.91145	9.34902	9.30174	9.29519	9.40501	9.4341	9.29566	9.31259	9.05073	9.11667	9.0022	9.14637	9.26859	8.8318	9.23973	8.99078	8.89461	9.24503	8.46445	8.95363	8.89074	8.96235	9.20635	8.77683	8.69944	9.19514	9.20515	9.18691
ABHD5	9.76063	9.74309	9.98494	10.0278	9.38705	9.99982	9.52031	9.50056	9.20552	10.1863	10.0552	9.79845	9.28177	9.99159	9.08947	10.4212	9.54179	10.2604	9.38979	9.50928	9.21114	9.97125	8.9999	10.0822	9.00175	10.1693	9.22126	9.08451	9.7465	8.50637	9.3089	9.33203	9.53573	9.9258	9.33087	9.50267	9.53212	9.74478	9.46248	9.70849	9.12507	8.91362	9.39232	9.08789	9.971	8.93308	9.62422	9.67184	9.52696
ABHD6	10.0006	9.59902	10.0249	11.3158	10.3908	9.91459	9.98402	10.0806	9.77539	9.91131	9.59779	10.4823	10.2306	10.6925	10.0182	9.75998	9.8345	9.69732	9.3562	10.0676	10.6357	10.313	9.63514	9.80408	9.66575	10.1648	9.6013	9.43832	10.2988	10.2592	10.2091	9.49166	10.0827	9.91051	10.134	9.88457	10.1101	9.69906	10.0195	10.7803	10.326	10.1268	10.039	10.122	10.088	10.1763	9.72567	9.83134	9.50945
ABI2	9.4525	9.1557	9.01068	9.36862	7.52055	9.30265	8.99005	9.24736	9.27221	9.08334	8.8473	9.48963	9.46665	8.9862	8.95464	8.56775	9.55485	8.91381	8.25404	9.41679	9.72519	9.18345	9.44197	8.91041	8.99073	8.83384	8.62788	8.78704	9.01763	9.23381	9.41409	9.40825	8.98198	9.29221	9.58045	9.79353	9.77545	10.2339	9.01656	9.03658	9.85456	8.89145	9.38179	8.7238	9.14709	8.95936	8.26609	9.39073	9.81552
ABI3	9.0867	8.70546	9.13474	9.63928	9.03514	9.48448	9.04252	8.43483	9.21198	9.319	9.04231	8.67594	8.62835	9.26241	8.49828	9.35638	9.24829	9.35532	9.27422	9.13173	8.91033	9.32034	9.02139	8.76501	8.87233	9.96417	8.98148	9.04373	8.96649	8.97043	9.03552	8.95085	8.88806	9.07326	8.83992	9.29589	9.11192	9.22502	9.04179	8.0367	8.37637	9.20936	8.83497	8.97371	8.98028	9.02699	9.93257	9.11757	9.352
ABI3BP	10.7124	9.73649	9.46521	10.8741	8.26453	9.75547	9.21042	9.6216	9.61012	9.90106	9.22269	9.82798	8.96238	10.5295	10.093	10.1377	10.8546	9.72216	8.8445	9.93576	9.60312	8.76898	10.4227	10.9062	9.69408	9.25424	9.67564	9.91985	10.8294	11.021	10.321	10.4915	9.6636	10.2781	9.46105	10.2582	11.7586	10.5533	9.70814	8.71638	9.79926	8.88098	10.2706	10.1187	10.3525	10.074	9.73329	10.0543	10.8038
ABL1	4.30212	4.47627	5.08146	4.4938	4.69337	4.33168	5.75101	5.30779	3.07335	5.9204	4.70797	4.79549	3.94528	5.77488	4.87478	5.70047	5.34762	5.84448	5.33241	4.22851	4.38563	4.83008	3.80947	4.98387	4.01123	5.22749	4.64095	3.58265	4.72098	3.4546	4.53349	4.64179	4.77144	4.39861	4.80326	5.07285	4.69566	5.85318	4.58122	4.61597	5.30053	4.78695	4.26761	4.26737	4.34535	3.37878	3.60296	4.81646	5.43809
ABLIM1	13.7209	13.2279	12.5628	13.2682	11.5091	13.2987	13.0525	13.698	13.0863	13.3802	12.8504	12.6851	13.3741	13.607	13.1583	12.8948	13.2738	12.8196	13.0749	13.1914	13.326	12.8729	13.078	12.9665	12.9493	12.8399	12.9406	12.9977	13.7656	12.6999	13.5507	12.9624	13.0139	12.9844	13.0629	13.5245	13.9025	12.7718	13.3993	13.091	13.1207	12.9076	13.2266	13.1718	13.6647	13.1775	12.537	13.2576	13.4623
ABLIM2	8.93233	9.5834	12.9717	9.10009	8.21488	8.85812	8.75713	10.2	9.5418	8.77583	8.70874	9.19414	7.98957	9.4408	8.75566	8.51897	8.47995	8.54699	8.84952	8.44021	9.11186	8.4345	9.16606	9.71219	10.1007	8.96494	9.46779	9.14565	8.69036	9.22621	8.69622	8.6054	9.00575	8.70336	8.43098	9.05062	8.41669	9.02501	8.79922	7.94517	8.49859	8.27016	8.11366	8.26175	9.11867	8.7891	8.91571	8.98502	8.49189
ABLIM3	6.61998	7.26053	5.61873	7.33625	5.90537	6.1661	6.33967	7.9938	7.13066	7.58293	7.43911	6.38175	6.81829	6.84338	7.12138	7.46904	7.07873	6.84928	7.81252	7.02706	7.00564	5.32791	7.10808	7.38161	7.72658	6.32515	6.61963	6.47167	6.76614	7.97014	7.33141	7.45885	7.24254	7.22463	5.98168	7.0708	7.71967	7.55918	7.16137	5.71484	6.95462	6.12608	7.35943	6.74	7.01133	5.77466	7.0065	6.89671	7.85068
ABR	13.0755	13.2825	13.0745	13.6318	13.3481	13.0543	13.013	12.5597	13.2571	13.4967	13.1029	12.3001	12.9302	13.2186	12.9183	13.4811	13.1473	13.2551	12.9793	13.4667	13.3105	13.588	12.6746	12.4992	12.7886	13.9049	12.365	12.8404	12.9957	12.1914	13.156	13.3534	13.1209	12.9178	13.0983	13.1866	12.7878	13.2552	13.1313	13.3474	13.2441	12.8712	13.1526	12.945	12.9261	12.8103	13.6173	13.6306	13.5603
ABT1	7.4177	7.43997	7.30074	7.2316	7.7457	7.30288	7.38546	7.89889	6.99719	7.97164	7.58925	6.78582	6.92133	7.42494	6.74218	7.42014	7.20172	7.76175	7.93026	7.49316	6.877	7.4305	7.43795	6.01623	7.84557	7.13511	7.53132	7.24462	6.62289	7.74439	7.6154	7.37116	7.31685	7.43433	7.57965	7.7094	7.27901	7.64525	7.6917	7.45091	7.4716	7.54343	7.21208	7.4625	7.19511	6.83202	7.31803	7.57122	7.8306
ABTB2	8.46671	8.52506	7.57446	8.44608	8.31193	9.2264	8.16334	8.39596	8.46096	8.92996	8.6829	7.5832	7.77949	9.08713	8.51431	8.44856	7.99333	8.75189	7.08454	7.97875	8.06127	7.43209	8.33645	8.69081	8.50041	8.21987	8.54493	8.35704	8.2582	8.24677	7.56401	8.58255	8.32837	8.51701	8.02083	8.48068	7.64065	8.75361	8.41186	7.71993	7.4871	7.7499	7.81181	8.31091	8.51981	8.20947	8.463	7.90614	7.95982
ACAA1	11.3729	11.0507	11.7307	11.7159	10.5912	11.7966	11.5297	11.0394	10.939	11.0776	11.6428	10.8202	11.511	11.4695	11.301	11.5449	11.5882	11.8735	11.6158	11.3486	11.0131	11.3206	11.2929	11.0467	11.2338	11.6238	11.3523	11.5119	11.4352	11.4186	11.3823	11.3246	11.4182	11.4521	11.202	11.4021	11.6668	11.3339	11.4327	11.2053	11.1539	11.508	11.3063	11.7006	11.5439	11.4446	11.3083	10.9338	11.3141
ACAA2	11.4939	10.4456	11.3123	11.2142	9.7328	11.3881	10.9741	10.1856	10.2285	10.9956	11.1063	10.3272	10.8517	11.4047	10.9337	10.9685	10.8181	11.6706	9.72564	10.8786	10.0277	10.748	10.5457	11.3318	10.4205	10.9239	10.8573	10.7112	11.2524	10.91	10.6412	10.4275	10.7295	10.9514	10.3925	10.4304	11.3071	10.5569	11.0117	10.7902	10.5532	10.5612	10.6845	11.3314	11.3091	10.7222	11.0386	10.5275	10.8179
ACACA	5.61949	5.21713	5.05782	4.13607	4.93839	5.56684	5.30019	5.29552	5.20968	5.44156	5.85279	5.14853	5.55973	5.99206	5.08027	5.64018	5.28191	6.13183	6.19766	5.71831	5.1312	5.33356	4.93142	5.23539	4.09975	4.92004	5.91903	5.50843	5.15463	2.91394	5.08819	4.7742	4.697	5.4868	5.21974	5.59996	5.28974	5.22207	5.21857	5.23316	5.38437	4.69523	4.60855	5.5705	5.56085	4.76242	4.92861	5.56898	5.44687
ACACB	6.39772	6.75082	6.27574	7.34012	4.74349	6.25167	7.54612	5.57138	6.87594	5.96481	6.48457	6.23468	6.83286	6.17825	6.74963	7.33982	6.47717	6.00397	6.98708	6.84564	6.76335	6.01957	7.39132	6.88224	8.16901	7.20697	6.82618	6.66822	6.31559	7.62136	7.38927	6.94592	6.58004	7.43589	6.89222	6.74316	6.58317	6.56761	6.89477	5.74577	6.54965	5.75526	6.6958	6.28039	6.08896	6.36848	6.58024	7.09185	6.91477
ACAD10	7.04602	7.10305	6.97784	7.42228	6.54999	6.7241	6.9169	6.208	6.61911	5.86888	6.94107	6.58141	7.1723	6.05009	6.91107	7.33729	6.73347	6.90439	6.95961	6.95328	7.0289	7.32572	7.01215	6.27972	7.16364	6.80623	7.26646	7.09585	6.9668	6.9594	6.83941	7.24073	7.01211	6.9293	7.04814	6.73213	6.64025	7.14747	6.84713	7.28644	7.10182	7.42905	6.89515	6.98325	7.01044	5.94968	6.95898	6.87389	7.05231
ACAD8	7.82611	8.18556	7.99009	7.80917	6.30334	7.56434	7.86695	8.55324	8.60759	8.12349	8.62131	8.45357	7.78372	6.8284	8.03631	8.26598	8.17165	7.88664	8.48517	8.38186	8.34484	8.21603	8.18356	7.79871	7.99033	8.10445	8.08271	7.90126	7.20071	8.00652	8.21253	8.18563	8.76882	7.70608	8.60686	8.45466	8.31711	7.89732	7.68208	7.58514	8.23059	8.61744	8.4599	7.68152	7.58258	7.19059	7.61959	8.06647	7.76115
ACAD9	9.7641	9.38153	9.06212	9.55272	9.72642	9.37214	9.3458	8.91486	9.29491	9.27703	9.48944	8.92605	9.29346	9.62238	9.33653	9.42628	10.0129	9.46812	9.41642	9.29261	9.466	9.52825	9.30891	9.15626	9.45076	9.27958	9.27325	9.27313	9.38694	9.12889	9.40571	9.5206	9.4477	9.12672	9.19734	9.53901	9.36688	9.25899	9.33207	9.38848	9.31176	9.37327	9.27344	9.22513	9.19469	9.03336	9.35229	9.48451	9.51964
ACADM	9.39461	8.93017	9.40023	8.98052	7.64001	9.47885	9.33286	8.87004	8.6558	8.73695	8.97468	9.79816	9.46409	9.69806	9.13806	8.98607	9.52147	8.65391	8.62745	9.26636	9.23538	9.24174	9.29531	8.96345	8.86767	9.20765	8.68839	9.16217	9.34908	9.05607	9.25278	9.14317	8.71543	9.05111	9.231	8.79332	9.63371	8.67669	9.3723	10.1033	10.1875	8.68503	9.10956	9.17649	9.13674	9.40315	9.10474	9.57223	9.52985
ACADS	8.02566	7.56124	7.87797	7.96149	8.20804	7.92105	7.75676	6.6506	7.45384	7.45183	8.10177	7.07386	7.86942	7.95644	7.67555	8.02089	7.90992	7.78656	7.66053	7.65984	7.35168	7.72718	7.61524	7.24726	7.55417	7.92545	7.30818	7.42907	8.00401	7.47959	7.89058	7.54381	7.59817	7.72026	7.63774	7.9251	8.11717	7.77916	7.6142	7.35282	7.48431	7.79202	7.72665	8.17158	8.02187	7.43663	7.81682	7.73013	8.03152
ACADSB	6.73436	7.61178	7.23077	5.88383	4.45334	6.44129	6.94634	6.75199	7.22246	6.26905	6.40617	6.38733	7.17637	6.74091	7.0977	6.98578	6.5046	6.48882	7.11975	6.54549	6.63124	6.88495	6.52153	6.12631	6.03251	6.66008	5.8773	6.94313	6.23442	5.87774	6.53005	6.50478	6.37015	6.37315	6.33769	5.9963	7.04898	6.55213	6.48059	6.58879	7.26358	6.88358	6.34425	7.11676	6.17503	7.09105	7.39964	6.91243	6.24816
ACADVL	13.8463	14.4765	13.9945	13.6138	14.158	13.9114	14.3353	14.1003	14.1307	14.2093	14.2834	13.6647	14.0306	13.6471	13.9009	14.1497	13.6864	14.3666	14.3626	13.781	13.7924	13.633	14.0989	13.2845	13.948	14.3235	14.1679	14.076	13.6195	13.7188	14.1383	14.1326	14.3056	14.0856	13.5817	13.7026	13.8734	13.9433	13.8202	13.9811	13.9649	14.0831	14.2157	13.8653	13.8099	13.7411	14.0324	14.0491	14.0092
ACAN	6.74411	10.1864	7.78541	6.24984	7.34941	6.34054	7.10828	8.08571	8.85949	7.80027	9.19834	8.74932	7.52691	7.8205	8.01505	6.12692	6.351	6.85336	7.8786	8.20768	7.34768	8.39513	8.86902	7.77744	8.98929	9.23668	9.79339	8.79199	7.9929	8.23797	7.15181	7.82002	8.28016	8.90158	7.51665	6.82878	6.37701	7.17554	7.16929	7.19535	6.81694	7.73491	7.27964	7.30043	6.41284	6.67316	7.44934	8.07842	7.43735
ACAT1	9.53215	9.89782	9.30164	8.8607	7.88931	9.73549	9.03979	8.64252	9.28073	9.29075	9.77718	9.30985	9.13773	9.68359	9.27862	9.14868	9.13339	9.31873	8.6027	9.22007	9.3987	9.05622	9.24456	8.41041	9.10898	9.52919	8.70525	9.20929	9.82099	8.95441	9.3559	9.14047	8.92554	9.47675	8.73649	8.99834	9.89223	8.72819	9.40413	9.22514	9.36652	8.7471	9.32666	9.40855	9.37905	9.21614	9.191	9.6658	9.97781
ACAT2	10.9618	10.4511	10.7935	10.297	9.9763	10.7713	10.3416	10.0157	10.4212	10.8667	11.3898	10.0425	10.7901	10.7614	10.2988	11.2833	10.3205	11.3446	10.3859	10.6064	10.2252	10.4134	10.3141	10.8412	10.4191	10.3126	9.99952	10.4573	10.9969	10.0572	10.8183	10.5155	10.1745	10.255	10.314	10.9534	10.4468	10.6411	11.0833	11.0389	10.5565	10.3596	10.5599	10.2164	10.4693	10.5746	10.6487	10.951	10.5805
ACBD3	8.42902	8.54203	8.2208	7.97652	7.04041	8.21897	8.22788	8.78216	8.30447	8.49147	8.41513	8.21616	8.26123	8.56145	8.17292	8.40108	8.58159	8.35911	8.40108	8.29803	8.02505	8.22887	8.18998	8.48418	8.28876	8.22801	8.30898	8.32584	8.15936	8.11161	8.16767	8.51846	8.10037	8.01133	8.05054	7.90714	8.75482	8.05635	8.4318	8.67784	8.35189	8.2725	8.2335	8.24413	8.03002	8.11515	8.32059	8.54264	8.60017
ACBD4	8.3736	6.19857	10.2597	9.89752	7.95849	11.4007	8.73429	9.56309	6.92516	6.71548	9.24651	8.69284	7.91352	8.95183	9.13727	7.64179	8.45017	9.85102	8.90632	8.34709	7.89324	7.78009	10.5896	10.6205	8.98459	6.91707	11.1478	11.0133	10.4819	11.2624	7.33078	8.92719	8.31565	7.62054	7.52584	8.4246	9.72278	9.41295	9.18105	8.71821	7.13705	10.2894	9.01227	10.3352	9.93746	7.17867	8.95995	6.9143	7.08029
ACBD5	6.51355	3.14514	6.62271	6.14276	2.26409	6.80578	6.1663	6.05383	4.13426	4.62287	5.7411	6.08658	5.52078	7.25288	6.26137	5.671	5.88534	6.31326	4.21173	4.59154	5.11035	5.53875	5.88542	6.85007	4.99498	6.11775	6.45744	6.20447	7.31591	5.88345	4.62956	5.09886	4.41558	4.10592	5.19505	4.43175	6.873	4.39451	4.39156	4.80328	4.92362	5.78852	5.46158	6.48793	6.87414	6.18216	4.94955	5.23834	6.04503
ACBD6	10.7656	11.058	10.894	11.1478	10.6693	11.0715	11.0159	10.476	11.0427	11.0246	11.1317	10.7155	11.1176	11.0493	11.1473	11.0703	10.8535	11.185	10.9614	10.9696	10.903	10.9327	11.2132	10.9318	11.3081	10.815	10.7487	11.2718	11.0794	10.9068	11.2961	11.1159	11.0559	11.0922	10.7752	10.8257	10.803	10.8503	10.9999	11.2513	10.953	11.0425	10.7895	10.9507	10.9566	10.8058	10.9636	11.0642	11.1601
ACE2	5.68305	7.00891	5.74303	6.02586	6.27761	6.6827	5.87171	7.41847	6.48128	6.73952	8.20323	6.76386	7.20728	6.10084	6.11036	7.26691	5.80069	6.67287	7.81326	6.01938	6.27157	6.03019	6.23259	7.00882	5.99064	5.46813	5.91996	6.94561	5.99741	5.06776	6.19684	6.21837	6.15379	6.6196	5.7637	6.26427	6.01692	6.33558	6.23703	6.73413	5.90309	6.4239	6.1477	5.95782	5.83731	6.26353	7.19639	6.67156	6.14092
ACHE	5.91873	6.70012	7.17408	5.93397	7.13029	6.58284	7.88038	7.41071	6.16828	6.49852	6.67365	7.42303	9.169	6.05127	6.48466	5.80115	6.44565	6.44607	6.85139	6.18362	7.42111	7.66828	7.11126	6.72613	6.78691	6.38331	7.7431	7.48416	6.67229	6.43227	6.04904	6.40743	6.70373	6.08843	6.56557	6.75107	6.32025	6.71222	6.54997	6.23914	6.11446	7.15367	7.1156	6.41383	5.81105	7.92676	6.48126	6.8218	5.91952
ACIN1	8.90573	9.22764	8.88607	9.30514	9.18651	9.05422	9.11483	9.13102	9.15144	9.5202	9.18891	8.83198	8.74812	8.24259	8.51111	8.36338	8.87964	8.64104	9.36749	9.06924	9.14469	8.58943	9.20814	8.84926	9.34951	9.70523	9.06204	8.78429	8.28506	9.38368	9.24507	9.23236	8.87032	9.02283	9.25213	9.43581	8.95493	9.04403	8.91464	8.84628	9.08985	8.90419	9.21342	8.57237	8.59616	9.00893	9.19239	9.43853	8.94321
ACMSD	1.79301	2.07938	1.82275	1.9824	3.14184	1.90795	2.86893	1.96765	2.0023	1.95651	2.24394	1.81532	2.06428	2.01156	1.83624	1.96456	1.47766	2.02838	2.05971	1.82926	1.83539	2.00945	1.86382	1.94166	1.96236	1.88835	1.84905	2.68264	1.94477	1.78993	2.00218	1.80319	1.86072	1.88039	1.84013	1.9792	2.05444	2.23509	2.02507	2.45958	2.05343	1.81664	1.92877	1.97714	1.89834	2.05056	2.10465	1.99018	1.96159
ACN9	8.9421	9.10704	9.20416	8.7311	8.63645	8.96293	8.74884	8.76241	9.11695	8.77358	8.77993	9.25995	9.14861	8.95655	8.9358	9.09631	8.72384	9.33558	8.5743	8.83335	8.8434	9.16523	8.79063	9.90349	8.87906	8.56728	8.88917	8.70036	8.98694	8.88094	8.78793	8.69352	8.94635	9.03693	9.03496	8.51086	8.88551	8.61365	8.96702	8.94801	9.11069	9.15827	8.90412	9.49665	8.83211	8.8959	8.83478	8.5496	8.65224
ACO1	9.91253	9.64189	9.87475	9.59633	8.46566	9.96415	9.4547	9.20461	9.31479	9.58433	10.1242	9.45793	9.20375	9.87324	9.28808	9.91363	9.99324	10.5688	8.57098	9.72935	8.99727	9.45281	9.32393	10.1957	9.7154	10.1514	9.43801	9.51749	9.6741	9.51986	9.43068	9.43133	9.50338	9.92322	9.37435	9.62703	9.87243	9.33435	9.36085	8.8786	9.06702	9.13967	9.46118	9.63522	9.94174	9.19169	9.6001	9.65999	9.40279
ACO2	12.315	12.3397	12.3677	12.1436	12.7283	12.3362	12.1741	12.1917	12.4278	12.4359	12.5358	12.3694	12.3839	12.2108	12.1781	12.4714	12.2373	12.6628	12.118	12.436	12.4539	12.4507	12.3545	11.872	12.3265	12.1277	12.1077	12.2516	12.0302	12.0569	12.2761	12.6399	12.2425	12.2752	12.393	12.422	12.2251	11.9605	12.421	12.4251	12.3396	12.2232	12.3578	12.2471	12.4766	11.7302	12.3302	12.4431	12.6037
ACOT11	8.03275	8.55222	8.4426	7.78753	9.80975	8.54811	8.91183	8.1233	8.85381	7.98067	8.73183	8.63142	9.43769	7.89049	8.59147	8.48107	8.20929	8.25507	8.96017	8.20197	9.02792	9.32626	8.57435	7.8154	8.45892	8.30152	7.55239	8.69676	7.57608	7.67851	7.76936	8.11183	8.14763	7.98389	8.68784	8.56416	7.59383	8.12885	8.51511	9.20295	8.87835	9.03655	8.76094	8.86125	7.76108	8.35707	8.78081	8.44207	7.69297
ACOT12	3.0357	1.9625	3.1133	2.29325	4.36461	2.66765	1.63586	1.85199	1.69129	2.38942	3.11937	3.00773	2.29325	1.70966	1.86001	1.78865	2.27646	1.86161	2.94321	1.51737	2.8577	1.91506	1.55646	3.53607	1.61621	1.62332	2.01593	3.19073	1.72667	2.27673	2.76501	1.93665	2.25943	3.53628	2.05806	2.73656	1.69457	1.34481	2.5781	3.08224	2.4734	3.17938	3.59157	3.18955	2.27859	1.76812	1.9298	2.61095	1.60478
ACOT4	8.0796	7.42894	8.49806	8.38197	7.85004	8.27486	7.93307	6.04597	6.78552	6.82061	8.34726	7.18918	7.94929	7.68332	7.01844	8.40149	7.64138	8.98722	6.99737	8.08755	7.81328	8.42344	7.16785	8.34788	7.11101	8.76141	6.55323	7.46383	8.12963	6.82415	7.34246	7.1302	7.68848	8.20462	8.10474	7.82338	8.14124	7.76683	7.43345	7.66033	7.32997	7.37167	8.11085	7.88711	7.77245	6.9199	7.71616	7.65419	7.80003
ACOT7	10.0151	9.83888	9.75403	8.85342	8.69822	9.70224	9.66941	8.9403	9.5119	9.93379	9.89473	9.00518	9.56809	9.80086	9.8417	9.92328	9.78267	10.1967	9.78969	9.58116	9.47458	10.1512	9.48378	9.09964	10.0303	10.3482	9.20083	9.52093	9.02549	8.92157	9.24506	9.47591	9.35552	9.44567	9.69209	9.57193	10.0101	9.10017	9.09811	10.419	9.11386	9.28651	9.38246	9.85648	9.42773	9.17488	10.3334	9.06464	9.5717
ACOT9	8.95295	9.1578	9.22285	8.98859	8.56183	8.93722	8.87315	9.1026	9.17806	9.58265	9.4327	9.08803	9.02352	9.15375	9.03021	9.33248	9.11341	9.37214	8.97906	9.20553	8.97402	9.73111	9.14096	9.00146	9.00826	9.20275	8.90535	9.19547	9.16492	8.50056	8.65805	8.81499	9.22778	9.04225	8.94872	8.98607	9.32126	9.66706	8.67086	9.0643	8.96399	8.96834	8.66735	9.0071	9.09143	8.65641	9.65755	8.90108	9.22088
ACOX2	10.0549	10.0148	9.52729	9.90159	9.43101	9.43066	10.0938	8.74369	9.83517	9.3518	9.69503	9.30437	9.81118	10.5994	9.89625	9.79078	9.8785	9.57492	9.32248	9.76705	9.71244	9.39212	10.0778	10.178	10.1663	9.64267	10.0357	10.1318	10.6904	9.84913	10.0811	9.73527	9.47952	9.89134	9.47778	9.7164	10.2527	9.3183	10.3347	9.01411	9.74616	9.51109	9.76747	10.2233	9.96648	10.233	9.2445	9.82067	10.0705
ACOX3	8.44293	8.42812	8.21536	8.13035	7.29759	7.79687	8.25706	8.26873	8.35325	8.3087	8.61642	8.68849	8.8299	8.47213	8.51512	8.33408	8.32925	8.71601	8.04598	8.48278	8.35429	8.04916	8.43118	8.28622	8.32185	8.41713	8.12124	8.29893	8.40295	7.85743	8.57823	8.56513	8.3336	8.43986	8.23309	8.65637	8.26572	8.5004	7.66824	8.56789	8.16271	8.18698	8.21648	8.31011	8.11293	8.49259	8.47293	8.38361	8.09647
ACP1	3.84758	3.01904	3.34213	2.98814	1.34508	3.12078	3.12502	2.99427	3.01971	3.55782	2.82028	3.72368	3.92381	3.17827	3.40244	3.04009	3.36782	2.71446	3.32893	3.03291	2.74078	2.97616	2.85012	2.82024	2.92957	2.82812	2.91947	3.07673	2.99038	2.90156	2.94515	3.22822	3.03762	3.65724	2.95257	2.95539	3.38478	2.96827	3.82298	3.57602	2.9276	3.32867	2.91436	2.88648	3.17038	3.10959	3.24471	3.91404	4.65216
ACP2	8.11303	8.2286	8.52155	7.98716	8.304	8.96879	8.35627	7.74696	8.38031	7.97064	8.33491	7.44537	8.04093	7.9482	8.14139	8.73868	7.75142	8.5196	8.60581	8.22281	8.02561	8.99583	7.50338	7.74399	8.15375	8.90521	8.07657	8.00423	7.65079	7.72474	8.09481	8.15363	8.34757	8.08869	8.22007	7.98856	7.95521	8.27637	7.82859	7.70065	8.14068	8.36602	8.12022	8.24711	7.83626	7.42744	9.21028	7.88241	8.15406
ACP5	14.9763	14.0652	15.2556	15.006	15.8123	14.7365	14.7345	13.5549	14.0618	13.6659	14.7645	13.2743	14.5123	14.4997	13.869	15.4905	14.4695	15.1673	14.3998	15.1378	14.0954	15.9691	13.5071	14.4396	13.0811	15.5009	12.6002	13.5919	14.3794	13.1445	14.1204	14.2576	14.6019	14.5572	14.6065	14.6541	14.7369	14.7703	14.5482	12.6536	13.8071	14.1663	14.7287	14.5212	14.6474	13.9602	14.7661	14.7556	14.4575
ACP6	7.56539	7.42631	7.35126	6.95699	5.91781	7.07013	7.29492	6.93817	6.78877	6.85683	7.08838	7.15624	7.93166	7.17848	7.05279	6.65225	7.46025	7.23228	6.75729	7.36967	7.32529	7.52199	7.10971	7.13788	7.48186	6.94622	6.92723	7.35229	7.54583	6.97159	7.61027	7.24189	7.59362	7.60924	7.47991	7.55781	6.73148	6.68255	7.257	8.07399	7.17673	7.84611	7.50766	7.45733	6.85389	7.17129	7.35389	6.53581	6.86279
ACPP	4.49903	3.26924	4.15758	3.0898	3.09627	4.50773	3.65685	2.5898	2.39243	3.38719	4.14536	3.7548	4.36508	2.74404	4.56704	4.99969	4.0666	4.79869	3.83249	3.73014	3.70709	4.4745	2.6859	4.24285	2.27669	3.24048	4.35453	3.6582	2.96856	3.89828	2.75584	4.15758	4.14839	3.65298	3.26952	4.51117	3.71023	4.4883	4.74823	4.19222	3.74509	4.73342	3.74908	4.3986	3.38867	5.11853	5.44225	4.0119	4.49686
ACPT	4.07128	4.31842	4.5952	4.20127	4.89201	4.38923	4.33302	4.59905	4.60039	4.19728	4.69038	4.6129	3.87336	4.27614	4.64957	2.90658	4.36414	4.42191	4.7848	4.02597	4.16646	3.72498	4.72654	4.40857	4.99932	4.87276	5.31501	4.44467	3.79251	4.30271	3.41581	3.62062	4.02273	5.23705	4.56815	4.3465	3.93	4.20519	4.20232	6.28187	4.33692	4.58347	3.88279	4.45766	4.24198	3.41485	5.65485	4.45006	4.33264
ACR	5.92046	5.74283	5.94547	7.10356	6.19544	5.61347	5.89455	5.77267	5.65488	6.01325	5.65109	5.73208	6.0376	7.08863	5.57512	5.91449	5.57919	5.8901	6.14578	6.04177	5.70672	4.76143	5.58718	6.51258	6.00398	6.94016	6.25171	5.63535	6.49752	6.09721	5.81173	5.17441	6.00969	6.04159	5.90631	5.52114	5.6931	6.11414	4.63843	6.59835	5.33262	5.94516	5.13867	5.67093	6.28811	6.37186	5.96091	5.30365	6.27728
ACRC	8.27094	9.00833	7.97149	8.05488	7.81501	7.82385	8.8482	9.38017	8.69803	9.04895	7.65852	8.82293	8.17039	8.11637	8.10626	8.87503	8.60383	7.9531	8.88863	8.27876	8.58007	7.9867	8.2689	8.91631	8.26481	8.97019	8.96877	8.33945	8.18892	8.97262	8.43331	8.1568	8.33272	8.27881	8.09146	7.80014	8.53069	8.92755	8.45764	8.25362	8.27965	8.17154	8.52228	8.0106	8.06847	8.80585	8.48601	8.83051	8.29277
ACRV1	1.75921	4.4089	1.76914	1.9542	2.66866	1.94176	1.92544	1.95256	2.05072	2.15725	3.66787	3.92033	2.36178	2.01867	1.85439	2.02654	1.56867	1.79454	2.04321	2.43336	1.83387	2.16085	1.8738	2.06675	2.06675	2.0249	2.65627	2.16639	2.03558	1.93659	1.90982	1.79897	1.93424	1.86132	1.95784	1.96007	1.4846	1.75471	2.58975	1.75971	2.1993	2.74758	2.14126	2.07985	1.87389	2.06623	2.15253	2.18212	2.21336
ACSBG1	5.67488	3.66734	7.08198	4.91616	6.61414	6.33298	6.55434	8.17727	5.58303	5.63157	5.46932	8.53489	7.9184	4.96174	7.45044	4.53984	3.87878	5.47542	6.49677	7.26324	8.34453	7.82141	6.82517	3.04291	5.69465	4.68628	3.91461	6.59618	6.89075	3.95453	7.39143	6.2283	7.47654	7.27629	8.31161	7.42348	4.07025	4.77479	6.83314	7.90403	7.59522	8.05395	7.39361	7.21632	6.09406	7.08956	5.4959	6.54753	4.05231
ACSBG2	5.06487	3.80782	4.12441	3.7383	3.93165	3.62982	4.18165	3.49557	3.61959	3.63773	4.06462	4.06304	4.04937	4.52509	3.78393	3.83488	3.40964	3.96818	3.18646	4.24387	4.7659	3.36039	3.21172	3.29131	2.6166	3.737	3.2857	3.60838	3.33861	3.54101	4.93569	3.30261	3.90244	4.73988	2.13404	4.58183	4.0177	2.86022	2.19771	3.95085	3.38833	2.78877	2.88471	2.82011	4.77027	4.54564	2.68912	4.18205	4.3811
ACSF3	7.7434	7.87635	7.85248	8.1714	10.1876	8.31459	8.25227	6.91445	7.91816	7.32355	8.63667	7.56156	7.55959	7.74578	7.68069	8.07831	7.49503	8.0746	7.68424	7.63221	8.1645	8.30029	7.98881	7.47592	7.60524	7.72463	8.31064	7.77339	7.30536	7.77181	7.80356	8.54358	8.1284	7.73039	8.01421	7.53789	7.59188	8.9779	8.15613	7.9707	7.86626	8.26275	7.47828	7.72211	7.65998	6.59947	8.28639	7.93157	8.06766
ACSL1	10.9187	11.3391	10.8365	10.0724	9.44736	10.8408	10.747	12.3868	10.8395	11.6986	11.4063	11.3554	10.5925	11.1384	10.2801	12.075	10.2771	11.3589	11.6568	11.0231	10.3493	11.3224	10.4433	10.9346	10.5895	10.8532	11.1771	11.0276	10.4195	10.5419	10.5264	10.6738	10.8886	10.7755	10.6255	10.3656	10.5326	11.9586	10.6048	10.8906	10.5186	10.7768	10.7405	11.0425	10.5786	10.5776	11.534	11.9054	10.5699
ACSL3	9.6783	9.45366	9.23328	9.73109	8.12796	9.55887	8.75216	9.74947	9.40983	9.69386	9.2507	9.72377	9.19869	9.51095	9.07847	9.41883	9.75802	9.45235	8.94384	9.61669	9.46248	9.29084	9.19286	9.35122	9.25963	9.05567	9.14152	8.91778	9.38809	9.57436	9.32912	9.19209	9.25442	9.57052	9.58385	9.45715	9.71689	9.5513	9.80615	9.93306	9.15152	8.86548	9.63837	9.49294	9.47324	9.21659	9.13468	9.61556	9.88434
ACSL4	9.50834	9.63606	9.79152	9.61446	10.7385	9.50759	9.01069	10.7364	10.0235	10.1956	9.69993	9.6173	8.83417	9.47299	9.5113	9.82929	9.76954	9.439	9.94205	9.89711	9.13814	9.64187	9.38948	9.88416	9.22804	9.37281	9.34407	9.30095	9.6745	9.43849	9.41338	10.0577	9.69982	9.6828	9.51283	9.71816	9.86181	10.6172	9.32656	9.34507	9.21776	9.49662	9.54596	9.30761	9.82962	8.52066	9.66511	9.87656	10.2068
ACSL6	4.22347	4.13984	4.92728	4.91642	4.69154	4.4239	4.21024	4.75002	5.48022	4.35273	5.94632	4.15849	4.12868	4.71811	3.69449	4.51213	3.61763	3.41239	4.45181	4.0401	4.47379	3.501	4.50263	4.52395	4.85848	5.10243	4.08451	4.0897	4.44224	5.96547	4.68033	5.27693	4.14125	3.90984	4.23955	3.81144	3.94712	4.25969	4.3111	5.64541	4.81851	4.07335	4.35633	4.27155	4.8559	4.87494	5.28082	4.04842	4.74334
ACSM1	5.0411	4.36594	5.22178	5.18224	6.5993	6.37762	5.07306	7.2924	4.09625	6.57725	5.65452	4.82235	6.76794	4.73374	5.10328	6.03155	5.72293	5.64462	7.1874	5.32508	6.38743	6.65073	4.52866	5.55197	4.14433	5.12922	5.46756	4.8681	6.54852	4.3581	5.3556	5.30149	5.08378	5.39363	6.19548	6.38673	5.45248	4.88206	5.99221	7.06474	4.92091	6.9098	5.67828	5.25692	6.12198	5.51802	5.85627	6.1073	5.00953
ACSM2B	5.10981	5.11371	5.17545	4.84794	5.60612	5.09315	4.92082	4.26228	5.29966	4.82386	4.46007	4.7929	5.38006	5.10869	5.42267	5.24433	4.38058	3.9907	4.91581	4.83292	5.36621	3.6845	5.11308	4.66353	5.76368	6.05346	5.18428	4.69085	5.21455	6.04141	5.86948	5.18117	5.5539	5.44873	5.34598	5.2349	5.13963	4.61486	4.93971	4.62568	4.91031	4.60075	4.40587	5.30698	4.65716	5.84633	4.15251	5.54628	4.75771
ACSM3	7.02699	7.57942	6.85151	6.41554	6.4647	6.64737	6.46225	5.54959	6.74324	6.48123	7.43081	5.31295	6.16095	6.73362	6.41725	7.65601	6.64554	7.20546	7.83867	6.62548	5.76948	6.15712	6.36237	7.56709	5.10208	6.46633	5.82588	6.3715	6.22754	5.74839	6.70818	6.89298	6.7893	7.12074	6.17335	6.30021	6.96734	6.71117	7.02903	5.90654	6.23077	6.30298	6.48374	6.61242	6.49837	5.70104	6.69546	6.71844	7.14661
ACSS1	11.5567	10.8662	11.2536	11.3084	12.319	11.1293	11.3209	11.2247	11.0985	11.0963	10.909	11.0954	11.4823	11.1385	11.0766	11.579	11.2837	11.399	11.352	11.4591	11.5059	10.7313	11.5503	10.4422	10.9371	11.2761	11.042	11.3274	11.1633	11.2476	11.6794	11.1559	11.1459	11.4616	11.2201	11.5719	11.8864	11.1224	11.0057	11.4301	11.5922	11.2675	11.4821	11.2443	11.2786	11.1573	10.7553	11.4488	11.3836
ACSS2	10.6398	10.3225	10.5698	10.3695	10.6395	10.3504	10.1043	10.1584	10.5156	10.1599	10.8111	9.66368	10.2393	10.2665	10.1663	10.645	10.1269	11.2435	10.7641	10.4138	10.0893	10.2134	10.2713	10.1399	9.92737	10.1588	9.76429	10.2801	10.4149	9.57911	10.6086	10.4583	10.1689	10.0609	10.1297	10.5302	10.4047	10.2557	10.7163	10.2621	10.7472	10.3193	10.4973	10.3804	10.1523	9.90108	9.98193	10.8209	10.6517
ACSS3	8.99684	9.04397	8.46873	8.82217	6.53373	8.17868	8.12331	6.94951	8.16793	7.53001	9.08664	7.40499	7.41288	8.89618	7.77272	9.66157	8.71142	8.8848	6.79401	8.31974	7.19863	6.05213	8.1957	9.01372	7.38919	8.49505	7.28119	8.25309	8.33363	7.57409	8.71116	8.63348	7.78986	8.42179	7.78687	8.30887	9.235	9.12125	7.62688	7.63462	7.74718	7.53224	7.56875	8.39649	7.90237	7.25616	8.04141	8.2599	8.66776
ACTA1	4.20764	4.55578	4.58657	5.24135	6.82975	6.40958	4.8941	4.83765	4.14469	4.87571	5.96741	7.29334	4.08699	4.62436	3.6675	4.52054	4.79857	6.21744	5.95909	7.32233	5.20299	4.32431	6.57367	6.16508	4.27077	3.61302	4.42227	5.90254	5.27369	4.3375	4.74474	4.43194	5.21733	4.26659	5.15552	5.624	5.51968	5.59498	4.55005	4.81308	5.53556	4.8723	5.7593	4.63814	4.7878	4.56829	4.28133	4.45299	4.41797
ACTA2	12.8584	14.7229	13.0214	14.0563	13.4752	13.105	13.1903	13.9907	14.4472	14.1877	14.2281	14.4831	14.039	13.8807	14.5525	12.3792	13.8052	13.8871	12.7905	14.3157	14.1477	13.6506	14.7396	13.9114	14.8136	13.8449	14.0508	14.7291	14.7078	14.1221	14.0972	14.4737	13.9654	13.9756	13.4971	13.9946	13.4419	13.5491	13.8449	12.368	13.0893	13.2377	13.9202	13.1832	14.0743	13.8595	12.6021	14.183	13.5714
ACTB	14.4191	13.6382	14.1672	14.6816	14.5479	14.1053	13.9566	13.8689	14.5249	14.7134	14.3302	13.683	13.8551	14.3029	14.4823	15.2298	14.5803	14.9252	14.3994	14.6258	14.1475	14.0611	14.5165	14.5713	14.3111	14.8881	14.0839	14.3962	14.0603	14.0127	14.7284	14.8748	14.4459	14.4254	14.758	14.4893	14.5524	14.4961	14.2848	14.0409	14.1029	14.5497	14.4611	14.1414	14.3226	14.2522	14.7458	14.6455	14.6192
ACTG2	12.9866	15.4999	13.9421	13.699	14.6744	13.7254	13.632	14.8584	15.4966	15.3002	15.3853	15.9101	15.8425	14.0881	15.1378	12.3181	13.2117	14.0078	13.0294	15.1468	15.1427	14.1869	15.7079	14.4121	15.7541	14.8415	13.7436	15.5242	14.4575	14.4964	14.654	15.275	15.0992	14.8631	14.3448	14.1691	13.5223	13.6218	14.3764	13.5614	13.8611	13.8164	14.5092	13.7203	14.652	14.6082	12.851	14.8353	13.9293
ACTL6A	10.3648	10.4424	10.2521	10.0407	9.93261	10.0887	10.49	10.531	10.636	10.1083	10.2785	10.4894	10.3223	10.2434	10.6296	10.573	10.5594	10.5724	10.5174	10.4191	10.5178	10.6922	10.3823	10.3414	10.5923	10.326	10.5406	10.2538	10.3127	10.406	10.3757	10.383	10.5331	10.4014	10.6692	10.522	10.516	10.1206	10.4487	10.4945	10.5753	10.5853	10.4326	10.4221	10.394	10.54	10.2523	10.4591	10.2384
ACTL6B	4.41969	4.01526	5.78721	5.4554	5.72525	6.42416	4.7612	5.25719	4.42436	5.21758	5.29803	5.77546	5.07064	4.77481	5.95297	4.22289	5.37782	5.24555	4.74433	6.30684	4.42147	4.1615	6.00859	5.96894	5.3885	4.84771	6.96155	6.22204	5.73854	6.9361	4.38893	4.77435	4.74414	5.18559	4.23902	4.48076	4.73398	5.31621	4.28085	5.25003	4.34561	6.13384	4.48348	5.76912	5.62098	5.14112	4.93359	2.34521	3.89257
ACTL7A	3.34896	3.34597	3.59324	3.85185	4.17222	3.78119	4.13132	5.63948	4.39184	3.95824	3.96932	4.06401	3.94778	2.81034	4.2106	3.56126	3.53826	3.67046	5.69137	3.28606	2.87452	3.33654	5.30972	4.33969	4.76227	3.80201	6.13658	5.21667	3.63546	3.82542	3.04329	3.9225	4.99819	3.62311	3.47758	3.59085	3.21165	3.70427	3.70142	3.7133	2.07835	3.67242	3.51419	4.95357	3.81613	4.22372	1.96071	3.40482	2.41387
ACTL8	3.32953	3.57635	3.93586	2.77432	5.94354	2.0875	2.42387	2.14881	4.27733	2.97143	2.65569	3.54573	4.32778	4.33232	2.77399	3.61036	3.0195	2.95313	3.9138	2.78124	3.43555	2.53085	2.85846	3.67714	2.41847	4.17014	2.97798	2.29793	3.15625	2.02098	2.5027	3.61868	2.4201	3.49195	2.51345	4.12522	2.40197	1.94027	3.82987	3.46059	3.69192	3.74022	3.70607	2.48074	3.75049	2.42332	2.56877	2.17176	3.30659
ACTN1	11.5597	12.4612	11.6801	12.1046	10.9782	11.8783	12.1958	12.3508	12.2941	12.2371	12.5284	12.5533	12.0071	11.661	12.0889	11.2645	12.2175	12.1412	11.7473	12.2602	12.2333	12.2484	12.7422	11.6752	12.9228	12.2734	12.4199	12.5833	11.7848	12.3021	11.8545	12.616	12.1399	11.7809	11.8843	11.8773	11.443	12.1948	11.8054	11.7303	11.96	11.974	12.0058	11.5931	12.0223	11.512	11.6616	12.3391	12.1711
ACTN3	6.58474	7.09808	6.68425	7.00352	6.99523	6.8171	7.19959	7.23798	7.27059	6.80419	7.58033	7.5043	6.65101	6.99787	6.98219	6.13792	6.84135	6.92742	6.36436	7.00054	7.06261	7.3177	7.80091	7.2387	7.9818	7.17446	7.63866	7.74052	7.14163	7.23948	6.81835	7.51785	7.21439	6.74346	6.46371	6.67823	6.84856	6.63391	6.63214	6.63952	6.63967	7.00244	7.00434	6.68889	7.07653	6.08247	7.07703	7.2657	7.09823
ACTN4	10.594	10.0893	10.2589	10.9163	10.8523	10.6228	10.2632	10.1271	10.0873	10.5946	10.5596	10.0039	10.0663	10.0403	10.0659	10.2795	10.1493	10.654	10.0739	10.1938	10.1387	9.72766	9.75763	9.10574	10.3753	10.0211	9.965	10.3088	10.5664	10.1227	10.2257	10.2163	10.0488	10.0937	10.1838	10.7567	10.063	9.98048	10.1387	10.1031	9.90476	10.217	10.1879	9.90755	10.5158	9.75631	10.0141	9.94011	10.4029
ACTR1A	10.2479	10.5	10.064	10.485	10.8942	10.375	10.2522	10.2248	10.099	10.62	10.668	9.78279	9.97334	10.0028	9.86788	10.1852	10.2155	10.6632	10.2536	10.1895	10.0463	9.94019	10.2018	9.92197	10.4067	10.2123	10.2076	10.238	10.0614	9.91502	10.325	10.5246	9.94982	10.1555	9.84483	10.3762	10.0858	10.1353	10.0068	9.65703	9.83959	10.0071	9.94448	10.0752	10.2147	9.63288	10.1668	10.149	10.5001
ACTR1B	10.7575	10.3967	10.7891	10.7225	9.8805	10.7808	10.6399	10.4277	10.7289	10.5814	10.6618	9.65095	10.8577	10.0905	10.9505	10.5647	10.4752	10.6231	10.6079	10.6391	10.8974	10.6969	10.2719	10.062	10.6111	10.4648	10.4642	10.4352	10.5681	10.4856	10.8175	10.8536	10.7612	10.752	10.7273	10.8047	10.4077	10.4041	10.7976	10.9821	10.7631	10.5956	10.5942	10.5203	10.3975	10.1161	10.6844	10.5335	10.6969
ACTR2	10.8851	10.6738	11.0457	10.8693	9.57725	11.0331	10.7182	10.7566	10.345	10.9044	11.085	10.8727	10.4878	11.1179	10.5156	10.7464	11.2479	10.678	9.97325	11.027	10.4086	11.0277	10.8736	11.0021	10.6535	11.2642	10.5434	10.6923	10.7608	11.1085	10.1927	10.803	10.7401	10.7245	10.6641	10.5316	11.1423	10.5061	10.303	10.289	10.7918	10.4803	10.8229	10.8981	10.9828	10.6162	11.1627	10.8359	10.928
ACTR3	12.0576	12.2438	12.4371	12.3176	11.1435	12.1661	12.1187	12.5223	12.2619	12.561	12.2395	12.2255	11.7507	11.6303	12.1738	12.6673	12.6174	12.5016	11.9713	12.5429	12.1925	12.7457	12.3549	12.3198	12.2426	12.3738	11.9879	12.0729	11.5822	12.4979	11.6956	12.5868	12.225	11.8672	12.5553	11.9266	12.4208	12.4533	11.9066	12.1519	12.2127	12.4409	12.3832	12.3274	11.9152	11.819	12.7862	12.2119	12.2447
ACTR3B	6.94315	7.20843	6.85185	6.46285	7.42482	6.85891	6.73459	7.02347	7.13783	6.96297	7.71823	7.27335	6.84729	6.99581	6.62631	7.39602	7.12589	7.4094	6.80857	7.15342	7.19053	6.93431	6.46475	6.18698	6.36863	6.27816	6.8271	6.39094	6.8123	6.20674	6.90274	6.67152	7.07007	7.19315	7.15871	7.42049	7.06576	6.12617	7.15716	7.13583	7.42154	7.14199	6.85008	7.18236	6.98544	8.21828	6.57389	6.56961	6.92833
ACTR5	7.45857	7.26205	7.61327	7.56548	8.00707	7.49169	7.59931	7.83275	7.74363	7.90635	7.58758	7.63431	7.30572	6.98209	7.56823	7.85908	7.74315	7.57586	7.90697	7.5523	7.67087	7.68697	7.76534	7.33627	7.43319	7.75447	7.65968	7.71075	7.64213	8.22034	7.80463	7.62236	7.77767	7.48164	7.64657	7.9537	7.75568	8.00534	7.59843	7.54988	7.49141	7.53652	7.67354	7.39833	7.43005	7.40943	7.65916	7.76276	7.59223
ACTR6	10.3515	10.2085	10.112	9.96764	9.0404	10.0207	10.1159	10.424	10.5364	9.96473	9.67621	10.8775	10.5019	10.1012	10.3747	10.3167	10.5451	10.0468	9.96416	10.3584	10.5421	10.2616	10.078	10.3398	10.0051	10.062	10.0664	9.9907	10.2604	10.0574	10.2779	10.1714	10.2417	10.3686	10.3528	9.76948	10.578	10.3327	10.1329	10.5005	10.7071	10.1758	10.3962	10.1729	10.0361	10.2602	10.0377	10.3886	10.3798
ACTR8	7.56301	7.57599	7.40702	7.54484	7.79911	7.35705	7.27519	7.60905	7.22667	7.41407	7.48269	7.7063	7.24432	7.23101	7.07316	7.40289	7.28877	7.58587	7.01328	7.67646	6.92938	7.10957	7.31176	7.31781	7.48416	7.44622	7.59811	7.45915	7.20674	7.50365	7.53627	7.25227	7.10031	7.42385	7.24618	7.28665	7.15492	7.06153	7.53968	6.92364	6.95385	7.0804	6.94606	7.33909	7.39494	7.89388	7.44429	7.39587	7.30368
ACVR1	9.3947	9.64699	9.48842	9.29204	8.66477	9.14059	9.58857	9.74549	9.54207	9.20373	9.56565	9.46294	9.69151	9.49703	9.66502	9.50507	9.79934	9.61426	9.44773	9.4805	9.73296	10.1205	9.48864	9.97138	9.68473	9.24891	9.61986	9.55235	9.53559	9.28958	9.33429	9.5898	9.78618	9.81859	9.97384	9.5718	9.53608	9.60433	9.7576	9.82828	9.58794	9.8197	9.69244	9.55772	9.47925	9.6145	9.0733	9.38034	9.34859
ACVR1C	3.51249	2.23978	3.5435	2.84253	3.44393	2.94377	5.16516	2.08032	4.4631	2.79936	2.80427	2.19749	2.01159	3.67932	3.15784	3.90976	2.67683	4.0278	2.78692	3.93054	2.15958	1.96849	3.50136	3.7656	4.6477	3.086	3.17909	2.75516	2.03468	3.5926	2.67897	3.29387	3.52161	3.10636	2.78974	2.13115	2.70833	4.09902	2.75709	4.31923	1.89562	3.02842	1.82228	3.47381	2.32398	3.08869	2.23608	2.95504	3.46438
ACVR2A	6.90486	6.78502	6.81034	6.68245	5.79782	6.55291	6.63896	7.10476	6.57986	7.03589	6.94224	6.9069	6.75183	6.98775	6.72512	6.78705	6.94031	6.64734	6.95785	6.62487	6.68842	6.81928	6.74834	6.84065	6.82181	6.90387	6.61603	6.70491	6.62548	7.13679	7.05477	6.77453	6.67702	6.76732	6.80656	6.64747	6.70625	6.69741	6.91532	6.44756	6.91874	6.84175	6.74669	6.99756	6.89981	7.01789	6.72217	6.74521	6.87901
ACVR2B	8.02037	7.11593	7.62097	7.78586	7.91083	7.71591	7.61063	7.68851	7.65991	6.49688	6.5958	7.93891	8.00725	7.58263	8.05362	7.69353	7.69366	7.35316	7.47384	7.66717	7.93861	8.12034	7.63243	7.76206	7.65605	8.14481	7.7683	7.59267	8.08734	7.70126	7.84035	7.14507	7.58494	8.00113	8.1614	7.88371	8.3908	7.48277	7.47838	7.49666	7.90207	7.98595	8.03541	7.83212	7.91301	7.90729	6.93883	7.84056	7.73598
ACVRL1	12.7809	11.9356	11.1595	13.2133	12.3786	12.706	11.3719	11.2606	11.7176	13.5169	12.2906	10.9545	10.8752	13.0134	11.0417	12.7158	12.2026	13.1731	11.126	12.0615	11.0864	10.3354	11.5925	11.4849	11.8296	11.538	11.3916	11.797	12.5001	11.5811	12.3048	12.1119	11.2152	11.9249	11.6836	12.7384	13.1407	11.9597	11.7665	9.90542	10.5053	10.289	11.4276	11.1885	12.2449	11.1295	12.1432	10.9572	13.7889
ACY1	8.59371	8.81714	8.73765	8.51432	10.2508	8.88523	8.91013	8.09897	8.80531	8.69553	9.23304	8.46572	8.77315	8.58841	8.78113	9.0539	8.96579	9.3243	9.22602	8.6226	8.66248	8.87141	8.75187	8.55928	8.77774	8.53331	8.81722	8.91013	8.64653	8.55863	8.77339	8.60973	8.69835	8.75564	8.87475	9.01209	8.37132	8.63349	8.9195	8.89047	8.88221	8.97189	8.73884	8.71943	8.64225	8.66023	9.10059	8.60627	8.57257
ACY3	2.80601	1.88815	3.72432	2.8222	3.62522	3.62162	4.63628	3.51735	4.25848	3.36125	3.08333	4.01961	4.84147	2.58934	3.52296	3.31137	2.82145	3.57742	4.04225	3.44923	4.46744	4.3397	3.83279	3.25382	3.46332	3.29167	3.94212	3.46989	3.06354	3.60695	1.83335	3.10942	3.90076	4.24026	4.24686	3.6485	3.36321	3.72141	2.9822	4.78354	3.74147	4.56284	4.13174	3.54187	3.10597	2.19303	4.03713	4.33794	3.1878
ACYP1	10.35	9.86129	10.72	10.1687	8.70411	10.308	10.8691	10.7385	10.0082	9.8738	8.98623	11.7046	11.421	10.0209	10.4396	10.3773	10.02	9.66944	10.0393	10.6894	11.2543	10.8043	10.311	10.0803	10.0104	10.4232	9.89579	10.2914	10.4862	10.4763	10.1829	9.66937	10.4589	10.6686	11.1672	9.77675	10.2892	9.83629	10.2909	11.3224	10.9517	10.7421	11.0531	10.5304	10.3486	11.0954	10.2878	10.6666	9.92373
ADA	10.2004	11.012	10.1601	10.3418	10.435	9.85569	10.6895	10.9354	10.867	11.7576	10.8875	9.9789	9.8969	10.6474	10.2309	10.6791	10.9864	9.90806	11.2576	10.3565	10.2302	9.6715	11.0221	11.2319	11.1616	10.968	11.1959	10.8772	9.68031	10.7788	10.1865	10.6326	10.9568	10.2973	9.72757	9.91036	10.3835	10.7316	10.573	9.33052	10.0338	10.3594	10.1335	11.0556	10.1605	10.306	11.763	10.8059	10.7629
ADAD1	1.77437	2.51449	2.04149	2.06444	2.43319	2.45959	2.04823	2.07928	2.14528	2.23158	2.95091	3.79901	2.32973	2.86674	2.01386	2.19225	2.16964	1.76099	2.14792	3.78073	2.07948	2.19642	3.09918	2.3289	1.99692	1.91313	2.521	2.74245	2.14031	2.10271	2.06356	1.98281	2.06434	2.0579	2.71784	2.08094	1.63053	2.18712	2.18356	2.1984	2.11087	2.40857	1.9647	2.43518	1.99931	2.18073	2.29829	2.06053	2.46574
ADAM10	8.80891	9.22292	9.50695	8.49446	7.33743	9.11364	9.33612	8.5747	8.61088	8.64995	8.81865	8.51829	8.84435	9.41249	8.63921	9.05661	9.05619	8.72291	8.57282	8.79369	8.47507	10.1059	8.25557	9.3808	8.49611	9.79419	8.66878	8.66716	9.11189	8.07194	8.16391	8.68488	8.69274	9.02816	8.92833	7.97087	9.33212	8.57407	8.58836	8.22057	8.39316	8.9147	8.60636	9.12062	8.72256	8.92284	8.97612	8.69112	8.87156
ADAM11	3.42052	2.44259	3.70536	4.09497	6.25035	1.98961	3.48487	2.5331	3.40103	2.9284	3.07243	3.65887	2.7126	3.03	4.06135	2.96369	2.36907	3.18704	2.13633	3.00405	3.6386	3.08289	5.4561	3.82796	3.57748	2.60224	3.45063	3.19663	4.242	3.29593	4.16065	3.77052	3.56871	3.90976	1.88845	2.18551	2.48736	2.58614	4.01241	2.59353	3.30354	2.78315	2.88437	3.27746	2.82902	4.00989	2.37881	3.8695	4.25455
ADAM12	2.92266	4.13232	3.52179	2.41657	2.88686	2.33243	2.30266	2.34181	2.45735	2.34606	3.24708	3.3966	2.01029	2.42391	2.35065	2.84664	1.63011	3.04595	2.4462	2.99011	2.25135	4.33865	2.41477	2.51687	3.83961	3.04975	1.79471	3.50657	2.45531	2.35486	2.30497	3.37689	2.73586	3.30879	2.38966	2.36152	2.04494	2.55434	2.55104	2.56481	2.50737	3.32668	2.10568	2.99276	2.24163	2.88959	2.67537	2.32713	2.43356
ADAM15	8.62855	8.79365	8.81315	8.68904	8.81543	8.64391	8.64899	9.09312	9.08339	9.48483	8.74943	9.00828	8.83074	8.5845	8.39767	8.82222	8.24376	8.44992	9.11978	8.55711	8.67301	8.33176	8.08276	8.11956	8.92743	8.8584	8.39734	8.74645	8.20553	8.88925	8.64778	8.44889	8.83693	8.98228	8.54866	8.63317	7.9531	8.45938	8.36625	9.27915	8.29917	9.10125	8.75624	8.69446	8.36017	7.95	8.81459	8.44524	8.48384
ADAM17	9.28301	9.12659	9.39909	9.39919	9.02982	8.92769	9.13014	9.48342	9.20661	9.73906	9.63867	8.40909	8.87105	8.75766	9.12594	9.73601	9.14932	9.0488	9.4871	9.36934	9.00706	9.3003	9.0098	9.4057	8.59798	9.79929	8.69692	8.77591	8.95003	9.05021	8.79542	9.54489	9.56147	9.50535	9.25066	9.03773	9.70691	9.85287	8.37766	9.28831	8.97112	9.06303	9.26615	8.79856	8.84168	9.11021	8.81241	9.38944	9.39416
ADAM18	3.17919	1.90172	1.88738	1.79456	2.12404	1.77978	1.79747	1.82979	1.75945	1.87556	1.79165	1.62964	2.03651	1.77309	1.76526	1.8082	1.62539	1.72704	1.77473	1.68962	1.73289	2.43596	1.75297	1.69725	1.7557	1.81085	1.65843	1.60009	1.84886	1.77233	1.72473	1.71589	1.7981	1.77095	1.78559	3.02011	1.76487	1.63414	1.6323	2.18766	1.81368	1.66275	1.80576	1.75781	1.80075	1.80024	1.81742	1.80239	1.82083
ADAM19	3.18074	3.47185	3.51709	3.36513	3.87639	3.30842	3.36492	4.30037	5.89752	4.24629	3.64884	4.29434	2.88492	2.79762	3.46164	3.42058	4.03572	4.05246	3.65529	3.96114	3.55161	2.92003	4.24486	3.35964	4.73822	2.99755	3.60418	3.37148	3.05995	4.77995	3.88048	3.91074	3.7591	2.54291	2.52958	2.65921	3.19085	4.89746	4.91395	4.16518	2.02122	4.01617	3.66456	3.2718	3.69106	2.87889	4.13477	3.08333	3.51455
ADAM20	4.75882	4.15638	4.36839	4.77708	5.32346	4.66335	4.81954	4.65301	4.87834	4.54734	3.09881	4.66055	4.72679	3.5193	4.49605	2.53462	4.03862	4.54318	4.30486	4.6081	4.85304	4.14257	5.09049	4.79233	4.92249	4.30562	4.68927	5.54929	4.15583	5.07765	5.55539	4.91895	4.64546	4.14423	4.8824	4.91354	4.75542	5.44305	4.26547	4.27858	4.35083	3.8208	5.16417	4.5857	4.43977	4.26173	5.92858	5.04477	4.71538
ADAM21	3.42061	2.5542	1.82464	3.7848	2.82436	2.77597	2.36646	3.09545	2.04372	2.49666	2.48514	3.14353	1.93741	2.07669	3.28884	2.8044	2.52796	4.75485	2.05492	2.17458	2.86943	1.88635	2.83711	1.62272	2.9539	2.80479	2.86401	3.11383	2.34755	3.79156	1.85318	4.21418	3.05138	3.81587	1.995	1.99088	2.45791	3.06725	2.77296	3.27924	2.43333	1.74631	2.69662	2.23415	3.52725	2.12921	2.91325	1.91278	2.03822
ADAM22	4.20724	2.17642	3.37957	4.26257	3.86022	3.765	3.92232	3.87725	3.94027	3.2635	4.14868	5.03408	3.56458	2.22022	3.76325	4.18303	3.72691	3.50954	3.35736	3.88189	4.13495	3.28998	3.82523	4.34181	4.61489	3.88369	4.15273	4.15601	3.15125	5.56579	3.10989	4.0116	4.24922	3.66008	4.07254	4.12932	3.58952	3.50036	3.49748	3.50948	3.81454	3.9472	2.96889	3.57792	3.3659	3.4881	4.77086	3.90832	3.54816
ADAM23	6.38773	7.85336	6.69768	6.59225	5.51925	5.41434	7.58808	6.58011	8.54098	5.79842	6.63729	7.24019	7.00204	7.17799	7.06022	5.98132	6.64928	6.2008	7.43169	6.33269	7.08706	6.39686	7.73458	8.98964	7.67095	8.07404	7.15783	6.81104	6.15477	8.36593	7.29195	7.37471	7.3702	7.8155	6.72747	6.90072	5.73597	7.1216	7.33719	4.32807	7.50305	6.51801	6.79318	6.46966	6.98599	7.22313	7.47162	8.07903	6.47377
ADAM30	1.69729	2.53424	1.92649	1.98758	3.39117	1.96259	1.98758	1.99061	2.01128	2.15765	2.03746	2.68737	2.05519	2.01054	1.94725	2.10801	2.14372	1.76109	2.03957	6.10379	1.78899	2.35788	1.90617	4.14532	2.25502	2.08132	2.85942	1.85383	2.05923	1.98391	1.91767	1.905	2.0122	1.9783	2.05142	2.01192	2.63963	3.21548	1.77647	1.78523	2.48742	1.70845	2.02382	2.05032	1.9478	2.05308	2.15531	1.98207	1.96801
ADAM32	3.16346	2.87383	2.67973	2.21717	4.11256	3.74162	3.40506	3.91298	4.58845	3.28559	3.27641	4.17818	3.77857	4.04592	4.7079	3.39284	3.07905	3.66419	3.16292	3.61243	3.75437	3.82206	3.48496	3.36247	3.47604	3.89619	6.69814	3.53839	3.72969	4.17622	3.78052	3.17749	5.121	3.55168	4.00897	4.11571	3.40843	2.86319	2.9265	4.31012	3.6408	5.13993	3.60938	4.21327	3.06214	4.65238	2.67827	4.04397	2.11961
ADAM33	9.33199	10.307	8.55627	9.20437	9.23961	8.63637	9.21779	9.6773	9.45312	9.24263	8.77189	9.37829	9.12892	9.51009	9.37271	8.32528	9.04887	8.50264	9.37643	9.44045	9.78593	8.58345	9.97419	9.63887	10.441	9.51323	9.90335	9.56098	9.49368	9.91387	9.99067	9.46437	9.63168	10.1585	8.64649	9.19993	8.90774	9.73388	9.03525	9.09666	8.95858	8.85092	8.99818	9.58059	9.19972	9.54911	9.02942	9.4141	8.90256
ADAM6	1.7158	2.06925	1.92432	1.92732	2.25137	1.88237	1.91286	1.95612	1.85553	2.63808	1.81319	1.63039	1.81853	1.91572	1.84954	1.87247	1.62059	1.77011	1.89944	2.85367	1.81632	2.01067	1.823	1.8046	1.89537	1.92056	1.63091	1.59651	1.95481	1.8296	1.88563	1.79846	1.87025	1.85579	1.80055	2.07689	1.65076	3.06928	1.62721	1.63385	1.958	1.71383	1.91979	1.78231	1.9139	1.95703	1.93071	1.95182	1.96276
ADAM7	3.11644	1.81313	3.15868	1.89026	2.76393	1.83953	1.82784	1.89133	1.94918	2.28237	1.87314	2.15996	1.90292	1.96109	2.60333	1.9261	2.17947	3.65671	1.95067	2.89259	2.61124	1.80731	2.52116	2.0249	1.977	1.51376	2.37564	3.36244	1.88952	2.04415	1.88112	1.74659	1.80199	2.96502	1.84081	1.89016	2.04191	3.19175	2.22028	0.355975	2.13171	1.41128	2.62073	2.37489	2.73307	2.97714	2.07573	2.30662	1.87548
ADAM8	11.6286	11.8804	12.4397	11.9798	10.3902	11.8669	12.2935	11.9317	12.9175	12.3665	11.6594	12.5774	11.9139	11.9108	12.2032	12.2309	12.5519	11.3323	12.8095	11.9745	11.8912	13.2068	12.1672	12.1273	11.7177	12.4909	12.1452	12.2177	11.4246	12.3866	11.5409	12.4159	12.578	11.3221	12.3914	11.7791	11.4916	12.9267	12.3249	12.1487	12.1231	13.0163	12.8857	12.42	12.2004	12.4381	13.2116	12.0016	12.2828
ADAMTS1	8.33772	11.4538	8.61202	9.48518	8.85509	8.84219	9.12744	11.9188	9.44921	10.8339	11.0208	11.6508	9.60199	12.1002	9.20316	9.46997	9.78748	8.75169	10.237	9.38922	9.49829	8.80007	9.56819	10.4188	10.288	8.94365	9.74001	9.55169	8.79556	9.8466	9.65917	10.3615	9.12322	8.6008	8.35287	9.61976	7.87539	10.9953	10.2686	10.4088	10.1731	9.63053	8.59464	8.19953	10.2142	9.49995	9.25213	11.0834	9.32607
ADAMTS12	2.12004	2.51056	2.29206	2.58207	2.83557	2.34609	2.34948	2.49921	2.40872	2.10636	2.89703	2.59491	2.32538	2.91883	2.29158	2.37783	3.93506	3.24279	2.44845	2.89794	2.25409	3.5789	2.45858	3.98312	2.23337	2.69857	2.10236	4.04129	2.9748	3.49387	2.39031	3.18085	2.30369	2.32211	3.90538	2.67886	3.21097	4.14675	2.44465	2.45522	2.28382	3.30828	2.5011	2.30999	2.35178	3.17043	2.49388	2.41732	2.45378
ADAMTS13	8.76353	8.61018	8.71653	9.54813	9.91226	8.60257	8.35317	8.93058	8.68415	8.50107	8.45936	8.80717	9.2793	8.44278	8.55971	8.40173	8.21807	8.61408	8.87347	8.29084	8.85835	8.04977	8.86355	8.62567	8.49786	8.2043	8.92941	8.83411	8.90144	8.38088	8.96968	8.7568	8.84835	8.67833	8.75084	8.04032	8.28187	8.20907	8.20733	9.14307	8.76908	8.68585	9.32229	8.79435	8.54857	8.78322	8.73595	9.0611	8.37765
ADAMTS14	6.60629	9.41497	8.47762	7.86182	10.6074	8.02889	10.2065	9.34143	9.26995	7.07915	9.19216	9.57754	9.51104	8.69136	9.54256	7.66994	7.65088	8.74358	9.55649	8.29792	8.87214	9.51132	9.52289	8.78115	10.5188	8.96293	10.6106	10.0031	7.71071	9.01533	8.06081	9.35333	9.50616	8.16311	9.32841	7.56998	7.11936	11.0189	7.46938	9.52819	8.8937	10.0943	9.03216	9.73617	8.42749	9.13206	8.82111	8.61164	7.72373
ADAMTS16	4.80249	8.93643	5.36021	5.5057	9.86811	3.01684	7.32424	3.90363	6.08651	4.29567	7.54993	3.81053	4.97095	6.26377	4.69276	7.87309	4.83496	7.60184	5.10325	5.22695	3.83394	6.1523	6.09737	6.67091	6.62304	5.5709	3.91693	7.18599	4.00178	5.05025	4.70566	7.24623	5.8497	5.87322	4.83806	3.58931	3.45452	3.46757	5.65842	4.053	5.38877	5.30447	4.68435	6.40172	4.83816	5.57905	7.19691	7.23135	4.56492
ADAMTS2	5.20016	5.99417	4.46383	5.64947	6.83506	5.53634	4.76659	5.96738	5.46903	6.20682	6.47423	5.11172	6.22902	5.2082	4.26479	7.00876	6.3916	5.32921	5.00651	5.40753	4.80822	4.40625	5.55611	6.2042	5.73015	4.61843	5.57332	4.97815	5.53496	5.58584	5.89422	5.82335	5.19648	5.39461	5.144	6.12933	5.74782	5.66783	6.06847	5.00069	5.16846	4.71261	5.02398	4.97964	5.15835	4.36896	6.10153	6.34399	6.04399
ADAMTS20	1.73278	2.08673	1.88226	1.97049	2.76231	1.94968	1.92257	1.96859	2.04011	1.92653	1.94998	1.77023	1.95678	2.0102	1.90006	1.98039	1.72977	1.71281	2.0365	1.76912	1.82617	2.05126	1.85531	1.88557	1.96991	1.8816	1.83344	1.76673	1.96108	4.47372	1.97419	1.85865	1.91667	1.88096	2.25607	1.98409	1.85068	1.89237	2.86652	1.90163	2.10261	1.75585	1.94796	1.93378	1.92767	1.97449	2.03661	1.97279	1.98529
ADAMTS3	5.20597	6.54271	4.88555	5.90053	5.14725	5.04884	5.74025	7.44819	6.00731	6.52011	5.67225	7.36593	5.23677	6.26133	6.0675	6.2357	5.91788	5.4713	6.68478	5.26573	6.20095	6.50607	5.31308	8.04216	5.84215	5.22946	6.56284	5.45401	5.21058	6.54044	6.17339	5.81125	6.44046	6.0821	5.74315	5.17814	5.1971	6.75554	5.48874	5.1232	6.49268	6.50705	5.57268	5.17346	5.88593	6.45071	5.90711	6.3427	5.70391
ADAMTS4	5.9508	10.1798	6.24721	7.54976	9.79185	6.79595	9.04302	14.2321	9.52346	8.84849	12.8107	12.1132	11.6834	12.5696	8.83437	7.5233	7.37676	6.84383	13.0609	7.10473	8.71178	8.37943	8.06734	11.4707	9.64111	8.29604	9.94928	8.4931	7.1175	8.66686	7.20819	8.46435	10.1593	7.71153	7.13544	7.38166	7.99244	12.0339	7.13953	11.9396	8.37711	10.8883	8.12077	8.26988	8.9665	7.68516	9.06285	9.37329	6.45428
ADAMTS6	4.96695	6.26871	5.25959	4.95231	5.10809	5.14383	5.3282	5.26614	6.06365	5.26483	5.52868	4.92088	6.22938	7.02266	5.31923	6.02063	5.67186	5.71662	7.04039	4.78708	5.19708	5.23414	5.56142	6.50212	5.95412	6.19521	4.72523	5.6928	6.21305	5.30482	4.77409	5.64031	5.15269	5.90114	5.35862	4.15449	5.17398	6.11246	5.16685	4.23737	4.3518	5.65776	5.40449	5.52284	5.1676	5.65482	4.42188	5.58923	6.17477
ADAMTS7	11.6804	9.18108	12.3567	12.2258	14.0442	12.7354	11.7568	12.2811	9.88828	11.0726	11.6338	11.1779	10.8608	10.5035	10.9544	11.0858	11.5107	11.6596	12.1955	11.6115	11.162	11.0129	13.1351	12.9635	12.5623	10.4908	13.3058	12.8274	11.1668	12.1392	10.7845	12.097	12.1982	10.771	12.4472	12.2049	11.7973	11.0532	12.2593	9.64161	11.2879	12.5182	11.4592	12.3988	11.4455	10.1346	11.7337	11.1357	10.862
ADAMTS9	8.44454	9.97173	9.05124	9.00382	8.14354	8.87409	9.51358	12.8073	9.89869	11.4059	10.4422	11.3876	9.63689	10.6504	9.64797	9.17577	9.7999	8.99982	11.3231	9.02892	9.37913	8.85884	9.27142	10.7183	9.23937	9.81068	10.0383	9.68287	8.12813	9.72818	8.69361	9.16525	10.6209	9.44079	8.27193	8.60664	8.4726	11.0887	8.61539	10.1632	9.10448	9.69069	8.93896	8.9789	9.54405	9.18741	9.13245	9.54959	8.96239
ADAMTSL2	7.82029	9.23825	8.08856	9.44303	9.55212	8.41109	8.6184	7.79082	8.52006	8.93709	9.63334	7.85457	8.48665	8.83114	8.31429	9.10881	8.92562	8.6069	8.31441	8.25458	8.22527	7.12404	8.96612	8.69505	9.31425	8.16457	9.73499	8.58121	8.73764	9.0806	8.91272	8.68416	8.4229	8.16282	8.18383	9.14104	8.66121	8.81438	8.70058	7.08196	7.95805	7.83722	8.3893	8.0986	8.27545	8.65228	8.1032	9.29546	8.54296
ADAMTSL3	8.09193	5.41468	6.15859	7.71395	3.63236	7.46951	6.34406	5.49683	6.28567	7.12903	6.92408	6.13592	5.78019	7.68224	6.6746	5.37993	7.13738	7.12766	4.38466	6.6035	6.55363	4.62963	5.94815	6.0941	6.3593	5.54222	6.48477	5.57823	7.25724	6.90381	7.47386	5.92823	6.78623	6.49302	5.85999	7.15088	8.49685	5.46529	6.44074	5.59353	6.74388	4.57261	6.20018	6.86706	7.39704	6.57682	6.57179	6.74444	7.81527
ADAMTSL4	8.28045	7.53947	8.29148	8.26468	7.14476	8.41541	7.71899	5.86805	6.26433	6.27892	8.11195	6.75863	6.85776	8.43358	7.38119	8.36248	7.2807	8.51644	5.87437	8.01983	6.6278	7.58376	6.68169	7.47881	6.54319	8.91196	6.13132	6.4772	8.05823	6.49304	7.48984	6.93163	7.43656	8.36657	7.15281	7.27996	7.62546	8.12271	6.61648	5.75642	6.86097	5.61502	7.2209	7.92189	8.32615	6.96973	7.50014	7.90627	7.58985
ADAMTSL5	6.50342	5.87493	6.67398	6.88433	6.94681	7.06588	6.68304	6.25226	6.20175	6.69029	6.5595	6.49172	6.39894	7.48452	6.99892	6.1459	6.43726	6.51781	6.52247	6.34939	6.33499	6.02241	6.95242	7.12794	8.59234	6.35701	7.61063	7.44543	6.96096	7.22315	6.52463	6.51435	6.81161	6.87034	6.22387	6.78044	6.88243	6.9038	7.10228	6.33309	6.34434	6.36679	6.24165	6.84237	6.83763	7.35286	6.58336	6.14611	6.4373
ADAR	12.378	11.9808	12.2201	12.5829	11.1363	12.6286	12.1319	12.1178	12.329	12.3847	12.0779	11.9681	11.8874	12.0471	12.2403	12.3347	12.5067	12.3673	12.7691	12.2378	12.0749	12.046	12.073	11.9357	12.2185	11.9182	12.2269	12.1158	12.3323	12.3239	12.034	12.2056	12.3929	12.0303	12.2436	12.3289	12.3578	12.4038	11.8945	12.3027	12.2472	12.3649	12.2189	12.2236	12.3476	12.2111	12.5754	12.7595	12.2863
ADARB1	12.1643	11.3634	10.6481	12.2074	9.567	11.5474	10.5989	10.6121	11.4931	11.5925	11.0179	11.2123	10.962	12.1323	11.8593	11.4705	11.9954	11.1739	10.5478	11.6223	11.575	10.4539	11.7186	10.8098	11.5602	11.1458	11.3359	11.5752	12.5882	11.6386	12.154	12.3348	11.2033	12.0676	11.252	12.1387	12.4674	11.3534	11.7147	9.87309	11.0717	10.7909	11.492	11.1695	12.0038	11.9837	10.7208	11.8586	12.1164
ADARB2	4.73564	5.18216	4.5159	5.27281	6.21405	3.79429	3.38651	3.53503	3.92233	4.66464	3.41872	3.6906	4.85936	5.80753	4.71532	5.28225	5.15115	5.18914	3.54308	4.19064	4.29019	4.52738	3.28298	4.55684	3.33061	1.74946	3.50998	3.62678	5.05848	2.22481	5.49399	3.98545	3.77997	4.26817	4.46401	3.93565	4.73535	3.10401	3.10117	4.49807	3.97646	2.52552	3.58488	4.11478	3.79936	3.83495	4.52922	3.59527	4.95271
ADAT1	8.12938	8.31868	8.36543	8.41732	7.42767	8.0252	7.86756	7.49659	8.22242	8.28134	8.21013	8.09491	7.66308	7.42749	7.87113	8.71759	8.40841	8.30637	8.49908	8.48783	8.19357	8.20676	8.07183	8.53905	8.40194	7.92547	7.97601	7.87691	7.57196	8.19463	8.18591	8.38055	8.3187	7.96913	8.60336	8.30235	8.33315	8.64191	8.51401	8.28441	8.20229	8.61708	8.52128	7.88871	8.53462	7.27231	8.1291	8.42445	8.37305
ADCK1	6.42952	6.57244	6.74763	6.79167	7.14119	6.62636	6.65755	6.15505	6.62296	6.28412	6.46508	5.89754	6.19898	6.48047	6.18179	7.13852	6.4647	7.18651	6.89331	6.46281	6.42102	6.52669	6.1722	6.24876	6.45602	6.40052	6.28609	6.37681	6.43145	6.47527	5.99367	6.3507	6.61087	6.49543	6.3419	6.31802	6.41199	6.4699	6.23841	6.42428	6.10267	6.70473	6.17186	6.31092	6.79039	6.09998	6.84705	6.16619	6.44142
ADCK2	7.39903	7.03026	7.34315	7.33619	8.05691	7.16958	6.94463	6.40993	6.98055	7.0841	7.4755	6.4093	6.90415	6.42342	6.95917	7.68021	7.1776	7.14376	6.78425	7.14509	7.00288	7.55728	6.7663	6.63339	6.8744	6.89824	6.71024	6.75913	7.03744	7.03931	7.04647	7.23633	7.11893	6.85931	6.85152	6.89751	7.34001	7.07596	7.51403	6.52146	7.14314	7.27818	7.19134	7.07315	7.04854	6.82868	7.74239	6.95117	7.49439
ADCK4	6.60738	6.28414	6.73612	6.95815	7.94317	6.87369	6.71523	6.91799	6.40667	6.6845	6.88654	7.94293	7.24538	6.34724	6.74929	6.99396	6.26289	6.59542	6.96839	7.18328	7.17173	7.05071	6.41524	5.83062	6.61528	6.18443	7.24876	7.58398	6.55665	6.38577	7.07853	6.7445	6.73264	6.69324	7.54795	6.91527	6.39555	6.98436	6.52647	7.74395	7.19939	7.30482	6.87625	6.84866	6.23731	6.79043	6.71087	6.46762	6.5512
ADCK5	8.46878	8.58472	8.58123	8.59989	9.51257	8.72388	9.26902	8.71631	8.9518	8.745	8.60216	8.42785	8.89681	8.66889	8.78733	8.66801	8.85851	8.8804	9.25793	8.67212	8.95377	8.78796	9.04868	8.24194	9.04473	9.2774	9.23043	9.13028	8.87575	8.98523	8.92443	8.69765	8.76286	8.78291	8.89593	8.86351	8.72616	8.98938	8.68603	9.02473	8.40449	9.09421	8.94795	8.86338	8.73107	8.85405	8.99431	8.80889	8.37475
ADCY1	4.99351	6.10931	4.57126	6.76561	5.35416	3.91363	5.52484	5.84006	6.30815	4.98743	6.2103	6.62931	4.52771	5.8162	5.02914	6.23531	5.37392	5.73259	4.8992	5.97797	5.08111	4.77969	5.36118	6.96295	6.81276	5.64947	6.79812	5.6948	6.02482	6.46175	5.57444	5.73992	6.23865	4.91149	5.26287	5.36562	5.49353	5.0334	5.98976	4.50323	4.96019	5.75842	5.63083	5.88925	5.71793	5.63541	5.12136	5.13074	6.16216
ADCY2	2.03518	2.34128	2.24857	2.1368	1.69287	2.10701	2.12009	2.70926	2.11258	2.22084	2.59788	2.01842	2.22966	2.82557	2.07748	2.13201	2.08483	2.07638	2.1526	2.03983	2.12143	2.28879	2.12698	2.12173	2.19313	2.21244	2.18446	2.5054	2.14392	2.06751	2.11478	2.16465	2.10339	3.37368	2.09406	2.14703	1.69671	2.73233	2.17758	2.48441	2.25136	2.0335	2.21581	2.17307	2.12009	2.15351	2.66885	2.1359	3.70848
ADCY3	11.6599	12.1981	11.5804	11.5961	11.9388	11.6341	11.8221	12.0453	12.0269	12.0603	12.3305	12.0954	11.3419	12.0105	11.3874	11.492	11.8287	12.0695	12.1383	11.6577	11.786	11.7101	12.1367	12.5825	12.3526	11.865	12.4224	11.8555	11.4933	12.4071	11.5507	11.8653	12.1668	11.8763	11.7359	11.4463	11.7162	12.1304	11.873	11.2499	11.6037	11.5666	11.3951	11.5358	11.7141	11.5627	11.8012	11.7013	11.5055
ADCY4	10.9817	10.8254	11.1545	12.0513	11.312	11.6968	11.6119	10.4352	11.3236	11.6562	10.8117	11.4095	10.8292	11.3539	10.8861	11.082	11.2359	11.1915	11.7897	11.0174	11.2348	9.84713	10.7716	11.3181	11.9635	11.6983	11.3588	10.8722	11.6015	10.8263	11.1058	10.786	11.4483	11.0204	10.9493	11.0622	12.588	11.1047	10.9936	10.2331	10.5132	10.8548	10.7044	10.9533	11.0145	11.4347	11.0539	10.7073	11.6767
ADCY5	5.15342	6.39064	5.20622	5.91168	5.65432	5.39402	5.50236	6.39955	6.79559	5.92868	6.46908	6.53168	6.06795	5.91191	6.77526	5.56993	5.35519	5.43558	5.76027	6.4706	6.4247	5.92677	7.11016	5.89242	7.07078	5.61679	6.00651	6.41052	6.05017	6.7569	6.16578	7.59195	6.18322	5.62121	5.81825	6.15562	5.51507	4.98268	6.33601	5.92619	5.44934	5.52478	6.13008	5.52407	5.92069	6.0862	5.06832	6.5177	5.31699
ADCY6	9.19671	9.27738	9.00784	9.37355	9.22085	9.12413	9.55553	9.28698	9.26436	9.31785	9.22119	9.08052	9.4329	9.08861	9.50591	9.15298	9.12761	9.06239	9.08719	9.09368	9.24947	8.71657	9.07231	9.52988	9.60881	9.10785	9.73708	9.24797	9.35595	9.47345	9.23638	9.43454	9.41749	9.05855	9.31792	9.00335	9.13433	9.06302	9.15977	9.15069	9.32154	9.22516	9.34487	9.06762	9.29999	9.10435	8.92379	9.26141	9.30513
ADCY7	10.5385	9.64844	10.1517	10.1536	7.69434	10.177	9.83996	8.62227	8.68072	8.98058	9.32658	8.27854	9.23428	10.6443	9.86063	10.1715	10.351	10.1485	8.67653	10.0593	8.74445	9.68947	9.37145	10.12	8.83678	10.4729	9.29882	9.51208	10.102	10.1306	9.72141	9.43055	9.75881	9.53338	9.51702	8.84859	10.552	9.7408	9.44778	8.22185	9.23917	9.31255	9.91046	10.2956	10.559	10.1261	10.0817	9.89955	10.2094
ADCY8	4.14702	1.94572	1.93235	3.01008	3.48752	2.12361	2.61353	2.10992	2.65167	3.57071	1.71597	1.41924	1.68756	3.95313	2.06148	2.53227	3.30344	4.49976	3.64089	3.09395	1.53398	1.81788	1.5492	1.60337	1.64754	2.14818	1.42772	1.33074	4.02749	2.47784	4.72948	3.48076	3.24095	1.99347	2.5325	2.23746	3.52166	1.68654	1.68383	1.69512	2.7964	1.44864	2.91829	2.32992	2.63967	2.45158	2.62134	2.54268	3.88353
ADCY9	11.1207	10.3468	10.4497	10.9321	8.74234	10.6593	10.3031	9.74097	10.1796	10.2092	10.6652	10.0783	10.1541	11.0991	10.3096	10.5182	10.6655	10.8058	9.4891	10.5169	10.0294	9.6381	9.99708	11.1577	10.0406	9.81814	10.2353	10.0993	10.8418	9.70823	10.5823	10.1901	10.1401	10.3357	10.3448	10.9591	11.1301	9.73354	10.774	10.304	10.1843	9.80174	10.2477	10.2865	10.9772	10.1788	9.49848	10.2223	11.0536
ADCYAP1R1	4.451	3.13685	4.8199	4.10987	5.76525	4.6268	4.29035	4.38821	3.79857	4.10775	3.94347	3.90456	4.28565	4.1612	4.458	4.24643	4.58408	3.74792	3.60275	3.67279	4.16147	4.32736	4.14371	3.33437	3.89231	4.9298	4.34522	3.92699	4.89574	4.49608	4.00815	3.65585	3.65867	4.59602	4.04926	3.66086	4.42158	4.71509	3.90387	3.91274	4.21435	4.27885	4.34324	4.31184	4.05792	5.1769	3.96423	4.00137	4.06376
ADD1	8.4388	7.68871	8.27995	8.63023	6.98299	8.28475	7.94888	7.97335	8.10942	8.76307	8.4089	8.53389	8.05317	8.63818	7.91636	8.10342	8.46458	7.92223	8.26286	8.24641	8.21076	7.86238	8.47662	8.72707	8.84383	8.00996	7.89733	7.56838	8.8257	7.98388	8.95438	8.5931	8.04707	8.09741	8.00772	8.76067	8.63166	8.29815	8.3418	8.02808	8.63552	7.54088	7.97011	7.82084	7.78223	8.46063	8.41158	8.38599	8.74727
ADD2	2.76696	4.02075	2.31438	2.42662	2.09294	2.37852	3.56788	2.40536	2.88567	2.66047	3.85257	3.81266	2.75347	3.60089	3.7047	3.0042	2.99488	3.84746	2.66998	2.99504	2.4248	2.989	3.44896	3.91729	3.48406	2.54283	4.01196	3.97288	3.79639	3.64377	3.36419	3.01987	2.6657	2.97712	2.40691	3.33259	3.69393	2.72577	4.3605	4.37392	3.48468	3.69192	3.28962	2.50679	4.20401	3.26371	2.82913	2.6182	4.17372
ADD3	11.878	11.01	11.3795	11.6388	10.0853	11.2394	11.1468	11.1338	11.2568	11.3889	10.6133	11.3973	11.3865	11.5548	11.5581	11.7374	12.2409	11.083	10.8014	11.804	11.7247	11.1892	11.7104	12.0755	11.6002	10.718	11.4809	11.1044	11.5569	11.9959	11.7022	11.7753	11.3258	11.94	11.934	11.8071	12.2047	11.2982	11.2957	11.3062	11.8251	11.6905	11.6176	11.8499	11.269	11.6893	11.197	11.4216	11.7918
ADH1A	10.5471	10.1962	10.532	10.9286	10.2416	10.6361	9.79391	8.57662	9.88187	10.27	10.1111	10.298	9.39485	11.0773	10.3642	10.9777	10.4999	10.5213	8.44686	10.9485	10.1367	9.27538	10.7505	10.4711	10.8257	9.13926	10.6161	10.734	11.3105	10.851	11.3484	10.7203	9.63982	10.3352	10.1339	10.9274	11.2731	9.67244	10.8196	9.95155	10.8426	9.31881	10.1282	10.566	10.9924	10.9602	10.5474	11.3463	11.3039
ADH1C	11.9124	11.1435	11.6198	12.4785	12.2842	12.0062	10.853	9.35281	10.9156	10.5048	11.224	11.5319	10.6193	11.9576	11.3599	12.644	10.9319	11.8068	9.96294	12.7599	11.5189	10.5118	12.1763	11.6293	12.1208	9.86708	11.8295	11.994	12.1882	11.9857	12.7612	12.0673	10.8946	11.6544	11.7294	12.6906	11.2353	10.9304	12.2231	13.3432	12.3511	10.6619	11.4542	11.7012	12.0748	11.7351	12.0132	12.32	12.653
ADH4	2.41606	5.64681	3.98061	4.16349	4.14639	4.17056	4.00055	4.72382	8.06844	4.23334	4.64299	5.19596	5.0944	2.85484	5.76248	3.83368	3.88139	3.96861	3.94682	3.50156	5.69262	5.61659	5.07897	4.10604	6.7828	4.82232	5.24183	4.73767	2.78294	8.58035	4.95886	5.24762	4.389	6.6158	4.87714	6.50147	4.08038	3.31013	6.30232	3.31987	3.65895	4.67333	4.0683	3.92453	5.41292	4.95994	2.79227	5.26196	5.47441
ADH5	10.6374	10.1737	10.3979	10.2822	9.69231	10.1291	9.9636	9.67648	9.76208	9.62849	10.3627	10.1235	10.2767	10.8107	10.4785	10.4778	10.2619	10.453	9.41719	10.1912	10.0584	9.85202	10.3775	10.8428	10.5017	9.87238	10.5233	10.2163	10.8577	10.5868	10.4987	10.5478	10.0822	10.0658	9.94281	9.98696	10.6559	9.64738	10.0988	9.69864	10.0949	9.79947	10.1033	10.3572	10.5641	10.5836	9.71441	10.1725	10.6022
ADH6	2.51462	2.0007	4.27371	3.80787	3.24672	2.03	4.93126	3.23582	2.16942	2.31959	2.71404	4.92702	4.59813	2.16365	4.58588	2.39539	2.04424	2.85826	2.66329	1.66024	4.26449	3.19127	2.53677	1.78398	3.33841	2.01	2.37443	2.73571	2.14622	1.99879	2.06309	2.30955	3.09404	2.37608	4.79808	3.8777	1.90947	2.49629	2.56085	4.62141	3.06966	2.5093	2.49565	3.1402	1.9796	2.41753	2.36984	2.78858	2.16765
ADH7	1.91299	2.02735	5.6329	1.89865	6.14028	2.41435	6.6862	5.86955	2.18068	2.97186	2.04944	6.24169	6.15115	1.9978	6.30375	1.93202	1.96877	3.114	4.50044	4.75714	6.10019	5.62507	4.26246	1.6054	3.81045	1.68292	5.21337	4.60691	2.94663	2.98117	3.0088	3.23004	3.60909	1.72608	6.5489	3.60707	2.35011	1.21735	5.36727	4.60104	5.83787	5.51238	6.4313	5.5922	2.13732	5.95626	2.29247	4.72349	2.16346
ADHFE1	8.80195	8.22457	8.08667	8.68272	7.13083	8.66771	8.22637	8.64602	8.67371	8.51353	7.49072	8.35516	8.98737	8.2673	8.66014	9.16266	8.712	8.42596	8.71209	8.40609	9.04849	8.66227	8.60296	8.16507	8.54908	8.4078	8.01571	8.93765	9.04876	8.63545	9.30848	8.79017	8.46817	9.174	8.93854	7.75811	9.09138	8.70176	8.51187	7.97224	8.2326	8.99149	8.92376	8.51177	8.87003	9.12373	7.94408	8.22592	8.39565
ADI1	11.5471	11.782	12.0328	11.3712	11.1393	11.3482	11.5248	11.3729	11.6567	11.4351	11.713	11.1903	11.5124	11.2333	12.0488	11.5245	11.5371	11.4697	12.534	11.4232	11.5191	11.7704	11.5382	11.2655	11.4504	11.1998	11.5362	11.4774	11.346	11.3871	12.3113	12.3414	11.4712	11.4579	11.8908	12.1422	11.6468	11.5661	11.2912	11.8095	11.8048	11.3432	11.3234	12.0253	11.172	11.0805	11.1573	11.9893	11.417
ADIG	1.76802	2.05895	1.96925	1.88028	2.18652	1.84723	1.87301	1.91544	1.81761	1.90928	1.85251	1.68554	1.8656	1.86256	1.82435	1.84379	1.59282	1.81724	1.85027	1.76732	1.86136	2.00639	1.85749	1.84141	3.03852	1.94477	2.52438	1.66426	1.91227	1.80968	1.8188	2.78455	1.84339	1.82396	2.02398	2.59101	1.63475	0.713555	2.66666	2.53769	1.95224	1.7645	1.93537	2.6497	1.87935	1.88715	1.87208	1.89046	1.90976
ADIPOQ	1.80927	3.55819	2.43507	2.01044	3.09541	1.85109	8.36974	2.02367	3.80504	2.26971	4.65018	2.76955	2.05742	2.5375	1.92516	2.10493	1.88258	2.09222	1.9424	2.84534	2.79608	2.16932	2.55577	3.35835	8.43496	2.83199	5.35447	2.80362	1.91553	6.42679	2.04578	2.19392	4.65346	3.68981	1.87934	2.18144	1.66968	3.30249	2.28989	2.97056	2.25139	2.36472	1.82159	3.65013	3.0908	2.03097	2.14451	2.13509	1.83299
ADIPOR1	10.7381	10.6052	10.6634	10.4672	10.3349	10.6728	10.5117	10.7778	10.7126	10.816	10.896	10.4618	10.5348	10.5014	10.8088	10.9854	10.2692	11.0051	10.7214	10.7082	10.6861	10.7902	10.3933	10.3584	10.348	10.2879	10.4473	10.6671	10.5147	10.1182	10.678	10.8143	10.5693	10.5302	11.0656	10.9382	10.6919	10.452	10.9022	11.1794	10.7907	10.6646	10.6531	10.7913	10.4734	10.0691	10.4344	10.5825	10.7122
ADIPOR2	10.626	10.5159	10.3388	11.2527	10.1061	10.4038	10.1453	10.7234	10.4176	11.237	10.6737	10.2974	10.0628	10.8788	10.2334	11.1535	10.5202	10.7532	11.0228	10.7829	10.4051	10.154	10.3796	10.5024	10.3358	10.3631	10.043	10.3035	10.6696	10.3324	10.6343	10.3279	10.2831	10.265	10.3712	10.6556	10.6542	10.3283	10.6799	10.1566	10.2688	9.97602	10.3489	10.1894	10.7097	10.2294	10.4683	11.0619	10.6538
ADK	9.8477	10.5848	10.5844	9.2646	8.88589	10.3128	9.70887	9.23428	10.2848	10.0178	10.3194	9.44634	10.441	10.1992	10.1063	10.7509	9.78257	10.5905	10.005	9.97694	9.78945	10.2046	9.83083	9.9311	9.48949	9.90911	9.47691	10.1322	9.94525	9.19187	9.83298	9.65072	9.9913	9.85197	9.7397	10.1448	9.79465	9.73013	10.7382	9.737	10.2928	9.87754	9.87569	10.474	10.0675	10.2979	10.3502	9.99404	9.96568
ADM	11.1161	12.3253	10.8607	11.3508	11.1091	10.7735	10.8755	14.2344	11.4224	12.977	11.9531	12.7279	13.0258	12.4839	11.6649	11.6274	10.5874	11.5192	11.3343	11.3559	11.1133	10.29	11.707	11.6442	11.6407	11.087	11.6746	11.3923	10.8475	11.6943	12.2991	11.7601	11.4897	11.3301	10.2315	11.2737	10.8318	11.8736	11.0435	11.9475	11.3646	11.1646	10.8298	11.7381	11.8813	11.7132	12.0563	11.9041	11.3538
ADNP	10.7714	10.0988	10.6139	10.449	9.10079	9.99317	10.2287	10.6191	10.9034	10.5815	10.0683	10.7911	10.4146	9.86155	10.8329	11.1402	10.8347	10.4335	10.8227	10.6963	10.8534	10.8859	10.959	10.5325	10.8525	10.0647	10.7637	10.4135	10.2371	10.9459	10.7074	10.8405	11.1316	10.4207	11.3869	10.7398	10.9643	10.6407	10.5533	10.5803	10.901	10.9791	10.9863	10.5901	10.5834	10.6503	10.2151	10.2122	10.5526
ADNP2	7.99372	8.12069	8.22303	7.761	7.02484	7.87505	7.97422	8.32935	8.29223	8.56123	8.35207	8.23346	8.11742	8.36776	7.96848	7.89565	7.93301	7.80417	8.19786	8.02788	7.92003	8.00817	7.88396	8.43422	8.24526	7.81719	7.7459	7.90444	7.76896	7.93781	8.05958	8.26121	8.13709	7.87118	7.83676	7.84086	8.35072	8.18999	8.36106	8.04452	8.1435	7.85517	8.0827	7.90256	7.92739	8.07749	8.24727	8.15454	8.39937
ADO	7.82815	7.43184	7.58183	7.99934	7.9312	7.56895	7.16135	8.10883	7.41236	7.95867	7.67074	7.6473	7.37021	7.98613	7.77694	7.80522	7.85503	7.96925	7.84836	7.73409	7.33316	7.97969	7.4786	8.17734	7.723	7.40967	7.67856	7.40862	8.02564	7.78959	7.1871	7.3613	7.54991	7.266	7.62474	7.3832	7.89821	7.86115	7.6488	7.16894	7.34508	7.62607	7.47047	7.7426	8.05557	7.61968	7.84197	7.46408	7.67856
ADORA1	6.68619	6.61489	6.36625	6.60738	6.85981	6.43593	5.65271	5.77438	6.3871	5.96317	6.81319	6.60685	5.50485	6.65422	6.94261	5.64611	5.35789	6.25608	5.22044	5.99737	5.87846	5.59265	6.38728	5.61205	7.24471	7.12691	7.72625	6.9359	5.64684	6.79265	5.94634	7.32804	6.81759	6.42063	5.4536	5.62054	5.97323	6.57729	5.79059	5.13811	5.00963	5.75676	6.01657	6.86275	6.27822	5.42489	5.27336	5.90788	6.62226
ADORA2B	7.93479	8.05701	9.01736	6.8502	6.3289	8.02384	9.00548	10.0027	8.40783	9.27979	8.35765	9.57029	9.62408	8.05947	9.02365	7.92499	7.08673	8.25541	9.01026	8.64413	9.50694	9.72289	8.66741	7.6206	8.32749	8.44972	8.87776	8.80196	7.8443	7.10554	8.13329	7.99695	8.41575	8.53905	9.62397	8.88905	7.74407	8.23157	9.28446	9.73265	9.25861	9.17917	8.87213	8.62125	8.41715	8.84527	8.46547	8.8547	7.50164
ADORA3	5.62554	7.60517	6.98538	7.38072	5.55401	6.79638	6.38593	7.23737	6.14311	7.3887	5.56291	6.73315	5.44318	7.29914	6.23039	8.69072	6.48172	7.48444	5.75437	7.07699	6.6541	6.67197	6.12401	5.37456	4.88813	5.3476	6.57213	5.55866	6.12207	6.83263	6.27884	6.92875	6.08917	6.57672	6.29182	7.37713	5.7005	6.77302	5.98363	3.62932	6.45788	6.55303	5.82609	5.92569	6.65796	6.63166	8.30422	8.30355	7.1981
ADPGK	10.3915	9.90758	10.8553	10.6248	9.00432	10.443	10.4069	10.4519	9.89819	10.4571	10.3786	9.9503	9.73336	10.101	10.2158	10.8931	10.5233	10.8282	10.4513	10.446	10.0802	10.6552	9.97998	10.5153	9.80109	10.8135	10.0286	10.0887	10.3103	10.4767	10.1352	10.4387	10.387	10.5251	10.3891	10.2028	10.6618	10.6476	10.0137	9.96453	10.0564	10.4955	10.463	10.3451	10.6127	9.78031	10.7852	10.2878	10.2571
ADPRHL1	5.23287	5.02325	4.74955	4.57521	5.27471	5.24819	5.27817	4.95646	5.4908	4.87749	5.18314	5.52026	6.22592	4.0314	5.39286	4.93106	4.611	5.70951	5.46489	5.19828	5.823	5.48658	4.83687	4.43467	4.38211	3.97135	4.39776	5.76204	5.29638	4.57261	7.21041	4.34593	5.08645	4.95563	5.19949	5.39817	4.85035	5.40559	4.66856	6.71671	5.48833	5.31816	4.77192	5.35841	5.02775	5.61903	4.95542	5.39557	4.5722
ADPRHL2	9.887	9.4273	10.0489	9.78049	9.26007	10.0681	10.2129	10.2578	9.57794	10.4078	9.79121	10.4314	10.2564	9.39924	10.0716	9.82743	9.89024	10.0523	10.2744	10.2506	10.8648	10.4697	9.81213	8.88811	9.55025	9.50594	9.32089	9.76823	10.1182	9.23193	10.3849	9.69929	10.3756	9.88171	10.5963	10.2542	9.76311	9.49869	9.76737	10.7265	10.5482	10.5544	10.4534	9.92384	9.81157	9.62576	10.0988	9.79165	9.58461
ADRA1A	3.2686	4.68928	2.02148	2.45204	5.4588	2.15982	2.19689	2.59444	2.29385	2.81226	1.66625	1.54143	1.62704	2.78323	2.08198	2.2972	2.68252	3.14532	2.33881	2.02771	1.81743	3.98087	2.35019	1.9035	2.67373	1.93177	1.35861	1.81559	2.32159	2.07481	2.21004	3.24918	2.17979	2.65195	2.14535	2.36906	4.14215	2.19821	2.19468	2.20937	2.61113	1.71511	1.90644	2.44283	2.97334	3.66312	2.60401	2.74736	3.52574
ADRA1B	8.95779	7.5433	7.59537	8.7137	8.38312	7.73833	7.04573	7.69257	7.34726	8.28944	7.66705	7.23886	8.12488	9.18587	8.22434	9.84321	7.80373	7.20564	7.19389	8.27087	8.10218	6.90536	9.16208	7.56928	7.21115	7.32461	7.39851	8.35562	8.30309	9.07639	8.85047	8.25773	7.17926	8.63132	8.13323	9.63575	8.05522	8.7092	8.99135	7.71887	8.39498	7.03788	7.58723	7.01333	9.12745	9.16378	7.48089	9.48239	8.7567
ADRA2A	8.60291	9.21145	8.89189	7.94803	7.23055	7.80329	8.8473	8.8687	9.47795	7.66533	9.81815	9.84524	7.95436	8.32334	8.67862	7.49735	9.16899	8.69611	8.98013	8.97715	8.44581	7.96898	8.56105	10.6147	9.67066	8.95866	9.99758	8.76549	8.90708	10.389	9.41058	9.28976	9.411	9.01598	8.64478	8.48074	8.62852	8.48123	8.60593	7.63899	9.46318	9.50006	9.3034	9.10801	8.2079	9.11202	8.27021	7.92305	8.72764
ADRA2B	4.85288	3.6742	4.15711	4.00772	7.20859	3.6383	4.61732	3.14609	5.4014	4.12703	4.12994	3.57667	4.37003	4.92292	4.84311	4.52312	4.14079	3.61361	4.76075	4.62129	4.44635	4.74592	4.98154	2.44568	5.78231	4.67871	5.38483	4.02258	4.4097	6.44423	4.7545	4.68312	4.76482	4.7455	4.50286	3.60848	4.65731	3.93481	4.17225	4.71224	4.80852	3.75975	4.9511	4.03157	4.50144	5.20278	4.91639	5.68665	3.62902
ADRA2C	9.05263	10.1486	9.07568	10.7213	12.1416	9.72227	9.49565	11.5513	10.9572	10.3463	10.4767	11.0807	9.70042	10.7059	10.6333	9.59448	9.02764	9.6416	10.7061	10.1659	10.819	10.055	10.5917	9.22635	11.0884	9.92433	10.7113	10.4153	10.4112	11.1915	10.5654	10.687	10.4966	10.5581	10.2099	10.6124	10.2898	9.76319	9.75853	9.77794	10.381	9.84956	9.83858	9.0844	9.94529	10.3331	9.85869	10.6751	10.0577
ADRB2	11.0978	10.7215	10.6596	11.5254	9.82514	11.2206	10.2572	9.97628	10.3724	11.62	10.4268	11.0937	9.60201	11.2582	10.9701	11.2489	10.9923	11.2046	10.2787	10.8305	10.1947	9.95765	10.1684	10.0895	10.058	10.4105	10.0468	10.0885	11.0864	10.626	11.1212	10.8553	10.4326	10.9409	10.556	11.4568	11.6374	10.3346	11.0117	10.6755	10.952	10.3048	10.6169	10.635	11.5907	10.5998	10.6695	10.6956	11.2437
ADRB3	3.91566	5.03782	4.58437	4.04968	5.86035	4.06736	5.4069	5.1194	4.27261	4.05896	4.59415	4.76195	5.48531	2.88585	4.7648	2.89167	3.90513	4.13601	4.18497	3.61002	4.57073	4.47133	4.42574	3.3521	4.05917	4.30378	4.46391	4.66278	5.14784	3.76394	3.664	4.37221	4.286	4.82641	5.00772	4.66114	4.02128	3.54171	3.95184	4.02578	4.19547	4.79209	4.04191	4.73581	3.64248	4.69847	4.21287	3.85377	3.97094
ADRM1	9.36381	10.0508	9.64795	9.76121	10.6829	10.0339	9.58341	10.0192	9.92752	10.2967	10.3737	9.79182	9.71669	9.79615	9.85138	9.70356	9.46383	10.1629	10.4355	9.77754	9.79687	9.91271	9.8352	9.63549	9.93078	9.68625	10.029	9.99907	9.75011	9.78174	9.39299	9.67065	9.79194	9.71746	9.732	9.95941	9.33286	9.64048	9.93837	10.0288	9.72292	9.75854	9.71874	9.81159	9.65407	9.57806	10.2978	9.33853	9.69565
ADSL	9.44823	9.64324	9.53205	9.36934	8.89857	9.47285	9.37447	9.70629	9.58788	9.65483	9.65647	9.47786	9.29411	9.60716	9.33304	9.84422	9.57788	9.59778	9.41177	9.58176	9.41933	9.83218	9.49185	9.56382	9.58701	9.5894	9.38911	9.57061	9.33166	9.67925	9.25393	9.43868	9.54645	9.43067	9.4159	9.58988	9.46814	9.56112	9.43908	9.20559	9.62815	9.49571	9.39623	9.41715	9.58938	9.305	9.79829	9.63669	9.66674
ADSS	10.3238	10.2627	10.5201	9.77593	9.13338	10.3261	10.6576	11.2262	10.5837	10.5518	10.0224	10.6795	10.5062	10.0199	10.2454	10.3189	10.2016	9.81903	10.48	10.6191	10.6683	10.8044	10.3103	9.91855	10.1614	10.3134	9.75569	9.96252	9.84311	10.2576	10.17	10.5276	10.3001	10.335	10.6784	9.99518	10.3768	10.5367	10.4674	10.935	10.6993	10.3894	10.5761	9.9891	10.24	10.7984	10.3805	10.2642	10.2685
ADSSL1	8.73418	8.79972	9.13355	8.00565	7.4077	8.62722	9.70212	9.17657	9.34867	8.97346	8.98548	10.3138	10.5049	8.83862	9.35276	8.56425	8.38268	8.56519	9.06336	9.63183	10.1667	9.84331	9.86236	8.53006	9.28987	8.69454	9.29975	9.90919	9.39013	9.36153	9.5954	9.37018	9.67892	9.77627	10.0515	9.56523	9.00788	9.59897	9.02335	10.4192	9.77152	9.54222	9.4225	9.46416	8.9195	9.58026	8.64886	9.95209	8.17282
AEBP1	11.8979	13.1131	11.1585	13.2835	13.4959	11.6884	12.7958	12.6767	12.5823	12.7844	12.5914	12.1807	11.7306	12.4843	12.6685	11.9339	13.0488	12.4957	12.1183	12.3126	12.0171	11.3678	12.6439	13.6224	13.4544	12.135	13.7145	12.6337	12.8962	13.2611	12.8814	12.7848	12.4718	12.4743	11.5983	12.2813	12.7072	12.5251	12.4587	11.4471	11.6421	12.2428	12.0463	12.1263	12.4136	12.089	11.9606	12.258	12.4104
AEBP2	10.0002	9.93895	9.99843	9.7763	8.79277	9.93506	9.97226	10.3657	10.1063	9.6592	9.50142	10.4453	10.1265	10.1022	10.3919	9.553	10.1973	9.7526	9.42664	10.0217	10.0892	10.0473	9.94322	10.6913	9.7209	9.68333	10.036	9.81972	10.2746	10.0054	9.97861	10.3618	10.0917	9.98016	10.0693	9.66886	10.3237	10.1094	9.79916	9.84048	10.327	9.91024	10.1904	9.91394	10.1874	9.96266	9.41666	9.95709	9.96565
AES	13.542	13.2666	12.8917	13.3313	13.0374	12.9809	12.8711	12.3521	13.2699	13.008	12.9899	12.9419	13.1477	13.3266	13.3702	13.0097	12.9431	13.0203	12.4368	13.2912	13.2502	12.7226	12.9194	12.7596	13.3139	12.6509	12.7747	12.9489	13.4416	13.0052	13.5721	13.3356	13.2285	12.9538	13.114	13.2834	13.0462	12.7927	13.3378	13.5309	13.1645	12.7776	13.1286	13.234	13.2835	13.1049	12.5594	13.2728	13.7436
AFAP1	6.63407	7.49618	5.93675	6.7386	8.00274	6.5075	7.10901	7.14438	7.38715	6.82742	7.30983	7.25148	7.06002	7.15046	7.04324	6.29744	8.11489	7.07578	6.62554	6.48337	6.68708	6.61005	7.54572	7.55438	7.85405	6.50143	7.50373	7.48671	7.17551	7.15958	6.51674	7.25622	7.32868	6.49316	6.70444	6.75671	6.67804	7.05439	6.80674	6.92683	6.49775	6.22362	6.57889	6.61983	6.57582	6.79719	6.46495	6.60658	6.90113
AFAP1L1	10.1833	9.40784	9.14354	10.7942	8.52676	9.60562	9.13897	9.10967	9.21158	9.78384	9.56698	9.50921	9.2495	9.87676	9.08557	9.93743	9.8019	10.1332	8.31858	9.6618	9.20917	8.74629	9.08159	9.34817	10.1224	9.38459	9.33573	9.05305	10.0794	9.54796	9.71626	9.44065	9.26768	9.21501	8.66815	9.9071	10.6344	9.35154	9.66278	8.12235	8.63054	8.83706	9.3002	8.95997	9.66837	9.0063	8.86097	9.43348	10.6617
AFAP1L2	8.62613	8.13688	7.92478	8.10652	8.50138	7.97011	8.32976	7.49905	8.79298	7.96017	8.32192	8.19646	8.12676	9.00415	8.27049	7.47375	9.26864	8.32522	8.18231	8.27454	8.29379	8.27756	8.08819	8.54924	8.86316	8.21721	8.60412	8.05324	8.5051	8.54568	8.62106	8.36126	8.90347	8.48238	8.34835	8.04952	8.76887	8.44872	8.42531	8.13082	8.35914	8.58201	8.74413	8.62168	8.51501	8.43591	8.50159	7.98891	8.54981
AFF1	9.89459	10.1566	9.65248	9.46181	7.82708	9.48934	9.76292	10.846	10.0729	10.0674	9.29614	9.93328	9.67044	10.6775	9.72717	9.92338	9.95843	8.89379	10.0917	9.89227	9.99301	9.5673	9.67704	9.50542	9.4498	9.91967	9.31595	9.75923	9.76577	9.87722	10.129	9.95863	9.95376	9.65483	9.06905	9.33492	10.376	9.10911	9.10762	9.11383	9.64132	9.11802	9.74642	9.60246	9.95108	10.3655	10.1451	10.5577	10.7386
AFF2	5.00764	4.77936	4.09441	5.81201	3.69572	4.34229	3.51665	4.60187	3.03101	5.87017	3.42385	1.94173	2.5757	4.94959	3.29287	5.41084	4.12872	5.14906	3.2777	3.9594	3.24602	1.9971	3.06441	4.12589	1.73051	3.69854	2.70678	3.59905	5.1234	2.61031	4.36886	3.57951	2.85234	3.91732	3.23486	4.06734	4.65712	3.83203	3.7791	2.22542	3.27804	3.00253	2.96478	2.39277	5.00185	2.60545	3.38518	3.76899	5.41094
AFF3	6.56505	4.93005	4.53953	7.42612	3.03288	6.52455	4.66439	4.73564	4.35368	5.6498	5.11142	4.68744	3.92672	4.83821	2.57856	6.68338	5.65781	6.05726	4.6892	5.23183	3.71233	2.70895	4.50475	5.05616	4.31559	4.05674	4.83402	4.97928	5.35838	5.43316	5.46018	4.7052	4.07187	4.64817	5.25613	6.96033	6.75599	5.59657	3.43449	3.44715	3.47123	3.65573	4.21943	4.53732	5.45191	4.65523	4.41148	4.40916	6.39561
AFF4	7.09892	7.12376	6.9998	7.36782	7.00149	7.47826	6.52099	7.40074	6.75299	7.13837	7.6433	7.19958	6.99555	6.58796	6.50596	6.30538	7.65385	6.91718	7.47861	7.08831	6.91094	6.91308	6.91922	7.20597	7.14266	6.62751	6.60539	6.6343	6.1267	6.93844	6.73098	7.10278	6.58613	6.68935	7.05875	7.63114	7.44304	6.89573	6.92093	7.19478	7.15317	6.64835	6.99675	6.7148	6.58705	6.94016	6.91596	7.22435	7.10267
AFG3L2	9.41087	8.81767	9.40689	9.24326	8.062	9.16595	8.81611	9.44534	9.39129	9.32427	9.31734	9.11365	9.07264	8.60086	9.00206	9.5966	9.12597	9.19994	9.62255	9.18881	9.25979	9.3771	8.95908	8.40745	9.13731	8.95683	9.02209	8.82257	9.08743	8.70909	9.31533	9.53569	9.10559	8.93604	9.01994	9.13705	9.50408	9.36366	9.34111	9.54908	9.31553	9.26535	9.14856	9.08394	9.17214	8.32336	9.20078	9.17268	9.53421
AFMID	4.81504	4.6083	5.19844	4.20071	5.97545	4.86036	5.54115	5.02087	5.13047	4.82355	4.44124	4.57857	5.32603	6.17864	4.05161	5.09014	4.53009	5.26592	5.23303	4.98777	5.18363	5.52157	4.88046	4.66571	4.21383	4.71837	3.68729	4.61955	4.69689	4.65256	5.28755	4.58849	5.05073	4.97627	5.03144	4.70226	4.80894	4.85709	5.0049	4.69187	4.91385	4.86007	4.66659	4.97367	4.38718	4.4125	5.29608	5.22255	5.15495
AFTPH	10.0165	9.37877	10.0554	10.019	9.76121	9.75246	10.0308	10.313	9.54286	10.2093	9.6327	10.2978	10.2396	10.2045	10.1753	10.2258	9.60321	9.89954	10.2047	10.07	10.0575	10.1086	9.94971	10.3143	9.60238	9.84103	10.0465	10.0347	10.2433	9.81395	10.0013	9.77809	10.0302	9.89603	10.1458	9.7355	9.5283	10.0009	10.2621	10.6896	9.96068	10.1563	10.0891	10.2323	10.1428	10.0123	9.75789	9.69459	9.76579
AGA	9.88556	9.53335	10.0227	9.79397	8.88112	9.25845	9.68611	9.40682	9.71294	9.57231	9.87198	9.27536	9.72361	10.0391	9.96604	10.2987	9.71724	9.97385	9.40962	9.60178	8.96748	9.27322	9.76438	10.2137	9.81489	10.4824	9.62706	9.65023	10.066	9.91734	9.89945	9.71628	10.0941	10.2948	9.86584	9.69214	9.58987	10.1729	9.62771	9.70003	9.36992	9.82833	9.76662	10.3046	9.27245	10.0635	9.80076	9.90495	9.58504
AGBL2	8.76142	5.91315	9.83384	6.14706	7.12726	8.79762	9.98073	10.8454	8.18839	9.52374	7.54029	11.9132	11.3408	7.90871	10.1618	6.90027	6.51136	7.84104	9.58028	10.6488	11.9711	11.1586	9.76626	6.28683	8.15888	8.09515	6.30856	9.68736	10.1408	6.83227	9.91573	8.39883	10.4473	9.81922	11.4365	9.26887	7.2289	5.66226	9.21538	10.938	11.4392	11.115	11.2854	10.1109	9.07419	10.3833	8.34109	9.63843	6.27394
AGBL3	6.55757	6.46442	7.63887	7.18435	8.10301	7.68612	7.18681	7.25931	6.29852	6.8503	7.23487	7.21145	7.14764	7.19846	7.22689	6.49546	8.09714	7.25249	7.56709	6.51218	7.07344	6.91352	7.72173	7.8528	7.54619	6.75484	8.45599	8.09299	7.49132	7.72794	6.28482	6.83219	7.20296	6.49505	7.18711	6.84783	8.18157	7.02953	7.02649	9.16722	6.86847	7.30897	7.27977	7.68581	7.13823	6.76347	7.19703	6.30966	6.21968
AGBL5	7.04982	6.7435	6.43922	7.08856	7.65543	7.02678	7.07279	6.71241	6.80935	6.81267	7.33634	6.99819	7.55727	6.51371	7.27992	7.30271	6.94299	6.99936	6.7674	7.16412	7.30568	7.2123	7.12526	6.76118	7.157	6.14326	6.6974	6.99797	7.17324	6.50692	7.32889	7.45146	7.28058	6.75677	7.48367	7.14924	6.96084	6.86418	7.40946	7.71369	7.37672	7.49655	7.12966	6.99973	7.21278	6.30405	6.54153	6.64406	7.07169
AGER	14.7814	12.8461	12.5743	14.7677	12.3993	13.7814	12.1729	9.30595	12.4302	13.7002	12.3686	9.29092	11.773	14.2444	12.6347	13.5499	13.5999	14.1942	11.6106	13.4059	10.9438	11.0758	10.9112	12.2797	9.45591	11.6128	10.1972	11.6638	14.7718	10.6093	14.2717	11.8865	12.6714	13.1688	12.6853	14.3939	15.0837	12.2169	11.2808	11.1441	12.8676	10.4467	12.879	12.6967	13.9265	12.2785	12.5005	12.4084	15.0502
AGK	7.15736	7.55377	7.38908	7.18377	6.26139	7.03141	7.00817	7.08717	7.43752	7.20238	7.46878	6.93819	7.21503	7.43189	7.35824	7.41133	7.20183	7.42119	7.06225	7.10783	7.45147	7.39239	7.15104	7.25819	7.36858	7.41017	7.06816	7.44019	7.02254	7.21602	7.47117	7.32754	7.29346	7.31515	7.47061	7.13631	7.37977	7.01109	7.25656	7.44879	7.45574	7.12665	7.20087	7.08985	7.30755	6.88017	7.40738	7.30191	7.63311
AGL	9.35747	9.35531	9.74135	8.99791	7.72678	8.92068	9.81616	8.90278	9.57738	9.01457	9.16366	8.88569	9.48322	9.24637	9.79359	10.1522	10.0734	9.03023	9.36761	10.1567	9.55993	9.41885	9.70637	10.1373	9.28273	9.393	9.25104	9.57286	9.06917	9.69459	9.08272	9.65445	10.0959	9.68476	9.42211	8.90569	9.36763	9.8004	8.80218	8.81329	9.67555	9.72572	9.79092	9.95917	9.26168	9.6064	8.05486	9.01968	9.52739
AGMAT	3.83587	4.4671	4.77425	4.08598	4.72129	4.1826	5.34067	5.12054	5.6246	4.40122	5.05582	3.66686	4.09531	3.51966	4.54818	5.62911	4.03908	4.67031	5.50048	3.97406	4.3063	4.16839	4.69199	4.77112	4.84746	5.14139	5.52695	4.98781	3.24548	6.2662	4.44078	5.81149	5.16106	3.86319	4.69691	3.94032	4.06223	5.66621	4.98909	3.32722	3.83466	5.16774	4.45934	5.1903	4.10701	5.09213	6.97468	3.84083	4.26128
AGPAT1	10.9019	11.0106	10.6672	11.2101	11.5607	10.8696	11.076	10.7627	11.0486	10.937	11.2154	10.7286	10.9571	10.7641	10.8331	10.4437	10.7209	11.068	11.09	10.8386	10.8781	10.5031	11.0359	10.9502	11.2028	11.0167	11.1787	11.07	10.8177	11.058	10.9769	10.8207	10.971	10.9493	10.7769	10.9133	10.7758	10.7657	10.7636	10.7721	10.7645	10.7433	10.7369	10.9291	10.7317	11.1131	10.7932	10.8822	10.9472
AGPAT3	9.49002	9.82748	10.4547	9.78775	10.009	10.0517	9.84512	10.0038	9.25179	10.1838	10.339	10.0011	10.4109	10.0126	9.54064	10.7026	9.55998	10.8247	9.68337	9.73462	9.58361	10.4538	9.37122	9.64089	8.79718	9.89147	9.12499	9.76192	9.67286	9.09932	9.56214	9.49688	9.64487	9.55425	10.0884	9.62677	9.56762	10.1137	10.1188	10.303	9.9266	9.84847	9.62238	10.1822	9.77878	9.84403	10.6039	9.81094	9.67023
AGPAT4	9.89048	10.0081	9.97382	9.68441	9.30874	9.42246	10.1394	9.91934	10.0976	10.0621	9.84801	9.64272	10.6927	10.3263	9.95043	10.0335	9.99068	9.80832	10.1105	10.1433	10.2548	10.3976	9.59445	9.94824	9.68099	10.556	8.94026	9.34111	9.89711	8.87314	9.73802	9.46184	10.4428	10.6501	10.0806	9.7171	10.0175	10.8787	9.65159	9.66055	9.98937	9.85504	9.94201	9.47912	9.67352	10.0385	9.19277	9.88738	10.0407
AGPAT6	9.76896	9.51106	9.64473	9.89016	10.2714	9.54479	9.61944	9.80684	9.64836	10.1472	9.88724	9.2916	9.28677	9.20455	9.54146	10.1141	9.73811	9.53891	10.081	9.57014	9.44827	9.68595	9.62686	9.16004	9.85163	9.67101	9.72463	9.53058	9.33301	9.54056	9.69642	10.012	9.79656	9.4659	9.50832	9.51084	9.67698	10.069	9.79938	10.1096	9.56587	10.0154	9.57755	9.53481	9.55537	8.83702	9.76583	9.65219	9.72312
AGPAT9	7.45414	8.04962	8.23583	8.11624	6.67224	7.8925	7.95263	9.55398	8.5728	8.88531	7.97396	8.0611	7.93562	7.73355	7.8571	7.51423	8.39616	7.65754	9.3729	8.07554	8.21025	9.80214	7.49723	8.1886	7.75417	7.89144	7.15162	7.38818	7.42698	8.72551	7.99972	8.26215	8.31388	7.98871	8.37413	8.15368	8.17588	9.32288	7.38412	8.53489	8.21761	8.4674	8.54399	8.10126	8.28734	8.2997	8.42133	7.50606	7.95037
AGPS	8.63399	9.04372	9.10804	8.45142	7.44327	8.61322	9.01424	8.28334	8.3694	8.53284	8.8475	8.62669	8.82619	8.8833	8.41327	8.74865	8.98373	8.56428	8.3317	8.59557	8.55015	9.46045	8.55949	8.94797	8.43899	9.36319	8.38758	8.54983	8.4246	7.84428	8.06757	8.32486	8.44289	8.60413	8.45883	8.33967	9.01891	8.56998	8.35482	8.38642	8.46935	8.27668	8.48873	8.63196	8.41978	8.56352	9.14821	8.5845	8.26853
AGR2	10.6074	11.1209	10.9505	9.84764	10.3621	10.9595	12.4288	13.2622	11.7705	10.8728	11.2766	13.5582	12.1038	10.6332	11.9631	11.1037	9.84469	12.1475	12.2771	11.605	12.7974	12.5977	12.0274	11.3284	11.6424	10.5186	11.4923	11.8372	10.9848	10.5773	11.3065	11.2667	11.8828	12.2792	13.1329	12.2988	9.86639	10.4681	11.0923	13.4358	12.3793	13.0748	12.3919	11.882	11.1189	11.485	11.1066	11.9656	10.0179
AGR3	11.6906	10.8711	11.458	9.32462	8.77987	11.6941	11.7151	11.5079	11.2043	10.6349	10.688	12.2636	12.417	11.5072	11.792	10.6975	10.0663	10.7232	11.697	11.5463	12.1659	12.0523	10.9104	11.3233	9.63798	10.4027	10.4286	10.8684	10.9751	8.9104	11.0976	10.6676	11.456	11.8337	11.6852	11.4396	10.099	10.808	11.8604	12.292	12.6743	11.9294	11.4738	11.3812	11.309	11.3487	11.0274	10.9867	9.64415
AGRN	10.4118	10.1249	10.1832	10.4198	9.64631	10.891	10.9928	9.95231	10.5473	9.99102	10.457	9.34923	10.7431	10.2817	10.3123	10.3375	10.0854	10.9486	10.6061	10.0181	10.4649	10.302	10.149	9.53659	10.0206	9.84811	10.6136	10.3702	10.5726	8.51359	10.3215	10.1619	10.4692	10.1721	10.4579	10.7656	10.3084	10.6924	11.1737	10.4941	10.6138	10.7458	10.3686	10.2645	10.2557	10.6956	10.0994	10.7182	10.6172
AGT	8.17272	10.2562	7.51259	8.54655	8.69982	7.39769	9.09044	10.1528	10.3233	8.77218	9.88853	8.97362	9.1409	8.97017	9.30523	6.80589	9.06106	7.92402	7.57065	8.77749	8.77552	7.97648	10.0505	11.0346	10.8288	9.37635	10.1658	10.1389	8.5267	9.33796	7.69871	8.85578	9.65225	9.74223	7.86437	8.04796	7.59341	9.22445	7.76826	9.90383	7.38354	9.26364	7.2663	8.8799	7.62799	8.54575	7.94836	8.40278	7.24217
AGTPBP1	9.13657	8.43279	8.82352	9.28926	6.7828	8.83274	8.05989	8.49061	8.54392	8.76735	8.04712	8.61869	8.35042	8.96701	8.58447	9.01097	9.09977	8.89397	8.24708	9.05306	8.39047	8.92357	8.35721	9.3697	8.15561	8.80873	8.14796	8.51404	9.11655	8.43216	8.78587	8.4082	8.8559	8.75612	8.90487	8.57104	9.6248	9.54739	7.625	8.62153	8.55434	8.78737	8.69542	8.66187	9.00321	8.22457	8.88486	8.30276	8.95003
AGTR1	7.93363	7.71637	6.56363	7.9152	4.68783	7.22818	5.68589	7.42777	6.51945	7.79809	7.02722	5.69737	5.73906	8.35557	6.94009	7.8991	7.12664	7.78486	6.57262	7.19537	6.39127	5.06911	6.44521	7.62597	6.26494	5.61203	5.37346	6.38551	7.77777	7.22456	7.37759	6.98977	5.84117	7.4571	6.6052	7.52301	8.22811	6.04222	7.65494	5.30061	6.91195	5.02001	6.41718	6.96344	7.2484	6.96781	6.76222	7.48906	8.35969
AGTR2	1.39638	5.79955	2.17098	7.23588	5.2937	6.87174	4.76445	4.46326	5.33201	7.2881	6.06602	6.87144	1.84632	5.4162	4.26296	5.23232	4.33853	7.85793	10.7937	5.68503	1.10321	3.59932	5.81259	7.09449	1.49517	1.54451	1.46567	6.03682	6.28717	4.62921	6.99953	3.82904	6.2637	7.54775	2.5748	5.22124	7.892	7.22214	6.06823	3.07049	1.90219	6.87297	6.7737	1.94894	6.41043	2.58467	5.75858	4.39317	8.55366
AGTRAP	7.76686	7.619	7.5318	7.97732	8.2343	8.03928	7.48728	7.20568	7.39034	7.68987	8.1292	7.94191	7.93225	7.6647	7.59945	7.97623	7.73601	8.04963	7.68849	7.68914	7.62831	7.92931	7.60873	7.43833	7.77387	7.77943	7.57588	7.55077	7.70132	7.47039	7.12892	7.49725	7.73915	7.65296	8.05737	7.91504	7.71463	7.29762	7.55546	8.32376	7.61833	7.62246	7.7256	7.76887	7.67479	7.46359	8.17098	7.38212	7.59748
AGXT2	1.78385	2.09931	1.84359	2.03693	2.21062	1.94311	1.98083	2.01563	1.98412	1.89787	1.84261	1.62713	1.84845	2.03109	1.89676	1.97767	1.82473	1.82106	2.07659	1.79299	2.47872	2.03101	1.87293	1.8819	1.92684	1.96565	2.6936	1.58856	1.98947	1.86038	2.05773	1.83653	1.89639	1.87315	1.85636	2.02172	1.62888	1.86852	1.86658	1.87466	1.97941	1.97586	1.96334	1.76267	1.96867	2.12915	2.15142	2.0323	1.99373
AHCTF1	8.85946	9.45062	9.17357	8.90254	8.11337	8.97311	9.01839	10.0839	9.43289	9.87116	8.6733	9.77588	8.77908	9.89594	9.20224	9.32265	9.07087	8.51277	9.55167	9.50075	9.56883	8.90898	9.22938	9.21939	9.11096	8.98144	8.77393	9.12102	9.1532	9.49772	9.27818	9.42774	9.2281	9.38584	9.2027	9.02717	9.15879	8.72794	8.72571	8.735	9.46682	9.2091	8.8295	8.81794	9.41217	9.36677	8.9373	9.74651	9.28895
AHCY	8.69287	9.16782	8.84517	8.69347	9.34852	8.89725	8.66732	9.04906	8.94793	8.99934	9.29613	8.74599	9.01249	8.1314	8.99535	9.41213	8.76698	9.16275	9.33433	8.839	9.19185	9.19922	8.74398	8.41295	8.99001	8.31995	9.00424	8.77193	8.27951	8.68056	8.87555	9.07629	8.87045	8.48394	9.2766	9.00652	8.54362	8.70683	9.49774	8.9966	9.26846	9.31818	8.85944	8.75456	8.5063	8.03938	9.30612	8.91331	8.6428
AHCYL1	10.1819	10.3199	9.9667	10.0627	9.1551	10.1005	9.98518	10.0867	10.0401	10.3858	10.2162	9.86814	10.2722	9.81707	10.0096	10.4234	9.97033	10.1232	10.1247	10.0306	10.0423	10.2408	10.0276	9.72208	10.1029	9.51007	10.102	9.81283	9.9021	9.64243	10.0678	10.4903	10.1447	9.82201	9.97703	8.68911	9.73897	9.84561	10.373	10.1577	10.4105	10.1499	9.91469	9.77129	9.81776	9.58873	9.80089	10.1467	10.3393
AHCYL2	11.7859	11.7619	11.8019	10.6314	9.57856	11.6556	10.8317	10.2058	11.5729	11.1884	11.727	10.8828	10.721	11.5364	11.2958	11.7872	11.2668	11.2092	11.3569	11.2957	10.4991	10.7457	10.6905	11.3209	9.79482	10.9623	10.5497	11.176	11.2185	10.1764	10.9047	11.1857	11.251	10.995	10.5818	11.0335	11.4993	10.9788	11.6133	10.6009	11.673	10.9787	10.9485	11.9863	11.727	10.8488	11.1983	11.21	11.3317
AHDC1	8.38975	9.08689	8.43997	8.40975	9.09966	8.60593	8.82169	8.71959	9.01558	8.63803	9.18463	9.2414	9.349	9.06686	8.58567	8.04119	8.43009	8.49612	8.23921	8.93221	8.95996	8.57881	8.99236	9.5531	9.61562	8.90361	8.95823	8.92447	8.69864	9.19596	8.89906	8.64256	8.66202	8.98467	9.10486	10.0114	8.33466	8.03089	8.88795	8.90366	8.88826	8.71786	8.93884	8.76549	8.59609	9.28799	8.76331	9.12283	8.74763
AHI1	7.33932	7.29008	6.7978	6.82443	5.2478	6.8421	6.85664	7.74814	7.49221	7.30882	6.87047	8.09244	7.31384	6.84257	6.9285	6.93443	7.50323	6.51285	7.16919	7.31313	7.29923	7.32811	7.08064	6.89846	7.08664	7.3987	7.20501	7.03396	6.32501	6.89884	7.38512	7.17338	7.1578	7.03687	7.29896	6.97966	7.21277	7.79109	6.69554	7.39516	7.63425	7.00448	7.26173	6.96094	6.99326	6.93629	6.88803	7.23617	6.80164
AHNAK	11.6387	10.1246	10.6991	11.0107	9.55366	10.4725	9.89031	9.85927	10.4041	10.0786	9.89675	9.69647	9.77492	10.2276	10.8791	10.9336	10.8722	9.9506	9.87949	10.8655	10.6588	10.4657	10.2332	9.77233	10.9185	9.99511	10.0188	9.97597	10.6119	10.697	11.4382	11.2994	10.6669	10.6012	10.7521	11.229	11.6531	10.3181	10.7588	10.1393	10.6572	9.72511	10.7016	9.96996	10.6635	9.55683	10.2995	10.619	11.6591
AHR	11.4883	11.6671	11.4467	10.9742	10.2477	11.3558	11.632	11.6888	11.7308	11.0559	11.4015	11.501	11.5238	11.4923	11.7986	11.0979	11.9902	11.2793	11.7334	11.2604	11.2167	11.4308	11.1376	11.93	11.0843	11.3658	11.7374	11.5262	11.3374	11.4065	11.4549	11.4808	11.3249	11.53	11.4527	11.3515	11.4269	11.8096	11.6061	11.5921	11.5728	11.6485	11.2626	11.5456	11.4729	11.7367	11.2385	11.0569	11.2076
AHRR	6.856	6.37756	6.81621	6.67752	4.38538	4.47316	5.33347	4.5313	4.4793	4.92857	5.65017	3.79379	5.53582	4.89648	6.00459	3.6018	4.17006	4.33673	3.95582	4.48466	4.60422	5.35333	4.45226	4.80352	3.16318	5.81843	4.24828	3.92695	5.8308	6.24496	5.04834	5.04009	4.954	5.11562	5.234	3.51802	3.91522	4.89124	6.80188	5.18424	5.10215	3.42549	4.96967	5.15233	5.15264	5.52466	4.38738	5.27212	5.55483
AHSA1	10.8715	11.1097	10.9426	10.6732	10.1421	11.0497	10.8785	11.3937	10.8811	11.4081	10.8818	11.8415	11.375	10.5448	10.9769	10.8943	10.6087	10.8283	10.6379	11.0223	11.5105	11.2454	10.8013	10.1879	10.6702	10.4518	10.7919	10.5633	10.8004	10.5523	10.7427	10.6595	10.8386	10.7743	11.1025	11.1106	10.828	10.4458	11.1451	11.4164	11.4306	10.875	11.0622	10.7777	10.9792	10.6749	10.8318	11.221	10.8858
AHSA2	11.9248	11.4737	12.433	12.3525	9.76315	11.3319	12.2659	11.2913	12.1806	11.4167	10.6298	11.6243	12.4393	11.6272	11.9751	11.8704	11.8527	11.0539	11.7267	12.369	12.3975	11.9782	11.8885	11.7557	11.6893	12.5002	12.0829	12.0996	12.3639	11.8449	12.7376	11.4158	12.1174	11.8968	12.7412	10.7332	11.7948	12.2689	11.7858	12.0882	12.4231	12.037	12.4523	11.2514	11.8696	12.2171	11.7131	11.804	11.5488
AHSG	3.4544	3.02113	2.68186	2.77351	4.34407	2.80356	3.08864	3.66281	2.67818	2.8201	2.97727	2.71292	3.85532	3.45149	3.61642	2.69483	2.46406	3.61483	1.95514	1.72867	3.0052	1.77823	3.05607	3.23035	2.4683	3.93306	3.59537	3.62622	2.19915	3.55184	2.1265	2.31972	2.2623	3.19307	2.85148	2.66285	2.69825	1.40098	3.19938	3.40589	2.03613	3.38946	1.56066	3.3862	3.90876	2.06467	2.2999	2.12261	2.59725
AICDA	4.75895	2.3326	4.21839	4.22917	4.15771	5.25049	3.99392	2.60226	4.39309	3.57355	2.08008	3.21663	1.51889	4.77819	1.60419	5.14264	3.83606	5.23436	3.78391	3.67473	1.72577	3.00513	1.53688	3.58715	2.74011	6.00252	3.88028	2.49042	4.34759	3.66568	3.42863	3.48261	3.87659	3.68374	2.95663	2.18643	3.98059	3.20765	3.20448	3.21772	3.03534	3.1233	4.32322	3.01799	5.06342	2.74173	3.21214	4.22069	3.77782
AIF1	13.0133	13.0054	13.2638	13.0718	13.3922	13.4183	12.9304	11.5039	12.4014	12.4056	13.0817	11.7827	11.6787	13.2519	12.1474	13.3335	13.1369	13.559	12.4317	13.434	12.2959	13.624	12.0919	13.2379	11.955	14.0325	12.9784	12.0883	12.6758	12.5134	12.9583	12.894	13.2957	13.2721	12.8531	12.4346	13.1739	13.2671	12.7984	11.8177	12.2018	12.921	12.7859	12.9744	13.1762	12.6715	14.5261	13.0651	13.2513
AIFM1	10.845	11.3754	11.086	10.2765	9.09836	10.8923	10.9221	10.9536	11.1552	10.8993	11.2899	11.0111	10.8586	11.0208	10.7522	10.7236	10.8639	11.1664	10.9929	10.75	10.6498	10.9024	10.7155	11.6643	10.9144	10.9478	11.1833	11.0314	10.6062	10.5228	10.9608	10.5696	11.1134	10.7428	10.6106	9.94217	10.6162	11.2664	10.3964	11.5011	10.7971	10.9767	10.713	11.163	10.6994	10.5758	11.534	11.0668	10.9337
AIFM2	10.0428	10.0876	9.84821	9.76253	10.0051	9.94253	9.95158	10.1406	10.1678	10.3936	10.0943	9.76897	10.414	10.0262	10.071	10.1144	9.9413	9.70456	10.3235	9.79121	9.79605	9.77592	9.82807	10.6419	10.3503	9.55819	10.211	10.1249	10.2554	9.84369	9.86918	9.95418	10.1893	9.78199	9.95405	10.0144	10.0007	10.1381	10.0014	9.51391	10.0144	9.99431	10.0734	10.4949	9.82449	10.2999	10.1879	9.71811	9.83244
AIFM3	6.04487	6.02864	6.2242	6.35978	6.05447	6.216	6.52333	4.99942	5.71188	5.88674	6.31429	4.82371	5.13085	5.62352	5.9877	6.78537	5.62041	6.54529	5.69901	6.17799	5.66969	5.52996	5.51976	5.91281	5.40121	6.48301	5.63456	5.508	5.96277	5.44933	5.89569	5.91555	5.63375	6.20221	5.60943	5.62605	5.81208	5.50558	5.97317	6.59273	5.75015	5.53628	5.59303	5.92923	6.06907	5.63922	7.19303	6.44652	6.12683
AIG1	10.3738	10.6731	10.3122	10.4529	9.42798	10.3851	10.6618	10.4386	10.9357	10.3536	10.6911	10.4975	10.5681	10.8859	10.992	10.2504	10.7939	10.1697	10.678	10.5891	11.1539	10.6425	11.0439	10.6679	10.8785	10.8625	10.7704	10.9615	10.7224	10.627	10.8163	10.5892	10.7542	11.0277	10.9463	10.8939	10.6185	10.1143	10.8536	10.7327	10.6536	10.6778	10.5577	10.9374	10.5857	10.9695	10.279	10.6231	10.4286
AIM1	8.95842	9.21578	9.48065	8.77267	8.05104	9.01173	9.11243	9.92882	9.66228	9.65984	9.01459	8.71735	8.74085	8.64264	9.17384	9.68752	9.20085	8.96255	10.1654	9.40711	9.19813	9.56038	9.03282	9.0123	9.0209	9.85569	8.88642	8.96387	8.41016	9.35522	9.167	9.59888	9.441	9.4901	9.22009	9.1726	8.94619	9.71298	9.43258	9.6446	9.14172	9.71698	9.4861	9.4001	8.9666	8.99159	10.2709	9.79331	9.29617
AIM2	6.76059	7.32999	7.83845	7.00174	6.0446	6.79369	8.01285	8.9641	8.04855	7.68196	7.79887	7.86035	6.66395	6.32012	7.0602	6.90414	8.51675	5.8669	8.1248	6.9039	7.86511	6.43677	8.36568	7.78463	8.11164	8.77063	8.61304	7.92344	6.12728	9.86563	7.56925	8.13008	7.90996	7.06764	7.55469	5.98589	6.46282	8.92508	6.87186	7.84413	6.78266	7.9764	8.09952	7.66934	6.44264	8.629	8.92257	7.72639	7.07044
AIP	11.019	11.1849	10.8076	11.1058	11.7019	10.9848	11.1319	10.6345	11.0222	10.9646	11.0616	10.5009	10.8151	10.9658	11.0065	10.8983	10.906	11.0076	10.9556	10.8112	10.9258	10.79	11.1026	10.4314	11.1841	11.1656	11.3057	11.027	10.9693	11.234	11.2482	11.3372	10.7277	11.1008	10.5152	11.2266	11.2171	10.8956	11.0575	10.3593	10.649	10.8221	10.8586	10.9917	11.0176	10.9228	10.9921	10.975	11.1648
AIRE	3.55845	5.20771	4.5577	4.60075	7.19209	4.88032	5.09026	5.1086	5.42257	4.394	5.0912	4.71792	4.93307	4.53394	5.04283	3.78477	4.14327	3.69795	5.33053	4.09333	4.79513	4.27876	5.39362	5.0687	5.22154	5.68067	5.03626	5.24245	6.50404	5.58404	4.26646	5.46791	5.38932	4.37622	5.03313	3.88985	4.35416	4.2092	4.20696	4.21632	4.51867	4.98489	4.65203	4.62483	4.13439	5.21107	4.61691	4.05308	4.02807
AJAP1	4.32589	4.62686	5.15935	7.2544	5.58707	4.04621	6.60067	5.95045	4.61865	5.46544	4.54266	5.2449	7.93949	5.63439	6.22919	4.45465	4.93822	4.53533	5.67494	5.4063	6.28752	6.12773	4.88316	6.24722	5.68349	4.45553	6.49058	5.09075	5.53898	5.66546	4.69529	4.15014	6.41336	5.15944	7.12299	6.82389	5.65066	5.15577	5.61018	7.8439	4.8161	5.48032	6.50929	4.09586	6.33302	6.55321	4.29823	5.29862	4.75404
AK1	12.2091	11.9924	11.3051	11.3382	12.1983	11.7738	11.4167	10.1513	11.4409	11.4636	11.8358	10.8716	11.5548	11.5392	11.3548	11.7152	11.3105	11.7298	11.6126	11.6269	11.1541	10.7319	11.1973	10.762	10.8503	11.0213	10.4973	11.2881	11.7511	10.7486	12.0671	11.1718	11.208	11.8399	11.2259	11.8704	12.0753	11.3633	11.4489	10.3289	11.6175	10.8187	11.282	11.4822	11.7565	11.1443	11.1966	11.4947	12.0024
AK2	10.08	10.6116	10.3742	10.0934	10.2282	10.4024	10.6599	11.3084	10.5054	10.6877	10.7155	11.3105	10.8419	10.3619	10.6445	9.95908	10.2588	10.349	11.0116	10.068	10.4815	10.5028	10.5313	9.90374	10.5881	10.3181	10.8537	10.6648	10.3204	10.5234	9.90938	9.89089	10.2526	10.4692	10.4146	10.4644	10.3665	11.0737	10.2251	10.5449	10.6081	10.6398	10.2311	10.4923	10.4826	10.8004	10.6508	10.7308	9.89763
AK3	8.81189	8.80036	8.80636	8.13376	6.86539	8.95731	8.89709	8.85449	8.35756	8.48041	8.58364	8.55797	8.77962	8.95489	8.62397	8.17959	8.76179	8.50278	7.80351	8.55789	8.03802	8.15297	8.91992	8.81569	8.63687	8.28164	8.52033	8.41831	8.79265	8.65569	8.39587	8.89629	8.25554	9.56258	8.22167	8.12704	8.52423	8.58359	8.26485	7.70591	8.59444	8.2203	8.01761	8.57356	8.5862	8.72437	8.30097	8.65219	9.00516
AK5	1.94239	2.20064	1.88339	2.11793	2.27664	4.52106	2.06058	2.10587	2.03017	2.10505	2.67169	1.97295	3.85799	2.15129	1.97077	2.05622	1.76934	1.95562	2.14436	1.99531	2.01344	2.16304	2.03745	1.99397	2.094	2.04086	2.01632	2.9827	2.11203	1.94562	2.12435	1.89481	1.97526	1.96948	1.89186	2.09792	2.02182	2.74811	1.73812	1.74642	2.1733	1.98215	2.09274	2.16797	2.05789	2.4333	2.25278	2.13923	2.0933
AK7	7.15587	4.47319	8.01481	4.90154	6.59094	7.03484	8.65908	9.3018	6.17286	7.34153	6.00376	10.1352	9.6241	6.12103	8.50547	5.22727	4.40661	6.53004	7.75161	8.50963	9.46339	8.95307	7.98467	5.08745	6.73958	6.06325	4.80443	7.74143	8.06591	4.87205	8.18296	6.53877	8.60414	7.95913	9.58359	8.21651	4.65577	4.96467	4.96092	9.67916	9.27164	8.99735	8.79772	8.2942	7.22782	8.34884	6.3191	7.88342	4.87984
AKAP1	12.3977	11.9714	12.1025	11.3162	10.7219	12.1785	12.4913	12.4121	12.4783	12.2013	11.5789	12.0514	12.8479	11.8963	12.1541	12.2476	11.3827	11.5381	12.3747	12.1932	12.5218	12.4357	12.4724	11.6663	12.5035	12.1088	11.9057	12.1993	11.7438	11.6658	12.501	12.1522	11.9942	12.3882	12.3958	12.6752	11.7227	12.7709	13.274	12.1718	12.5461	12.129	12.3415	11.9565	12.1612	12.1714	11.5812	12.734	11.9748
AKAP10	9.34939	9.43507	9.39162	9.00504	7.1827	8.98034	8.42881	8.78048	9.51448	8.70781	8.82306	8.69777	8.89787	9.27509	9.10503	9.05759	8.20809	8.69025	9.42799	8.92579	9.22106	8.2402	8.94072	9.42748	9.42343	8.64267	8.77075	8.76637	8.92901	9.69889	8.44426	8.7092	8.91271	8.18443	8.68244	8.9492	8.93117	8.8244	9.17761	9.10213	9.3037	8.31398	9.43368	8.60167	8.88498	8.81406	9.40646	9.18093	8.85371
AKAP11	10.6084	10.2709	10.3774	11.2629	8.55495	10.4367	10.1295	10.1585	10.4375	10.5393	9.50592	10.3835	10.0963	10.9557	10.7177	10.6484	11.0675	10.3597	9.916	10.6979	10.4884	10.3162	10.4382	10.8815	10.2441	10.2846	10.4147	10.2782	10.7672	11.0542	10.8644	10.2955	10.5424	10.6955	10.5372	10.3455	11.5286	10.4069	11.8176	10.2487	10.3283	10.2897	10.8593	10.5282	10.7863	10.807	9.9781	10.1639	10.6891
AKAP12	9.64754	10.6997	9.49391	10.3229	8.79246	10.3345	8.97542	11.027	10.5736	11.0503	10.3232	10.9925	9.92969	10.4668	8.67212	8.02263	10.3474	9.10473	9.28101	9.85024	9.87062	9.1994	10.8247	10.783	11.0268	9.42767	10.0496	9.07751	8.31801	10.6009	10.199	10.4079	10.0399	10.5152	9.88358	10.6313	9.58779	11.4541	9.72023	9.84486	10.2748	9.26378	9.67103	9.59967	9.45468	10.224	10.1099	10.5324	9.86844
AKAP13	12.8587	12.5927	12.4744	12.3276	11.2477	12.3388	12.3275	12.7733	12.2419	12.9032	12.7164	12.1418	12.2088	13.1346	12.4035	13.1041	12.4662	12.4773	13.396	12.404	12.0897	11.9824	12.1486	12.8235	11.9358	12.2993	12.0639	12.204	12.8511	12.1454	12.5768	12.2068	12.2723	12.2017	11.7422	12.2952	12.5005	12.5103	12.3651	12.2359	12.2067	11.8648	12.0155	12.2262	12.6674	12.42	12.3363	12.5582	12.5588
AKAP14	7.24113	2.55643	8.55091	4.78026	6.02186	7.53932	9.30097	9.78318	6.52619	7.50898	6.86693	11.1362	10.1693	6.2207	9.32641	5.03362	3.55915	7.21364	8.36198	9.15709	10.5471	9.68056	8.7189	4.4634	6.98104	6.30473	5.14521	8.47728	8.84709	4.73652	8.57263	6.67562	8.86539	8.56487	10.5092	9.05029	4.079	6.93527	8.73125	10.4948	9.96523	9.63719	9.64029	8.98525	7.93426	9.51741	6.41398	8.34936	3.82359
AKAP3	3.22105	1.6051	3.19206	2.76371	2.84558	3.00944	2.29894	2.87571	2.10142	2.83153	2.56765	3.98525	4.01301	2.30575	2.96142	3.30465	2.7437	3.05862	2.37481	3.10372	4.68428	3.82882	3.12047	2.56285	2.16348	1.38129	2.73663	2.70537	2.40432	1.9824	3.66102	2.72494	3.84948	2.73429	2.46694	2.6107	1.94827	2.09768	3.00705	3.30027	3.49834	3.94187	3.78467	3.28789	3.71312	2.43753	2.28676	2.66066	2.34267
AKAP4	1.82639	4.66382	2.13062	2.01094	3.29882	2.94504	1.98191	2.20944	2.24675	2.02876	1.74324	3.52771	3.63422	2.18547	1.90731	2.21991	2.50049	1.86215	2.08437	1.83781	1.91481	2.02593	1.89911	1.89968	2.63293	1.98153	1.55605	1.71606	2.25299	1.94545	1.93853	2.21164	1.97229	3.22118	2.02225	3.06488	1.76719	2.43277	1.6295	1.63685	1.9623	1.83213	1.96993	1.69699	1.9257	2.13889	2.27021	1.99457	2.27493
AKAP5	2.73368	2.23611	3.10465	3.54975	4.18738	2.81748	2.3493	2.21013	2.64794	2.40105	3.20151	2.48134	2.42508	2.64918	2.16782	2.53465	2.7559	3.88351	2.35271	3.31883	1.91793	2.13794	1.94675	3.21657	2.06851	3.21569	1.86298	2.35643	2.78633	3.40299	3.10744	3.19315	2.77347	2.60733	2.53899	2.41501	3.6223	3.18542	3.02338	2.70255	2.69018	1.9327	2.00462	2.48444	3.2477	2.34511	2.519	2.60981	2.95123
AKAP6	3.63751	2.25433	2.80866	2.11677	4.62714	2.13968	2.06255	2.99565	2.16532	3.22598	2.09539	3.88315	2.5705	2.18397	2.39726	2.24768	1.72322	1.71248	2.20645	4.36256	4.51413	3.20959	1.88411	1.91267	1.98326	1.89934	1.98193	2.70676	2.18735	2.1435	2.14742	2.02327	3.40825	2.08611	2.15713	2.13324	1.96951	1.49189	3.24329	3.20862	2.10627	1.78614	1.99278	2.90783	2.06451	2.25117	2.36387	2.11677	2.11
AKAP7	9.08834	8.31322	9.01078	8.68256	7.03519	8.50993	8.50336	7.6701	8.97984	8.30227	8.5878	8.40875	9.17131	8.73189	9.19806	10.0246	9.64711	9.22276	8.92096	9.66443	9.05509	8.88499	8.67401	9.41373	8.2086	8.86786	7.66024	8.38095	8.63608	9.23319	9.09194	9.17639	8.91363	9.37996	8.7268	8.81827	9.17715	8.74591	8.57477	9.23445	8.94126	9.17411	9.02343	8.66388	8.84279	8.78524	9.03694	8.93157	8.9371
AKAP8L	10.0393	10.013	10.0277	10.4658	9.82972	10.3399	10.3074	10.3383	10.1465	10.4656	9.77172	10.3228	10.8741	9.7943	10.1788	10.0742	9.8314	9.78044	10.4978	9.93969	10.2064	9.83601	10.3834	9.579	10.0725	9.97815	10.0086	10.1689	10.1553	10.165	10.7897	10.2762	9.97225	9.97056	10.1477	10.1192	10.043	10.4314	9.82634	10.403	9.98079	10.2691	10.3289	9.9195	9.88901	10.0683	10.0274	10.2703	10.0467
AKAP9	12.1279	11.1247	11.8147	11.3126	8.63712	11.6514	11.5379	11.7032	11.6524	11.5336	9.98937	12.3515	12.6364	11.4951	11.9933	11.7865	11.2847	11.1277	11.6163	12.1319	12.2637	12.0302	11.4758	11.5714	10.9217	11.3806	10.8974	11.3802	12.1529	10.8997	12.2718	11.5909	12.0735	12.0426	12.3698	11.1267	11.9853	12.0584	11.7908	12.5864	12.8044	12.4076	12.1642	11.7352	11.891	11.7809	10.8647	11.5915	11.5184
AKR1A1	9.67107	9.78471	9.84649	9.5789	9.96424	9.81638	9.71392	9.17641	9.23942	9.299	9.98628	9.6508	10.0803	9.46189	9.72781	10.0427	9.71738	10.0516	9.73937	9.70285	9.73884	10.1042	9.56102	9.62412	9.65132	9.99484	9.8136	9.59291	9.5988	9.43622	9.54223	9.74781	9.62046	9.77404	9.8016	9.9225	9.53551	9.51982	9.82276	9.82507	9.78605	9.79189	9.83893	9.7867	9.56579	9.53357	10.2273	9.48145	9.43944
AKR1B1	10.997	11.3965	11.423	11.6773	10.9552	11.3875	11.0401	10.9915	11.173	11.6237	11.4541	10.7304	11.1499	11.0373	11.2439	11.8586	11.2422	12.093	11.0901	11.1011	10.9026	11.3462	10.9148	10.7357	11.0397	11.1345	11.0344	11.1007	11.4748	11.0754	11.1983	11.502	11.155	11.1063	11.1598	11.4299	11.3088	11.1062	11.6025	10.4345	10.8115	11.1444	11.1048	11.2031	11.2778	10.8557	11.2731	11.4628	11.2051
AKR1B10	4.23545	4.34014	5.3953	3.14903	3.62555	2.12247	6.86158	6.0453	4.29216	3.28691	4.71634	6.31432	6.01844	3.83381	6.0014	2.14111	2.36835	4.68716	4.98887	3.25308	5.72673	6.15776	4.63882	4.44938	7.17527	3.57687	5.28024	5.90036	1.78409	3.60187	3.32233	5.36694	5.10363	3.4839	6.89295	4.75854	2.12498	3.65439	1.64478	6.60127	4.14204	6.1167	4.77602	5.16106	2.23342	4.49322	6.53472	4.65409	2.12848
AKR1C1	11.0976	10.3822	10.6914	10.1789	11.0533	10.6014	11.4782	12.8964	10.8494	11.188	10.6503	12.4202	11.3085	10.6277	10.9586	10.8597	9.90368	10.0959	10.9018	10.9116	11.2838	11.21	11.5806	11.2944	11.3148	10.6567	11.2544	11.2405	10.6502	11.1135	11.0999	10.7344	11.3431	11.3209	12.1188	10.8987	10.1491	10.5575	10.5543	10.5678	11.3354	11.3881	11.3635	11.3392	10.945	11.6207	10.6547	10.9415	9.96667
AKR1C3	11.6811	10.9337	11.3741	13.1639	9.31039	11.1621	11.8831	12.367	10.9265	11.4481	11.4774	12.3157	11.9655	11.9817	11.5368	12.7055	10.4675	12.2096	10.8233	11.2997	11.8743	11.627	11.8555	11.6992	11.7881	10.7816	11.7435	11.5382	11.4357	11.4202	11.0498	10.956	11.351	11.715	12.2662	11.4585	11.4279	11.1749	11.8549	12.5668	11.8794	11.7894	11.8828	11.6935	11.2915	11.8511	10.7218	11.4168	11.2583
AKR1C4	1.89676	2.27425	1.63238	2.71285	4.80177	1.55443	1.92359	2.52672	2.4308	2.041	2.1284	1.98	1.95025	2.96836	2.24884	2.58242	1.72203	1.8787	1.97488	1.98508	2.55508	2.19516	1.99471	2.04571	2.08342	2.05157	1.99892	1.58882	1.63714	2.03986	2.0545	2.19195	2.09008	3.83819	2.56706	1.82493	1.42156	2.86714	2.40922	2.56645	2.19615	1.93646	2.10625	2.25836	2.16934	1.75472	2.61991	2.20707	3.5371
AKR1D1	1.5778	2.44684	2.27976	1.8671	3.45325	1.84987	1.85044	1.87934	1.93013	1.84507	1.77476	1.64934	4.0584	1.86589	1.82105	1.88996	1.63157	1.64036	1.90091	1.58889	1.82489	2.23354	1.80139	1.89907	1.96929	2.03423	1.67285	1.65071	1.87572	1.83265	1.87322	2.52457	1.83361	1.83232	1.84569	1.87451	1.57458	2.19489	1.44363	2.07816	2.13243	1.58572	2.05535	1.80721	1.83265	1.91106	2.55677	1.8704	1.99768
AKR7A2	11.7938	11.6158	11.8295	11.5858	12.0436	11.6483	11.8887	11.2612	11.63	11.3433	11.6	12.0752	12.2721	11.4319	11.678	11.8271	11.8733	11.5917	11.6957	11.8599	11.9078	11.8482	11.6974	11.7731	11.8204	11.4703	11.759	11.7083	11.8845	11.7116	11.7638	11.8572	11.8772	12.0987	11.8895	11.8801	11.859	11.4363	11.8013	12.3811	11.9749	11.8404	11.9543	11.9413	11.7419	11.555	11.4726	11.5167	11.4947
AKR7A3	9.70379	9.67138	9.57514	9.23502	9.90149	9.61758	9.82861	9.06599	9.49011	9.13729	9.75738	9.88104	10.2919	9.27232	9.75033	9.61214	9.54726	9.55974	9.73477	9.99867	9.99898	9.83076	9.72159	9.42722	9.90895	9.51571	9.82655	9.63079	9.9339	9.69247	9.61303	9.82567	9.59717	10.2436	9.95329	10.205	9.23876	9.48571	9.48356	10.2149	10.0306	9.88508	9.98489	9.68689	9.50479	9.55678	9.51874	9.63593	9.43768
AKT2	9.81367	10.0792	9.82358	9.45637	11.0505	9.77203	9.34186	9.72886	9.65853	9.43156	10.0636	9.32742	9.75514	9.39775	9.82127	9.34128	9.5358	9.79493	10.0969	9.80829	9.75145	9.74638	9.08732	8.80065	10.0896	9.70155	9.76886	9.89867	8.97913	9.73045	10.2195	10.1853	9.70575	9.94892	10.0497	9.88438	9.5665	9.61954	10.1225	10.1635	9.03659	9.90022	9.96617	9.8477	9.36872	9.4659	9.86315	9.92466	9.59485
AKT3	7.85568	7.01788	6.80959	8.21932	6.10361	6.87507	7.08905	7.85882	7.30656	7.79497	7.16957	7.13205	6.82972	7.19074	6.72214	6.64293	7.88415	6.66208	7.18774	7.25009	7.16467	6.47605	7.34544	7.86681	7.77457	7.69154	7.16983	7.05323	6.71116	7.86574	7.34747	7.51596	7.22473	7.47217	6.98879	7.83293	8.11012	7.57208	7.07916	7.15829	6.85577	6.25867	7.38205	6.53261	7.78928	7.27531	7.29348	7.00448	7.67582
ALAD	9.44159	9.64031	9.44239	9.53221	8.25771	9.26224	9.41054	8.51255	8.91278	8.64182	9.59155	8.55522	9.43331	9.32358	9.24209	9.0607	9.13276	9.39036	8.56107	9.15271	8.91159	8.62134	8.80265	8.59622	9.15321	8.79867	9.09367	8.99601	9.41825	9.3084	9.1713	9.20489	8.93977	9.05411	8.76635	8.9139	9.15453	9.00893	9.00267	9.02876	9.13941	8.99889	8.8703	9.14579	9.65102	9.14144	8.84311	9.15537	9.48917
ALAS1	10.0675	9.87871	10.3223	10.718	8.82387	10.5663	9.48362	9.15469	9.08012	10.1085	10.8222	9.9491	9.80351	10.3569	9.75856	10.0224	10.2087	11.3871	9.42465	9.98049	9.2473	10.0057	8.99285	10.1049	9.30658	10.2973	9.18142	9.30212	10.4302	9.18181	9.89734	9.77179	9.61113	10.1469	9.81032	10.0176	10.0314	10.8681	9.56021	9.56689	9.73876	9.68482	9.86497	10.0859	10.0963	9.36738	10.5661	9.95002	9.94557
ALAS2	7.2066	6.97434	6.62072	8.56431	11.9551	7.18255	5.34265	8.51952	8.01875	7.95996	8.20166	6.12676	5.95973	9.33352	7.89435	8.10132	7.45117	10.205	4.94853	6.79946	5.08954	4.22908	7.52769	8.59312	5.36751	6.48475	8.71574	7.20189	9.48801	7.92966	5.5006	5.85733	5.5226	8.26006	8.26617	8.78954	7.60727	6.6997	8.87491	8.77401	10.13	6.41165	9.57202	8.2278	6.69767	7.70444	9.18336	9.04476	8.72423
ALB	4.7212	4.74115	4.68212	3.69535	5.03205	4.04108	4.12169	3.64504	5.07318	4.31657	3.57686	4.6084	5.47115	4.73582	4.89828	4.00569	4.63043	3.84774	5.60648	5.13246	5.84577	5.48604	4.6625	4.55695	4.88055	4.30334	3.53345	4.60218	4.62853	4.714	5.13401	4.75832	5.56996	5.30156	6.38138	3.83938	4.24874	4.32101	3.92052	4.84438	6.21451	5.09792	5.68289	4.90054	4.18704	5.82841	4.26222	5.00207	3.54023
ALDH16A1	9.23463	9.44035	9.73875	9.41937	10.4622	9.3707	10.0864	9.32048	9.57951	9.51285	9.58445	9.22665	9.46129	9.41976	9.49204	9.41418	9.22155	9.50055	10.1126	9.28467	9.42297	9.56682	9.7067	9.22991	9.51762	9.59289	9.88631	9.65102	9.06053	9.80001	9.49931	9.33307	9.21873	9.50295	9.40587	9.30374	9.28131	9.72335	9.51322	10.0416	9.12449	9.74753	9.53353	9.60716	9.34643	9.64103	9.64375	9.42793	9.04795
ALDH18A1	9.88515	10.8361	10.1221	9.86468	9.71282	9.93129	10.4597	10.8312	11.1563	10.315	10.8768	10.6037	10.3657	10.1189	10.5001	10.4671	10.9021	10.7371	10.812	10.3966	10.6777	10.6507	10.9371	10.5694	10.9466	10.1542	10.7922	10.9261	9.80554	10.8264	10.215	10.8282	10.9763	10.5542	10.7023	10.4755	9.84493	10.6916	10.1508	10.5228	10.664	10.8411	10.6392	10.5332	10.3322	10.0644	10.6652	10.6297	10.035
ALDH1A1	11.7983	10.6112	11.9829	11.6137	10.2048	11.4812	11.5571	12.0847	11.2714	11.2973	10.7213	12.9053	12.712	11.4599	12.4394	11.7137	11.2811	11.3958	11.2226	12.3398	12.5146	12.1472	11.7113	10.772	10.7798	10.9495	11.0681	11.6465	12.4148	10.8417	12.1915	11.4921	11.4774	11.9765	12.6235	12.3628	11.7518	11.3579	12.1012	11.9546	12.6113	12.3895	12.4741	11.7652	11.9418	12.2587	10.9326	11.8411	11.286
ALDH1A2	5.30904	4.62129	5.98379	6.93748	5.24327	5.75324	4.55244	5.76615	4.55553	4.88196	4.66767	4.58453	4.0638	6.93324	5.30391	2.87427	4.84774	5.37499	3.63739	5.71149	3.94763	5.52021	5.49499	6.00316	5.46692	4.93581	5.65449	4.83752	4.77037	5.99949	5.59496	5.36797	6.20085	4.95785	4.1086	4.70553	4.40174	4.271	4.54787	4.71811	5.20274	4.73549	4.35017	4.86285	5.56307	5.06276	5.33599	4.89445	3.25983
ALDH1A3	8.10249	10.3217	10.5658	9.12749	9.48344	8.38686	10.7674	11.8418	10.2502	10.4457	10.9742	10.8343	10.7578	10.1834	10.5271	8.59414	10.2103	8.48571	11.4344	9.92104	10.2945	10.4706	10.3056	11.615	10.5589	9.47475	11.3394	10.7846	9.29336	9.77324	9.21434	10.7893	10.8384	9.86715	10.4245	9.47705	8.70251	10.6387	9.80924	10.6631	10.2727	10.685	9.7669	9.83998	9.85052	9.84019	10.5331	10.0538	8.91978
ALDH1B1	6.85805	8.27849	7.30316	6.83559	7.1434	7.12976	7.38368	7.75373	8.2648	8.39387	8.36781	8.05049	7.39272	7.34816	8.39439	6.52871	6.75617	7.61662	7.38981	7.81806	7.68993	7.69731	8.31938	7.0502	8.42264	7.70459	8.22314	8.5073	7.2092	7.76902	7.55127	8.28751	7.4812	7.52586	7.42522	7.42727	7.02071	7.12586	7.63401	6.85811	7.05775	7.64877	7.55014	7.22297	7.69249	6.88499	7.55331	7.39552	7.5588
ALDH1L1	3.99929	4.58649	5.74943	3.99019	5.51348	5.40935	8.85747	8.59441	5.75855	5.83473	5.53381	9.26373	8.99115	4.64424	8.18671	4.94367	4.01875	4.38956	6.85319	5.00547	8.40191	6.97967	7.28421	4.57244	7.20522	4.18178	7.00562	7.12915	6.698	6.59065	6.65026	6.10704	6.16451	6.13173	7.72308	8.08397	4.47103	5.06048	6.93449	8.66778	7.43699	6.97686	6.68928	6.43637	5.30517	7.27912	4.54283	6.40257	2.89145
ALDH2	13.7435	12.4435	13.4021	13.1062	13.0829	13.4545	12.8852	12.0782	12.1533	12.5283	12.7262	12.2307	12.5234	12.8516	12.6785	13.231	12.9755	13.419	12.0396	13.0816	12.1986	12.3716	12.3556	12.5773	12.0823	13.4414	11.8333	12.3329	12.9497	12.1508	13.2998	12.6157	12.6759	13.408	12.8638	12.7906	13.305	12.47	12.9684	12.8118	12.4109	12.3505	12.6839	12.767	13.34	12.4476	12.4355	12.8247	13.1953
ALDH3A1	4.76426	6.2474	8.18207	7.49568	8.96658	7.00066	8.55875	7.14788	7.56711	5.58242	6.7463	8.31927	8.94832	4.36413	8.25955	4.9153	4.21027	5.73273	7.31553	6.13055	8.56418	8.00328	6.60521	2.65721	6.15773	6.14297	7.17238	7.17238	6.15584	5.54544	7.01336	7.09441	6.44651	6.38262	8.75755	7.24341	3.83718	5.12417	7.37394	7.96589	7.90666	7.95395	7.36727	6.72259	6.65335	8.00192	5.5641	6.971	4.2437
ALDH3B1	10.4012	9.16412	10.3837	9.87593	10.6712	10.3583	9.69161	10.1342	9.28904	9.68543	9.32109	11.0184	10.8296	9.5226	9.95278	9.60034	9.25381	9.84485	9.71157	10.7803	11.139	10.59	9.8764	8.88326	8.95412	9.30928	8.36014	9.85652	10.1899	8.37689	10.533	9.6589	10.0204	10.1047	10.9494	11.1517	9.81429	9.11262	10.2861	11.1718	10.9741	10.1355	10.4872	10.1089	10.0096	9.87416	9.55387	9.88724	9.49144
ALDH3B2	4.08642	4.6982	4.1782	3.75182	4.58606	4.71908	4.55753	4.51332	4.02196	4.15544	4.6297	4.87225	5.44142	5.45557	4.99983	4.39387	3.69087	4.05301	4.58418	3.6713	4.98669	4.90823	4.09045	4.51121	4.77643	4.28585	4.92342	4.41202	4.45872	5.26137	4.00935	4.12927	4.6126	4.43525	5.48434	3.93966	3.81404	4.03847	5.73419	5.18938	4.86238	5.42427	4.52077	4.70493	4.20898	4.20449	3.09055	4.167	3.70454
ALDH4A1	4.15698	5.3295	4.68145	4.43844	4.70275	4.78039	4.99786	5.13048	5.29781	4.5649	5.30405	3.99206	4.27404	3.67451	4.18304	4.89069	4.2887	5.26704	4.95633	4.15616	4.35268	5.35088	4.39273	4.44596	5.19326	4.64633	4.49652	4.58544	4.34753	4.63576	4.41441	4.26032	5.08838	3.64528	5.37311	4.58487	3.86087	4.56303	4.85101	4.6759	4.83466	5.05266	4.44773	4.82021	4.98831	3.40123	5.36611	5.28845	4.47051
ALDH5A1	8.5482	8.17843	8.30569	8.02981	6.85579	8.07866	8.57243	7.28863	8.70445	8.17193	8.35979	8.23406	8.94541	8.37177	8.61319	8.3965	8.60757	8.70335	8.57243	8.48755	8.48546	8.41331	7.96238	8.05243	7.82475	8.20876	8.07297	8.12062	8.71674	8.48506	8.97718	8.47337	8.48521	8.5967	8.36728	8.17217	8.75633	8.67274	8.32143	8.18441	8.78478	8.83536	8.77092	9.03248	8.84321	8.76304	7.95024	8.25234	8.53976
ALDH6A1	9.06103	9.30937	8.62517	8.98476	8.65425	8.91559	8.83836	9.22353	9.11389	9.17106	9.05901	8.74474	9.33975	8.74896	8.87114	8.89101	9.0333	8.94484	9.6786	8.88642	9.34263	8.8699	9.02459	9.51899	9.14625	8.72187	9.56995	9.1725	9.07875	9.23396	9.27655	9.24799	9.06323	9.25221	9.11749	10.1427	9.30312	9.2133	8.93623	8.90765	9.08148	8.88193	8.88674	9.45473	8.93943	9.19708	9.14816	9.17945	8.6202
ALDH7A1	10.693	10.7132	10.4709	10.8962	9.61315	10.5596	10.7539	10.533	10.9993	10.4586	10.5775	10.6252	11.2745	10.2952	11.2563	10.7001	10.6216	10.6676	10.9503	10.5789	10.9729	10.8649	10.7156	10.1428	10.9058	10.5347	11.2374	10.6252	10.8586	10.4286	10.7647	11.0424	10.4852	11.0618	11.3579	10.8364	10.4709	10.6043	10.7971	10.8623	11.0149	11.2611	10.7333	10.6542	10.3794	10.7211	10.3973	10.6705	10.3315
ALDH8A1	3.15457	4.53173	4.37798	4.92063	3.90319	2.40913	3.52113	6.14067	4.93796	4.548	2.49816	4.2759	2.70451	3.87058	3.81272	4.7345	3.63231	4.10687	4.60384	3.8642	4.4872	4.8652	3.29162	4.56228	4.75036	5.46587	5.76085	2.75191	3.68724	4.39501	5.04103	3.65417	3.75018	3.95065	5.29826	3.97923	5.11893	3.75405	3.75101	3.76367	3.04134	4.46646	4.95905	4.47697	4.19503	3.93959	3.6483	4.59289	4.67166
ALDH9A1	10.3777	9.89101	10.3659	10.5375	8.97787	10.436	10.0872	9.78143	9.32913	9.84583	10.2944	10.4164	9.49047	10.2509	9.91629	9.99818	10.3039	10.5887	9.36213	10.5874	10.024	9.65794	9.5085	9.92441	10.1275	9.65225	10.131	9.14078	10.1363	11.0106	9.69569	10.3506	9.89514	10.2635	10.3024	10.4545	10.2175	9.78278	10.1955	10.5486	10.166	9.94829	10.2046	10.0145	10.2592	10.0203	9.8109	10.2372	10.0843
ALDOA	13.2348	13.177	13.3971	13.5594	14.1828	13.5964	13.3619	12.9667	12.8523	13.3325	13.5009	13.1918	13.4021	12.986	13.4206	13.2724	13.1016	13.6112	13.1008	13.4328	13.225	13.435	13.5452	13.1038	13.5583	13.4088	13.3893	13.3463	13.1303	13.4067	13.1585	13.0741	13.2402	13.3002	13.3612	13.3138	12.9984	12.8649	13.4775	13.3871	13.0835	13.2103	13.1341	13.2004	13.3781	12.8652	13.6324	13.3795	13.0475
ALDOB	2.01167	1.79087	2.94763	2.16501	4.73715	2.12422	2.17092	2.16811	2.20455	2.40499	1.94332	2.86188	1.93518	2.20697	2.09622	2.26927	2.12885	2.43211	4.62255	1.31764	2.87487	3.43137	2.72466	1.48628	1.96223	2.26547	3.49451	2.34485	2.23923	2.11715	2.07907	2.05078	2.17616	2.11502	2.20619	2.18623	2.1988	3.26358	2.05545	2.35655	1.66948	3.85244	3.32076	3.29374	2.12209	2.25348	2.37363	2.15726	2.15629
ALDOC	7.67449	7.03764	6.84502	6.97779	7.31441	7.04978	7.00535	6.62881	7.93336	7.40362	7.75013	7.213	7.5416	6.82073	8.00724	6.65574	7.46268	7.29273	7.30852	7.43705	7.62467	7.09633	8.51227	6.70659	8.7432	7.87917	8.45778	8.09596	7.42732	8.82349	7.86415	8.01416	7.76322	7.5494	7.76108	7.86037	6.95522	7.01147	7.81659	7.03423	7.37865	7.01031	7.38072	6.70747	6.89901	7.84615	7.58778	8.12491	6.99843
ALG1	6.81098	6.0845	6.67936	7.29283	6.91427	7.40402	7.60246	7.11835	5.37253	6.23295	7.86995	6.68812	6.37551	7.49257	6.88161	7.35929	7.15002	7.48438	7.12832	6.73204	6.13455	7.09213	7.31624	6.95458	6.2738	7.15632	7.81617	7.67851	7.29889	7.97956	6.12945	6.67898	6.34512	7.64869	7.34708	7.02011	6.81613	6.50574	7.5912	7.37394	7.52947	6.52377	7.58422	7.69053	7.79436	8.00836	7.64216	7.07576	6.43553
ALG12	7.29833	7.52282	7.09443	7.38971	8.06663	7.58706	7.3653	6.96554	7.55024	7.54879	7.81142	7.08066	7.22345	7.20586	7.35534	7.65334	7.57324	7.50765	7.48982	7.39203	7.449	7.33397	7.51705	7.49247	7.60134	7.39487	7.69726	7.59524	6.82752	7.42026	7.31156	7.52009	7.37239	7.46131	7.48695	7.65662	7.18027	7.43017	7.51125	7.37956	7.38537	7.58568	7.28982	7.58611	7.02855	7.16017	7.45558	7.21568	7.4609
ALG14	8.01549	8.94266	8.72618	7.96719	8.10822	8.32255	8.31315	8.01333	8.65825	8.09057	8.88148	8.43512	8.52869	8.67662	8.58348	8.33942	8.30085	8.96567	8.33857	8.33254	8.13231	8.76144	8.52943	9.10172	8.76479	8.73734	8.8222	8.81387	8.33654	8.46727	8.20613	8.1587	8.56276	9.03187	8.74135	8.56287	8.33538	7.88843	8.64217	8.77767	8.18699	8.83319	8.38733	8.80137	8.45862	8.66775	8.36303	8.18241	8.24297
ALG2	9.7964	10.2812	10.0068	9.45642	8.77608	9.93307	9.68153	10.7567	9.99096	9.99911	10.3079	10.0821	9.63172	10.0478	10.0988	9.79193	10.2096	9.96962	9.99672	9.7989	9.86813	9.97379	9.60426	9.76623	9.6785	9.63276	10.2393	9.69771	9.90052	9.8144	9.57113	9.81188	10.1519	10.1348	9.93558	9.59936	9.95173	9.94923	9.87459	9.68599	9.9731	10.2222	9.86285	10.3391	10.0859	9.88147	10.1053	9.98215	9.94206
ALG3	9.96535	10.6537	10.2612	9.53295	11.463	10.3288	10.643	10.2872	10.6404	10.5304	10.7925	10.2105	10.2678	9.94819	10.2409	10.4457	9.94402	10.1297	11.1775	10.1588	10.3809	10.5745	10.227	10.6324	10.4256	10.101	10.4779	10.272	9.456	10.1831	10.02	10.1028	10.5636	9.87929	10.5436	10.2225	9.37906	9.7459	10.7177	9.75108	10.3868	10.5016	10.3559	10.5352	10.1759	10.1857	10.6587	10.0411	9.78925
ALG5	11.9167	12.0869	12.191	11.6654	11.2168	12.1087	11.8463	11.8265	12.2182	11.9807	12.0606	11.9011	11.8227	11.9634	11.9638	12.0785	12.0059	12.203	12.2091	11.9569	11.8899	12.1699	12.3227	12.3978	12.1631	11.813	12.3469	12.2655	11.9408	12.1459	12.1503	12.0578	12.2568	12.5067	12.1713	11.9717	11.947	12.2734	11.9616	11.9563	12.174	12.3669	11.9463	12.2885	11.8227	12.0783	11.9089	11.9653	12.0215
ALG6	8.7256	8.51676	8.41137	9.02465	7.02772	8.48403	8.78031	8.17346	9.05008	8.75547	7.8913	8.97616	8.69369	8.39505	9.01069	9.33538	9.17345	8.88202	9.04584	8.71495	9.08611	9.19096	8.87439	8.98932	8.7511	8.87756	9.22411	8.80527	8.6838	8.95765	8.97334	9.03297	9.06452	8.66654	9.28312	8.25899	9.09604	8.94017	8.38408	8.65634	9.05284	9.4662	9.04434	8.97193	8.67737	8.6973	8.7563	8.4845	8.66779
ALG8	9.99954	10.332	10.3607	10.4184	9.58622	10.3174	10.8034	10.3608	10.3459	10.225	10.4333	10.7247	10.6433	10.2543	10.4009	10.7718	10.4376	10.6667	10.755	10.2463	10.4237	10.6288	10.5894	10.7071	10.4912	10.0181	10.8773	10.6495	10.3009	10.4598	10.0549	10.1473	10.4431	10.2555	10.685	10.2939	10.2178	9.94806	10.3178	10.4924	10.504	10.5779	10.3254	10.6083	10.452	10.4896	10.5608	10.3317	9.8856
ALG9	7.59886	8.51173	7.93143	7.76469	6.41311	7.74734	7.91853	7.83148	8.18491	7.89102	8.43978	7.77482	8.01679	8.25845	8.09003	7.45992	7.69972	8.05073	7.96966	7.60657	7.80682	7.8248	7.97023	7.55976	8.14536	8.23156	8.16296	8.21393	8.42611	8.03921	7.88414	8.00881	8.19504	7.74657	7.64892	7.58459	7.97231	7.71924	7.85939	7.77901	7.75572	7.80881	7.82223	7.85758	8.13087	8.48507	7.28489	7.85297	8.02232
ALK	1.29501	3.24563	5.3296	5.56916	2.82589	2.09389	5.44069	2.56097	2.86341	2.49539	4.02527	3.75431	4.26571	2.27534	4.49118	4.28796	2.4314	3.13487	3.34749	1.4366	4.26301	3.96383	2.80627	1.6884	3.08868	2.86673	2.76603	2.96273	2.42219	3.03698	2.58011	3.10074	3.12785	2.06027	3.07771	2.14997	2.8022	3.71326	3.28471	1.54865	3.62766	4.57993	4.10001	3.51767	2.29614	4.0588	2.58536	2.34143	2.06386
ALKBH1	7.26771	7.54195	7.16355	7.28007	6.66745	7.85254	7.51258	7.81415	7.50138	7.74672	7.55018	7.40313	7.44019	7.45205	7.28194	7.89387	7.36594	7.50449	7.6663	7.34059	7.22208	7.35164	7.25138	7.29701	6.90894	7.31262	7.22288	7.27794	7.2698	7.319	7.50618	7.3358	7.36153	6.96597	7.26967	7.31447	7.32932	7.42783	7.51204	7.24636	7.32787	7.1181	7.32558	7.10156	7.24261	7.43912	7.39792	7.27341	7.54911
ALKBH2	9.57321	10.2105	9.75211	9.67249	9.40991	10.0419	10.1978	10.8035	10.2394	10.4906	10.2458	10.4533	10.1422	9.88465	9.855	9.63197	9.87443	9.59417	10.6805	9.71266	10.136	10.1153	10.0041	10.2238	10.3832	10.1739	10.3914	10.1932	9.72104	10.3666	9.88099	9.69919	10.0185	9.99723	10.0115	10.0478	9.72286	10.1334	9.65299	10.4948	10.128	9.96985	9.93905	9.71313	9.84661	10.4129	10.0165	9.99947	9.67285
ALKBH3	8.12107	7.89684	7.94985	8.32858	7.40075	8.05976	8.03365	7.50812	7.44017	7.95173	8.30986	7.92595	8.15458	7.94621	8.36426	8.27781	8.24132	8.33748	8.35765	8.37099	8.18652	8.25613	8.22163	8.09343	8.19875	8.30604	7.88234	8.11394	8.0276	8.19026	7.67552	8.17198	8.36602	8.46712	8.38541	8.331	8.12851	7.87747	8.32225	7.86835	8.34738	8.41675	8.20255	8.17848	7.84445	7.87562	8.29312	8.02639	8.3571
ALKBH4	8.32983	8.14032	8.07029	8.25394	9.76187	8.51769	8.19397	7.70112	8.34403	8.38133	8.30405	7.82893	8.08575	7.94621	8.15638	8.0323	8.0344	8.28043	8.01098	8.29493	8.16383	8.13815	8.66887	7.95765	8.66835	8.31461	8.28979	8.40534	8.17051	8.51755	8.4052	8.3483	8.13373	8.3359	8.43253	8.74105	8.4061	7.82299	8.07021	7.94425	8.27629	8.03894	8.20618	8.21102	8.03137	8.26247	8.21529	8.19543	8.36895
ALKBH5	10.3001	9.92892	10.2401	10.2039	10.0065	10.1074	9.90382	10.3584	10.091	10.3879	10.2519	10.2948	10.2283	9.78213	10.2623	10.1679	9.99328	10.0928	10.2225	10.3578	10.4382	10.198	10.1965	9.42264	10.3124	9.67321	10.1662	10.0806	9.84615	10.072	10.54	10.7022	10.1983	10.0902	10.4795	10.5091	10.1447	9.7406	10.3769	10.3123	10.5018	10.2893	10.2596	10.0403	10.1362	9.62213	9.89715	10.2863	10.2028
ALKBH6	7.27184	7.62109	7.3544	7.25012	7.54926	7.4988	6.91851	7.04784	7.3788	7.12951	7.82358	6.98117	7.58693	7.17911	7.19234	7.51343	7.53613	7.61704	7.2125	7.10789	7.149	7.24012	7.13359	7.20405	7.39597	7.26601	7.50812	7.25868	7.09445	7.25326	7.20827	7.35776	7.10843	7.35343	7.49414	7.3415	7.60668	7.62735	7.29444	7.52221	7.51209	7.14495	7.14475	7.34855	7.24513	7.13022	7.47387	7.11982	7.27635
ALKBH7	10.8437	10.9727	10.7032	10.6759	11.5812	10.9275	11.1504	10.694	11.1574	10.9077	11.1822	10.7152	11.1536	10.9434	11.0503	10.5867	10.8717	10.8266	11.4315	10.6672	11.1069	11.1004	11.1459	10.7138	11.156	10.7505	11.0548	11.1565	11.0349	11.0653	11.1971	11.0363	11.0128	10.9368	10.6992	11.1642	10.968	10.7616	11.249	11.1349	10.9658	10.9178	10.9933	11.0164	10.6648	10.9596	11.017	11.0048	10.8896
ALKBH8	6.61843	6.71098	6.4662	7.29596	5.65589	6.45076	6.49054	5.99982	6.30414	5.90284	6.5123	6.382	6.33679	6.36796	6.04691	5.86854	6.7522	5.82858	6.43731	6.38734	6.29307	6.14084	6.93127	6.25558	6.58601	6.8977	5.9093	6.10351	6.19284	6.46976	6.11548	6.39496	6.36509	6.54159	5.95728	6.76241	6.7502	6.64677	6.09191	6.19245	6.52105	5.58496	6.2265	6.03395	6.3363	5.93828	6.40021	6.31334	6.52388
ALLC	1.83693	2.06976	1.84475	2.02672	3.23749	1.84067	1.82712	2.07908	1.97547	2.30833	1.91099	2.88137	1.95111	1.88399	1.79835	1.9747	1.90961	1.84233	2.25951	2.08641	1.86929	1.99328	1.86425	2.94458	1.93136	1.94102	2.85249	3.34925	1.8981	2.10597	1.91915	2.5797	2.00997	1.86415	1.94163	1.87782	1.36011	2.02273	2.01636	2.04291	2.00142	1.95976	1.89661	2.80553	1.80364	2.02661	2.00226	1.85082	1.85787
ALMS1	9.87815	9.56064	10.0242	9.63301	9.3018	9.74943	9.98124	10.0359	9.70077	9.95954	9.2692	10.7003	10.3884	9.77944	10.1761	9.63256	9.96779	9.41118	9.60447	10.1262	10.6134	10.178	9.99894	9.99835	9.6927	9.75597	9.62949	9.97067	10.3056	9.75136	10.2043	9.71123	9.98954	10.1389	10.5144	9.91712	9.94775	9.28196	10.0539	10.8307	10.5681	10.2767	10.2249	9.98431	10.0736	10.2904	9.26897	9.8223	9.5557
ALOX12	3.52332	3.25059	1.80864	4.04127	4.05243	1.91262	1.93771	1.95457	2.12418	3.42704	2.2135	1.64747	1.79781	2.38692	2.33704	3.7438	2.61285	3.71392	2.05503	2.99856	1.8355	2.29468	1.38787	1.46475	1.43688	1.57433	1.54741	1.96832	2.18871	1.8804	2.13	2.63261	2.44242	1.85551	2.1588	3.39886	2.04972	1.97979	2.82565	4.21337	2.94352	2.21772	2.49512	2.34728	2.21721	3.91832	2.33333	1.95758	2.75173
ALOX12B	4.0883	4.29503	4.9333	4.10432	6.40387	4.49678	4.37632	3.72375	4.29086	4.22679	4.09045	3.79505	3.78698	4.15388	4.26726	4.50307	4.26701	4.18385	4.18063	4.24142	4.12782	3.85758	4.26575	4.60446	4.01025	4.56571	4.36471	3.94226	3.34939	3.73015	3.87037	3.98563	3.73133	4.89475	4.25723	4.28221	4.08854	4.19695	4.19324	4.20871	3.94784	4.00519	4.41469	4.16637	4.29617	3.95406	4.92071	3.90105	4.00274
ALOX12P2	4.98139	4.24355	4.70423	5.08029	4.42062	3.89783	5.49478	5.50721	5.20626	4.27794	3.38379	4.58903	5.81065	4.38526	5.26427	4.0669	3.64076	5.27805	5.24905	3.36035	5.36189	4.89286	5.11027	3.70216	4.29809	4.77274	4.90594	5.44961	4.70796	3.99988	4.81632	4.95991	4.35615	5.72569	5.61744	5.19932	3.85774	5.68285	3.78307	5.46717	5.23436	4.14418	5.55949	5.18958	4.49849	3.72887	2.09453	3.74275	5.16866
ALOX15	6.66855	1.98597	7.29216	2.78196	7.38956	6.34922	4.95524	7.54169	5.07184	5.12326	5.08277	8.07657	7.98093	4.50272	7.49092	2.19906	3.7982	5.07713	5.78	7.633	8.10659	7.62902	6.56341	2.34754	4.2798	3.4869	3.81591	6.47419	7.394	4.17339	7.50095	5.90162	6.91786	6.17792	8.25251	8.46583	3.67203	6.11844	6.94306	6.83061	8.13808	6.58557	7.98598	6.95289	6.21846	5.50351	4.06013	6.81976	2.94569
ALOX15B	11.2124	11.0754	11.1786	10.2615	9.07789	10.905	10.5917	10.7921	10.7946	11.7561	12.1656	8.69164	8.17887	11.0935	10.6791	12.3869	9.20041	10.7178	10.1762	11.3562	8.7672	8.28689	10.1824	10.6839	7.26459	10.3012	7.36473	11.2319	9.55605	9.65266	10.4098	10.093	10.2505	11.0835	10.6391	10.5943	9.97025	10.6649	8.96482	8.23945	8.71318	8.01396	10.1521	10.7107	10.5034	9.70055	10.9479	11.0431	10.1323
ALOX5	13.8212	12.6919	14.3091	14.3759	10.3085	13.986	13.033	11.2022	11.7489	12.5832	13.3195	12.113	12.0542	13.5013	12.3631	14.1135	13.5403	14.2152	11.6341	13.8736	11.8583	13.4331	12.2393	13.5693	11.8511	14.3769	11.4983	12.1977	13.4556	12.4815	13.1645	12.9068	13.2849	13.7103	13.2545	12.1407	13.9158	12.4086	12.4058	12.4173	12.4196	12.3803	13.2423	13.068	13.5591	12.0934	13.2023	13.3201	13.3039
ALOX5AP	11.3941	11.2028	11.9717	12.3949	9.9108	12.093	10.9019	10.1572	9.71268	11.6226	11.812	11.0318	10.4266	11.7626	10.0367	11.9527	11.3306	12.304	9.79407	11.8634	10.0351	11.1722	10.1602	11.3131	9.93115	12.1338	9.70258	10.3493	11.9167	10.3888	11.026	11.151	11.0045	11.9029	11.4637	10.9076	11.5603	11.5654	10.9176	8.92493	10.7339	10.6989	11.0577	11.3625	11.3401	10.2167	11.2701	11.8695	11.4804
ALOXE3	3.98648	3.34325	4.7985	3.0418	4.67278	4.76672	4.47328	4.66931	4.72808	6.29158	4.80395	4.26148	3.87662	5.05417	4.83801	5.31615	4.11481	4.37299	4.36923	4.24374	4.00793	4.18852	5.36621	4.97097	4.18119	4.23627	5.36024	4.90952	5.08585	4.17669	3.80543	3.27081	4.10029	4.663	3.89055	2.46364	3.45524	3.70947	4.39143	3.71514	4.39583	4.32276	4.15282	4.60117	3.24719	3.93648	3.71074	3.47543	3.40914
ALPI	3.72127	3.9098	5.0235	4.18788	4.72111	3.91121	5.12348	4.8486	5.15576	4.33073	5.0236	4.86169	4.68509	4.85952	4.80333	3.56198	4.27181	3.43059	4.35892	3.47677	4.67854	4.34344	5.48327	5.00963	5.595	4.21831	6.3396	5.46076	4.78346	4.50793	4.1057	4.56055	5.10277	5.10342	4.10993	3.3723	4.08067	4.2862	4.53817	5.07361	4.31788	4.34025	4.30067	5.29998	4.22233	4.90734	4.72237	4.15465	2.89795
ALPK1	9.29488	9.22114	9.52882	9.05972	7.99337	9.36196	9.51821	9.36062	9.35638	9.53166	9.15035	10.0726	9.90416	9.37033	9.2681	9.2527	9.67647	9.2824	9.55069	9.06365	9.06717	9.77924	9.35468	9.79422	9.45566	9.75712	9.42357	9.39277	8.87166	8.86742	9.26966	9.01218	9.26899	9.44745	9.41219	8.89566	9.34785	9.56369	9.01314	9.78602	9.50036	9.89565	9.27106	9.46955	9.06374	9.47525	9.81811	9.5325	9.02122
ALPK2	2.02547	4.04141	4.07538	2.58567	7.1022	1.92253	3.46679	3.97623	4.30881	2.71386	4.21455	3.57803	3.36166	2.11554	3.00785	2.0489	3.57515	2.5503	4.84791	2.31338	3.57531	3.95346	4.58276	5.78549	5.21721	4.93875	4.85431	4.69239	2.0168	5.60785	4.20307	4.2503	4.87209	2.64743	2.85059	2.00116	1.77659	5.55653	2.90953	2.41312	3.19439	3.62401	3.54103	3.2426	3.12263	2.25948	3.59479	1.99192	1.92721
ALPL	8.60517	8.96043	8.55494	7.67095	7.79688	8.57017	8.52033	8.14268	8.57607	8.53432	9.47333	8.20153	6.6678	8.06466	7.01624	8.76475	7.84883	8.99923	8.59317	8.20389	6.04465	6.30139	7.08614	8.90544	6.86773	7.90238	7.74036	8.10548	7.44788	7.07695	7.77186	8.26131	7.80978	7.71788	7.34582	7.84273	8.0814	8.55251	6.74371	7.45464	6.12362	7.70968	6.89893	8.48604	7.61106	6.56606	8.3559	7.50175	8.33062
ALPP	7.7097	6.57113	6.91072	7.21896	7.12729	9.30161	6.72379	7.65041	6.57525	7.08396	7.10294	6.50806	9.07089	7.33306	7.33222	7.72396	6.51296	7.25535	7.27931	7.09267	6.42047	6.96987	6.59832	7.32029	6.5808	6.67944	7.85595	7.23324	7.56811	6.9358	6.68888	6.52282	6.80442	7.43445	6.30181	8.16046	6.82669	7.84066	6.32005	7.7516	7.93755	7.02279	7.03099	7.17661	7.78792	7.43997	7.40601	7.20072	6.60441
ALPPL2	8.88754	7.80622	9.11495	8.84372	9.13935	9.14231	8.64139	8.92453	8.30752	8.80163	9.04636	8.87755	8.94875	9.19221	9.29452	8.18161	8.83226	8.54376	9.01254	8.49101	8.72484	8.62032	9.2333	8.97536	8.9396	8.68177	9.61889	9.4529	9.17352	8.92233	8.5467	8.53292	8.72095	8.64567	8.46788	8.77502	8.67863	8.38793	8.48043	9.76366	9.30521	8.96647	8.85129	9.14826	8.9001	8.7816	9.03655	8.69046	8.37371
ALS2	7.13005	6.36911	7.06515	6.89545	4.92718	7.15041	6.69114	6.74273	6.89707	7.1129	7.48617	6.86138	6.9302	7.25586	6.84064	7.31135	7.19594	7.23946	6.7496	6.88806	6.81372	6.93518	7.15483	7.2617	6.88852	6.83815	6.53707	7.10839	6.97155	6.84212	7.16778	6.73815	7.17936	7.31458	7.36051	6.91768	7.48487	6.71633	6.98585	7.07723	6.82009	7.27351	6.43997	6.84023	7.22664	6.31175	6.76966	6.94946	7.23485
ALS2CL	9.24301	8.35906	9.0355	9.85688	9.04538	9.4883	9.32291	8.08436	8.56272	9.13806	8.40363	8.04777	9.52307	8.84879	8.80117	8.98728	8.88467	8.87776	8.75876	8.63666	8.65451	8.16641	8.51391	8.68123	8.49058	8.83409	8.51692	8.85412	9.56366	8.01675	9.21059	8.82771	8.65735	8.1836	8.90053	9.14649	9.46117	8.80084	8.79838	8.80863	9.06632	8.88674	8.96232	8.71696	9.29165	8.4613	8.78348	8.49402	9.24475
ALS2CR11	4.47327	5.34886	3.06648	3.72164	7.19252	4.11509	3.55495	1.32823	4.93883	4.27389	4.22089	3.31246	3.65593	4.05466	3.74017	4.799	5.25046	4.63408	3.70479	4.80415	3.65001	3.86249	4.63821	4.71923	5.08895	4.513	4.2155	4.31692	4.21718	5.03318	5.19391	4.64186	4.69342	4.33197	4.67859	5.28826	5.5945	5.1609	4.81715	3.29273	4.78005	4.03167	4.60852	3.99176	3.32459	4.67163	2.16108	4.85909	5.35891
ALS2CR12	4.09739	1.97457	5.23642	2.86597	5.60012	4.60529	4.91501	6.89327	1.91848	4.57428	4.24809	6.5637	5.96937	2.35542	5.34611	2.42771	2.44602	3.75355	5.26011	5.37427	6.6495	6.22439	4.90902	1.58301	3.7134	3.60935	3.03706	4.61628	6.17181	2.99593	4.72013	4.41102	5.83508	4.28298	7.01415	5.09154	2.56246	2.94361	4.9992	7.0819	6.56814	5.67895	5.72093	5.73607	4.00694	4.22107	2.63116	5.37525	1.75505
ALX3	3.1497	3.32856	3.79101	3.40706	5.12545	3.11372	3.14025	2.37053	3.93134	3.18649	3.1493	3.17176	3.6075	3.31199	3.34287	3.03007	2.59412	3.54825	3.72655	2.9996	3.22229	2.78498	3.38319	4.13046	5.28084	3.41128	4.30688	3.79925	2.52117	3.5224	2.48976	3.57762	3.21748	3.95072	3.78096	5.39547	2.89091	2.98707	2.98328	2.99909	3.11237	3.70785	3.6103	3.97761	2.53367	2.60401	2.17769	1.817	3.12323
AMBN	3.86162	3.16037	4.04815	4.35732	4.63848	3.42117	4.04909	3.97984	3.60309	3.63925	3.89755	3.55989	3.37084	3.81863	4.02933	3.94747	3.5704	3.44801	3.69021	2.38426	3.82943	3.95339	4.26102	3.20867	4.09949	4.29939	4.34282	3.86539	3.86728	3.82178	4.06486	4.30257	3.17505	4.6108	3.51134	3.6095	3.57263	4.49892	4.81875	4.57625	3.79964	3.44627	3.43942	3.82661	3.2979	4.0183	4.32706	3.61202	3.87275
AMBP	4.5984	5.12086	3.47277	4.38793	4.42083	3.94836	3.40401	3.12876	4.4791	4.12608	4.71065	3.40677	3.73942	3.65694	3.22955	3.78331	4.23677	3.76055	5.56176	3.30585	2.89582	2.96416	4.30436	4.14603	1.59061	4.10795	2.69666	4.60065	4.69326	2.21636	4.55267	2.83674	4.19679	4.55185	3.06348	4.47009	4.06495	3.57978	4.21603	3.19058	4.14593	3.31533	3.75117	4.17438	3.81084	3.00649	2.15292	4.04218	4.13028
AMBRA1	10.2559	10.235	10.1715	10.1491	9.32717	10.261	10.0812	9.83588	10.0478	9.97992	10.0011	9.77699	10.1978	10.1858	9.7815	10.0878	9.89527	10.1624	10.2446	9.88926	9.90802	9.68067	9.99014	9.95441	10.1863	10.0089	9.75025	10.0226	9.77218	9.99166	10.4622	10.276	10.011	10.2379	9.6843	10.0026	10.3554	10.2678	9.93855	9.64121	9.88527	9.89812	9.81356	10.0403	9.96598	10.0687	10.08	10.2093	10.266
AMD1	12.2404	11.9514	12.08	11.8505	11.2049	11.868	11.9561	13.545	12.2418	12.6131	12.1382	12.6745	11.9453	12.3366	12.1645	12.4575	11.8789	11.9315	12.9884	12.3016	12.1001	12.4124	11.8792	12.6227	11.9472	12.3326	12.0926	11.9234	11.9135	11.8891	11.869	12.1024	12.2311	11.9393	12.2194	12.1961	11.7074	12.5666	12.1841	12.3744	12.358	12.5529	12.0902	12.1199	12.2324	11.8534	12.2363	12.0357	12.0563
AMDHD1	5.23064	5.90748	5.86688	6.19743	5.47629	6.06124	4.37263	5.59539	6.16442	6.00096	5.39111	5.06331	5.34276	6.47856	5.62664	6.42235	5.22659	6.31481	6.33353	6.20806	5.96554	5.79523	6.40007	4.93221	4.57669	5.42416	4.83721	6.3858	5.70446	5.19655	5.49792	6.40241	5.0357	4.55619	4.66653	6.34934	5.66867	6.22033	5.66782	4.37087	4.22246	5.72291	5.65459	6.41105	5.78444	6.3239	6.87553	5.76892	5.66948
AMELX	1.72831	2.10445	1.73798	1.86088	2.99998	2.24988	1.83591	1.84511	1.8691	1.9788	2.12259	1.75474	1.99376	2.83869	1.77862	1.89704	2.05023	1.74977	1.89791	1.78137	1.79776	1.98259	1.78741	1.93903	1.88899	1.89999	2.07516	1.71727	2.34387	1.78793	2.48277	1.7188	1.81115	2.1296	1.83251	1.85059	1.92515	1.95165	1.94886	1.96048	1.98507	1.7309	1.84456	2.07384	1.82013	1.94655	2.20058	1.83909	2.31944
AMELY	1.78377	2.38255	1.7667	2.00094	2.22459	1.91318	1.95859	2.1679	5.00026	2.02563	2.02882	1.83028	2.02797	2.89204	1.87981	1.95933	1.8729	1.79825	2.04328	1.80051	1.84713	2.19249	1.8351	2.18196	2.01821	2.03607	1.83239	1.7686	2.05437	1.85193	5.6115	1.82542	1.88646	1.83059	1.86523	1.98045	1.70419	1.61198	2.43445	2.3301	2.21899	1.75388	1.92289	1.9551	1.95183	2.08975	2.14794	1.98224	1.94232
AMFR	9.47611	10.0765	7.99205	9.07098	8.48407	9.1436	8.94654	10.239	9.63546	9.45521	9.89769	8.41453	9.00856	9.36686	9.95343	8.91082	9.35079	9.48229	10.1004	9.55877	8.10922	10.1639	8.71656	9.79512	9.63609	10.4673	9.58551	8.57724	8.61159	8.61189	8.62749	9.85284	9.56304	9.78709	8.83967	8.51758	9.21659	9.64625	9.78985	9.5759	9.9828	9.52553	10.1816	9.6022	10.1279	9.31082	9.19188	10.6188	10.1531
AMHR2	3.68162	4.96383	4.83054	3.93596	4.06052	3.42892	4.6839	2.7936	4.44141	3.96857	3.73426	4.10953	4.23582	4.50824	4.90974	2.64806	2.9792	4.05885	2.61365	4.17352	4.30119	4.65095	3.43527	3.05821	3.94889	4.806	4.2433	3.77546	4.08898	4.37896	4.55004	4.55991	4.5229	4.61857	4.05746	4.39023	2.58441	3.03725	4.98133	3.16622	4.902	4.03888	4.39981	4.43382	4.31362	4.82006	2.72308	4.15512	4.11242
AMICA1	13.1873	13.0297	13.4451	14.0046	11.8487	13.2266	12.9316	11.3164	12.5444	12.5221	12.9855	11.8322	11.7156	13.0004	12.1322	13.5786	13.5451	13.7285	12.0993	13.4515	11.8862	12.8915	12.4776	12.964	11.284	13.2885	12.0101	12.4806	12.804	12.4923	12.8194	13.0034	13.1609	13.0063	12.5559	12.2651	13.5217	13.4185	12.3081	11.2101	12.178	12.9397	12.9145	12.624	13.2738	12.5342	13.4428	12.84	12.8465
AMIGO2	10.2545	9.59088	9.97894	10.48	7.67621	10.4861	9.49492	8.98663	9.50277	9.89811	9.54286	8.92206	8.67577	9.8305	9.33608	9.63354	10.3105	10.327	8.30079	10.0446	9.43914	9.15662	9.70071	10.4932	9.36456	10.0709	9.21282	9.09741	9.78337	9.16569	9.35294	9.53281	9.69581	9.67813	10.1016	10.2882	10.5694	10.006	9.77877	9.63296	9.64268	9.19584	9.91414	9.19549	10.07	9.00442	9.33689	9.93124	10.1389
AMMECR1	7.44129	7.17236	6.70017	6.92507	5.73701	6.95571	6.72952	7.2563	7.22565	7.44734	7.10119	6.54304	6.66592	7.53444	7.06248	7.80797	7.34411	7.0812	6.99284	7.04094	6.9556	6.9271	6.91973	7.84646	6.77271	6.73104	6.74664	6.92852	7.12219	7.08737	6.88693	7.0278	6.91701	7.34983	7.13428	7.3753	7.05797	7.67574	6.33491	6.86352	7.06532	7.24353	6.68638	6.95499	7.18105	6.8888	7.09629	6.74866	7.49962
AMMECR1L	10.7412	10.8859	10.4832	10.8136	9.6022	10.4673	10.5162	11.3842	10.551	10.9098	10.7504	10.9406	10.6616	10.7727	10.502	10.8605	11.0353	10.5974	10.8429	10.3966	10.4251	10.361	10.2048	11.2559	10.6146	10.3448	10.8013	10.3664	10.5397	10.9868	10.3444	10.4841	10.8267	10.1975	10.7447	10.7837	10.9523	11.0525	10.3787	10.3099	10.5723	10.3801	10.5862	10.4995	11.0487	10.8787	10.3157	10.2523	10.491
AMN	7.92182	7.03142	9.06485	8.49949	9.8491	9.39014	8.74955	8.47708	7.45663	8.81174	8.88068	8.28479	8.29401	8.31598	8.45721	7.91645	8.33274	8.58067	8.86387	7.679	8.03309	8.06057	9.45677	9.46995	8.60781	8.23368	9.96758	9.70016	8.35156	8.6584	7.56787	8.49015	8.42986	7.75798	8.33992	8.18639	8.43165	7.99635	8.31875	8.66856	8.00708	8.97688	8.3026	9.05463	8.35266	7.82738	8.62963	7.53976	7.42632
AMN1	6.11732	6.11568	5.78875	6.20581	4.18167	5.9931	5.339	5.71907	6.1714	6.08305	5.71403	5.94444	5.69339	6.36224	6.29109	6.49249	6.14	6.07947	5.31897	6.16488	6.09108	5.94132	5.97029	5.9118	5.79811	5.12524	5.54765	5.26269	6.60186	6.52985	5.93731	5.97504	5.33322	5.80214	6.64413	5.73972	6.47561	6.23539	5.90367	6.35239	6.07004	5.788	5.96086	5.81848	6.10161	6.29613	5.72792	6.18787	6.48119
AMOT	7.0546	6.69757	6.50483	6.98213	7.09624	6.55195	7.24325	6.35808	6.60794	6.79438	6.53282	7.12788	7.29147	7.3903	7.42726	6.73865	7.18727	6.69438	6.17915	7.01579	7.12356	7.0113	6.79756	7.23651	6.73659	5.83303	6.96978	6.97645	7.59742	6.51379	7.28609	6.63424	6.73885	6.94676	7.45306	7.14841	6.97079	6.18353	6.94554	7.79687	7.21496	7.30946	7.17684	7.3355	7.21665	7.46571	6.4323	6.78916	7.0697
AMOTL1	6.6781	6.31311	6.16216	7.09764	4.66198	6.88286	6.18023	6.50794	5.67362	6.96304	6.91817	6.62017	6.02418	5.90193	5.7728	5.76406	7.18511	6.58905	6.37765	6.18191	5.81015	5.2752	6.37708	7.23864	6.16648	6.28	5.96439	5.74098	6.33441	6.26041	6.85722	6.14037	6.41494	5.99726	6.24001	7.03436	7.65119	6.7954	6.65365	4.90792	6.00418	5.11114	5.75132	5.78119	6.51482	5.94598	5.46361	6.07942	7.14752
AMOTL2	12.8993	12.6302	12.0792	12.3327	11.1678	12.6418	12.2287	11.205	12.7751	12.0933	12.352	11.6897	12.0673	12.821	12.4712	12.6995	12.7361	13.1122	11.8526	12.4651	12.5458	11.9821	11.507	12.2345	12.0128	11.5296	12.2617	11.7297	12.9852	12.3142	13.0627	12.0509	12.5647	12.1785	12.4661	12.9266	13.3195	12.6006	12.4464	13.3848	13.069	12.096	12.5589	12.3736	12.9388	12.5926	12.0666	11.5614	12.7517
AMPD1	6.72443	7.1648	9.27244	6.0051	5.46139	8.16462	8.77703	7.55578	9.15062	7.72598	7.27803	7.49734	7.26595	7.83924	8.943	4.19869	10.0754	5.58821	8.22326	7.08413	8.06707	8.58582	10.2266	7.67346	9.70316	8.3681	9.90978	9.13391	7.64408	9.38238	7.79702	8.58101	9.23428	8.67907	8.7008	6.72523	6.47538	6.42599	8.8054	7.02129	8.00695	8.64581	9.78468	9.10309	7.0082	9.3192	5.01756	8.1026	6.12538
AMPD2	8.92469	10.0637	9.56	9.57528	9.34389	9.41623	9.57246	9.76638	9.6327	9.49906	9.79606	9.0048	9.13789	9.71653	9.39917	9.06237	9.42836	9.38403	10.1189	9.34018	9.1092	9.80902	9.49447	9.18053	9.96406	9.70909	9.83537	9.7373	9.00806	9.75911	9.24664	9.78938	9.52899	9.25554	9.42676	9.0189	9.07337	8.87357	10.0396	9.70826	9.27422	9.89647	9.22913	9.30614	9.30302	9.06326	9.93819	9.3275	9.23922
AMPD3	8.37555	8.51948	9.58408	8.05365	7.14457	8.74234	9.44903	8.99489	8.97287	8.31868	8.82071	10.5275	10.3077	8.16858	9.48536	8.36423	8.84479	8.55624	8.80193	9.29974	10.0548	10.0331	8.99823	8.81454	8.89182	9.17699	9.18406	9.13822	9.22252	9.40956	8.66095	9.11396	9.12436	8.61623	9.89511	8.65066	8.13533	8.57803	10.7802	8.58619	9.48398	9.81418	9.75904	9.46434	8.80987	9.94833	9.87007	8.98986	8.49258
AMPH	4.3415	5.94036	4.21514	4.70072	4.50822	4.22382	4.45152	4.86884	5.72883	4.56377	4.75161	4.80149	4.91418	5.92694	5.72731	4.4699	4.64373	4.68199	4.73727	4.85373	5.15774	4.85913	5.37301	5.06294	5.97651	4.95426	5.11976	4.71678	5.03312	5.54213	7.50606	5.8604	5.30747	5.96925	5.12895	4.56289	4.5984	4.45018	5.08709	4.01921	4.72355	4.69257	4.94489	4.89338	5.12804	4.68931	3.62313	5.64169	5.0514
AMT	10.2388	10.2227	9.76436	10.5751	8.90287	9.52544	10.5235	9.65067	10.1626	9.91894	9.7612	10.1239	10.4901	9.70363	10.4722	10.1273	9.88821	9.8532	10.2619	10.4373	10.7325	10.1053	10.5503	9.56862	10.246	10.4375	10.5677	10.5598	10.6904	10.42	10.9078	10.4698	10.5666	10.5337	10.3378	9.95056	10.5621	10.3432	10.1089	10.6551	10.0336	10.4036	10.7406	10.2885	10.3565	10.6398	9.87489	10.6171	9.99926
AMZ2	11.4058	11.2401	11.719	11.8244	10.2102	11.522	11.2638	11.0065	11.4991	11.3074	11.5126	11.4736	11.4934	11.1121	11.8226	11.5726	11.3284	11.2262	10.998	11.7827	11.6374	11.5611	11.7931	11.3298	11.7125	11.2856	11.4365	11.5387	11.5275	12.0205	11.5711	11.396	11.6711	11.5553	11.3574	11.1271	11.4695	11.1892	11.5024	11.9709	11.7525	11.7561	11.6619	11.782	11.4952	11.7182	11.3708	11.0561	11.3449
ANAPC10	8.56435	8.40592	8.58465	8.49196	7.56787	8.6436	8.44292	8.30184	8.4676	8.33963	8.48539	8.86401	8.56881	9.20082	8.63703	8.61397	8.54464	9.08575	8.16183	8.41963	8.32285	8.65956	8.2962	9.05126	8.1251	8.47384	8.55329	8.48291	8.88061	8.25151	8.23749	8.11064	8.47385	8.74416	8.66462	8.48075	8.7045	8.17446	8.87771	8.45696	8.37183	8.43557	8.35393	8.67788	8.74114	8.73856	8.45758	8.28481	8.40563
ANAPC11	14.112	14.3581	14.2065	13.9049	14.0975	14.4613	14.1458	13.2855	14.1493	14.0728	14.4865	13.8829	14.3085	14.2285	13.7951	14.3302	14.1733	14.5655	14.2336	14.0732	13.9042	14.1317	14.1443	14.5363	14.1012	14.0766	13.9844	14.1361	13.6786	13.4512	13.7607	13.9165	14.1377	14.3407	14.2765	14.3353	14.3722	13.7652	13.7641	14.1772	13.9686	14.0337	14.0725	14.4006	14.1302	13.8856	14.5673	14.029	14.0601
ANAPC13	10.0457	10.3306	10.4437	10.0589	9.06665	10.12	9.48236	9.718	10.1965	9.76299	9.82349	9.97187	10.142	10.1219	9.67782	10.3065	10.257	10.2408	10.3941	10.034	10.0571	10.3173	10.0044	10.0647	10.1737	9.99334	10.271	9.84624	10.2592	10.1997	9.95025	9.59531	10.1865	10.1501	10.1999	10.287	10.0604	9.76075	10.1399	9.60404	10.4194	10.1696	9.88399	10.2037	10.2003	10.0251	9.89185	9.8519	9.77969
ANAPC2	5.87458	6.3709	6.22053	6.64349	5.82867	5.89936	5.68136	6.28309	6.67792	6.44211	6.61921	5.78193	6.09129	5.75888	6.27348	6.80963	6.46893	6.3688	7.88878	6.42502	6.43146	6.30784	6.19486	5.71944	6.2524	6.40952	6.16743	6.39133	6.05974	6.37103	6.68917	6.49738	6.2444	6.46048	6.48311	6.75571	6.30708	6.22528	6.22369	6.23031	6.11539	6.38798	6.24991	6.16949	6.14068	6.06248	6.07387	5.8379	6.52866
ANAPC4	11.8299	11.3408	11.9429	11.5213	10.2371	11.5014	11.6218	11.8149	11.4123	11.2197	10.7551	12.3467	12.3314	11.4063	11.8256	11.4955	11.7472	11.2861	11.4301	11.8716	12.4375	12.1733	11.4859	11.5763	11.5937	11.8414	11.2647	11.4258	11.6874	11.6436	11.8591	11.4981	12.0029	11.6728	12.0314	11.1268	11.6373	11.7384	11.4222	11.8598	12.4531	12.3197	12.0935	11.7464	11.5079	12.0629	11.1985	11.708	11.3136
ANAPC5	12.6557	12.7599	12.7638	12.5144	12.8121	12.7833	12.8046	12.868	12.763	12.838	12.6145	12.8884	12.7897	12.4269	12.6945	12.7576	12.8912	12.6555	12.7181	12.7872	12.9844	12.6428	12.9333	12.7323	12.9179	12.7745	12.8062	12.7876	12.5686	12.9586	12.9394	12.7857	13.007	12.7681	12.833	12.6141	12.742	12.784	12.8426	12.986	12.9264	12.9527	12.9048	12.6468	12.6452	12.6788	12.4975	12.6486	12.6292
ANAPC7	7.65453	7.72159	7.92793	8.03958	8.66207	7.57076	7.86713	7.93481	7.17834	7.93937	7.79467	7.91811	7.92854	7.63279	8.14914	7.99487	7.85506	7.74679	7.95778	7.84214	7.84096	7.98774	7.65645	7.33459	8.12819	7.72335	8.3448	7.9482	7.99782	8.08957	7.94906	7.85325	7.8395	7.69788	7.93088	7.49105	7.78012	7.36941	8.19481	8.0345	7.62181	8.19583	8.14528	7.77489	8.26717	7.90386	7.42767	7.94992	7.79983
ANGEL1	7.60893	7.69013	7.7585	8.09468	7.95799	7.67559	7.4083	7.39514	7.8724	7.38211	7.71211	7.28261	7.57995	7.47496	7.61254	7.75871	7.81252	7.924	8.03131	7.32892	7.46339	7.67689	7.77898	7.73336	7.9239	8.20225	7.54577	7.68557	7.5446	7.71614	7.53027	7.46658	7.86178	7.33113	7.64279	7.47348	7.97818	7.63188	7.8916	6.91463	7.34402	7.64472	7.67182	7.62337	7.51965	7.73334	7.94756	7.73684	7.61498
ANGEL2	6.10657	6.21954	6.49973	5.31155	3.77502	6.51704	5.96402	6.14593	6.50444	5.87879	5.63498	6.29292	6.13379	6.76303	5.84088	4.90111	6.74536	5.85005	6.11116	6.1748	6.23163	6.16602	6.08249	5.8691	6.06708	6.56529	5.05068	6.19194	6.02856	6.68104	6.30446	5.50044	6.20257	6.46526	6.41698	5.86624	6.60556	6.15565	5.97561	5.96055	5.54343	5.75853	5.94864	6.24114	5.68007	7.11698	6.21927	6.90926	5.94489
ANGPT1	11.0026	10.6137	10.1687	11.3956	8.78818	10.001	9.62244	8.93563	10.3076	10.067	10.4465	9.61138	9.36689	10.4012	10.4646	11.189	11.4144	10.538	8.82502	10.4236	10.1282	9.50598	10.43	10.2939	9.92864	9.85288	9.85921	10.4385	11.025	10.9736	10.845	11.6441	9.83605	10.7682	10.3636	10.9032	11.6931	10.4279	10.6289	8.77499	10.4789	9.75193	10.674	9.91059	11.2374	10.0555	9.62094	10.8548	11.5402
ANGPT2	8.33806	9.88661	8.04658	8.73434	6.45519	7.86512	8.86739	10.6364	8.50898	8.49915	8.57069	9.66477	8.10962	9.57266	8.48073	7.47426	9.38586	7.50668	9.36623	8.89077	8.80181	8.33644	10.4753	10.2453	9.37838	8.59776	10.7157	9.61605	8.71633	10.0702	8.96953	8.93136	9.19132	8.98755	8.00973	6.73092	8.60586	10.1727	9.30696	8.7782	9.79657	7.68296	10.0178	8.88551	9.09532	8.49158	9.18978	10.2017	8.34072
ANGPT4	3.30466	2.0292	3.59136	3.49479	3.87812	3.55132	3.59435	2.02792	3.38934	3.53262	4.34371	3.98915	3.13106	4.859	3.23796	3.64163	2.78884	3.77385	2.17486	3.57646	3.08294	2.8513	3.32988	4.34365	5.12014	3.91489	5.7907	3.35103	4.89093	3.96995	3.28041	3.14717	2.67182	3.75027	3.49218	3.41481	3.13176	3.5203	3.51385	3.54072	3.48514	3.1511	3.67931	2.72392	2.94891	2.84703	4.03439	2.73174	1.93733
ANGPTL1	5.66618	5.48365	2.60929	4.44633	2.77355	4.53417	4.61968	5.51695	5.50279	4.81516	4.58448	5.49877	4.52529	5.88362	4.69303	6.55491	5.16201	3.81908	4.8928	5.01764	4.81595	3.84759	4.62525	7.07379	5.1616	4.88466	4.02882	4.42657	6.74919	4.1026	5.77835	4.74007	5.80022	5.24013	4.52349	4.1546	4.97592	4.04891	5.77415	4.05762	4.61333	3.46431	3.49399	4.38608	4.42773	6.87941	3.57062	5.00336	5.41664
ANGPTL3	1.82229	2.19634	2.32015	2.16599	2.37722	1.91933	1.94983	1.9915	2.07662	1.97538	1.98301	1.8408	1.98893	2.0001	1.87878	1.92927	1.77625	1.85227	1.9982	1.83245	1.8568	2.08915	1.85875	2.03152	1.98588	1.96655	1.80025	1.84404	2.10109	1.85409	1.98937	1.82404	1.88236	1.87889	2.1651	3.48888	1.92564	1.9522	1.94619	1.97124	2.11301	1.80161	1.91602	1.92246	1.94782	2.06601	2.05774	2.01093	1.98781
ANGPTL6	6.61616	6.75205	5.52213	6.5216	5.77037	6.44814	6.10814	5.17218	6.63922	6.62781	6.36169	4.52939	5.21957	7.13739	6.23793	6.76854	5.81258	5.80037	6.50445	6.40841	6.05485	6.34676	6.23798	6.28612	6.23938	7.17646	6.30873	6.01741	5.82226	7.47681	6.26551	6.94665	6.48278	6.99324	6.20629	5.84811	6.01593	7.08837	6.6986	5.60378	6.21427	6.30533	5.80217	6.87944	6.39981	6.63598	7.29371	5.8641	7.20008
ANGPTL7	6.78557	4.70648	4.51882	7.13602	6.13348	4.35115	3.44761	3.91764	4.69182	5.54415	4.8591	5.10518	2.26294	7.97339	5.40379	5.59408	6.06216	5.85243	2.70236	5.4649	4.34635	1.86577	5.13867	5.17746	4.73344	1.57397	5.61995	4.52899	5.70201	5.63851	6.15249	5.34938	4.51477	5.12177	3.56818	4.65124	6.28478	5.29702	4.00933	5.96729	5.40547	2.05891	4.56787	6.80482	5.8917	5.3241	5.66952	5.98541	6.09117
ANK1	5.16899	6.32421	5.84653	6.75507	5.84612	6.16574	6.22278	5.39597	6.90853	5.70328	6.64228	5.1584	5.83899	6.42375	5.98064	4.6889	5.42941	5.68763	6.33914	5.43787	5.31538	5.38307	6.4577	5.95807	6.32632	6.14503	6.51729	6.33874	4.93451	6.8501	5.08926	6.00663	5.67412	5.36949	6.05851	5.57959	5.89828	5.15613	6.18708	6.90354	5.41063	6.0371	6.43758	5.71648	5.48317	5.91011	6.23934	5.37971	6.64684
ANK2	6.2218	6.85846	5.8138	5.53977	4.24182	5.16519	5.88109	6.92202	6.51642	6.67168	6.87641	5.69406	5.23918	6.569	6.39695	5.90764	7.33029	5.21053	6.37146	5.84687	5.94663	5.75831	6.38558	6.98831	6.85622	6.10251	7.27964	6.3867	5.97992	6.57333	6.39367	6.83383	6.15092	6.2052	4.46191	5.54147	5.95749	5.82044	6.55094	5.56707	6.13847	5.33942	5.39437	5.77923	5.96902	5.83469	6.38026	5.94523	6.49395
ANK3	6.58059	4.74453	5.77669	2.92937	3.39047	5.24472	5.61876	5.62251	5.83124	5.32193	4.96402	5.41741	5.83862	4.03133	5.54757	6.07072	5.20956	4.6691	5.60201	5.50493	6.29343	5.80034	5.51576	5.06264	4.85246	4.00323	4.00014	4.87673	5.64058	4.8537	5.57633	5.22532	5.23755	4.6939	6.1105	6.21664	5.76804	5.229	5.52262	6.69418	6.46131	5.26109	5.82716	4.88897	5.41851	4.97548	4.22254	5.82187	6.02697
ANKAR	7.96922	7.52808	7.67808	7.59788	9.19295	7.38953	7.57289	7.14089	8.16108	7.61972	6.6709	7.09894	7.93246	7.66648	8.08407	7.90479	7.91624	7.46181	7.47471	7.8042	8.08088	7.59259	7.80494	7.66015	7.85627	8.55636	7.74821	7.98716	8.37377	7.97607	8.30784	7.82727	7.79233	8.49439	7.79909	7.60553	7.49371	7.55258	7.55039	7.55953	7.79111	7.65477	8.17304	8.017	7.58577	8.27163	7.36314	7.55976	7.66929
ANKDD1A	5.05705	6.30348	4.69491	5.73078	4.80569	5.19332	5.44966	6.16129	6.54478	6.37256	4.91566	5.8562	5.40143	6.14589	5.65135	4.84714	6.07941	5.28318	5.32363	5.43987	5.75123	6.01224	6.58245	6.40109	6.33598	5.94327	5.55469	5.94879	5.33699	6.98823	6.10265	6.23562	5.91279	5.73313	5.66532	5.22401	5.4198	6.43449	5.39083	5.09215	5.65987	5.28488	5.41942	5.43834	5.5659	5.70998	6.00609	5.89944	5.81338
ANKFN1	5.50291	3.49147	6.10932	3.95821	5.37213	5.16528	6.24318	7.06176	5.03932	4.77881	4.66122	7.80945	7.83545	4.43468	6.12782	3.65849	4.40599	5.02967	5.57297	6.88775	7.91618	7.09351	5.02744	3.42024	5.07107	5.01028	4.27033	5.77861	6.29197	3.79686	6.49012	4.78209	6.02914	6.67976	7.49474	6.79503	4.58236	3.90562	3.9023	7.37395	7.48834	6.97548	7.15579	5.91357	5.8235	6.02334	5.01902	5.76971	3.61611
ANKFY1	9.86223	9.51869	9.51714	9.44815	7.86215	9.65954	9.78534	9.62162	9.71848	9.625	9.45363	9.85936	10.2474	10.2273	9.6638	9.43444	10.054	9.52744	10.0342	9.7832	9.60626	9.19947	9.2801	9.74672	9.29888	10.0541	9.356	9.46079	9.9946	9.89241	9.30681	8.83026	9.22518	9.05612	9.17659	9.8889	10.0784	9.86722	9.31911	9.40292	9.58375	9.00312	9.55623	9.2631	9.80605	9.97983	9.743	9.61476	9.22731
ANKH	9.05352	9.86755	9.2414	8.80229	7.61589	8.51981	8.99471	9.79461	9.6612	9.41394	9.26279	9.50514	9.24126	10.1772	9.76133	8.19342	9.70966	8.16233	8.89375	9.24571	9.27562	9.29204	9.53479	10.3842	9.75239	8.93598	9.08463	9.59534	9.95543	9.84621	9.63337	9.16029	9.12309	9.57576	9.05513	8.90731	9.20505	8.89977	8.29356	8.29967	8.75359	9.18933	8.95226	9.05065	9.42752	9.87642	7.98855	8.87417	9.10435
ANKHD1	9.0684	9.04527	9.00941	8.80086	7.95954	9.1712	8.86736	9.51036	9.01758	9.36162	9.2387	9.28496	9.09037	8.84788	8.62273	9.23367	9.3686	9.09013	9.68258	8.97032	8.99495	9.30464	9.08759	8.83969	8.91417	9.0448	8.6485	9.01419	8.78351	8.60715	8.94115	9.20728	8.9536	8.85002	8.85391	9.14719	9.04119	9.47096	9.3462	8.80479	9.27614	9.06549	8.89734	8.78791	8.85441	8.54806	9.35624	9.03141	9.18628
ANKMY2	8.16496	8.05354	8.61359	7.718	6.03768	8.01113	8.09017	7.50922	7.84382	7.83826	7.6685	8.05927	8.33174	7.93447	8.58969	7.88053	8.28102	7.9228	7.3134	8.23112	8.27591	8.72731	8.18459	7.95762	7.86488	8.10419	7.5519	7.8597	8.24621	8.00686	7.94113	8.42017	8.52345	7.92167	8.40173	7.80575	8.60741	7.49143	8.61452	8.5369	8.39953	8.06842	8.51491	8.61957	7.86875	8.42478	8.00191	8.2894	8.33379
ANKRA2	8.66727	8.76849	8.94589	8.28011	7.26758	8.36188	8.81256	8.57271	9.24379	7.84844	8.33551	8.94442	9.43812	9.06434	9.20593	8.68114	8.95055	8.26102	8.52497	8.50768	9.11939	8.84581	9.05346	8.62593	8.67564	9.00965	8.88696	8.90921	9.10884	8.64062	9.2407	8.87768	8.83495	8.93145	8.81285	7.69904	9.11261	8.25071	8.42655	8.6153	8.88454	9.04358	9.13394	8.86678	8.47974	9.58074	8.39282	9.08865	8.41654
ANKRD1	2.84427	6.11321	3.86418	6.83193	4.03509	4.50429	1.85661	3.27781	3.23473	8.23544	4.85138	1.97867	1.46759	4.30599	3.55098	5.55444	3.47528	7.1909	2.24446	4.59509	1.33466	1.75598	2.0428	4.78517	1.48139	1.59644	2.85353	2.67908	5.76045	1.76981	5.47735	2.53368	4.53724	2.96746	3.25796	4.92942	6.74018	4.99125	1.82212	2.2168	1.61702	3.10792	3.47552	3.4078	4.68803	3.14845	3.45447	1.86199	5.50819
ANKRD10	9.74029	10.0817	9.82699	9.72123	8.79459	9.35891	10.1671	10.3026	9.95281	9.81475	9.41964	10.0711	9.71607	10.0298	10.2531	9.57456	10.2902	9.25594	9.71779	9.81817	10.1215	9.69472	9.79014	9.99039	10.0822	10.5016	10.1944	9.88394	9.89036	10.2291	9.86194	10.1823	9.9857	9.84922	9.72077	8.93781	10.0901	9.99205	9.66847	9.55133	9.58668	10.2	9.8494	9.57055	9.97172	10.2926	9.42365	10.1312	9.81164
ANKRD11	10.2303	9.92806	10.7064	10.6441	10.5523	10.7093	10.2331	10.6142	8.8248	10.5552	10.3418	10.8414	10.4072	10.4303	9.09883	8.23498	10.3164	9.73619	9.31638	10.0607	10.1558	9.35296	10.3528	10.4455	10.2279	10.8227	9.77936	9.7068	9.33997	10.4264	10.3226	9.70973	9.53247	9.90139	9.83813	10.0363	10.1891	10.7789	9.86445	9.48938	9.93145	9.48915	9.96286	9.60137	10.2067	11.1069	9.90964	10.6322	10.2945
ANKRD12	10.0136	9.82225	10.0385	9.88944	8.22784	10.0258	9.68517	10.3005	9.5888	10.1083	9.16676	10.285	9.95826	10.236	9.53727	9.13864	10.2997	9.17683	9.8914	10.0248	9.79661	9.98752	9.69568	10.3473	9.33723	10.3284	9.92518	10.0122	9.95377	10.3093	9.84794	9.828	10.1004	9.81578	9.77128	8.62738	9.9623	10.1759	10.1043	9.61413	9.96424	9.79621	10.098	9.96922	9.98374	10.4065	9.94489	10.4684	10.4253
ANKRD13A	8.05838	7.9049	7.95734	8.03863	6.9411	8.19465	7.57645	7.7691	7.67508	7.98882	8.12189	7.44286	7.81611	7.28538	6.96727	7.10448	7.95617	7.49383	7.9073	7.83718	7.67435	7.80892	7.92458	7.89776	7.74494	7.99462	7.32024	7.48703	7.23513	7.89868	7.8356	8.03188	7.81396	8.10563	7.93864	8.54019	8.00449	7.79921	7.59455	7.53326	7.87665	7.67468	7.75582	7.56509	7.53885	7.59389	8.27555	7.7644	7.89035
ANKRD13B	5.05533	6.35999	5.01861	4.76616	7.17182	4.56029	5.08111	5.65847	5.82174	4.4178	5.66955	5.17634	4.6585	5.67551	5.15007	4.82773	4.996	5.74997	4.5721	5.55626	4.83477	4.88823	4.93222	6.07638	6.03682	5.09309	5.9687	5.85674	4.91465	5.62091	5.50997	4.8342	5.23176	5.198	4.53433	5.50884	4.36383	5.65915	4.70502	5.54867	5.23945	4.44687	5.08038	5.09117	4.75856	5.31714	5.77105	5.7457	5.42192
ANKRD17	5.85246	5.32515	5.519	5.78859	5.0772	5.61099	5.27806	5.50812	4.76251	6.00462	4.96673	5.30943	5.28078	5.02012	5.24575	5.18174	5.5693	4.86508	5.61839	5.30274	5.41962	5.66086	5.35869	4.29909	5.34142	4.53335	4.95287	4.35689	4.48263	4.93059	5.49299	5.72551	4.76719	5.15283	5.68734	5.56933	5.30849	5.41138	5.2724	4.73465	5.78738	4.77227	4.7223	4.43562	5.15861	3.9579	5.21413	5.33298	6.19762
ANKRD24	4.41225	5.27978	4.76975	4.73269	6.82061	5.11962	4.73655	4.86105	4.77954	4.66752	4.55532	4.99928	4.56666	4.9082	5.0987	4.52242	4.41671	4.16688	5.16636	4.87319	5.09005	3.65099	4.45492	4.67341	4.46334	4.71994	5.72265	4.69533	4.94203	4.52898	5.05675	5.08381	4.5243	4.8726	4.17537	4.64286	4.75717	4.54411	4.54177	4.55152	5.06491	4.14034	4.82901	4.69022	4.39001	5.58243	4.92777	4.54418	3.48813
ANKRD26	4.86399	4.59072	4.14229	4.85443	4.17691	4.55771	2.95422	4.29716	4.68571	3.25992	2.79622	4.32545	5.0292	4.63611	5.11406	4.23221	4.16601	3.85323	3.75496	4.80228	4.82526	4.80055	3.37876	3.37855	3.28135	4.03685	4.06369	3.11688	4.50356	4.3395	4.61914	4.44729	4.19776	4.48982	4.60772	2.22431	4.75651	4.51909	4.87523	4.9444	4.67411	4.41778	5.11978	4.035	4.30444	5.04597	5.00788	4.89504	4.77694
ANKRD27	9.69472	9.29742	9.12728	9.29816	7.98033	9.19254	9.04499	9.30775	9.32635	9.25012	9.03311	8.77163	9.0696	9.27755	9.09336	9.49552	9.29075	9.55817	9.20156	9.57823	9.19368	8.93918	9.08024	8.62875	8.93067	9.24309	8.85478	8.75575	9.21415	9.15619	9.55248	9.42267	9.27941	9.34367	9.36929	9.81452	9.87546	8.96545	9.45692	8.95034	9.35547	8.95047	9.29171	8.96198	9.40836	9.11196	9.12213	9.49681	10.0379
ANKRD28	9.58431	9.78841	9.71541	8.96357	7.24823	9.31878	9.84469	11.0262	9.6249	9.90695	9.23733	9.80271	10.1512	9.51835	9.84859	9.9808	9.84624	8.9445	11.5242	9.78103	9.70645	9.74356	9.46733	10.1959	9.58394	9.56612	9.31278	9.32561	9.21181	9.19773	9.27276	9.51486	9.81582	9.59031	9.48586	9.48962	9.25644	9.98923	9.85444	9.71625	9.59955	9.50039	9.42568	9.45406	9.41808	9.257	8.80752	9.50594	9.68054
ANKRD29	10.3871	8.58706	8.68669	9.68592	5.87017	9.39128	8.32567	7.55842	8.67779	9.05992	8.14372	7.15904	8.31822	9.6033	8.41599	9.61509	9.21862	9.57633	8.54322	9.25043	7.92799	8.50807	8.21827	9.41281	8.42947	8.25331	7.89671	7.84031	9.99222	8.63354	9.73114	8.18172	8.96858	9.10964	8.41683	8.86527	10.5953	9.01162	8.57908	6.89994	8.57567	7.90808	8.60324	8.40372	9.43001	8.25063	8.60672	8.38099	10.0057
ANKRD30A	1.72386	2.55146	1.78027	2.67993	2.60831	1.79585	1.79899	1.83273	1.86306	1.96626	3.22278	3.13468	2.0823	2.58035	1.73246	2.07629	2.47851	1.85482	1.87535	1.81497	1.76219	2.38675	1.91141	2.04972	2.92477	2.06901	2.98059	2.5003	1.90171	1.80322	1.73916	1.66963	2.15156	1.74995	1.82385	2.13476	2.25	1.72774	1.72645	1.73183	2.5139	1.73884	2.0449	2.03299	2.41055	1.90185	1.98149	1.79366	3.37701
ANKRD31	1.74167	2.09957	1.90072	1.96553	3.19423	1.85224	1.87126	3.07823	1.90706	1.98432	1.95199	1.80839	1.98563	2.74244	1.79882	2.68397	1.60052	1.74366	1.9737	1.82049	1.80286	1.9816	1.82469	1.9075	1.89365	1.86016	1.7598	1.70552	2.22393	1.76539	1.95801	2.11891	1.89094	1.81118	1.76991	1.92393	1.89412	1.89445	1.95695	1.90139	1.97037	1.77253	1.89165	1.87041	1.85439	2.01594	2.03701	2.70579	1.90179
ANKRD32	7.69238	7.2022	7.97736	7.736	6.15461	7.8497	7.3536	7.75195	8.00056	7.17674	7.17987	7.85818	7.4133	7.20821	6.76187	7.12988	7.84084	7.09475	7.10354	7.86765	7.81922	7.40609	7.73421	7.54803	7.60265	7.91011	7.04519	7.39366	6.55299	8.05323	7.48851	7.9075	7.48706	7.75631	7.92603	7.94165	7.48985	7.64377	7.34025	8.06323	7.93265	7.3129	7.82342	7.40493	7.68099	8.13279	7.93875	7.87314	7.69382
ANKRD33	6.54641	5.84416	6.94678	6.52779	7.25131	6.67726	6.5525	6.56673	6.4248	6.56023	6.76131	6.49179	6.45065	7.23849	6.65109	6.18532	6.49214	6.5448	6.6221	6.07323	6.35723	6.38138	6.87415	6.9543	6.43478	6.71171	7.41538	7.03219	6.76822	6.66313	6.10462	6.4114	6.25922	6.98331	6.31909	6.63267	6.16906	6.7793	6.39544	6.03757	6.26474	6.63112	6.5618	6.91988	6.5122	6.56275	6.86273	6.1827	6.25178
ANKRD34A	2.90274	3.68361	3.1815	2.05228	3.16176	1.98168	3.01624	2.03424	4.29721	2.79598	2.77613	3.07481	2.62254	2.13954	3.12543	2.94111	2.02732	3.36761	2.9797	3.26199	2.3543	2.34593	3.62036	3.42835	4.50088	3.61461	3.32335	2.98636	2.0508	3.77544	3.15948	3.59695	2.63142	1.95069	2.84599	3.48194	2.27407	2.99737	3.03527	1.73772	1.84064	2.6565	3.85171	3.07296	1.95652	2.5152	2.2899	3.87833	4.20921
ANKRD35	10.5511	11.5151	10.6976	10.5838	10.3516	10.5428	11.5428	10.8449	11.4794	10.4641	10.9667	11.5713	11.6788	11.3804	11.73	10.2741	11.0458	10.7711	10.2429	11.1091	11.6075	10.4277	11.469	11.0529	12.071	10.7506	11.4954	11.3231	11.1861	11.6295	11.7612	11.0621	11.0283	11.5279	11.1283	11.1525	10.6511	10.9881	10.9788	11.3133	11.0297	11.0826	11.3423	11.3778	10.7521	11.3434	10.9039	11.2548	10.645
ANKRD37	9.37361	9.68846	9.86071	9.06195	8.86505	9.8662	9.8495	10.287	8.83811	9.96149	9.45976	11.1963	11.395	9.96394	10.3814	8.77041	9.17824	8.82551	9.7457	9.83088	10.431	10.233	9.49157	9.14497	8.90132	8.98787	9.41817	9.55279	9.80634	9.48319	9.42042	8.89774	9.75568	9.88032	10.3331	10.3029	8.69438	8.97136	10.2254	11.1494	10.7162	9.96139	9.96246	9.70199	9.85521	10.0092	9.29163	10.2884	8.49534
ANKRD44	6.18144	5.10064	5.867	6.76929	4.30838	6.07128	5.18815	5.03714	5.16511	3.99823	5.11679	4.32072	4.70885	4.92692	5.53645	5.58532	6.7254	5.75653	5.05264	5.67824	5.18739	4.74381	5.54549	5.26821	5.10444	5.669	4.36249	5.14154	5.80737	7.1317	6.01941	5.62633	5.34379	5.24627	5.3891	6.17644	6.99103	6.28186	4.44684	5.86164	4.89398	5.64401	5.57719	5.56433	5.93577	5.76141	6.21003	5.67228	5.89035
ANKRD46	9.18183	8.0808	8.02039	9.38499	6.51045	8.33693	7.60509	7.60636	8.44717	8.33647	8.04907	8.45194	7.80294	8.83619	8.46692	8.28165	9.13736	8.88572	7.72377	9.24344	8.18928	7.64713	8.44953	8.61458	8.33932	7.61818	8.12537	7.87096	8.97637	8.80528	8.83523	8.40973	8.00733	8.24103	8.65729	8.58942	9.8089	8.11581	8.40963	7.86463	8.35327	7.88468	8.26829	8.50945	9.06303	8.33661	7.51365	8.25951	8.92715
ANKRD49	9.61599	9.36514	9.43677	9.30059	7.43839	9.34463	9.19639	9.38678	9.80737	9.31167	8.68888	9.29986	9.23868	9.12692	9.4032	9.7972	9.90396	8.94817	9.64402	9.61804	9.64983	9.56562	9.3845	9.53191	9.20966	9.57305	9.65753	9.33242	9.45029	10.0898	9.36236	9.45101	9.42558	9.4654	9.65157	9.03783	9.72714	9.55628	9.45997	8.70155	9.68739	9.42808	9.68393	9.44273	9.52193	9.75491	9.53676	9.44491	9.39448
ANKRD53	4.76113	5.28238	4.20551	4.34853	5.30998	5.27215	4.48802	4.90531	5.6313	4.8178	5.17189	5.32335	5.03294	5.47407	5.04886	5.52612	4.8204	5.09345	6.45028	5.43307	4.79889	5.12134	4.90085	4.99611	4.44854	3.86625	5.83727	5.13491	4.70575	4.08655	4.812	4.18307	5.12711	4.64728	4.7267	4.88522	4.83808	4.04223	5.25731	5.08469	5.07858	4.6599	4.91023	4.80334	4.76465	4.70105	4.76411	5.18889	4.43265
ANKRD54	7.92599	7.76435	8.07873	7.83053	6.98534	8.53902	8.43504	8.76101	7.71959	8.63221	8.14453	9.06109	8.78037	7.78311	8.42406	8.17358	7.42789	8.02502	8.4121	8.38568	8.90228	8.54031	8.10067	7.67513	7.96294	7.79982	7.81476	8.25145	8.4245	7.77387	8.27625	8.10843	8.43765	8.46071	8.82007	8.53989	7.61122	8.00007	7.99396	9.05776	8.622	8.50581	8.3165	8.37805	8.11245	8.02033	7.76027	7.90721	7.64498
ANKRD55	2.51832	3.32301	2.59646	3.07491	3.37777	2.255	3.46001	4.19426	2.43515	2.74833	2.45864	3.38599	2.04407	2.29561	2.1828	4.04176	2.95557	2.63167	4.12469	4.37516	3.77169	2.09239	3.43698	3.91353	3.07628	2.37941	2.94895	2.83806	2.25966	4.86653	3.63975	3.94728	3.47631	2.74663	2.11395	2.13946	2.41836	3.71459	3.4603	1.55768	1.71238	2.72404	3.01314	3.29951	4.15487	4.91838	4.50999	4.22788	2.97244
ANKRD7	2.89186	2.84976	3.37037	2.22864	4.44109	1.73146	1.77904	2.31451	3.95635	2.42748	2.40331	2.74492	3.12109	2.59062	4.04731	2.2682	2.40212	2.38477	2.45501	2.51417	3.96211	3.12741	3.27509	2.31696	3.19654	2.58209	2.62253	3.3829	2.93379	2.57182	3.32817	3.28283	3.60359	4.05936	3.83544	1.76582	2.13546	1.97109	1.96835	1.97977	1.56103	3.90206	2.74728	3.2328	3.34138	3.40512	1.94382	2.98176	1.76955
ANKS1A	11.6987	11.2351	11.249	12.2712	9.56627	11.4518	11.2266	11.4075	11.0539	11.2577	11.0712	11.2835	11.0642	11.9905	11.1453	12.273	11.6268	11.6336	11.0235	11.7459	11.5817	10.9898	11.4049	11.3221	10.8791	11.0441	10.7478	11.2258	11.8116	11.1994	11.6454	11.3514	11.317	11.4773	11.4894	11.8428	11.8495	11.0125	11.6821	11.3472	11.0111	11.0289	11.3015	11.1036	11.6481	11.3491	10.916	11.5428	11.6678
ANKS1B	2.98643	3.04187	1.88224	1.99611	3.67725	1.98473	1.9253	2.41295	2.32241	2.08075	1.98798	2.39879	1.99924	2.70176	2.1332	2.0242	2.08367	1.86962	2.07435	1.85513	1.94274	2.05242	2.9504	3.23718	1.99735	1.98643	1.86297	2.47018	1.9859	2.15897	2.57802	2.24893	2.45254	1.88711	1.95815	2.00691	2.42387	2.15131	2.14484	2.1718	2.44046	2.69554	1.95116	2.15038	2.59996	2.07528	2.14272	1.99785	3.0341
ANKS4B	1.67459	2.33919	2.04031	1.93349	3.54545	1.9502	1.92592	1.96871	1.97838	1.92508	1.93212	1.7148	1.92529	1.9624	1.91015	2.02243	1.79101	1.75492	1.98374	1.68705	1.71129	2.17298	1.76877	2.00146	2.03794	1.93013	1.80879	1.71385	1.9726	1.9521	1.9378	1.88933	1.94179	1.93296	2.01381	1.9562	1.47582	2.46104	1.86373	2.26095	2.26809	1.64365	1.86804	1.88176	1.90279	1.95062	2.05934	1.92508	1.94873
ANKS6	10.9805	11.3728	11.2093	10.5438	12.3015	11.1138	11.3567	11.1959	11.4251	11.0743	11.0025	11.4412	12.0411	11.3962	11.5524	11.0674	11.1167	10.7947	11.4959	11.2743	11.7127	11.1775	11.0505	11.4915	11.2124	10.7081	11.222	11.3901	11.5266	11.0249	11.866	11.1497	11.6628	11.4023	11.78	11.2497	11.0235	10.6281	11.3207	11.5261	11.7231	11.9122	11.6594	11.3323	11.4171	11.8761	10.9194	11.3038	10.7539
ANKZF1	8.94421	8.53637	8.94536	8.40482	7.89606	8.76031	9.16854	8.83635	8.68277	8.58139	8.30676	9.12826	9.5382	8.23363	9.07703	8.88543	8.78897	8.52319	9.0359	8.91595	9.34594	8.96636	9.02785	8.08698	8.85636	8.84486	8.99004	9.25553	9.15479	9.07982	9.07037	8.98929	8.94955	8.66913	9.08348	8.13557	8.48398	8.91514	8.6431	9.39325	9.05569	9.13817	9.16232	8.40267	8.90197	8.83893	8.71499	8.9822	8.70618
ANLN	5.60934	6.50463	6.91828	4.60981	6.65622	6.06652	6.11533	5.36287	6.31026	4.79712	5.22129	5.68505	5.51403	6.22381	6.11365	7.57096	5.38098	6.05219	6.04271	5.36995	5.29238	6.87774	5.14098	5.93741	4.30361	7.09466	5.18819	5.73831	3.98875	4.27152	5.09008	6.32232	5.70847	6.05249	6.08608	4.59677	4.86082	5.97132	4.71461	5.55383	6.13058	6.64819	5.99193	6.48801	4.66731	5.86596	7.46277	5.92998	5.31317
ANP32A	7.35253	7.63199	7.3378	7.37477	5.7336	7.17582	7.02384	6.36977	6.06869	7.12007	7.3914	7.00854	7.48666	7.24844	7.99151	7.61985	7.19466	7.51015	6.51417	6.77906	7.10855	7.33296	5.20008	5.82273	7.24298	7.52817	7.32829	7.39766	7.91913	7.71728	7.17763	7.34816	6.73107	6.46082	6.9464	6.51465	7.37998	7.28817	6.58994	7.05473	6.80408	7.4087	7.31159	7.80508	8.02559	7.09911	7.34406	7.45366	7.41343
ANP32B	11.2771	11.1646	11.2191	11.3932	10.0384	11.0217	10.807	10.9892	11.0672	11.2233	10.9019	11.0995	11.0562	10.4385	10.7928	11.0211	11.2947	10.8004	10.8887	11.1325	11.2329	11.0226	11.3905	10.3336	11.1747	11.1148	10.8435	10.6667	10.711	11.4131	11.4045	11.3579	11.0275	11.1129	11.1521	11.5413	11.2839	11.2851	11.2465	10.3754	11.2775	10.722	11.0228	10.6984	10.9112	10.7111	11.1978	11.4003	11.4378
ANP32C	6.10523	5.26335	5.50815	5.93007	7.19666	5.94326	5.97418	5.26213	5.24321	5.59739	6.06104	5.59328	5.98701	5.48905	6.41229	5.66577	5.30519	6.09633	5.24466	5.36996	5.5728	5.9165	4.37744	4.97592	5.87779	6.12811	5.80911	5.83857	5.68305	5.78637	5.90142	5.6916	5.0634	5.23147	5.68596	5.51952	5.78162	5.57017	5.56498	5.58659	5.45048	5.75819	5.83697	5.88287	6.04258	6.00629	5.5388	5.82721	5.64348
ANP32D	6.70722	6.94026	6.34966	6.60074	6.67579	6.45406	6.40666	5.83937	6.33818	6.43048	6.77289	6.24714	6.87802	6.44853	6.82801	6.81747	6.24445	6.78269	5.80732	6.5852	6.36001	6.38302	5.31978	5.48543	6.66426	6.92947	6.31719	6.56399	6.5285	6.50354	6.54562	6.86622	6.27961	6.77185	6.26666	6.39424	6.41092	6.39467	7.07824	6.41257	6.47516	6.24518	6.66164	6.56462	6.63206	6.33713	6.63206	6.53726	6.76078
ANP32E	8.5673	8.41747	8.5662	8.18124	6.33753	8.65032	8.47412	8.45225	8.52322	8.13428	8.69329	9.10288	8.14943	7.62559	7.29493	7.16554	9.3043	7.71078	8.27224	8.52372	8.08628	8.09956	8.52251	8.3408	8.58916	9.19129	7.70283	7.67866	7.14825	8.86398	8.47841	8.63686	8.23416	8.59648	8.52001	8.89992	9.15571	8.66927	8.85632	7.33926	8.13494	8.17333	8.3047	7.83956	7.57925	8.62569	8.91323	8.91843	8.62967
ANPEP	9.16956	8.72278	10.4959	8.1127	8.16041	9.70528	10.2463	10.038	8.90824	9.63605	8.63915	8.97408	10.1868	8.95937	9.03134	10.697	8.40984	9.5578	9.59797	10.2257	9.82466	11.287	8.9029	8.31064	9.67672	10.9001	9.13478	8.83938	8.4328	7.44445	8.58996	8.31475	9.51837	9.66446	10.4484	9.21029	8.63385	10.1742	9.62626	10.5041	9.06085	9.68499	9.86696	10.1006	9.7607	9.17528	9.7128	9.65297	9.52342
ANTXR1	11.7509	11.5466	11.0974	11.5799	9.8553	10.9839	11.2278	11.151	11.5527	11.2578	11.5073	11.2787	11.1179	12.175	12.0266	10.9712	11.9525	11.5492	10.3211	11.9254	11.2254	11.2807	11.6891	12.4223	11.9405	10.8228	11.5314	11.5219	12.0487	11.5751	11.8074	11.5176	11.6438	11.728	11.4279	11.3189	11.8088	11.7448	11.3503	10.4323	11.3411	11.2294	11.4775	11.5793	11.5959	11.2873	10.6652	11.3532	12.0854
ANTXR2	6.37016	6.51113	5.53887	6.18398	4.24107	6.2258	5.50618	5.83192	6.18961	6.09414	6.17167	5.76898	6.10735	6.34818	5.6691	5.93615	6.95319	5.67193	5.69818	5.9964	5.67723	6.18069	6.63779	6.1958	6.15804	5.7456	5.54035	5.55638	5.18946	6.21572	6.08272	6.35996	5.61868	5.65106	6.00089	6.07901	6.74039	6.05109	6.44476	4.8162	6.13896	5.17496	6.04317	5.77556	5.93731	5.36448	6.5854	6.0789	6.8724
ANXA1	14.6672	13.8821	14.3201	13.8463	13.2512	14.2076	13.996	14.2065	13.9684	14.4927	13.5095	14.1398	13.952	14.6689	14.6076	14.7374	13.5529	14.146	14.0142	14.6543	14.3844	14.6725	13.6545	13.8278	13.3402	14.2482	13.6128	13.5549	14.2305	13.2741	14.3226	14.0186	14.1007	14.5443	14.6878	14.0255	14.0068	14.1616	14.4519	14.6429	14.6284	13.9186	14.1639	14.079	14.3404	14.171	14.0952	14.1363	14.6872
ANXA10	1.20708	6.51957	3.21118	2.03332	3.69254	4.20122	3.12092	2.80559	4.60516	3.26131	4.13444	4.54597	4.74356	3.17299	3.88853	5.45133	2.85718	4.80935	3.74539	3.90751	2.57077	3.18807	4.0936	6.16235	1.49067	3.12762	4.37204	4.36464	2.02263	1.78102	1.95293	3.7125	4.7378	3.70291	2.2173	1.91219	2.44537	5.51891	5.10642	3.10486	3.41811	3.83126	1.85538	3.94325	2.20615	4.82175	7.01248	5.28444	3.58717
ANXA11	8.6323	8.38412	8.12245	8.43691	8.81698	8.20787	8.43625	7.65863	8.20092	8.50565	8.302	8.28315	8.4368	8.59056	8.6179	8.05488	8.16282	7.68141	8.18296	8.5135	8.34287	8.48133	8.18328	8.15904	8.70515	7.78482	8.14614	8.10624	9.087	8.00528	8.66342	7.99404	8.57634	8.42357	8.25769	8.83603	8.14037	8.47045	8.02668	8.4065	8.30381	7.76126	8.46984	8.08894	8.83724	8.54261	7.56219	8.21129	8.56014
ANXA13	5.87175	3.24916	2.81851	1.93028	4.13467	4.68766	2.90146	6.68821	5.21097	4.0405	4.74468	4.20676	6.50019	2.25504	6.46315	2.51548	2.9435	3.40769	4.25188	5.51861	6.94933	4.46417	4.48864	4.20838	4.49394	3.8532	5.81996	4.36436	3.64446	4.98719	6.20545	5.27589	6.15545	5.79754	4.75882	4.65355	3.59526	3.00629	6.97654	3.01638	5.74697	6.24691	3.17974	5.16175	2.14734	3.59777	2.3802	5.02413	1.88778
ANXA2	11.7245	7.8452	11.9391	11.2641	10.5921	11.9301	11.5348	11.2534	6.92368	10.8111	11.187	11.5494	10.9644	11.9726	11.346	10.3786	10.5733	11.7568	9.21726	9.8976	10.2639	10.9426	10.8028	11.1149	9.92737	11.2867	11.2049	11.2217	11.856	11.0874	10.2935	9.94817	10.1516	10.0087	9.69836	10.0512	10.6822	10.4756	10.3738	11.3441	9.33241	11.0818	10.3096	10.5672	11.9779	11.6261	10.2395	10.5214	10.6901
ANXA2P1	12.2729	12.0762	12.1736	11.6427	12.7334	12.4115	11.7809	11.4847	11.871	11.5719	11.8876	11.7702	12.2748	11.6946	12.1393	12.2376	11.6061	12.2266	11.4856	12.0826	12.0209	12.5335	11.501	10.5675	11.7505	12.074	11.434	11.7092	11.9042	11.2184	11.8504	11.7434	11.8478	11.808	11.967	11.9462	11.6756	11.7656	11.8699	12.2252	12.2395	11.6782	11.9154	11.9118	11.9345	11.5859	12.0801	11.9996	12.2788
ANXA2P3	9.83564	7.93617	9.99272	9.26658	9.50924	10.2073	9.50765	9.22136	8.74634	9.11626	9.46509	9.49097	9.32839	9.58605	9.60027	9.37418	8.96404	9.76066	8.58234	9.20575	9.01511	9.93601	8.97165	8.23245	8.78166	9.48783	9.28118	9.29692	9.63174	8.89925	8.95593	9.00589	9.01386	8.83971	8.95157	9.21397	8.89817	8.8119	8.99392	9.54856	9.30935	9.22576	9.3016	9.67051	9.75118	9.18345	9.30175	8.84341	9.44309
ANXA3	12.3644	11.2805	11.1229	12.1987	8.55138	12.2036	10.79	9.19154	10.796	11.5404	11.2279	9.51543	10.7773	11.7708	10.9358	12.2755	11.2954	12.1456	9.41875	11.6027	10.2995	10.3106	9.75936	11.018	9.56874	9.27055	9.72893	10.5467	12.3457	9.28754	11.3215	10.9575	10.716	11.1423	11.0611	12.0464	12.7412	11.1419	9.90895	11.3969	11.0219	10.3151	10.9809	10.8279	12.1728	10.7523	10.7089	10.6924	12.4329
ANXA4	12.6132	12.7755	12.8402	11.8607	11.3055	12.6762	12.4311	12.1704	12.7431	12.3621	12.6309	12.5462	13.0971	12.6909	12.8504	12.8465	12.4365	12.353	12.2071	12.7481	12.9935	13.152	12.3939	11.9581	11.9822	12.0649	12.0258	12.5833	12.6439	11.7865	12.4904	12.6102	12.686	12.5173	12.9481	12.5674	12.5178	11.9964	12.8439	12.7114	13.0655	12.7428	12.795	12.8411	12.6131	12.4457	12.478	12.6495	12.5013
ANXA5	13.3939	13.6247	13.5932	13.1535	12.3438	13.0541	13.255	13.3459	13.0357	13.5786	13.3543	12.9938	12.8289	13.2151	12.9835	13.7495	13.4805	13.7475	12.9629	13.4514	12.9071	13.7448	13.1911	13.3137	13.1149	13.7882	12.8876	13.1075	13.1704	12.7666	13.1811	13.5787	13.4687	13.3823	13.3641	12.9049	13.4884	13.0434	13.5776	13.4094	13.0893	13.1246	13.2519	13.2622	13.1082	12.867	13.3181	13.5506	13.4901
ANXA6	10.1899	10.7048	10.0526	10.1762	12.0569	9.67174	10.0369	10.054	10.2406	10.0619	10.9058	9.51342	9.99426	9.88468	10.214	10.2044	10.5185	10.0304	9.75845	9.93162	9.74189	8.8857	9.34417	10.241	11.1457	10.2569	10.5018	10.3927	10.3713	10.9584	10.5927	11.0493	9.72336	10.1621	9.73757	10.9421	10.3775	10.1077	10.213	8.28069	9.13038	10.1344	10.0445	10.1267	9.97062	10.6754	9.92376	10.5436	10.5789
ANXA7	11.0708	11.2038	11.5223	10.5037	9.40751	11.1764	11.2895	11.2847	10.781	11.2703	11.1677	11.5881	11.3601	11.8453	11.4853	10.7485	11.3188	10.9673	10.5188	11.0174	11.3342	11.4324	11.1301	12.1431	11.1217	11.2388	10.7921	11.1821	11.6173	11.292	10.9828	11.0781	11.0407	10.7664	10.8446	10.6606	11.0757	10.7973	10.7948	11.6376	11.2022	10.8478	10.9318	11.3177	11.4838	11.2281	11.234	11.2263	11.2433
ANXA9	5.18425	4.85598	4.97688	5.35242	5.5018	5.3649	5.73149	4.5553	5.18226	4.8166	5.38304	3.48663	5.19274	5.59901	5.43898	5.24008	3.84875	5.23476	5.56992	4.24767	4.96202	4.94362	4.36947	4.97219	4.3713	4.50818	4.96982	4.8046	4.50584	4.91847	4.47593	4.75632	4.92507	4.6355	5.23466	4.42141	4.33224	5.88058	4.87255	6.37839	5.01046	5.17831	4.46316	5.61444	4.61878	4.5347	5.66802	4.5619	4.23582
AOAH	7.40658	7.36572	7.79844	8.57063	7.06533	8.01451	6.74515	7.75982	8.26363	8.24973	7.17834	6.46162	6.07842	7.26706	7.43819	8.51274	7.68805	7.52568	7.7796	7.73728	7.35316	7.95036	7.42701	7.92395	6.89519	7.47336	7.59585	7.2999	6.83945	8.24995	7.46408	7.61795	7.71298	6.98026	7.10424	7.15666	7.71206	8.80135	7.14492	6.50557	6.87855	7.43867	7.44714	7.66331	7.38946	6.90375	9.04834	7.62331	7.77255
AOC2	3.29054	2.04721	2.43265	2.15115	3.48141	3.20135	3.00688	2.84173	3.23639	3.54317	3.74644	3.33455	2.58879	2.28871	3.76928	3.88806	3.43276	2.6398	4.38368	3.18018	2.83175	3.89329	2.51475	3.98474	3.45639	3.69321	3.7416	3.56919	2.42839	2.25086	3.6749	4.09134	3.28837	4.55308	2.43827	3.76454	3.0539	4.51698	4.14573	2.69448	2.35937	2.9332	3.47874	3.13766	3.96163	4.55066	4.53634	4.42279	3.75776
AOC3	13.1687	12.7158	11.9286	13.2822	11.4519	12.7944	11.9224	11.7938	12.661	12.6797	12.1602	12.3643	12.0387	13.1676	12.8488	12.6446	12.8189	12.7132	11.448	12.5627	12.2338	11.3319	12.9744	12.1613	13.0063	12.3316	12.0321	12.388	12.5473	12.8598	13.3443	13.2577	12.0857	12.8074	12.1699	12.9613	13.7009	12.3106	12.869	10.9865	11.7943	11.4071	12.7016	12.1567	13.1506	12.9013	11.4786	13.0568	13.4254
AOX1	10.4418	10.5877	9.3676	9.62766	8.0689	9.54691	9.89926	11.289	11.4573	10.4261	10.1691	10.1581	9.43416	11.5232	10.4538	10.1653	10.4979	9.76996	9.31403	10.2318	10.3532	9.03079	10.4794	11.8213	10.798	9.14425	11.7793	9.9359	9.41821	11.3994	10.7143	10.257	10.3997	10.8727	9.33273	9.53063	9.3496	10.0928	10.3817	7.99125	10.8204	9.75452	8.59763	10.0593	9.80059	10.4021	10.8608	10.1733	8.0803
AP1B1	8.06916	7.91545	8.22944	8.16716	9.21613	8.44873	8.17253	8.05039	8.44599	8.29566	8.45531	7.68735	8.05148	8.12286	8.33645	8.79017	8.07869	8.66432	8.18744	8.22019	8.14586	8.65609	7.92276	8.0323	7.95231	8.2206	7.97276	7.91333	7.97944	8.171	7.92254	8.47548	8.45125	8.05587	8.34862	8.05718	7.91652	8.35261	8.23808	8.06909	8.18611	8.24984	8.08913	8.34139	8.02111	7.15556	8.83249	8.0733	8.39237
AP1G1	10.48	10.6029	10.4486	10.3072	9.69825	10.1384	10.5659	10.7918	10.7808	10.6641	10.4434	10.2122	10.3625	10.7734	10.4821	9.896	10.6962	10.3501	11.138	10.5383	10.5091	10.2623	10.6236	10.5395	10.5451	10.9028	10.1453	10.7276	10.5626	10.746	10.9379	10.5041	10.7292	10.7569	10.5313	10.4574	10.6279	10.4406	10.2852	10.9907	10.5142	10.4047	10.5845	10.4365	10.5293	10.8127	10.3738	10.7385	10.4876
AP1G2	8.89393	8.18441	9.03424	9.13861	7.90532	9.05058	9.43623	8.94794	8.88216	8.67357	8.4	8.88377	9.37217	8.40752	9.16473	9.09433	8.86511	8.97838	9.35475	8.81301	9.15862	9.02757	8.79325	8.42788	8.68654	9.15019	9.19912	9.13549	8.76522	8.90677	8.90484	8.5638	8.9301	8.68794	9.19364	8.62936	8.51379	8.85272	8.84857	8.86585	9.13074	9.31556	9.13553	9.03726	8.87936	8.92547	9.03521	8.95267	8.53489
AP1M1	10.1963	9.79739	10.1411	10.3211	10.8936	10.0507	9.88034	9.73898	9.94117	10.1572	10.191	9.18187	9.51775	9.8047	9.67445	10.373	9.99249	10.4798	9.67775	10.0627	9.77494	9.88765	9.99268	9.66067	10.0331	9.83892	9.90123	9.86064	9.98401	9.99829	10.0225	10.1986	9.96695	10.0146	9.86302	10.2264	10.0709	9.99976	9.87645	9.19815	9.63522	9.7154	9.70736	9.79743	10.052	9.29533	10.2481	9.84609	10.3565
AP1M2	8.93464	8.57129	8.81857	8.12331	8.7489	9.05082	9.07368	8.5766	8.61612	8.81949	9.11806	9.06577	9.72468	8.0208	8.95622	8.95391	8.14846	9.24411	9.00011	8.98333	9.18455	9.04172	8.40015	8.06374	8.05649	7.68756	8.18556	8.67753	8.62111	6.78371	8.88496	8.54438	8.73103	8.6436	9.48223	9.43675	8.27553	8.15886	8.80993	9.78721	9.34775	9.19464	8.81748	9.10249	8.65795	8.26764	8.5828	8.70148	8.50644
AP1S1	7.67336	7.77274	7.8439	6.94989	7.70629	7.52539	7.17628	6.84632	7.1437	7.12013	7.75599	7.16869	7.57443	6.58677	7.39801	7.58575	7.35279	7.84447	7.40676	7.20566	7.1717	7.33036	8.07992	6.63582	7.80838	7.4796	7.34114	7.48476	6.78981	6.7131	7.53193	7.66912	7.13156	7.24295	7.76696	7.42066	7.29445	7.39393	8.14957	7.91762	6.90078	7.85122	7.60999	7.06513	7.0559	7.02286	7.75961	7.32888	7.39275
AP1S2	10.6971	10.6657	10.7043	10.4676	9.7483	10.49	10.4695	10.4214	10.6907	10.6411	10.1909	9.60631	9.411	11.0482	10.3952	10.281	10.4208	10.2283	10.0918	10.6355	10.1514	11.1497	9.80069	10.3572	9.99048	11.411	10.1986	9.86221	9.96421	10.8582	10.0185	10.4838	10.39	10.3926	10.1227	9.7144	10.8971	10.7113	10.1468	8.98879	10.1571	10.4058	10.3815	10.7851	10.6121	10.4941	11.1686	10.1022	11.1397
AP1S3	6.53606	5.90831	6.10691	6.36323	6.11224	6.65224	6.46339	6.17694	6.51341	5.83199	6.11777	5.80924	6.37909	6.45741	5.85841	6.36726	6.52621	6.49937	6.01371	5.8508	6.19843	6.26428	5.75143	6.12069	5.649	4.71455	6.12033	5.93831	6.78815	5.49156	5.99248	6.40178	6.10521	6.13485	6.89319	6.8034	6.37587	6.04129	7.28462	6.04753	6.53112	6.48878	6.20925	5.93587	6.85451	5.90769	6.13192	6.14119	7.2127
AP2A1	6.81638	7.38402	6.91273	6.85324	7.64325	6.95544	6.92415	6.96777	6.98445	7.44049	7.5522	6.89698	6.97428	7.22253	7.17697	7.52525	6.91309	7.22945	7.3752	7.04002	6.82374	7.0446	6.98279	7.56199	7.22792	6.96206	7.30555	7.08939	7.13552	7.05296	7.06997	6.93237	7.12912	6.89526	7.00694	6.98319	6.78743	7.34582	7.11483	6.93091	7.0061	7.30578	6.81523	6.94208	6.80494	6.71793	7.48951	6.96994	6.77628
AP2A2	11.623	11.4405	11.0054	11.2314	11.2554	11.3074	11.452	11.463	11.3604	11.5149	11.3185	10.9404	11.1378	11.5068	11.1588	11.6474	11.2458	11.1956	11.0633	11.2983	11.1814	10.7485	11.1907	10.9277	11.0495	11.0208	11.1469	11.1439	11.7844	11.3866	11.3393	11.2789	11.2875	11.1421	11.1219	11.3634	11.275	11.3288	11.4016	10.4939	10.9988	10.8782	11.2083	11.309	11.3907	11.2469	11.1268	10.7989	11.54
AP2B1	9.9153	9.50194	9.397	10.0089	7.57793	9.79852	9.55356	9.25438	9.00706	9.74235	9.54609	8.85796	9.36655	9.02434	9.63351	9.64471	9.80253	9.92659	9.44395	9.4385	9.3553	9.0831	9.01585	8.6749	9.55392	8.78617	9.33296	9.42548	9.64274	9.39464	9.83506	9.62664	9.62114	9.12885	9.23297	9.47911	9.86861	9.62066	9.50183	9.52272	10.0149	9.63746	9.28156	9.49482	9.69205	9.20252	9.00333	9.29033	9.69539
AP3B1	10.5897	10.4369	10.3063	10.3755	10.1121	10.2412	10.3305	10.0299	10.8518	10.5563	10.3041	9.92608	10.0954	10.1847	10.3388	10.9492	10.3864	10.5862	10.4216	10.6011	10.4311	10.6267	10.3922	10.3278	10.4787	10.5098	10.2892	10.302	10.1042	10.3953	10.264	10.6929	10.5823	10.7564	10.5479	10.3538	10.4662	9.90524	10.5982	10.8069	10.7032	10.7343	10.3063	10.4262	10.2836	9.88529	10.739	10.174	10.4746
AP3B2	4.51644	5.24569	5.5738	4.1202	6.36448	5.026	5.09345	4.28386	5.24699	4.01053	4.31414	3.91076	5.31464	3.80411	4.92817	4.3349	3.7613	3.93657	4.4618	3.80127	5.95258	5.49133	4.10428	2.96677	4.92542	5.33321	5.5812	3.55731	5.04545	5.59953	4.69068	4.59123	4.68238	4.31292	4.42726	4.56135	3.74774	3.48432	5.14549	6.11779	5.11772	5.01577	4.66996	4.0256	4.29085	3.89253	3.90174	4.61422	4.33227
AP3M1	7.91201	8.24912	8.07225	7.59189	7.2578	7.75162	7.84679	7.90246	7.97256	7.89852	8.20749	7.49935	7.70979	7.9319	7.99049	8.5064	8.16143	8.11455	7.90829	7.99793	7.80033	8.16573	7.81114	7.88556	7.64598	7.89878	8.30936	7.99063	7.62512	7.55589	7.48798	8.26637	8.03654	7.73078	7.43405	7.64873	8.27412	7.31572	8.155	7.82136	8.10742	8.18149	7.9571	8.06569	7.85043	7.75308	8.38311	7.81473	7.98655
AP3M2	8.77587	8.51581	8.43771	9.37958	8.40766	8.86152	8.79385	9.10715	8.49589	9.03598	8.47798	9.33381	8.92872	8.60477	9.15936	8.30822	8.96629	8.89338	8.71237	8.86911	9.29722	8.87783	8.8786	9.27361	8.80368	8.85609	8.6029	8.78331	9.31835	8.68111	9.08584	8.50303	8.82933	8.77769	8.99675	8.80415	9.27846	8.61053	8.53957	8.92546	8.8252	8.88776	9.10976	8.77336	9.07203	8.8826	8.74023	8.54869	8.94535
AP3S1	11.9788	12.6181	11.9797	11.5319	10.8102	11.8245	12.0412	12.1733	12.4046	12.0077	12.0347	11.8821	11.8906	12.3487	12.224	11.954	12.2425	11.9592	11.9441	12.0605	12.1816	12.3646	12.2491	12.7572	12.3904	12.5818	12.1757	12.1968	11.7058	12.1323	12.3456	12.416	12.3117	12.3395	11.9428	11.7148	12.2625	11.6486	12.1618	11.6756	12.1122	11.9386	12.0682	12.1531	11.8824	12.1744	12.3295	12.5555	12.225
AP4B1	8.95622	8.98318	8.97183	9.42985	8.32388	8.71007	9.29477	8.69382	9.07662	8.90263	8.64401	9.31221	8.68909	8.94389	9.35418	9.06627	9.41051	8.82273	9.35211	8.91279	9.07277	8.90396	9.11797	9.23957	9.17671	9.59249	9.26595	9.13012	9.43961	9.93104	9.19175	9.16884	9.00464	8.89246	9.17815	8.77023	9.52713	9.23367	8.90848	9.16371	8.62744	9.12927	9.36635	8.96399	9.09095	9.58785	9.38906	8.9566	8.67741
AP4E1	9.22604	9.62107	9.51485	9.2008	7.97155	9.56798	9.45073	9.53889	9.66401	9.37148	9.14069	9.53756	9.47329	9.79744	9.87209	9.46305	9.70276	9.43735	9.25304	9.49924	9.28327	9.56526	9.29412	9.78428	9.31964	9.96138	9.60761	9.4825	9.52761	9.40472	9.26462	9.52064	9.42061	9.25972	9.3084	8.79903	9.55878	9.32184	9.22245	9.12979	9.25818	9.67363	9.30346	9.61028	9.51173	9.65956	9.75484	9.25913	9.37549
AP4M1	8.39879	8.37945	8.29118	8.5318	8.09553	8.38606	8.64663	8.52207	8.07861	8.64383	8.19481	8.82578	8.97402	7.84684	8.58965	8.44154	8.41487	8.54589	8.60037	8.55048	8.85349	8.69882	8.46176	8.15387	8.50215	8.44826	8.54963	8.53355	8.68066	7.78637	8.67493	8.08497	8.34092	8.56023	8.86643	8.8764	8.43734	8.29224	8.19778	8.90064	8.43314	8.66293	8.64293	8.30564	8.63341	7.97737	8.39578	8.12711	8.40201
AP4S1	5.96079	5.57062	5.8093	5.88994	4.44383	6.02493	5.80876	6.07723	5.57627	5.65576	5.6611	5.91454	5.9693	6.12995	5.66089	5.75904	6.2069	6.25072	5.94374	5.53704	5.56134	6.06053	5.75083	6.22299	5.49367	5.79319	5.58657	5.65874	6.32357	6.17656	5.76602	5.83131	5.73187	4.98413	5.66733	5.4837	5.95264	5.70688	5.7943	6.11855	5.51909	5.29168	5.52322	5.94224	5.95384	5.85247	5.69149	5.86063	6.14316
APAF1	7.25971	7.28812	7.25599	6.49445	7.71612	6.89735	7.17005	6.91098	7.05862	6.51483	6.80861	6.84102	7.03884	7.72449	7.02531	6.65795	7.33218	6.90148	6.7772	7.01573	6.69517	6.68661	6.48468	6.99997	6.64758	7.41639	6.66164	6.99547	7.11685	7.33534	7.01425	6.84582	6.84873	6.67036	6.83443	6.50585	7.34884	7.24821	6.75531	6.42844	6.86927	6.7268	6.95384	7.03202	7.19307	7.30237	7.34082	7.3853	6.85734
APBA2	5.33302	6.64802	5.55724	6.17467	5.80274	4.66093	5.56742	5.76945	6.36429	5.33911	6.21093	4.60057	4.76025	6.77759	4.88144	6.70284	5.95859	5.99589	6.46373	5.48374	5.6113	5.01989	5.46283	5.25837	6.59569	5.28506	5.77635	5.32234	5.46085	5.95626	6.14203	5.74172	5.71645	5.04194	5.17752	5.29029	5.34506	4.46697	5.81799	4.83064	5.23557	5.48149	5.43448	5.15599	5.74663	4.81406	5.33205	5.63889	6.42618
APBB1	8.42584	8.23759	8.13579	8.56769	9.18201	8.17719	8.26011	8.69452	8.2145	8.67078	8.54449	8.46829	9.03901	8.33777	8.2874	8.16717	8.18861	7.99286	8.08807	8.39678	8.71247	8.08853	8.49419	7.81493	8.41899	7.559	8.13395	8.40711	8.91482	7.98853	8.76294	8.60843	8.24192	8.36163	8.08701	8.71482	8.15722	8.12702	9.29664	8.13329	8.48415	8.35962	8.27427	8.13144	8.35095	7.8116	7.84825	8.15873	8.75714
APBB1IP	8.97924	8.96998	9.44784	8.67171	8.05566	8.92164	8.38849	8.18228	9.11185	8.47876	9.07625	8.23749	8.03731	8.52221	8.51363	8.0242	8.86339	8.97282	8.67531	8.97072	8.27304	9.34074	9.10596	8.6706	8.71346	10.1979	8.75475	8.67136	8.07697	9.96046	8.50145	9.29196	9.07868	9.15778	9.0505	9.1623	8.75434	9.21398	8.94113	7.45291	8.67777	8.30651	9.21847	9.01802	8.63622	8.70755	10.1509	9.2066	9.11846
APC	6.80704	5.8529	5.60121	5.79502	3.92849	5.89103	5.23253	5.25639	5.9806	5.94533	4.89635	4.65481	4.86069	5.94644	5.75346	6.78408	6.40975	5.81209	5.53442	6.43041	5.75114	5.49018	5.43098	5.86888	5.52618	5.37397	4.60242	4.84917	6.28372	5.55609	6.19553	5.9223	5.9688	5.78624	5.9223	6.33433	7.08238	6.00352	5.17926	5.18577	6.00029	5.53734	5.89481	5.48819	5.98841	4.53274	5.49354	5.36694	6.83195
APC2	3.79018	4.29324	3.92916	3.31367	4.74957	4.42283	2.68967	4.34301	4.64407	4.38699	5.01089	4.00135	4.10157	4.11078	3.55858	4.41867	4.26719	5.08627	5.3261	4.30554	3.89556	3.10278	4.47564	5.06232	5.36499	2.85229	3.86231	4.78915	4.24675	4.39768	4.38906	4.41659	4.28637	4.45195	4.29944	4.22685	4.15343	4.91522	3.44969	4.69644	3.96171	4.37208	4.15473	4.18496	3.85419	3.68059	4.90027	4.31855	4.4161
APCDD1	11.0276	10.9765	11.252	10.8352	9.87815	10.5945	10.8545	10.7602	11.9054	10.4742	10.6827	11.5697	11.6236	10.9379	11.3419	11.3518	11.3675	11.0752	10.5585	11.3201	11.8701	11.1941	12.256	10.5289	11.8395	10.8017	11.0437	11.9223	10.7995	11.8389	11.9689	12.4827	10.9932	12.0465	11.7931	11.437	10.5558	10.205	11.7436	11.3958	11.7269	11.4022	11.3383	11.5492	10.8991	11.4713	10.3549	12.3872	10.9447
APCDD1L	2.8062	2.79729	2.1625	2.41802	5.6413	2.90046	3.34368	2.77767	2.28602	2.95611	3.63104	2.36292	3.21338	2.26725	3.01563	2.35759	2.13004	3.15189	2.73153	3.36859	3.34706	3.21612	3.66046	1.56195	4.40364	1.65027	2.53596	3.33169	2.28239	2.23213	2.84016	2.08706	2.4512	3.74644	2.63575	2.20888	1.75158	1.61035	2.36292	3.09147	1.73241	3.53897	3.26448	2.18054	2.10631	2.33858	2.50302	2.18345	2.17243
APCS	4.05577	3.18199	4.13905	4.08192	6.22489	4.04576	3.73908	3.51683	3.36177	3.56108	3.67879	3.94932	3.04996	3.30912	4.29579	3.24072	3.81633	3.82898	4.52344	2.9648	3.50757	3.49769	4.13299	4.64445	3.67259	4.01528	4.22683	4.27715	3.39494	3.9865	3.37658	3.71793	3.5323	4.08863	3.71653	3.31974	3.25749	3.96771	3.328	3.42651	3.94196	3.74758	3.2876	4.05909	3.33484	4.61449	3.05993	2.49484	2.95342
APEH	10.2784	10.274	10.2299	10.1636	9.90419	10.3611	10.066	9.43514	10.1463	9.98781	10.5842	9.62887	10.1184	9.87011	10.1165	10.5942	10.0846	10.4799	9.90927	10.1507	9.91805	10.0925	10.073	9.68143	10.1282	9.79418	10.2693	10.0138	9.99151	9.87728	9.97504	10.3658	10.2542	9.80589	10.0974	10.2482	9.94291	10.0933	10.2801	10.2613	10.069	10.2948	9.91076	10.2652	10.2286	9.52097	10.2852	9.95952	10.0638
APEX1	9.50093	9.79011	9.6825	9.61712	9.14514	9.65229	9.61855	9.66001	9.53585	9.6707	9.76752	9.49715	9.68658	9.50796	9.82298	9.79045	9.65064	9.94187	9.84569	9.70763	9.64238	9.95834	9.71507	9.34119	9.97832	9.6884	9.95695	9.88241	9.52714	9.73179	9.74877	10.0217	9.66012	9.51722	9.42658	9.48668	9.35608	9.44645	9.78359	9.60574	9.8121	9.7866	9.69169	9.5729	9.53177	9.3387	9.82408	9.73322	9.81349
APEX2	9.05267	9.34635	9.11246	9.18252	9.47372	9.37275	9.5056	9.2953	9.48836	9.45073	9.63648	9.26772	9.23583	9.18634	8.99549	9.16762	9.04472	9.48538	9.62454	9.17624	9.30024	9.31902	9.17126	9.40626	9.35814	9.49961	9.4236	9.29259	8.85796	9.07762	8.87815	9.19077	9.31328	9.43062	9.17279	9.36031	8.85694	9.01692	9.16139	9.62997	9.15746	9.2316	9.16742	9.18141	9.12539	9.06321	9.87645	9.18203	8.9753
APH1A	7.54361	7.5545	7.5754	7.35016	7.15041	7.31772	6.39377	6.90739	7.18611	6.92501	7.50433	7.27443	7.28159	6.93896	7.56346	7.82646	7.21291	7.7511	7.37392	7.22859	7.12728	7.73868	7.15691	6.89026	7.41296	7.27179	7.22246	7.2689	6.99755	7.11559	7.94298	7.41645	7.34311	7.32499	7.30579	7.4235	7.80498	7.30445	7.35817	7.51077	7.16446	7.16217	7.17478	7.05722	7.11245	6.2	7.37414	7.65102	7.94407
APH1B	8.68383	9.10578	9.36847	9.27877	7.85655	9.27888	9.1829	9.57449	8.92202	9.06603	9.60933	9.28505	9.53987	8.99463	9.14373	9.4823	9.36918	9.1358	9.4124	9.32406	9.1563	10.0189	9.33577	9.57105	9.1567	9.47632	9.22359	9.25107	8.63453	8.99668	8.94258	9.13194	9.45092	9.62351	9.5456	9.23322	9.45499	9.21429	9.29283	9.2022	9.10198	9.88876	9.12489	9.40613	8.83838	9.00155	9.55945	9.06994	8.67705
API5	7.46186	7.64425	7.4823	7.54647	6.23702	7.51563	7.95841	7.69266	8.2231	7.69092	8.01431	7.46314	7.35054	7.39621	7.22522	8.37061	7.95506	7.45947	7.85027	7.25486	7.53225	7.81725	7.63605	8.54011	7.89226	7.57132	7.61379	7.67114	7.60211	6.95041	7.15724	7.67967	7.65671	6.57181	7.2638	7.32088	7.8858	7.27589	7.81947	7.50519	8.59529	7.78325	7.46857	7.24254	7.46471	7.78085	7.78177	7.46038	7.65474
APIP	9.59448	9.23168	9.565	8.75926	8.26341	9.41674	8.18219	8.29922	8.918	8.40004	9.14906	9.0893	8.84486	9.49632	8.89372	9.47256	8.74278	9.57133	8.25077	9.19692	8.4141	9.07487	8.83739	8.98806	8.47556	9.22256	8.79993	8.77358	9.51375	8.62822	9.0009	8.10437	8.95753	9.42566	9.07882	8.32983	9.29905	8.6463	9.00006	8.85858	9.18165	8.51032	8.94792	9.34972	9.64043	9.06979	8.89445	9.30054	9.33104
APLN	11.0205	9.89273	8.26924	10.3124	12.3651	8.15849	6.74277	5.24428	7.78794	9.6286	11.5395	5.17445	7.91805	11.0177	9.40392	7.40172	9.06886	10.4061	6.11727	9.12981	6.04128	6.40748	8.18626	9.33673	7.24598	7.20135	7.71705	9.1335	10.3396	8.577	10.0462	9.82947	7.57169	8.97216	8.39157	8.94386	11.3649	7.96273	6.72912	7.01099	7.86408	6.12577	10.6182	8.19877	11.061	6.72142	8.90758	7.98484	11.6686
APLP1	4.3754	5.24273	5.14302	4.97019	6.42125	5.00253	4.946	4.79961	5.49361	4.84884	5.68248	5.00281	5.03769	4.35761	4.67304	4.5168	4.837	4.79908	4.92209	4.50084	4.53516	4.62473	4.88518	5.41433	4.69038	5.1662	5.22445	4.30881	4.49416	4.76431	4.51427	5.11377	5.29448	5.62651	5.04599	4.79637	4.75535	4.71391	5.01789	4.44915	4.66085	4.51412	4.43412	4.64309	4.37575	4.96513	5.46521	4.25185	4.56504
APLP2	14.0119	13.1017	13.3797	13.8873	11.8589	13.1436	13.13	13.0021	13.3554	13.516	13.2822	12.6699	13.1639	13.3777	13.5798	13.811	13.5088	13.8675	13.3963	13.5955	13.2499	13.2447	13.1005	13.0417	12.8801	13.0416	12.8097	13.088	13.6528	12.6449	13.8986	13.7616	13.5203	13.7496	13.4769	13.7755	13.8469	12.9769	13.4068	12.7873	13.4537	13.3801	13.4631	13.391	13.5387	12.8774	12.8634	13.5661	13.8227
APOA1	3.40303	4.58059	3.80234	3.09734	3.7387	4.08464	3.18567	2.12596	3.80794	4.97986	5.07873	3.19524	3.22343	3.43806	3.16436	2.77415	3.02601	4.19445	3.17824	3.48868	2.99494	1.96981	3.2644	3.15245	2.54493	2.78046	4.47862	3.84591	4.04828	3.43612	3.01697	4.25452	2.89121	2.75178	2.97179	4.22289	2.74917	3.9057	1.92208	3.09697	2.80215	2.19001	3.47053	3.85839	3.64484	3.99954	2.65829	3.25635	5.3237
APOA2	1.62914	2.77554	3.03594	1.86558	2.52609	1.83019	1.84005	1.86558	3.72759	1.96342	1.86804	2.28657	2.07632	1.88666	2.15117	1.88999	1.65092	1.69462	1.87741	1.63306	1.76402	2.22309	1.81221	2.04417	2.07967	2.02687	1.72525	1.64472	1.92871	1.80318	1.77864	2.93975	1.82488	2.2582	1.83697	1.86521	1.97568	2.35218	1.49589	1.95647	2.25998	1.69739	1.93303	2.61322	1.81268	1.93636	1.98445	1.84067	2.29372
APOA4	2.03476	2.45853	2.13568	2.20998	4.62475	2.16587	2.17856	2.20875	3.00834	2.37866	2.33685	2.61682	2.31258	2.29998	2.60968	2.25973	3.05106	2.02888	2.25879	2.078	2.5537	2.37027	3.99167	2.25183	2.79634	2.57646	2.94552	2.65811	2.27938	2.1337	2.50021	2.78235	2.16822	2.84865	2.46578	2.21835	1.98722	2.39637	2.38993	2.41677	2.39343	2.04922	3.23175	2.60319	2.15345	2.27647	2.94289	2.61918	2.45657
APOA5	3.09275	2.71456	3.0573	2.84942	3.09776	2.34847	2.51105	2.78365	2.47885	2.55934	1.92237	2.03608	2.48782	2.31099	2.39435	2.29926	2.35172	2.43094	2.69535	2.83658	1.78731	1.98615	2.47701	2.77076	1.77909	3.17866	3.2523	2.62085	2.92347	2.13381	2.26281	2.19889	2.44793	2.99992	2.72341	3.34048	2.1491	2.3977	2.39511	2.40591	1.84594	3.05178	3.18403	2.40987	3.07857	2.44999	5.15308	2.13795	2.18406
APOB	1.99793	1.95678	2.07026	2.43068	2.47839	1.7835	2.79649	2.85674	1.84861	2.13573	2.34432	2.59626	2.35494	2.13799	1.96005	2.42145	1.84022	1.95034	2.32429	1.84367	2.3246	2.17322	2.25379	2.51564	2.48058	1.70689	2.22905	2.32012	1.99261	2.81599	2.52017	2.32273	2.08454	1.95204	2.3175	2.75488	2.40727	1.80419	2.57271	1.80823	1.85677	2.30678	1.86723	2.19928	2.39342	2.22331	2.24821	2.30323	2.17281
APOBEC1	1.90607	2.17191	1.98919	2.08726	5.41671	2.5308	2.05203	2.101	2.10135	2.0105	1.92266	1.71232	2.42061	2.10516	1.97037	2.06832	1.3376	1.90026	2.78919	1.94553	1.93441	2.08989	1.97371	2.0318	2.0416	1.97878	1.74432	1.66369	2.08507	1.93826	2.0913	1.94218	2.00363	2.00028	2.06982	2.09812	1.89338	1.45337	1.4508	2.3799	2.1099	1.93956	2.01881	2.30926	2.0198	2.14663	2.18798	2.10308	2.10435
APOBEC2	5.10536	6.1354	4.85141	5.48703	5.4518	4.62299	4.31883	3.03204	4.81583	5.88129	7.23424	4.55512	5.15297	5.66352	5.6705	4.445	5.82341	5.66448	4.9992	4.48002	4.83319	4.3811	4.81659	4.10944	5.16662	4.88513	4.16835	5.55759	5.6115	5.45394	4.84722	4.93731	5.89204	5.2914	5.31552	5.76178	5.42405	4.96083	5.12621	2.96645	4.70744	5.19446	5.68047	6.17228	5.1731	5.7278	4.40713	5.29419	5.67209
APOBEC3B	6.85039	7.50254	7.62431	7.29493	7.641	8.60114	6.99995	7.17952	7.84584	7.52506	6.88314	7.72688	7.57319	7.8521	6.78403	8.26744	7.92471	7.25433	8.84942	7.37537	7.11189	8.37234	5.73519	7.0908	6.22526	7.1707	6.90665	6.34948	6.46704	6.87376	6.17724	7.31919	7.76894	7.09054	7.41249	7.53695	6.92534	7.755	8.71406	5.66062	7.8003	8.38699	7.63677	7.31197	7.40817	6.70961	10.5851	8.16347	7.65095
APOBEC3C	7.8648	7.78082	8.01525	8.24847	7.24844	8.06001	7.81947	6.91913	7.92502	7.61956	8.18558	7.01867	8.09446	7.60137	7.96187	8.34651	8.10529	8.22984	7.41802	7.88159	7.62956	7.75024	8.17987	7.25342	8.00901	7.87143	8.16586	8.15594	8.09376	8.48169	7.53628	8.04238	7.85302	7.92482	7.67337	8.11769	8.1025	8.22459	7.72834	7.20818	7.74712	7.87475	7.9495	8.30615	8.15995	7.89888	8.39317	7.74627	8.00043
APOBEC3D	4.53814	4.25728	4.58472	4.83191	7.13937	4.38735	4.39586	4.61056	4.51841	4.47665	4.06856	5.17249	5.06996	3.43959	3.96375	4.56407	4.15858	4.40099	4.99525	4.93135	4.47068	4.16864	4.79654	4.77748	4.57118	4.45839	5.10162	5.43556	4.34916	5.12528	4.74547	4.99546	4.59925	3.89972	4.88795	4.71174	4.29796	4.50419	4.50056	4.51569	4.57955	4.32315	4.67666	5.02327	4.43591	3.79024	5.22262	4.55307	4.4246
APOBEC3F	7.2178	7.14613	7.43728	7.606	6.25169	7.388	7.14368	6.29269	7.19879	6.26077	7.4804	6.37055	7.5012	6.90048	7.27337	7.74634	7.07032	7.57975	6.51919	7.07446	6.95924	7.16338	7.37497	6.72358	7.30778	7.24112	7.46719	7.37018	7.28074	7.8538	6.87569	7.45162	7.11714	7.31517	7.0228	7.45131	7.22759	7.39026	6.73035	7.14984	7.0932	7.19692	7.40543	7.59247	7.58028	7.33166	7.70967	7.07238	7.40306
APOBEC3G	9.43882	8.27674	9.21458	9.68534	7.23536	9.60399	9.02872	8.0081	9.6088	8.40468	9.15752	8.25506	8.87609	8.93864	9.30701	10.3517	10.1327	9.45131	9.09094	9.11825	8.92339	9.13975	9.75423	8.82218	9.15439	9.25705	9.463	9.57009	9.12753	9.82689	9.31932	9.98859	9.52566	9.0135	9.40078	9.43189	9.99069	9.39893	9.4867	8.31185	9.39428	9.40136	9.22607	9.75796	9.36923	9.2881	10.4116	9.63532	10.3253
APOC1	13.2328	12.9045	13.4425	13.1978	13.407	13.3389	13.0531	12.7148	11.9208	12.3951	13.3905	11.5142	12.0571	13.0011	12.3719	13.6885	13.4646	13.9995	12.845	12.7329	11.9495	14.4269	10.8743	12.4037	12.0162	14.566	11.1492	11.7783	12.5186	11.5289	12.1384	12.496	13.0275	12.5313	12.6948	12.2243	13.238	13.5002	12.6194	10.1725	11.9757	12.3713	13.0437	12.7529	12.6231	12.57	13.3374	13.649	13.1072
APOC2	6.80125	7.24587	7.66746	8.25742	8.31711	8.5887	7.40555	6.77919	3.39925	6.25429	8.9253	6.81146	5.96992	8.23991	6.68276	8.27178	7.02743	7.4132	8.84698	8.0746	6.21319	9.58317	4.37687	7.18545	7.11664	9.20322	5.43733	4.75803	8.11711	5.29653	6.23626	6.38415	7.45563	7.57832	7.51112	8.01439	7.53015	7.16406	6.7921	4.64338	6.61759	6.1084	7.90219	7.50138	7.54684	8.01774	7.53828	8.30563	6.92107
APOC3	1.8468	2.3374	2.00263	2.07304	3.5803	2.05025	2.01167	2.44684	2.08717	2.07476	2.01715	3.10151	2.06578	2.1027	1.96736	2.11925	2.483	3.60013	2.14013	1.89221	1.93309	2.17401	1.95658	2.07428	2.05433	2.01387	1.86029	2.1451	2.08513	1.99881	2.10067	1.9447	1.98952	1.99728	2.02084	2.08284	2.13293	2.00385	2.00233	3.31293	2.15958	1.88584	2.05376	2.04885	1.99245	2.1633	2.22951	2.07342	2.07011
APOD	7.05218	6.71406	5.44682	6.92539	6.49944	7.53046	7.52386	7.92566	7.57272	5.80022	7.64194	7.83784	6.34101	6.88841	8.57245	7.05888	6.08633	5.41379	5.08992	7.059	7.35045	7.19359	7.37504	7.03612	8.6161	6.26053	7.16123	6.7099	6.45612	7.86865	7.05316	6.40682	8.01007	7.69686	6.87256	8.89996	5.01581	6.06456	7.21056	5.57554	6.18215	7.62012	7.60456	7.45287	6.35707	6.13333	6.84956	5.60838	5.16982
APOF	1.70944	2.14473	2.47763	1.91468	3.23385	2.36568	1.8707	1.92345	1.9678	1.96299	1.89409	1.99009	1.95415	1.93783	1.85389	2.03821	2.05301	1.72695	1.98839	2.14167	1.75776	2.01178	1.75329	1.98008	1.8879	1.89097	2.82605	2.92558	2.0041	1.95074	1.88325	1.81564	1.89385	1.8891	1.95878	1.92455	2.10806	1.81534	0.774816	1.95227	2.02533	1.6941	1.81964	1.92284	1.8495	2.25421	2.11703	1.91322	1.89397
APOH	7.68174	7.68844	7.91728	8.10634	5.48878	7.59107	6.53196	6.08188	6.42033	8.05271	8.41163	7.0871	4.9463	7.26841	6.94523	8.03362	7.42374	8.13232	9.62526	7.96811	5.19904	3.01453	7.13944	7.75463	3.74878	6.98584	4.15712	7.19768	8.9722	6.03375	7.60603	6.09715	7.14987	7.56941	6.65239	8.78775	8.21534	7.86659	5.4392	5.45097	5.43895	4.45889	7.87348	7.32344	7.49408	6.85054	6.31466	6.42347	8.64358
APOL1	11.3569	11.1685	11.0777	11.5878	12.7375	12.1452	10.891	11.4235	10.8356	12.2528	11.7174	10.8806	10.6664	11.4774	11.7119	11.5837	11.9536	12.0064	11.4293	10.8238	10.7083	10.2657	11.8142	11.595	11.5273	11.6147	12.3632	12.4401	11.6475	11.7664	11.0079	10.9773	10.9271	10.7264	10.4774	11.3463	12.014	10.9773	10.9756	11.1833	10.612	10.9745	11.0907	11.6755	11.2405	11.1469	12.8271	11.5209	11.8093
APOL2	11.8766	11.4515	11.3224	12.0653	11.4379	11.8532	11.317	11.9993	11.2196	12.8067	11.6637	11.2941	10.8771	11.5605	11.5057	11.9846	12.1224	11.7667	11.5796	11.5056	10.9685	10.8096	11.8252	11.2747	11.6255	11.8118	11.7404	11.9511	11.8437	11.5847	11.6574	11.4979	11.2009	11.2241	11.0486	11.5931	12.0507	11.6869	10.6942	11.609	10.938	11.251	11.5263	11.4376	11.3868	11.5995	12.7882	11.8774	12.1677
APOL3	9.44123	8.09004	8.26479	9.81526	9.57303	9.32372	8.12088	8.71024	8.01339	9.45459	8.11302	8.11504	7.6988	8.95623	8.3897	8.94253	9.42885	9.00519	8.23644	8.76649	8.19048	7.464	8.41383	7.99542	8.41631	8.97784	8.14531	8.35412	9.19531	8.74253	9.03334	8.50919	8.10463	8.20914	8.04674	9.01433	9.7314	8.89334	8.88725	8.91259	7.89546	8.06794	8.61299	8.24207	8.73212	8.68762	9.94027	8.93435	9.74262
APOL4	8.67856	7.15318	7.99158	9.13275	9.77287	8.80254	7.65942	8.33194	7.33594	8.23038	8.06484	7.70296	6.84259	8.2094	7.49456	8.29048	8.73686	8.35874	7.2178	7.64271	7.16122	6.88211	8.05575	7.52989	7.83632	8.32381	8.07682	8.09847	8.61359	8.10483	7.95355	7.89643	7.17047	7.58445	7.11201	8.27739	8.43644	8.71788	8.21994	8.76535	7.12222	7.70861	7.98321	7.92199	8.43125	7.90279	9.41746	8.49717	8.91225
APOL5	2.81812	3.5528	2.47001	2.29034	3.4831	2.34313	2.20326	3.17562	2.41087	3.08076	3.69314	2.64529	2.79824	2.38788	2.63632	2.3307	3.1517	3.02895	2.36555	2.92625	2.75398	2.12212	2.63272	3.51239	3.43606	3.92002	2.85916	3.73033	2.28865	2.11851	4.12499	3.81657	3.57944	3.60924	3.44788	3.81293	2.4446	4.4454	2.70385	3.30747	2.8959	2.80062	3.28286	1.91483	3.24737	2.44787	4.36465	3.47386	4.26729
APOL6	5.58827	4.73226	5.37885	5.23559	4.77415	5.56613	5.05548	4.24916	5.03566	5.23032	5.71676	4.81351	4.74059	4.6318	4.23014	5.7836	6.02477	5.40595	5.54023	5.2047	4.44881	5.02394	4.93484	4.68837	4.92549	4.75163	5.40724	5.06754	4.76838	4.39062	4.78751	5.26678	5.07322	4.74876	4.2929	5.26927	5.94062	4.83104	5.14621	5.07384	4.60897	4.7249	4.87481	4.54214	5.07232	4.06606	6.57408	5.16168	5.7043
APOLD1	8.06091	11.9384	8.61858	9.9412	7.35544	9.2659	8.71165	13.2376	9.7058	12.4699	11.6059	11.0753	9.60949	12.1278	9.11361	9.82177	9.08159	8.92117	12.1705	9.18294	9.8058	8.24338	9.39429	11.4962	9.94671	9.14098	9.68429	9.51449	9.06832	8.76623	10.3148	9.66548	9.38392	10.7144	8.4543	8.47127	7.83604	12.5609	9.89424	11.4117	10.1565	10.412	8.31403	8.31109	9.96779	9.08518	10.1771	11.5773	9.31562
APOM	5.45753	5.17167	5.32683	4.67267	5.48235	5.57552	5.33135	5.34317	5.54782	5.1049	5.90775	5.56207	5.68734	5.83196	5.58397	5.80948	5.41126	5.69372	6.00509	5.44183	5.45538	5.66491	5.90659	6.01044	5.79511	5.53709	5.59695	5.52893	5.87322	5.76498	5.46044	5.35175	5.59521	5.86151	5.34259	5.78491	5.00956	5.56063	5.78754	5.84328	5.51236	5.76231	5.18382	5.35708	5.27005	5.65744	5.52661	5.20168	5.5623
APOO	9.62161	9.45807	10.0991	9.41456	10.1684	9.81588	10.2316	10.7015	9.55204	9.73168	10.0035	11.32	10.6385	9.5415	10.0339	9.57065	9.27172	9.98001	10.0634	10.0571	10.6602	10.3391	9.89195	9.71855	9.9213	9.42725	9.70756	9.78807	9.89011	9.76161	9.89179	9.42903	9.90917	9.84773	10.6609	9.85782	9.32148	9.4632	10.0643	11.0136	10.6377	10.4397	10.1753	10.2367	9.92745	9.85322	9.93822	9.72248	9.33192
APOOL	5.42259	6.46846	5.46995	6.34659	4.37475	6.26333	6.36693	5.78008	6.01031	5.92909	6.43857	6.22779	5.84647	6.02875	5.0608	6.9663	6.10385	6.46351	6.38448	5.51891	6.25887	6.81596	5.52908	5.88896	6.48971	5.65512	6.44695	5.58797	5.40357	5.54505	4.95631	5.48437	5.48884	5.79786	6.83185	5.89218	6.55284	5.64859	5.88187	6.42549	5.64926	6.29471	5.72694	6.20824	5.45922	6.033	6.83208	5.88659	5.60082
APPBP2	10.3942	10.4771	10.0606	10.0088	8.37431	9.8645	9.80535	9.46461	10.6759	9.95848	9.66858	9.78349	10.1928	10.5197	10.4076	10.3218	10.3146	9.80774	9.85822	10.2879	10.123	10.0647	10.1928	10.6335	10.1579	10.0861	10.1571	10.213	10.7311	10.0457	10.3282	10.3714	10.3393	10.2924	10.1393	10.1672	10.5123	10.325	10.1924	9.53103	10.4619	10.0476	10.2477	10.3699	10.1584	10.4151	9.83713	10.2086	10.3743
APPL1	10.0124	9.85349	10.0055	10.1031	8.06847	10.2263	9.46606	9.89072	9.79471	9.85345	9.36099	9.64965	9.80853	9.63717	9.01301	9.51853	10.2999	9.35945	9.43988	10.0783	9.65153	9.52827	9.96424	10.3161	9.68427	9.72623	9.25947	9.17826	8.98867	10.2758	9.61271	9.9898	9.31023	9.86724	10.1183	10.5078	10.4341	9.73362	9.83481	9.44716	9.99257	9.40721	9.6333	9.42521	9.69551	9.5469	9.76364	9.7612	10.2963
APPL2	8.006	7.90984	8.24004	7.92383	7.13199	7.85657	7.81101	8.30595	7.84198	7.57904	7.56139	9.13619	8.37276	7.65183	7.97629	8.00693	7.82268	7.40184	7.37655	8.55448	8.78214	8.26932	8.32532	7.98416	7.70542	7.79955	7.47208	7.70497	8.05938	7.92406	8.31024	8.27	7.98771	8.06616	8.81445	8.4121	8.05493	7.82437	8.30095	9.00102	8.80313	8.11137	8.47128	8.19063	7.87217	7.92949	7.70892	8.29928	8.30007
APTX	8.97815	9.21851	9.11662	9.37393	8.38051	9.27766	9.23904	9.20291	9.47068	9.28811	9.29228	9.83734	9.56101	9.22656	9.55637	9.1846	9.46302	9.13423	9.37227	9.27714	9.47589	9.49968	9.10591	8.95635	9.23805	9.32168	9.53224	9.19768	9.59048	9.33436	8.87345	8.97174	9.28218	9.08322	9.45594	9.27469	9.44486	9.13866	9.13384	9.15391	9.39852	9.30612	9.26903	9.1852	9.29466	9.67166	9.09202	9.20433	8.78229
AQP1	15.5095	16.5821	16.4422	16.4306	15.5403	16.0047	16.0388	14.3402	15.7745	15.8233	16.5453	15.3668	15.0982	16.2311	15.899	16.2138	16.505	16.1998	15.3716	15.9701	15.2741	14.7909	15.2182	15.944	15.3868	16.064	15.3366	15.7945	15.6866	15.4331	15.5376	15.8751	16.2445	15.3816	15.3292	15.8435	16.0546	15.3562	15.688	14.7873	14.4678	15.3257	14.9786	15.8556	15.9676	15.3417	15.6497	15.2893	16.3989
AQP10	5.65825	6.25378	6.64546	5.80415	7.13108	5.2005	7.54179	6.18747	6.04863	5.88456	5.75101	6.1714	6.99097	5.89478	7.26381	5.53824	5.78861	6.10579	6.9707	5.91526	6.95941	7.13787	5.94563	4.0808	5.88054	6.54096	4.85678	5.56145	6.53918	5.5561	5.83135	5.5269	6.95747	6.38196	7.29615	6.19503	5.62937	5.8782	6.76575	7.96069	6.4726	7.61637	6.23291	7.11825	6.25132	6.70847	5.69777	5.84406	5.38859
AQP11	4.06964	4.08481	3.04112	3.97649	4.13549	4.73826	4.14513	3.44657	3.73087	3.96324	2.79502	3.4841	3.53169	3.65111	4.34105	4.25036	4.13528	4.32893	3.92756	4.20523	4.4198	4.82231	4.05437	4.26981	3.56689	3.06598	4.0598	2.67829	4.13498	4.67065	3.96472	3.86934	4.08403	4.29882	4.34038	3.50699	3.92089	2.68981	4.68654	3.90579	4.32435	3.73793	4.05546	3.75347	4.62363	4.12167	3.46256	4.10883	4.10223
AQP3	12.3397	12.5858	12.9176	11.6446	10.6491	11.7635	13.2197	13.0528	12.5288	12.6033	12.9831	12.449	12.7694	11.9498	13.0185	12.7517	11.6904	12.3508	12.0239	11.8428	12.5635	12.2535	11.3058	10.0579	11.5318	11.7306	11.5174	12.1737	11.2759	10.9875	11.9568	12.4295	11.8337	12.6089	12.3234	12.9067	11.8165	11.374	12.2943	13.511	12.8693	12.7786	12.2083	12.1078	12.7636	11.949	11.4778	12.3563	12.326
AQP4	10.1189	9.22046	9.53443	8.88694	5.78644	9.73921	8.80635	6.85922	9.37085	8.86706	8.87556	6.97021	9.29481	9.75629	9.29447	9.76209	9.95008	9.56319	9.41114	9.26065	8.60801	9.03894	7.56145	9.44715	6.76605	7.92432	7.43522	8.4398	9.84656	6.40468	9.40591	8.82502	9.089	8.99189	8.78574	9.0051	10.4642	9.25422	9.61153	7.34359	10.1995	8.54635	9.15543	9.19384	9.8148	9.10755	9.49071	9.08729	10.4004
AQP5	8.18255	8.3105	9.19413	8.14606	9.90284	8.70845	9.92722	10.357	9.93449	9.17889	7.78345	10.4216	10.6392	8.37979	9.84336	8.32952	8.01926	8.42412	9.5988	8.2201	9.83034	9.45824	8.90496	7.42535	9.04572	8.23835	9.72411	9.14672	8.22719	8.00156	8.80947	8.88952	9.82823	8.24244	9.7134	9.75306	6.58995	8.55878	9.52911	10.5211	9.87458	10.1678	9.50821	9.909	8.77647	9.63966	8.77505	9.19425	8.18383
AQP6	2.63752	1.77308	2.29983	2.52788	4.71477	2.47117	6.53463	6.63342	2.597	2.97905	2.30326	5.66864	4.63131	2.80568	4.19377	2.5855	2.34062	3.91242	4.04574	3.52831	5.181	4.12054	3.37752	2.44035	3.40253	2.74977	3.68449	3.27157	2.57006	4.30709	4.29791	2.59286	4.89881	2.42697	4.78267	2.541	2.68385	2.80403	3.29249	3.52209	4.39062	4.5261	4.10745	3.99972	2.44473	4.70578	3.04261	2.53413	2.48994
AQP8	5.00725	4.96361	5.11133	5.0631	4.87647	4.36718	5.04732	4.70176	4.8318	4.76974	5.1405	4.2711	4.64292	4.8087	4.49786	4.8717	4.53582	5.12298	4.45556	4.32212	4.05278	4.39768	4.6389	5.32099	4.7986	5.14143	5.09189	4.85869	5.04543	3.96644	4.29938	4.54596	4.18752	6.01823	4.676	4.53043	4.75378	5.84851	4.43347	4.44032	4.61339	4.74345	4.28163	4.50707	4.94518	4.34572	4.88079	4.14863	4.29951
AQP9	9.71569	10.1343	10.8833	9.50007	7.02294	10.484	10.3536	10.7915	9.8341	10.9293	10.0132	11.4002	9.97512	10.5085	8.64593	10.2214	9.459	10.4308	10.8447	10.6403	10.0146	12.3477	7.58891	10.0354	9.28292	11.7778	9.00554	8.00799	8.85077	9.00924	8.59884	8.71692	10.3266	8.95857	10.6664	8.95116	9.8526	11.3599	9.85144	8.19577	10.133	10.7561	10.0598	10.6022	9.88657	9.41319	11.0425	10.3573	9.53807
AQR	10.0159	9.56848	9.00125	9.86486	7.80411	9.63861	9.43189	9.66804	9.3624	9.70935	9.29684	9.45331	9.5531	10.1702	9.66469	9.6054	9.66284	9.34925	9.57087	9.72899	9.82836	9.43376	9.74194	10.0932	9.75872	9.57166	9.91964	9.58675	9.666	10.2096	9.52221	9.25415	9.59083	9.59578	9.82815	9.92343	9.81924	9.79291	10.0846	9.68653	9.78568	9.66827	9.65171	9.01232	10.1527	9.88905	9.21803	9.24061	9.75181
AR	9.02398	8.71097	8.37868	9.21633	7.3965	8.49431	9.16504	8.7739	8.81952	8.57011	8.59348	9.17934	9.49615	9.34036	8.66089	7.93455	8.65105	8.79022	8.31423	9.01371	9.20869	8.78991	8.87241	9.24171	9.32662	7.78494	8.82837	8.73668	9.03954	8.63013	9.14201	8.6046	8.80409	8.76097	9.37712	9.5513	9.10055	8.74148	8.73694	8.75588	9.46436	9.05334	9.23647	9.02604	8.9297	9.03568	8.34827	8.85583	9.10524
ARAF	9.25827	8.91492	8.94642	9.36863	9.86352	9.16993	9.02059	8.99635	9.09587	9.37984	9.18271	8.58949	8.89872	8.58871	8.90106	9.37631	9.07217	9.09516	9.46949	8.95551	8.85407	9.10731	8.94399	8.87692	9.10149	8.66822	9.0664	8.96811	9.10143	8.91584	9.13623	9.28557	9.19172	8.73671	8.98379	8.98423	9.09172	9.4365	8.69073	8.91047	9.13461	9.2619	8.9008	8.93975	9.06485	8.14348	9.00491	8.8796	9.15447
ARC	5.03744	7.27122	6.13627	8.18546	4.8486	6.1827	5.179	7.64095	5.13818	8.33932	7.00812	3.94237	4.12026	7.49643	5.61498	6.20263	5.25723	7.29103	6.10038	5.36351	4.00122	3.55482	2.0554	5.11656	4.63766	3.82378	5.40671	3.66513	6.27711	4.50864	4.65355	4.91028	4.00099	4.6581	4.42207	7.15564	5.54232	4.82251	5.80587	7.55414	5.34641	3.76647	4.47582	4.87062	6.16123	5.25194	5.05393	6.20921	7.03821
ARCN1	10.1302	10.5579	9.59084	10.2129	9.46966	9.98643	9.97095	10.4843	10.1126	10.3713	9.73985	10.1719	10.2075	9.8599	10.3604	10.5132	10.1781	10.4414	10.2299	10.2921	10.1272	10.1382	10.0988	9.83589	10.2848	9.8949	10.6266	10.3532	10.1752	10.2337	10.0992	10.534	10.1779	10.1661	10.5718	10.4896	9.9652	9.75996	10.3676	10.2705	10.4609	10.3255	10.0888	10.1729	10.1023	10.1724	9.96063	10.0908	10.3156
AREG	11.5341	12.8886	11.6814	9.73167	9.62583	11.1342	11.3178	12.9284	11.7709	13.3588	13.6873	12.2202	10.2106	12.352	11.8182	12.0307	11.0637	10.6291	11.766	11.1949	9.38202	9.95255	9.5811	11.1007	8.66984	10.2888	7.96724	11.0237	8.34968	9.2608	9.77405	12.0326	11.6267	11.2194	10.421	12.3606	8.45049	11.0906	11.084	11.1115	12.1944	11.0123	9.38221	11.0298	12.3005	10.0279	11.3234	11.7067	10.4102
ARF1	9.78795	9.4669	9.70283	9.71965	10.1521	9.52009	9.04297	9.44455	9.57153	10.2022	9.9694	9.35058	9.37939	9.23968	9.7738	9.90721	9.53068	9.93545	9.55446	9.68107	9.40676	9.74121	9.51149	9.12355	9.75718	9.3075	9.49549	9.40066	9.42687	9.39213	9.58772	9.82239	9.71186	9.40053	9.84317	9.90659	9.46877	9.2219	9.58119	10.0719	9.56948	9.66296	9.63305	9.58748	9.54779	8.61678	9.64658	9.65313	9.87135
ARF3	11.9057	11.6724	11.8328	12.0446	11.1591	11.937	11.5543	11.4865	11.575	11.7107	11.9514	11.3892	11.4498	11.424	11.8934	12.0511	11.8277	12.2141	11.5984	11.6684	11.6653	11.7043	11.4044	11.4585	11.7167	11.5253	11.8465	11.7693	11.8555	11.5968	11.8018	11.8155	11.6126	11.6071	11.8442	12.0815	11.758	11.2925	11.7678	11.6848	11.5874	12.0716	11.673	11.7545	11.902	11.3137	11.7924	11.5721	11.9276
ARF4	12.1299	12.7289	12.4793	12.1381	11.3648	12.2141	12.4172	12.6448	12.5333	12.6712	12.8048	12.9587	12.3553	12.8531	12.7084	12.4751	12.4214	13.0717	12.2102	12.4335	12.4541	12.5123	12.5114	12.9029	12.4787	11.9374	12.7651	12.8368	12.4048	12.2648	12.0185	12.5223	12.5246	12.348	12.4004	12.2724	12.2607	12.2198	12.5906	12.6323	12.4751	12.7561	12.3719	12.7865	12.7545	12.5199	12.2671	12.6054	12.4245
ARFGAP1	10.878	11.5263	10.9434	11.1764	12.5869	11.0458	11.4833	11.555	11.3289	11.3785	11.5986	10.8774	11.1176	10.8247	10.9821	11.0322	11.2524	11.0935	12.1185	11.0589	11.2178	10.9214	11.5166	10.8468	11.5857	11.6736	11.1867	11.5837	10.8832	11.2862	11.5421	11.2926	11.3548	11.1927	10.9151	11.0466	10.9421	11.6632	10.8672	11.273	10.8758	11.3479	11.2493	10.8634	10.7539	11.261	11.4305	11.2564	10.8629
ARFGAP3	11.189	11.7564	11.4379	11.1309	10.3535	11.171	11.4766	12.5842	11.9231	11.7267	11.853	12.4917	11.7558	11.5243	11.7763	11.4521	11.7113	11.3928	12.1477	11.7432	11.8725	11.9705	11.9927	11.4683	11.8125	11.5447	11.9305	11.9249	11.3535	11.6237	11.2993	11.8215	12.0306	11.5621	11.7915	11.4798	10.96	11.4714	12.0158	12.0665	11.5783	11.9462	11.6214	11.6597	11.4492	11.6723	11.5468	11.8215	11.4954
ARFGEF1	10.3099	10.14	10.6422	10.2367	8.45014	10.2712	10.3086	10.4925	10.2392	10.3547	9.76541	10.44	10.7324	10.1536	10.1523	10.4734	10.2297	10.1637	10.1447	10.5795	10.3439	10.3819	10.2105	10.5086	9.91214	10.3096	9.89869	10.072	10.0603	10.0699	10.1344	10.3602	10.1802	10.3503	10.8692	10.3313	10.7487	10.3624	10.2903	10.6172	10.5126	10.4442	10.4814	10.1466	10.1369	10.3799	10.0008	10.3058	10.4903
ARFIP1	7.43653	6.80654	7.18458	6.96999	5.59601	7.28243	7.2209	7.49528	6.50593	6.99471	7.51436	7.68414	7.38038	7.44038	7.10478	7.00458	7.28246	6.4383	6.86959	6.89611	7.42572	7.26124	7.06805	6.97823	7.20011	7.17365	7.46048	7.29314	7.31906	7.08295	6.79286	7.40773	6.63756	6.51644	6.71174	6.88173	7.54015	7.07011	6.33796	6.83543	7.23937	6.99276	7.02581	7.37855	6.95704	7.44018	6.97571	7.15447	7.42671
ARFIP2	9.26144	9.58773	9.51609	9.44927	11.0553	9.53583	9.91147	10.5342	9.66389	9.9862	10.0316	10.5784	10.4068	9.11994	9.82428	9.57033	9.07398	9.70377	10.6068	9.72396	10.1156	10.0217	9.72866	9.50876	9.79189	9.39322	9.85692	10.2557	9.63437	9.52309	9.71596	9.58743	9.773	9.75605	10.2969	10.1993	8.80191	8.93102	8.71896	10.0466	10.0636	10.0256	9.83848	9.75574	9.40046	9.77004	9.46092	9.52138	9.14947
ARFRP1	7.56048	7.58515	7.55537	8.01536	8.93292	7.80169	7.64901	7.66068	7.79433	7.91878	7.85837	7.75737	7.83711	7.30808	7.7068	7.63359	7.74542	7.48648	7.8706	7.62133	7.53178	8.10464	7.66343	7.3859	7.91357	7.23361	7.74181	7.48966	7.68888	7.3681	7.54523	7.4766	7.57496	7.21153	7.13956	7.49563	7.58111	7.78555	7.3933	7.73001	7.53759	7.66082	7.43168	7.55968	7.77654	7.13595	8.01216	7.43617	7.65998
ARG2	4.84193	6.92354	5.55443	5.65372	4.73264	5.17272	6.86606	9.52462	7.19979	7.7731	7.44801	8.60115	7.41014	5.91027	6.70979	6.24312	4.91137	5.77932	9.11458	5.89413	7.27673	7.46304	6.58699	5.7238	6.62069	6.46862	6.80653	6.54865	5.39795	5.90916	7.25299	6.74478	6.49456	5.60363	6.5171	6.3825	4.73411	6.95609	7.1705	8.9137	6.34528	7.32025	6.08876	6.41204	5.31021	6.66115	5.68571	6.59485	4.96781
ARGLU1	10.5686	10.4738	10.6777	11.6558	8.91616	11.0389	11.1535	11.1016	10.259	10.6209	10.3825	11.1229	11.093	10.8823	10.669	9.80967	11.2925	10.2408	10.4016	10.6322	10.7101	10.1842	11.1095	11.0215	10.6777	11.0561	10.7001	10.9906	11.3514	10.8094	10.8737	10.5987	10.7225	10.5117	10.4256	10.2653	11.8618	11.276	10.5321	10.5585	10.5489	10.0582	10.8882	10.5934	10.5321	11.3985	10.3935	10.8656	11.2758
ARHGAP1	13.3582	13.8099	13.1901	13.202	13.2452	13.0738	13.3421	13.1317	13.9082	13.0426	13.6644	13.4202	13.489	13.6019	13.8954	13.2223	13.4167	13.3589	13.2664	13.6057	13.4198	13.3181	13.8447	13.8489	14.1528	13.5322	13.8391	14.0907	13.6076	13.584	13.3116	13.8837	13.818	13.4786	13.4285	13.2195	13.3125	12.9659	13.6873	13.1838	13.3837	13.4931	13.3824	13.7271	13.4705	13.2202	13.3595	13.3405	13.3224
ARHGAP10	8.80818	9.11452	9.10832	9.5599	8.80444	8.94077	9.05361	9.92567	8.53204	9.63529	9.07819	9.02657	8.84107	9.19626	8.8478	9.7672	8.50687	8.93685	8.69842	9.34323	9.07566	8.97701	9.01253	8.78623	9.19336	9.28503	8.81938	9.08096	9.20609	8.96086	9.15074	8.99024	8.73443	9.06173	8.48727	9.253	9.08848	8.74071	8.85201	7.86831	8.4043	8.40746	8.66109	8.8119	8.99761	8.84588	9.175	9.39577	9.00157
ARHGAP11A	3.16969	2.43303	2.72599	2.08237	3.12241	1.97866	2.01123	2.05252	2.98048	2.50093	3.38019	2.15885	2.12987	3.3255	1.92321	3.64121	3.0157	3.23399	2.62904	2.27469	2.11413	3.1235	1.60316	2.28642	2.59156	1.91975	2.7468	2.71455	2.06276	1.90556	2.14599	1.85991	2.47456	1.92212	1.8866	2.05884	2.47974	1.67136	2.83737	2.873	2.85532	3.50754	3.01181	3.01284	1.99554	2.24186	3.23203	2.94693	3.41363
ARHGAP12	11.0073	10.9215	10.5022	10.1117	8.72611	10.2885	10.8017	10.5998	10.7038	10.3907	10.131	10.5621	10.8798	10.7545	10.5889	10.923	10.9305	10.0957	10.2556	10.8433	10.6191	10.3549	10.2695	11.1416	10.1069	10.4274	10.1888	10.2141	10.8297	9.98611	10.9133	10.649	10.5701	10.3492	10.3946	10.3815	11.2779	10.7215	10.8714	10.3672	10.849	10.815	10.5994	10.6571	10.5502	10.6085	10.5495	10.5266	11.1054
ARHGAP17	9.82111	10.4092	9.66325	9.6962	8.85506	9.26624	9.76751	9.78285	9.90786	10.3936	10.1052	9.42804	9.38916	9.77274	9.58653	9.55602	9.97476	9.91285	10.422	9.62749	9.69912	9.63305	9.76028	10.5537	10.2309	10.8038	9.91222	9.77379	9.61513	10.4696	9.96662	10.16	10.1323	10.2541	9.61425	9.50668	9.93944	10.8075	10.6264	9.86852	9.27704	9.5714	9.84662	9.75722	9.7438	9.74589	10.4899	9.70526	9.77448
ARHGAP18	10.8063	9.79574	10.7664	11.043	8.88791	10.7588	10.2868	10.3795	9.51346	10.1888	9.90852	11.0222	10.5038	10.3471	10.56	10.4098	10.6386	10.942	9.61607	11.0404	10.7028	10.9303	9.95778	10.4451	9.29133	10.2545	9.32955	9.77505	10.852	9.60978	10.4708	10.0555	10.4871	10.3138	11.0336	10.3276	11.1307	10.12	10.028	11.1496	10.8349	10.3339	10.6717	10.388	10.4027	10.0839	10.281	10.6048	10.9704
ARHGAP19	3.71473	3.46626	3.90661	4.07637	1.44743	2.70801	2.91267	3.87079	2.8659	3.17814	4.26455	3.59543	3.89961	2.83893	3.93248	4.73519	4.33366	4.00262	4.01699	3.84046	3.30903	3.19464	4.38265	4.1721	4.05608	3.14447	3.11844	3.46589	2.83589	4.09709	2.68122	4.10169	4.0912	3.38699	3.72165	4.12268	4.81079	3.69061	4.0547	2.6519	3.5236	2.93617	3.45088	3.8127	4.5053	4.21447	3.16355	2.71261	2.66133
ARHGAP20	8.23936	8.56152	7.07448	7.73952	6.80578	7.26975	7.09035	7.15533	7.72273	6.93534	7.70387	6.75973	7.57392	8.15351	7.86211	6.67107	7.8721	7.65311	7.16384	7.13904	7.34223	6.62571	7.79048	8.18316	7.68194	7.35601	7.36761	7.96503	7.97435	7.58174	8.84258	7.89649	7.33254	8.1519	7.0217	7.6167	8.81076	7.65702	7.52744	5.96934	7.67066	6.79442	7.70106	7.45248	8.2462	8.11591	7.58163	7.3529	8.46274
ARHGAP21	9.38786	8.79615	8.89213	9.22979	7.3464	8.6301	8.74945	9.35465	8.85239	9.01439	8.41717	8.83329	8.63074	9.39272	9.14249	9.28696	9.59535	8.82128	8.44781	9.06896	8.87713	8.79239	8.88304	9.53662	8.91505	8.51989	8.99776	8.71971	9.39798	9.09262	9.2976	8.92328	8.96597	8.83982	8.92828	8.60087	9.64013	9.44474	8.6779	8.96892	8.77692	8.7969	8.97359	8.80765	9.19569	8.96494	8.35384	9.01686	9.3317
ARHGAP22	9.05616	9.04859	9.72605	9.18464	10.5061	9.17876	9.73105	8.40103	9.56045	9.08978	8.97802	8.58937	9.10521	8.61798	9.4301	9.20487	8.7601	9.15243	9.50539	9.42893	9.82166	10.1762	9.55656	9.10729	9.30022	9.98912	9.50507	9.47101	8.79751	8.90827	9.04319	9.43717	9.68829	8.96235	9.76467	9.28267	8.61399	9.44626	9.18006	8.16404	9.46492	9.99964	10.0719	9.60636	8.95843	9.67012	9.9368	8.78249	8.93058
ARHGAP24	8.00932	6.61491	6.82106	6.83303	4.96167	6.77787	5.91768	6.10561	6.5275	6.7179	6.89299	5.64991	6.35931	7.29267	6.48431	7.06143	6.92802	6.90731	6.11857	7.21288	6.6078	6.41481	6.71944	6.57785	6.47762	6.89857	5.83932	6.25566	7.39879	7.04699	7.23788	7.09487	6.83796	7.04304	6.63448	6.40398	7.6129	6.18408	6.74527	6.96363	6.2964	5.89993	6.32029	6.45753	6.74862	6.41533	6.10709	6.71999	7.652
ARHGAP25	11.1189	10.5651	11.5385	12.0202	10.6538	11.6205	10.854	9.89441	11.1314	10.4601	11.2897	10.2758	10.1632	10.6623	10.8195	11.3672	11.6156	11.4486	10.529	11.0846	10.839	10.9053	11.3285	10.6168	10.8904	11.7098	10.7709	11.0552	10.9981	12.1932	11.3788	11.7785	10.7499	11.0853	10.9289	11.3314	11.9119	11.9861	12.4949	10.9461	10.5709	11.2869	11.4342	10.7926	11.2026	10.9018	11.8608	11.064	11.4774
ARHGAP28	4.91777	4.42626	4.94883	4.34203	2.32835	3.72143	2.71663	2.51421	3.76659	1.52566	4.13904	3.13093	4.58756	4.28079	4.45539	4.93082	5.37927	4.19915	2.7643	3.84843	2.73663	3.92791	4.72898	5.63522	4.89493	4.10005	4.32116	3.24783	4.88737	4.57513	4.0737	5.41993	3.56771	4.6472	5.18843	5.63181	5.42765	3.64606	5.38775	3.65388	3.98508	3.82042	3.26646	4.09035	2.48753	4.52039	3.31123	3.28249	4.35036
ARHGAP30	9.81622	9.27668	10.0738	10.0725	9.13305	10.0011	9.47127	8.60242	9.5757	9.66457	9.56394	8.06079	8.21529	8.96617	9.14242	10.2361	10.0632	10.2221	9.06137	10.0416	8.98399	10.0155	9.23391	9.26249	8.92206	10.5525	8.91699	9.01447	9.08173	10.0805	9.37227	10.1981	9.4609	9.51476	9.52905	9.38618	9.90078	9.87185	9.42175	8.66787	9.26164	9.39365	9.68697	9.4566	9.51628	8.88323	10.4854	9.35394	10.1028
ARHGAP5	8.23915	7.92194	7.59044	7.98328	6.38394	8.39161	7.60563	7.99191	7.98521	7.77083	7.43015	8.15042	7.56347	7.87035	7.05876	6.93914	7.73717	7.12997	7.19686	7.78391	7.98155	7.55177	7.64732	7.3069	7.80021	7.19529	7.24765	7.34955	7.61517	7.4504	7.73762	7.61278	7.48809	7.84354	7.84935	8.14923	7.96696	7.76412	7.76146	7.64047	8.29293	7.17649	7.73073	7.49822	7.67625	7.52712	6.87225	7.62485	8.46773
ARHGAP6	8.46118	7.59497	7.73099	9.42775	6.57691	7.9697	7.26953	8.09553	6.78268	8.24114	7.79007	7.54093	7.48788	9.02675	8.15298	8.45505	8.38052	8.13114	6.6708	8.08633	7.65746	7.03012	7.91509	8.6936	7.73669	7.63392	7.63734	7.98278	8.9463	8.03092	8.04651	7.59071	7.59976	7.26476	7.3085	8.33751	9.25415	8.50641	9.19631	7.5192	7.03	6.65036	7.6497	7.90145	8.72292	8.27868	6.84767	7.75877	8.51476
ARHGAP9	10.3881	10.7915	11.0334	11.1877	11.1743	10.5297	10.905	10.3901	11.0495	10.297	10.5212	10.3861	9.37502	10.1467	10.0369	11.1477	10.9541	10.2339	10.3549	10.4035	10.1395	10.607	10.7919	10.586	10.5087	11.42	10.9874	10.689	9.72287	11.915	10.2211	10.9444	10.8659	10.0066	10.5046	10.2409	10.6106	11.4288	10.5096	9.51162	10.0949	11.2031	10.8595	10.63	10.3356	10.6562	11.6088	10.58	10.7255
ARHGDIA	9.72532	10.0708	9.96494	10.1833	11.4032	10.3181	9.90232	10.2581	9.79731	10.1161	10.7708	9.82507	9.60863	9.868	9.79253	9.94498	9.69812	10.7213	10.2871	9.98135	9.76793	10.0422	9.85269	9.35243	10.212	10.1833	9.9257	10.0118	10.0077	10.0907	9.79362	9.84476	9.69997	10.0375	9.57117	10.1956	9.75278	10.008	9.95656	9.83169	9.64266	9.80203	9.64979	9.97041	10.1777	9.70872	10.3416	9.92392	10.1774
ARHGDIB	13.6156	13.3482	13.9298	14.011	12.8418	13.6064	13.2976	12.6115	13.3754	13.3988	13.5034	12.7592	12.9971	13.7113	13.4235	13.9407	13.7988	13.926	13.1062	13.773	13.1572	13.6637	13.346	13.6776	13.0658	14.0384	13.2853	13.2858	13.5967	13.8926	13.5602	13.6217	13.6196	13.4343	13.4916	13.7001	13.7246	13.8724	13.4784	12.7411	13.4977	13.5546	13.529	13.5688	13.6588	13.4478	14.1115	13.4894	13.8939
ARHGDIG	3.99346	2.28573	3.37362	2.91134	3.20507	3.94706	3.00146	3.19627	4.06972	3.02364	3.01982	1.78373	2.75136	3.23865	3.53172	2.63425	3.06805	3.40109	3.70103	3.17556	2.96969	3.62137	3.38746	3.11815	3.31039	1.98804	3.58868	3.58382	2.88326	3.4164	1.98013	3.54641	2.8638	3.11966	3.31308	1.98757	3.01748	2.6188	2.61631	3.25011	2.18665	3.18595	2.20307	3.32132	2.13604	2.92097	2.31736	2.25941	2.81458
ARHGEF1	8.16647	7.65539	7.82413	8.1179	9.15576	7.56264	7.86454	7.49952	8.05089	8.08489	7.72327	7.02052	7.46	7.58123	7.47949	8.46611	8.37256	7.65775	8.25638	7.81253	7.38434	7.38075	7.67628	7.73188	7.65673	8.1285	7.57099	7.73385	7.57989	8.28043	8.36536	8.53546	7.79185	7.34746	7.49908	7.30516	8.39156	8.36271	7.73816	7.65713	7.49465	7.82006	7.82309	7.55952	7.82535	7.30438	8.49728	7.76903	8.12046
ARHGEF10	12.4415	12.5544	11.4881	12.6836	11.8004	12.032	11.4056	11.3451	12.0512	12.9562	12.5192	11.5306	11.1939	12.8265	11.8302	12.1883	12.3793	12.7162	10.962	12.3604	11.4503	11.1129	11.9811	12.4648	11.8869	11.5209	11.6761	12.0021	12.7941	11.4068	12.1917	12.2307	11.4542	11.7465	11.6954	12.3898	13.1473	11.9571	11.825	11.1508	11.7566	11.1751	11.9131	11.5378	12.3618	11.6464	11.9804	11.8507	13.2071
ARHGEF11	8.57461	8.89482	8.3442	8.53416	7.18223	8.7055	8.26132	7.69874	8.71838	8.58927	8.67677	7.72781	8.06195	8.62941	8.46956	8.75373	8.40227	9.49561	7.97559	8.75405	8.38047	8.89674	7.86357	8.50303	8.43783	9.21679	8.06073	8.24025	8.67206	7.91273	8.60416	8.61565	8.19289	8.7828	8.56585	8.71176	8.34035	8.94319	8.31059	8.455	8.47331	8.15134	8.67368	8.38407	8.22284	7.99474	9.34608	8.55488	8.8669
ARHGEF12	7.26708	6.83852	6.63416	7.1857	5.59281	6.724	6.60151	6.74534	6.6905	6.87472	6.70255	6.51262	6.90987	7.40337	6.9852	7.08636	6.92083	6.84182	6.79389	6.94827	6.53321	6.47847	6.6642	6.67534	6.62551	5.95506	6.69551	6.52009	7.13053	6.54239	7.01412	6.79047	6.47122	6.89365	6.9453	7.14312	7.52801	7.06686	6.48854	6.56203	6.72026	6.62296	6.65712	6.63907	7.07398	7.04325	5.51752	6.64195	7.49268
ARHGEF15	9.52143	8.68894	9.37074	10.2611	9.85363	9.78654	9.07657	9.15467	8.82084	8.71799	9.41471	9.09325	8.95616	9.82045	9.3407	9.12739	9.55707	9.81401	9.49789	9.17307	9.04596	7.98326	8.74348	8.95699	9.43194	9.50545	9.64989	8.85498	9.92197	9.29872	8.90204	8.51386	9.26702	8.77588	8.68718	9.62349	10.6635	9.62599	8.40242	9.04665	8.6376	9.3239	8.58626	8.92126	9.57654	8.85034	8.58224	8.56876	10.1121
ARHGEF16	8.72802	8.60768	9.13034	8.58493	9.82109	9.23011	9.83654	9.07138	8.99364	9.10886	8.85736	9.65934	10.3126	8.60339	9.20074	8.96491	8.15416	9.1683	9.64206	8.80352	9.74019	9.7671	8.91823	8.63427	8.73782	8.25739	9.22828	8.89559	8.98273	7.47067	9.19686	8.62359	9.13131	8.87205	10.0456	9.4369	8.67317	8.89143	8.92443	10.1147	9.93332	9.77252	9.43381	9.29048	8.82151	9.30106	8.67045	9.12354	8.61074
ARHGEF17	12.0972	11.9626	11.4271	12.2545	12.3334	11.6152	11.6566	11.6538	12.1973	12.3095	12.0869	11.747	11.7799	12.1096	11.8817	11.7075	12.0236	11.9772	11.8297	11.9578	11.8452	11.3231	11.8591	12.2297	12.2332	11.4909	12.1754	11.9179	12.5377	11.8759	12.4216	12.0671	11.9113	11.7348	11.6112	12.1354	12.2901	11.6021	12.0684	11.5332	11.87	11.6656	11.8658	11.5096	12.2984	11.7361	11.3837	11.9447	12.4749
ARHGEF18	12.0288	11.6314	12.0628	11.7593	10.8284	12.0108	11.8253	11.4453	11.7923	11.6319	11.6118	11.4051	11.9064	11.6423	11.65	12.2265	12.1367	11.8249	11.7588	11.7599	11.6874	11.4967	11.3121	11.8529	11.497	11.727	11.4442	11.5398	11.9375	11.8343	11.7268	11.8253	11.8098	11.6801	11.7252	11.7655	11.7135	11.8318	11.8162	11.7827	11.8508	11.6327	11.5709	11.871	11.9588	11.4943	11.9438	11.6864	11.5771
ARHGEF19	9.25627	9.34636	9.209	8.70714	10.1376	9.08288	9.92565	9.52412	9.34924	9.33831	9.18807	8.97349	10.2195	9.13057	9.61495	9.2651	9.1023	9.42344	9.89296	9.30668	9.85833	9.49986	9.7509	8.51418	9.82657	9.5925	9.88822	9.64311	8.67283	9.1351	9.99944	9.48431	9.39941	9.74063	9.20781	9.35852	8.82487	8.75399	9.48791	9.2625	9.75835	10.1929	9.54783	9.61064	9.12884	9.61366	9.24255	9.77915	8.79517
ARHGEF2	10.8975	10.2465	10.2272	10.5208	10.2968	10.1748	9.99897	9.58812	10.475	9.83081	10.1744	9.23573	9.84876	9.73716	10.1551	10.9593	10.6255	10.1215	9.88314	10.1721	9.68024	9.41547	9.8569	9.77835	9.62147	10.0236	9.58272	9.97746	10.0296	9.78274	10.5368	10.5422	10.403	9.76614	10.115	10.2017	10.7104	10.4274	9.96943	9.58136	10.2867	9.45233	10.2113	10.0988	10.226	9.32405	10.4362	10.1438	10.8143
ARHGEF3	9.94481	9.52561	9.40171	9.75653	8.58357	9.62674	9.49883	9.01178	10.0262	9.89543	9.64202	9.26372	9.37623	9.4037	9.58399	9.95011	10.2116	9.74021	9.62297	9.4706	9.27657	9.44162	9.52607	9.0339	9.47765	9.82853	9.53106	9.38066	9.63637	9.70703	9.48587	9.84369	9.50226	9.59573	9.6377	9.91689	10.335	9.90261	9.52797	9.13326	9.32613	9.20724	9.53346	9.3336	9.58288	9.54933	10.0204	9.60027	10.1471
ARHGEF4	5.41953	3.56736	4.54292	4.81097	4.8887	3.61681	4.6137	4.36978	4.80825	4.66439	4.19624	4.48953	5.05287	2.83498	4.55066	4.9831	5.13756	4.61374	3.2829	4.85688	5.01039	4.73868	4.23006	3.57194	4.48588	2.16304	4.32785	4.06011	5.08977	3.97685	5.66669	3.88335	4.60857	4.1521	5.1501	4.71243	4.69429	4.41347	4.43819	4.31483	4.51963	4.08065	4.50792	4.30975	5.3351	3.51908	3.4489	4.06674	5.73737
ARHGEF5	9.24566	8.82435	8.74655	8.92594	8.32732	9.15709	9.34027	9.42382	8.87571	9.44052	9.32124	9.61326	9.7208	9.03962	9.02355	9.22493	8.65633	9.02389	9.80269	8.74051	9.12543	9.08849	8.80323	8.77569	8.80721	8.28348	9.09316	9.08772	9.17021	7.89567	9.12542	8.71913	9.12282	8.9244	9.06196	9.09812	8.86072	9.05506	9.26366	10.006	9.29953	9.2575	8.86307	8.97333	8.90774	8.96269	8.92783	8.94	8.7352
ARHGEF6	8.11918	7.6613	8.34833	8.76879	6.98367	7.67828	7.35506	6.96225	7.66331	7.44394	7.14752	6.69902	6.92189	7.54164	8.22881	8.11133	8.65289	8.05035	6.61651	8.16533	7.64582	7.82798	7.88133	7.80666	7.55177	7.88094	7.40607	7.36571	8.14761	8.30437	8.04977	8.22617	7.91205	7.55529	7.60559	7.8687	9.04686	8.15687	7.91739	6.49501	7.86595	7.90937	8.37845	7.79421	8.19528	7.39074	8.41347	8.0524	8.32581
ARHGEF7	5.13417	5.53421	4.54401	4.17659	3.53526	4.58692	5.3952	7.14694	4.84541	5.84966	4.87649	6.26371	5.40155	5.94134	5.01617	4.97327	5.15353	5.46391	5.86112	4.6055	5.04245	5.48039	4.3945	5.55464	4.22315	4.62615	4.04175	4.28089	5.24434	3.95067	5.0252	4.57659	4.87918	4.6866	4.4852	5.12015	5.44074	6.24804	4.58223	4.59181	5.10583	4.56003	4.6434	4.34283	5.6708	5.12058	3.78594	5.40273	5.24112
ARHGEF9	6.47493	7.26518	6.6679	6.91635	5.43984	6.67547	6.75564	6.72114	6.96085	5.6575	7.21795	6.71853	6.86374	6.44279	6.76744	6.64322	7.00862	6.99381	6.70258	6.453	6.67406	6.47858	8.85508	7.44516	7.5684	7.18824	6.75708	6.92419	6.61611	7.01292	6.84095	7.06751	6.89311	6.61719	6.80122	6.75889	7.43788	6.35808	6.78993	6.62609	6.50609	6.95291	6.48433	6.69619	6.49648	6.38081	6.7133	6.82735	6.57926
ARID1A	8.56829	8.86465	8.6376	8.9093	6.58249	8.84749	8.57732	8.74571	9.16288	8.94246	8.65507	8.19313	8.49126	8.61598	8.74484	9.30441	8.59105	9.33374	8.80818	8.78588	8.89245	8.73213	8.46506	8.58256	8.77142	8.40316	8.62886	8.40128	8.96718	9.07617	8.61903	8.94927	8.57164	8.65048	8.47488	8.74003	8.56994	8.55128	8.5493	8.55757	9.0372	8.62222	8.82387	8.55307	8.583	8.26149	8.8844	8.8001	9.188
ARID1B	8.73505	8.88942	8.75824	8.83025	8.77174	8.49366	9.05291	9.01386	8.66366	8.0758	8.83544	9.3947	9.25336	8.95439	8.46518	8.58878	9.09642	8.28086	8.79872	8.74689	8.83146	8.59211	8.8068	8.84456	8.85821	8.72502	9.09805	8.762	8.19791	9.02085	8.69465	8.81717	8.78278	8.54006	8.30396	8.80535	8.99345	8.46857	8.46724	8.47277	8.82951	8.56995	8.70927	8.59487	8.69626	9.39434	8.79944	9.15323	8.50065
ARID2	8.74275	8.34089	8.53791	8.63255	6.8674	8.53594	8.45685	8.46779	8.42363	8.57942	7.80293	8.4985	8.67263	8.62478	8.66023	8.73932	9.03698	8.26412	7.99906	8.51948	8.26423	8.41742	8.51959	9.01806	8.33884	7.92973	8.35535	8.2988	8.73326	8.13061	8.13905	8.83541	8.42811	8.37157	8.7989	8.61041	8.76648	8.88896	8.60744	8.21293	8.57345	8.70635	8.30471	8.23501	8.50984	8.3104	8.0676	8.16027	8.75356
ARID3B	10.1451	9.85452	10.1866	10.0625	10.0684	10.1241	9.84258	9.44002	10.4412	10.3055	9.95364	9.5236	9.96108	10.1223	9.84155	10.3024	10.2045	10.1142	10.038	10.0263	9.78643	9.63109	9.99026	9.95353	9.61272	10.2897	9.67851	9.96222	9.97596	10.0836	10.0646	10.0093	9.96921	9.82861	9.96325	9.99142	10.1631	10.1281	10.0071	9.65825	9.94501	9.89462	9.92217	10.0828	10.0068	9.83216	10.0986	10.0616	9.87338
ARID4A	7.30092	7.41979	7.06046	6.64928	6.21728	7.14158	7.10541	6.75802	7.29174	6.10776	6.43856	6.72184	7.17455	7.62029	6.92155	7.10113	7.69244	6.5505	6.71703	7.15431	6.8406	6.96014	7.10202	7.16674	6.745	7.39492	6.63077	7.00235	7.23887	6.92518	7.03156	7.10027	7.0123	6.80286	6.44241	6.33089	7.60694	7.22071	6.97686	5.95832	7.10693	6.62655	7.09855	6.97527	7.03467	7.2317	7.30608	7.09246	7.3918
ARID4B	9.46756	9.36426	9.44871	8.88226	7.71494	9.08463	9.36339	9.68804	9.84521	9.18797	8.59772	9.56851	9.73791	9.47632	9.49583	9.26433	9.99345	8.636	9.25829	9.44666	9.42803	9.50957	9.40186	9.45528	9.11533	9.69549	9.03585	9.19646	8.92402	9.31942	9.64531	9.78215	9.28494	9.36215	9.21803	8.75462	9.81687	9.79949	8.92865	9.76866	9.68666	9.34638	9.54415	9.29992	9.10235	9.69353	9.59283	9.53732	9.58101
ARID5A	9.45191	10.0875	9.72411	10.6487	11.3767	10.0568	10.1494	11.6291	10.3503	11.7872	11.2034	11.0631	10.187	10.7696	9.71308	10.043	10.4051	9.72397	11.4013	9.74534	10.3235	10.0727	10.3126	10.1652	10.5066	10.3789	10.6882	10.2352	9.70775	10.3318	9.68372	10.0435	10.6664	9.70143	9.7863	10.2397	9.81662	11.472	11.0164	9.3398	9.15691	10.0628	9.959	9.85147	9.97969	10.0022	10.9088	9.92369	9.66575
ARID5B	10.9416	11.7042	10.6968	10.5652	10.0881	10.6132	10.8398	12.9735	11.405	12.0831	11.4955	11.8963	11.0271	11.0515	11.2124	11.4016	11.3612	10.5989	12.3369	10.9287	11.5563	11.3251	11.6405	11.5254	10.959	10.7745	11.6865	11.2488	10.6466	11.488	11.4227	11.4584	11.5323	11.4006	11.3395	11.0493	10.8634	12.3025	11.345	11.5413	11.2274	11.2672	11.238	10.6167	11.0522	11.1839	10.7737	11.2954	10.9631
ARIH1	7.18358	7.63987	7.35636	7.45345	6.55228	7.35854	7.69658	8.11878	7.63607	7.7522	7.50322	7.7957	7.57977	6.68083	6.80498	7.3754	7.5908	6.99799	7.29871	7.30404	7.41784	7.58576	7.26556	7.26189	7.35761	6.98466	7.30551	6.75875	6.61217	6.89405	6.76011	7.79897	7.04552	7.32849	7.34494	7.31598	7.69522	7.52714	7.50197	7.72152	7.58345	7.2056	7.24979	6.73332	6.94925	6.53357	6.91186	7.33134	7.73016
ARIH2	11.9533	12.3313	11.7883	12.0657	11.6388	12.0272	12.0582	12.0875	12.2302	12.4231	12.0609	12.0928	11.675	12.1088	11.7639	11.6706	11.7413	11.9494	12.1935	12.041	12.069	11.5127	12.3966	11.8132	12.0982	12.2418	12.2109	12.4021	11.7003	12.2537	12.2045	11.9505	12.0628	12.0202	11.7299	12.1037	12.2529	12.0516	12.1349	11.5908	11.7096	11.8015	12.0063	11.9734	11.9401	12.3204	11.9643	12.1513	12.0038
ARL1	11.2096	11.0337	10.95	10.8725	9.87246	10.9098	10.8992	10.7807	10.9379	10.89	11.0253	11.4019	11.0091	11.2647	11.1526	10.6246	11.4538	11.0388	10.5113	11.2327	11.0965	10.8426	11.3738	11.1275	11.1674	10.6618	10.9537	11.1284	11.257	11.3446	11.0844	10.8243	11.1448	11.4065	11.2323	11.3896	11.2888	10.5663	11.5493	11.307	11.1738	11.0862	11.1722	11.2361	11.3274	11.2706	10.6308	11.014	10.9832
ARL10	4.34026	4.45831	3.5939	4.38106	2.26241	4.55823	3.33298	3.14584	4.75952	3.90673	3.82823	3.61878	4.49517	4.36937	4.08218	2.52329	5.15668	3.8094	4.15489	3.48015	4.25878	3.28439	4.16538	4.32131	4.20119	4.25269	4.05258	3.88303	5.1293	4.90033	4.50407	3.5273	4.66086	3.73514	4.01161	3.49652	4.62141	5.59667	3.57256	3.58385	3.37572	3.51661	4.19418	3.46467	3.90952	2.47621	3.93815	4.13891	4.57485
ARL11	4.24125	1.7775	4.35318	4.93034	5.49559	3.80942	4.06679	3.59368	2.63362	3.65964	3.89154	4.16116	2.56646	2.79132	2.18042	3.40032	4.36462	3.65145	4.90008	4.81168	3.52595	4.1847	4.11003	4.03441	4.50465	5.69062	3.98681	3.88366	2.67186	5.28793	3.59536	3.8741	5.21402	4.26274	4.71414	2.75971	4.82287	5.08885	3.19493	5.35329	2.85353	4.15494	4.00328	2.88705	3.41156	3.25442	3.61089	4.48816	4.44688
ARL13B	8.12778	7.61891	7.62456	7.56698	5.60099	7.81799	7.28015	8.29733	7.7967	8.37073	7.03646	8.05109	7.45404	7.77937	7.5008	8.19276	7.46857	7.41459	7.54674	7.83469	7.70372	7.60942	7.139	7.95274	6.74161	7.2559	6.78231	7.06415	7.70272	7.13429	7.76611	7.50754	7.81473	7.85102	7.66143	7.4103	8.02473	7.26125	7.56748	8.66887	7.89783	7.30279	7.62411	7.34831	7.88161	7.46695	7.13522	7.44229	8.00956
ARL14	3.18029	2.95574	2.80158	3.79613	3.7911	5.25974	4.5058	1.7721	4.2372	2.85692	3.61835	4.36917	1.72994	3.85987	3.17983	5.79675	2.35563	4.86329	2.91608	2.62688	0.95194	4.0962	2.47956	4.0233	3.46312	2.58097	3.33941	4.05421	1.8341	3.1127	1.69885	3.74958	2.92769	3.49635	3.49543	2.06146	2.15113	0.989211	3.47832	4.71792	2.60188	4.30929	2.86976	3.86572	3.13292	2.02085	5.53071	2.87877	1.73241
ARL15	5.48209	5.94644	4.82313	5.35768	3.53257	5.07127	5.28011	4.95796	4.97644	5.03664	5.41352	4.98971	4.93357	5.98043	5.08892	5.34758	5.27693	5.23132	5.67462	4.44083	4.74602	5.51058	4.51352	6.49613	5.41234	5.53242	5.20906	4.43535	5.12394	5.06872	5.41423	5.4717	5.87775	5.66941	4.54396	4.85967	5.82528	5.93747	4.93736	4.56631	5.18534	5.51262	4.88705	4.95102	4.73167	4.79832	5.19794	5.66013	5.68432
ARL16	10.4207	10.4203	9.7893	9.90493	9.32161	10.4224	10.5762	10.2271	10.1153	10.5002	10.2581	10.1774	10.3962	10.054	10.4837	10.2059	10.2438	9.88539	9.85311	10.4074	10.4738	10.2764	10.1365	9.96656	10.6916	10.8149	10.5343	10.0524	9.9078	10.8079	10.5536	9.88658	10.4353	10.5816	10.5951	10.1988	9.76113	10.319	9.69856	10.3587	10.6736	10.5688	10.641	10.4627	10.3812	9.82551	9.80691	9.98885	9.8666
ARL2	10.7159	10.7165	10.3483	10.7149	11.5426	10.6602	10.4316	9.95549	10.5987	10.6264	10.9264	10.1475	10.4451	10.5344	10.6034	10.4931	10.5966	10.8488	10.6095	10.4379	10.4148	10.3068	10.5807	10.3086	10.9165	10.2928	10.524	10.3959	10.6253	10.5259	10.8171	10.6086	10.6777	10.5548	10.1893	10.9806	10.6765	10.4273	10.4295	10.2215	10.5806	10.3235	10.4079	10.5561	10.539	10.1068	10.6295	10.5428	10.7611
ARL2BP	11.5547	11.4468	11.482	11.5207	11.4024	11.4397	11.2253	11.0196	11.148	11.6258	11.5699	11.1476	11.1874	11.9475	11.4212	11.3744	11.5056	11.5401	10.9038	11.345	11.2833	10.9669	11.3149	12.1357	11.4556	11.2182	11.4355	11.4236	11.6937	11.4984	11.4953	11.35	11.2009	11.1814	11.2188	11.4181	11.572	11.0668	11.4128	10.8525	11.4206	11.1547	11.1729	11.5361	11.5735	11.3963	11.0486	11.2416	11.5804
ARL3	8.21636	8.41445	7.63416	7.93356	8.07618	8.05261	8.12706	7.75806	8.08644	8.15969	8.38434	7.63545	8.16272	8.39759	8.50781	8.09452	8.14219	8.27706	7.8352	8.06732	8.23758	8.08567	8.11528	8.0225	8.40577	7.54715	8.12253	8.39048	8.86474	8.06199	8.70421	7.95155	8.04302	8.3267	8.29395	8.5383	8.05942	7.72816	8.34587	7.41369	8.02023	7.93041	8.10384	8.19504	8.19386	8.09151	7.47525	7.92688	8.53313
ARL4A	7.62139	7.74578	8.47472	8.10732	7.46717	7.87865	8.5008	8.57906	6.49639	8.76724	8.11714	9.21388	7.62204	9.12634	8.68658	7.56867	7.23059	8.02291	7.28335	8.17137	8.43647	8.07176	8.28777	8.12311	7.46614	8.25954	7.83816	8.261	7.71744	7.78762	8.35924	7.74112	7.87341	8.63953	7.53374	7.31926	6.97205	7.77363	8.47922	8.69194	8.13312	8.19663	7.98193	8.1465	7.87516	8.78645	7.00207	8.46304	7.55
ARL5B	5.40712	6.05661	5.44649	5.60515	4.32537	5.58924	5.17095	6.24739	5.89094	6.66497	5.67835	6.1162	5.87634	6.24901	5.6381	6.42318	6.09212	5.48416	6.31267	5.18542	5.34898	6.03614	5.01247	6.10615	5.42779	4.71749	5.58589	4.98086	5.15087	5.10738	5.41071	5.88972	5.74333	5.41649	5.59248	5.81703	5.88367	6.61784	5.26532	6.76643	5.92084	5.45479	5.39002	5.4981	5.32332	5.25408	6.02628	5.95116	5.68017
ARL6	5.29727	6.02286	5.17262	4.85024	3.61275	5.41213	5.46089	6.09711	4.84494	5.13742	5.34908	7.06878	6.53188	5.83114	5.95275	5.53296	5.45094	5.4098	4.96735	5.82129	6.6928	6.21397	5.16037	4.41586	4.58437	4.79017	4.34171	5.20258	6.22086	4.15772	5.78204	4.83785	5.69815	5.47204	6.08675	5.63138	6.13537	5.75479	5.13023	5.14314	6.42311	5.7298	5.84077	5.74117	5.89757	5.75558	5.29367	5.80344	5.54377
ARL6IP1	10.2933	10.5115	10.5469	10.1463	9.06475	10.3493	10.0581	9.95304	10.1412	10.2052	10.1906	10.0057	10.008	10.5095	10.135	10.5175	10.4548	10.3126	9.68147	9.94395	10.2115	10.4391	9.9188	9.95647	9.78377	10.3935	9.90816	9.78247	10.4116	10.3923	10.1787	10.4129	10.1259	9.8395	9.71843	9.49069	10.6299	9.69937	10.1071	9.72927	10.332	9.90593	10.2187	10.3598	10.2671	10.138	10.2683	10.6624	10.4307
ARL6IP4	13.5181	14.3747	13.8091	13.7265	14.8699	13.8222	13.9236	13.3817	14.1624	13.7882	14.089	13.7333	13.6817	13.9914	13.7669	13.6363	13.5994	13.6629	13.9579	13.6141	14.0117	13.7183	13.8918	13.3145	13.9609	14.2194	13.5434	13.9577	13.9499	13.7483	14.2268	14.0263	14.0442	13.8237	13.3876	13.6343	13.8063	13.7787	13.5721	13.9295	13.7164	13.5476	13.8635	13.7224	13.6866	13.896	13.9853	14.3204	14.2918
ARL6IP5	12.4858	12.7941	12.7765	12.1801	11.2413	12.4371	12.2301	11.5832	12.3238	12.0965	12.7171	11.847	12.0381	13.0907	12.5787	12.6036	13.0768	12.4655	11.6441	12.4187	11.8472	12.3507	12.4635	12.9308	12.3344	12.2906	12.1552	12.6452	12.4998	12.1825	12.0416	12.3413	12.7426	12.2776	12.3537	12.1891	12.7051	12.5878	12.1189	11.8196	12.2333	12.3793	12.5031	13.079	12.262	12.3366	12.7607	12.2166	12.4928
ARL6IP6	9.53099	8.86058	9.45956	9.29885	7.74056	9.19995	9.22967	9.03204	9.20398	9.2874	8.85642	9.3426	9.13165	9.62983	9.15637	9.52532	9.4774	9.4312	8.99382	9.26322	9.06347	9.23654	8.84559	9.91388	8.57288	9.45623	8.9833	8.79637	9.49919	8.83389	9.12358	9.06396	9.19942	9.29087	9.05992	8.97014	9.96988	9.24554	9.23904	9.26615	9.06165	8.9276	9.32909	9.2757	9.42817	9.25737	9.36382	9.25001	9.47762
ARL8A	12.0851	11.8092	11.824	11.8917	11.8443	11.5895	11.9513	12.223	11.2837	11.9526	12.1436	11.6816	11.9737	12.22	11.8765	12.3415	11.643	11.8196	11.6872	11.9064	11.5446	12.0443	11.4173	11.9159	11.6553	11.9322	11.609	11.7724	12.0995	11.2836	11.9418	11.9312	11.6807	11.6366	11.8185	11.7992	11.7885	11.7793	11.6285	12.0105	11.7	11.561	11.7811	11.7357	11.9801	11.543	12.0642	11.9618	12.2179
ARL8B	12.1234	11.986	11.9952	11.9131	10.6138	12.1355	11.7094	12.1748	11.9382	12.178	11.7422	11.9506	11.9562	12.2015	12.0282	12.2094	12.0375	11.934	11.8898	12.0026	11.8092	12.1895	11.7027	12.1606	11.5916	11.9255	11.5677	11.7018	12.0176	11.4752	11.8801	11.9384	11.7458	11.8512	11.666	11.5741	12.2754	11.6592	11.909	11.9744	11.8674	11.7659	11.8746	11.9835	11.8399	11.9533	11.7098	11.8826	11.8917
ARMC1	9.72477	9.70863	9.66114	9.36078	8.27386	9.61993	8.97163	8.99142	9.73273	9.14185	9.27341	9.72778	9.29931	9.14295	8.9827	9.32263	9.87138	9.40925	8.86885	9.89025	9.57438	9.47521	9.30962	9.75043	9.7185	9.29951	8.95762	9.08208	8.67233	9.74521	9.4658	9.76947	9.35548	9.54928	9.86743	9.66161	9.70792	9.50187	9.15757	9.12351	9.81605	9.25933	9.69167	9.23644	9.58708	9.27082	9.33075	9.63265	10.025
ARMC10	9.0853	8.89619	8.92611	9.13771	7.56768	8.88612	9.05207	9.09722	9.29282	8.94679	9.10638	9.18353	8.8513	9.38496	8.94427	8.96393	8.87141	9.08285	8.63503	8.8722	8.81885	9.32286	9.08317	9.63043	9.23068	8.65894	9.12221	8.98359	9.22784	8.731	8.75233	8.45059	8.89962	9.0679	8.9606	9.31432	9.04965	8.78799	9.13132	9.11346	9.07795	8.95346	8.76565	9.02724	9.26	8.92777	8.91328	9.09888	9.13871
ARMC2	6.98735	5.62002	7.78055	4.83273	6.51601	6.72275	7.40052	7.96268	6.51263	6.41407	6.19704	9.34339	8.65413	6.09939	7.81522	6.19495	6.15916	6.51839	7.52814	7.99621	9.19064	8.75313	7.16778	6.1879	6.53669	6.3704	6.02984	7.1787	7.83235	5.62767	7.5203	6.67837	7.99015	7.80635	8.93735	7.68155	5.69046	6.81464	7.10122	8.93971	8.83771	8.45638	8.15062	7.77408	7.30288	7.81073	6.36079	7.64249	5.55237
ARMC4	8.23892	5.48525	9.30137	5.24694	7.16488	8.14386	8.91554	10.1475	7.09088	8.51182	7.23014	11.2007	10.8635	7.71988	9.74792	5.34467	5.133	7.7367	8.25571	9.93906	10.6066	9.8289	8.87671	5.91441	7.33937	6.9454	5.84575	8.97769	9.76411	6.0414	9.36796	7.16541	9.78874	9.15098	10.5531	9.16427	5.36535	4.14324	8.71396	10.9524	10.5177	10.0228	9.8312	9.53155	8.64185	9.48867	6.78843	8.90131	5.6803
ARMC6	8.96015	9.09383	9.3847	9.10331	10.7519	9.91076	9.28578	9.33164	9.06071	9.51375	9.73523	8.82191	8.80803	9.27503	9.46349	9.41981	8.72016	9.80109	9.36048	9.18649	9.08878	9.07815	9.49218	9.51011	9.56799	9.22139	10.1219	9.93417	9.40484	9.80626	8.95049	9.33123	8.80122	8.91389	8.83034	9.26387	8.94878	9.26981	9.21453	9.24192	8.99794	9.47178	8.98474	9.43696	9.41763	8.72625	9.41192	9.08058	9.10453
ARMC7	9.30247	9.55766	9.2534	9.55481	9.37309	9.49889	9.16896	8.66903	9.18641	9.76273	9.69685	9.00287	9.25295	9.0447	9.15386	9.05824	9.08796	9.69789	9.86282	9.35101	9.18171	8.98775	8.89616	8.6135	9.1122	9.2717	9.11863	9.25318	9.26939	9.10991	9.27946	9.14983	9.10789	9.29568	8.92805	9.53099	9.21723	8.86846	9.19598	8.69983	9.14026	8.79838	9.11369	9.15722	9.0343	9.01294	9.35305	9.22745	9.48346
ARMC8	7.77599	8.06046	8.38586	8.17499	6.24898	8.21517	8.13391	9.16826	7.67597	8.30945	7.97298	9.00756	8.45588	8.74346	7.86312	8.29404	8.18217	8.12274	8.2937	8.32782	8.12228	8.35942	8.01723	8.68233	7.61562	8.06902	7.55034	7.83066	8.0834	7.7805	7.84496	8.13867	7.84916	7.69765	8.1221	8.48743	8.45426	8.28757	8.1757	8.72325	8.41371	7.92404	7.87123	7.67904	8.20745	7.87277	7.64737	8.49015	8.32956
ARMC9	8.18476	8.6555	7.81386	7.3091	8.30437	8.07644	8.36015	8.14315	7.95209	7.89055	8.20313	8.29493	8.07238	8.0189	8.31094	7.84343	8.0945	8.38974	7.90042	7.89924	8.007	7.96374	8.03608	8.20433	7.59703	7.7679	7.37954	8.20057	8.04655	6.43427	7.97247	7.824	8.01122	8.70779	8.1028	8.30613	7.5858	7.84257	7.80457	8.45876	7.9424	8.17525	8.17795	8.26098	8.17015	7.74597	7.81685	7.93095	7.56665
ARMCX1	10.7478	10.3254	9.98163	10.0796	9.62509	10.0865	9.84156	9.73434	10.3155	9.92815	9.81252	9.75707	10.5595	10.6192	10.4984	10.379	10.6528	10.5228	9.41341	10.5432	10.2426	10.0016	10.4181	11.0939	10.5146	10.242	10.572	10.1304	10.9324	10.4611	10.905	10.3784	10.4271	10.1106	10.0503	10.3894	11.2343	10.1675	10.3863	9.20549	10.266	9.91222	10.4722	10.5815	10.266	10.2096	9.81545	10.4046	10.9798
ARMCX2	10.4827	11.3711	10.2465	10.4358	9.63419	10.312	10.7158	10.0405	11.0377	10.8023	10.8536	11.0804	11.0581	10.4599	10.914	10.0672	10.7928	10.9889	9.76791	10.6782	10.5028	10.2752	10.7552	11.2232	11.0454	10.2232	11.1586	10.7841	10.8417	10.6329	10.4592	10.6655	10.8495	10.6191	10.3387	10.4542	10.9875	9.918	10.8981	10.1931	10.7911	10.2373	10.8407	10.9659	10.4004	10.8276	10.4741	10.6978	10.8532
ARMCX3	9.01668	9.15247	9.03098	9.44466	7.48199	9.34327	8.79593	9.71565	8.04673	9.22809	9.45796	9.59682	9.11693	9.32476	9.31895	7.6121	9.73291	9.16681	8.62587	9.05076	8.37616	8.63202	9.69652	10.3772	9.2451	8.54202	10.0487	9.53795	9.16694	9.8149	8.77238	8.28882	9.0813	9.12657	8.98924	8.65386	9.49284	9.61882	9.55345	8.3744	8.75907	9.02822	8.94642	9.55232	9.37385	8.89656	8.61609	8.92715	8.6716
ARMCX5	9.26327	9.22994	9.19374	8.79726	8.6117	9.0496	9.28542	8.54847	9.36712	9.01789	8.85464	9.22954	9.74679	9.76947	9.48407	9.07624	9.19826	9.37859	8.96653	9.11515	9.24529	9.4884	9.08523	10.0583	9.15949	9.35628	9.15248	9.29648	9.44841	9.21014	9.35837	9.09387	9.46672	9.39649	9.1451	8.51035	9.45304	9.16452	9.55345	9.49564	9.45665	9.38082	9.03183	9.40742	9.27339	9.28897	8.87021	9.14879	9.14743
ARMCX6	10.4959	10.7283	10.3529	10.4459	9.66871	10.3715	10.6491	9.56762	10.5752	10.2827	10.7172	9.70495	10.404	10.2296	10.5081	10.6523	10.7296	11.1072	10.4466	10.3438	10.0743	10.3304	10.4629	10.3742	10.4725	10.8	10.46	10.593	10.5679	10.4597	10.5344	10.6438	10.5329	10.6938	10.2906	10.5067	10.8395	10.3496	10.6006	10.4153	10.3018	10.2741	10.5897	10.5889	10.2772	10.3182	10.4625	10.2008	10.6822
ARNT	8.86427	9.42623	8.70891	8.54518	7.57077	8.42064	8.88479	8.63248	8.9477	8.60565	9.19989	8.38607	8.72869	9.21759	9.30177	8.65249	9.41124	8.79031	8.49314	8.61148	8.70248	8.47783	8.843	8.88566	8.92911	9.373	8.98482	8.9292	9.08634	9.26465	9.32605	8.98609	8.6223	8.94747	8.60219	8.46261	9.35584	9.41621	8.37773	8.78694	8.69522	7.93119	8.45973	8.89208	9.13352	9.7828	8.74557	9.18671	9.05582
ARNT2	9.19943	8.95126	8.99267	9.56435	8.45406	9.11618	8.6463	9.31676	9.16029	9.52925	9.48194	8.99975	8.83295	9.33998	9.52791	8.7705	9.74378	8.87656	9.87091	9.48871	8.34132	8.9766	8.80909	9.83461	9.05282	8.66972	9.37944	9.00115	9.87091	8.87358	8.80602	9.01531	9.36308	8.69261	8.66557	9.23678	9.62741	9.06466	9.46804	8.63463	8.78204	9.49314	8.5564	9.81102	9.55031	9.66871	9.39709	8.97224	9.87881
ARNTL	9.32099	8.68563	8.75976	8.2437	8.35016	8.49518	8.87678	10.5152	9.18574	10.3204	9.80469	8.16424	10.8107	9.50028	9.95288	8.56803	8.69818	9.44149	9.95453	8.21181	8.9766	8.37214	8.00867	8.84558	7.58184	8.85889	8.50157	7.85714	8.78659	9.22299	9.16676	9.05211	10.2544	9.55094	8.43099	8.26021	9.65417	9.16769	9.12387	9.58308	8.20678	10.0306	9.98417	10.3026	8.02988	8.18766	9.42567	8.0143	7.95868
ARNTL2	5.36547	6.83594	6.08335	5.48238	5.69519	5.88521	6.63495	7.23393	6.64771	8.22197	6.50304	6.36315	6.10099	5.12159	6.13183	7.16825	6.71804	5.62036	7.0369	6.1413	6.38526	7.1157	6.42827	6.40104	6.85203	7.05701	6.06549	6.47819	5.13835	6.01778	5.29666	6.86827	6.39288	5.75507	6.165	6.00547	4.57468	5.22618	5.22365	6.48179	6.13408	6.72856	6.32852	6.30268	5.57967	6.13372	8.59386	6.1366	5.80544
ARPC1A	11.7324	11.7568	11.5093	11.6952	11.4543	11.4645	11.5865	11.6393	11.7612	11.7787	11.8617	11.548	11.6194	11.4787	11.8924	11.5487	11.6059	11.8182	11.78	11.8526	11.9036	11.6641	11.7689	11.6391	11.9675	11.4225	11.8092	11.7452	11.7728	11.6545	11.5634	11.5862	11.9143	11.8544	11.9795	12.13	11.7067	11.4242	11.8754	11.9385	11.8682	11.8904	11.8134	11.8346	11.7174	11.7522	11.3375	11.5069	11.5931
ARPC1B	12.722	13.3688	13.293	13.1702	13.2963	13.2378	12.8331	12.4091	12.8614	13.1591	13.329	12.1911	12.4411	12.9029	12.7426	13.2037	12.9361	13.36	12.7962	13.0249	12.8633	13.3737	12.5217	12.7895	12.5804	13.4035	12.5526	12.7388	12.4294	12.7154	12.4626	13.0871	13.1093	12.9927	12.9618	12.8174	12.9847	12.7783	13.1486	12.9321	12.4923	12.8245	12.8376	13.0065	12.8264	12.2812	13.5485	12.6685	12.9392
ARPC2	14.408	14.5119	14.7296	14.759	12.8517	14.7178	14.2498	13.7729	14.192	14.6674	14.5733	13.6692	13.7556	14.0168	13.7259	14.8699	14.3629	14.9441	13.9082	14.8237	13.9454	14.6327	14.0378	14.3097	13.9304	14.9313	13.5679	13.7882	14.0052	13.8099	14.0099	14.3157	14.1713	14.3877	14.4078	14.4201	14.3434	14.9539	14.1298	13.7575	13.9849	14.0227	14.1857	14.0992	14.4603	13.8218	14.759	14.3213	14.8794
ARPC3	14.19	13.7785	14.3431	14.2399	13.0075	14.1908	13.8891	13.6532	13.5773	13.9092	13.9188	13.8056	13.8104	14.4429	13.7961	14.4201	13.9545	14.4742	13.4132	14.3913	13.7343	14.3082	13.7072	14.3695	13.5574	14.3103	13.496	13.7386	13.0234	13.7319	13.9412	13.9442	13.893	14.1533	14.1904	13.6149	13.9386	13.9094	14.4585	13.9653	13.9703	13.9793	14.0851	14.0793	14.1919	13.7737	14.4402	14.1402	14.316
ARPC4	8.06513	8.0908	7.96746	8.12547	9.67552	7.86899	7.46507	7.79929	7.60604	8.20579	8.42722	7.63469	7.63377	7.8773	8.13827	7.83176	7.37613	8.51123	7.72788	7.98178	7.35319	8.09791	7.74451	7.88039	8.0808	8.12083	7.89262	7.87757	8.05287	7.98383	7.73712	8.13457	7.71587	7.84444	7.91176	8.15239	7.51607	7.6612	7.65922	7.87278	7.48078	8.05381	7.68394	7.98752	7.8946	7.78147	8.4618	7.79296	8.00574
ARPC5	13.0517	13.1376	13.0845	12.9698	11.5312	12.9173	12.9773	12.3213	12.796	12.9652	13.0043	12.3004	12.1667	12.9669	12.2747	12.6335	13.0759	12.7408	12.6468	13.056	12.3609	13.2241	12.9451	12.9917	12.8184	13.1951	12.2702	12.5114	12.5743	12.3019	12.6128	13.0135	12.7802	12.7658	12.7155	13.2409	13.1926	13.1638	12.6546	12.2804	12.6228	12.2367	12.7456	12.7293	12.7018	12.4961	13.2981	12.9234	13.4052
ARPC5L	10.2179	11.0369	10.4553	10.3698	10.3437	10.9508	10.5083	11.1752	10.6343	11.142	11.1105	10.9406	10.6187	10.0385	10.3693	10.3234	10.6272	10.7133	11.1628	10.4245	10.3031	10.3534	10.5265	10.5941	10.5902	10.2988	10.9111	10.7093	10.0788	10.5239	10.1042	10.5311	10.5885	10.2531	10.5445	10.7227	10.204	10.7362	10.3381	10.3018	10.5688	10.5414	10.2978	10.447	10.2519	10.4552	10.7932	10.5254	10.4845
ARR3	3.01835	2.84562	2.63615	2.8997	2.9139	3.95776	2.54287	3.6589	2.29116	2.53312	2.39749	3.32048	2.84821	2.18847	3.14818	2.19504	2.41378	2.73997	2.50483	1.85292	2.41259	2.06184	3.25388	2.65444	2.64284	2.87029	2.59315	3.06816	2.16874	2.89606	2.38545	2.14486	2.50068	2.42005	2.13242	2.9425	2.51808	2.42122	2.41718	2.43399	2.18417	2.53316	3.00246	2.6924	2.9252	2.25706	2.36511	2.08821	2.07758
ARRB1	9.07626	8.22758	8.79446	9.69447	7.43541	9.20924	8.40835	7.57013	7.89423	8.37358	8.84196	7.96565	8.69544	8.82768	8.32048	8.97756	8.62348	9.17766	7.92301	8.85628	8.08274	8.64457	7.56986	7.88233	8.29243	8.6848	7.8345	7.81675	9.43541	8.09378	8.72239	8.18803	8.31161	8.48627	8.21909	8.98156	9.67161	8.17313	8.44973	7.80546	8.1801	8.28095	8.39052	8.58009	9.10157	8.24527	8.62608	8.43205	9.44634
ARRB2	11.0011	10.9529	11.5417	11.2358	11.0259	11.5398	10.9127	10.6825	10.948	11.177	11.1109	10.2545	10.6188	10.9615	10.8131	11.4997	10.7483	11.5336	10.985	11.3121	10.7423	12.0045	10.6584	10.7045	10.3508	11.9944	10.4974	10.8828	10.5837	10.8034	10.7023	10.9742	10.9148	11.0711	11.1887	10.9612	10.9232	11.2903	11.2441	10.4821	10.7332	11.0433	11.1416	11.1206	10.9897	10.649	11.9691	11.0524	10.9477
ARRDC1	9.8237	9.80209	9.92535	9.93507	10.0794	10.2454	9.86027	9.71475	9.83891	10.0037	9.97151	9.51182	10.1794	9.74326	9.64366	10.0748	9.57507	10.1352	10.1521	9.92125	10.0231	9.88186	9.71003	9.20124	9.47039	9.82447	9.55095	9.98379	9.91397	9.42679	10.0261	9.69851	9.62908	10.0485	10.0099	10.1067	9.7948	9.96982	10.0488	9.8406	9.7661	9.94209	9.77839	9.7783	9.67818	9.8228	10.1009	9.90745	9.77613
ARRDC2	10.1645	10.8666	10.292	11.8116	10.4285	10.554	10.2927	10.6182	10.0894	10.85	9.82482	10.0194	9.85348	10.4598	9.98936	10.71	10.1709	10.4319	10.649	9.99463	10.1924	9.93982	10.0897	10.1121	10.0171	10.725	9.77553	10.1579	10.9718	10.2391	10.3862	10.2109	10.2903	10.7994	10.0964	10.2692	10.5605	10.7527	10.0889	9.69211	9.65752	10.1485	10.0832	9.85175	10.2079	10.0679	10.5011	11.0953	10.3305
ARRDC3	10.3096	10.5708	10.3266	10.3242	9.06541	10.73	10.4324	10.8051	9.88319	10.0889	11.1296	11.319	10.9359	11.3477	10.779	10.2375	10.8831	10.4127	9.58692	9.86608	9.75724	10.2442	10.4459	10.5341	9.92983	9.64938	10.2308	10.4274	10.4284	10.1393	10.2067	10.2489	9.86318	10.2474	9.83453	9.62364	10.5175	10.76	10.1978	10.7473	10.3233	10.2533	9.71854	10.5115	10.4929	10.3476	10.0574	10.4714	10.1268
ARRDC4	10.7205	10.4584	10.745	10.9444	8.78184	10.8025	10.2038	9.39668	9.50063	10.1365	10.8174	10.1772	10.061	10.9556	10.2637	10.2435	10.7582	11.281	8.52375	10.362	10.099	11.0525	9.84524	11.2984	10.1366	11.1343	9.96348	9.70392	10.3762	9.90757	9.96676	9.77524	10.6603	10.9202	10.4248	10.5222	10.8803	10.1138	9.81371	9.9569	10.1193	9.6557	10.5511	10.7259	10.9646	10.2143	10.3039	10.5017	10.5101
ARSB	5.68746	6.76632	6.1281	5.89575	6.546	6.18242	6.24348	5.24043	6.03743	5.28105	6.99051	5.61709	6.19042	6.0619	6.03777	6.55805	6.64979	6.39527	6.46143	5.85671	5.60009	7.08686	5.83992	6.0549	6.22007	6.70415	6.38744	5.86991	5.47415	5.90501	5.28777	6.28865	6.25423	5.83572	5.97431	6.07196	6.05618	6.33461	6.04231	5.86379	5.40669	6.27477	6.04428	6.27424	5.62681	5.21687	7.03339	5.91885	5.90593
ARSD	6.9524	6.65041	6.92549	6.24283	5.78787	7.01176	7.4551	6.71366	7.25969	6.49543	6.19729	6.30695	7.0693	6.30489	6.91882	6.57878	6.06622	7.08536	7.57737	6.24965	7.12301	6.08469	5.72861	6.35824	6.75623	6.14245	6.29207	5.63301	6.53939	6.25391	6.42583	7.08489	6.47066	6.03737	7.28246	6.94139	6.14709	5.77348	7.03078	6.93351	6.68588	7.80564	7.00778	6.91831	6.49528	6.80711	5.33246	6.90846	7.3994
ARSE	6.8979	7.40499	6.73327	5.66155	5.83165	7.29182	7.61537	3.37349	6.19679	5.88915	7.40266	5.27876	4.81003	6.9129	6.33696	7.22622	5.70308	7.31115	6.8199	6.37009	5.69537	4.27559	6.1166	6.46282	4.70535	6.84815	4.90871	6.28216	6.27227	5.52581	6.66813	5.88017	6.10027	7.08991	5.89642	6.77773	6.17423	5.54196	6.36619	4.5247	5.55522	4.16569	6.45119	7.3905	7.04034	5.01239	6.78591	6.38471	7.66107
ARSF	3.28938	5.55894	3.49302	2.18266	3.61371	3.5895	1.8655	3.07155	3.71361	3.31653	3.07631	3.50516	2.07638	3.56447	4.23259	2.49029	2.92586	3.83272	4.14349	3.77217	2.64242	1.90654	3.6298	3.10435	3.1468	3.09028	4.08204	4.13163	3.12955	3.6883	3.80859	3.19053	3.6276	2.4548	4.01909	1.94049	2.89546	3.06701	3.06298	3.07977	2.37567	3.17856	4.24977	3.36891	1.97523	3.24666	3.17503	1.91416	2.76812
ARSG	5.95646	5.83393	6.12189	6.23649	5.05053	6.01623	5.81316	6.25253	6.27693	5.48649	5.95635	6.60801	5.57987	6.21812	5.5926	6.02478	6.60441	6.09596	6.75042	6.26511	6.3686	6.00698	6.23364	6.18662	6.24154	6.04959	6.48359	6.19382	5.75202	6.60588	6.28257	6.26371	6.29735	6.29686	6.28792	6.19168	5.93988	6.32519	5.83662	6.01853	5.6513	6.67726	5.84365	5.88432	6.11926	5.91494	5.93895	6.01448	5.93244
ARSI	7.5797	8.20271	6.84979	7.96836	7.64933	6.90809	7.00723	6.96949	6.54858	6.74387	8.64275	6.56643	7.24434	7.74018	7.54028	7.86205	7.26388	7.38905	6.71738	7.10139	6.34435	6.56668	7.16649	6.51911	7.86469	6.88881	6.67748	7.66593	7.78252	6.32297	7.26787	7.35579	7.28315	7.46399	6.68518	7.67729	7.68834	6.72119	8.05382	6.23706	6.8982	6.72774	6.92072	7.09555	7.85326	6.7286	6.85047	7.37066	8.04302
ARSK	5.92481	6.20947	5.35072	5.30785	4.85034	5.44235	5.80093	6.08388	5.62669	5.26539	5.53828	5.76999	5.65827	6.2246	5.95669	6.5083	5.34721	5.51603	5.53001	5.59914	5.75108	5.5548	5.77953	5.82807	5.78694	5.79843	5.87086	5.49187	6.07732	5.925	6.05133	5.77751	5.6558	5.56717	4.74958	4.98709	5.54733	5.65065	6.05522	5.68268	5.48049	5.12626	5.55093	5.43268	5.91286	5.95658	5.16606	5.97817	6.14135
ART1	2.97803	2.01817	1.97709	2.1537	2.66352	2.93091	2.11531	2.15777	2.11831	2.24917	2.51614	1.74826	2.00679	2.1937	2.03188	2.88105	2.32801	3.26759	2.17139	2.1027	2.59282	1.93851	1.90488	2.1125	1.84466	1.86497	3.47404	2.5392	2.351	2.02331	2.21761	1.98502	2.05301	2.62359	1.98696	5.6176	2.05556	2.28906	2.42457	1.59256	1.90456	2.52351	1.86512	2.47947	2.09515	2.26758	2.296	2.18362	2.16099
ART4	6.45109	6.7288	6.04214	7.4759	6.29113	5.11696	5.79811	5.43397	5.86569	5.60976	6.74372	6.26	4.94095	7.91454	5.87304	6.91498	6.63151	6.47834	3.06389	6.04322	5.56918	4.81884	7.19447	7.53036	5.82509	5.77424	5.77908	7.24723	7.71766	7.47871	7.19901	7.07283	5.11177	6.97704	5.65453	6.85076	8.08094	6.77962	6.8292	5.97255	6.05515	4.79629	6.39292	5.56771	7.26539	6.60273	5.96105	7.12625	6.91541
ART5	5.03067	5.83031	5.35743	4.66699	5.54765	5.62597	4.15743	5.2228	6.09524	5.69871	4.80708	5.16348	5.34508	5.88359	5.09506	5.92246	4.89692	6.10155	4.22383	5.36983	5.98897	4.92683	3.52811	5.54958	3.397	5.06183	5.04667	4.01976	5.32473	4.48549	4.31534	5.05123	6.17238	4.48995	5.21359	5.89978	5.29637	4.6931	4.69022	4.70223	6.33753	3.52374	5.57475	5.48922	5.20185	6.61077	5.75058	5.44772	6.21691
ARV1	10.3822	10.163	10.1785	10.0055	8.32202	10.0602	10.1326	9.13345	10.3101	9.81415	10.0553	9.82925	10.1347	10.4944	10.0981	9.98129	10.2529	10.3239	9.73691	10.0667	10.0378	10.0246	9.81565	10.2734	9.58434	9.88748	10.0232	9.93021	10.1997	9.55631	10.263	9.77288	10.3877	10.5127	10.0661	10.07	9.37622	9.6409	10.2237	10.3442	10.3859	10.266	9.88829	10.2823	10.3369	10.2532	9.57475	9.78346	10.2866
ARVCF	9.98916	8.72682	9.56538	9.9846	11.4283	9.98471	10.2841	9.06821	8.75976	9.28617	10.4953	10.1817	9.89627	10.6458	9.92888	8.56938	9.64285	10.0102	8.25352	9.70579	9.49347	9.17688	9.57193	10.4176	9.55561	9.28436	9.61701	9.8788	11.1449	10.2505	9.58716	9.47572	9.29938	9.51131	9.45891	9.53873	9.64285	9.16458	9.74997	10.1825	8.95449	9.47607	10.044	9.80992	10.1403	10.4188	8.68878	9.28943	9.70722
ARX	4.97545	4.34329	5.6814	4.83609	5.16249	5.09221	5.36296	6.26791	5.37335	4.83296	5.10316	6.84682	6.73736	4.90869	5.77735	4.33503	4.78001	5.26051	5.62466	6.9062	6.89034	6.20191	5.63329	4.88414	5.30612	4.84581	5.62924	5.7511	6.16247	5.02318	5.74898	4.78002	5.7091	6.3385	6.66968	6.38564	5.88757	5.22838	6.12198	6.52016	6.44703	6.04828	5.88804	5.62209	5.83531	5.8457	5.06004	5.6699	4.35581
AS3MT	3.45105	4.86602	3.75342	3.33025	3.644	4.40837	2.48911	2.92903	4.07489	3.4503	4.90797	4.91424	4.41823	4.63344	3.74715	3.83862	3.88312	3.50998	3.36716	3.83661	3.89553	3.11655	4.0417	2.09057	4.34382	3.26221	4.69508	4.825	3.14711	4.16521	3.31672	3.42997	4.05061	8.83797	4.13071	3.69572	4.62702	3.90996	4.20682	3.72465	4.08958	3.21459	4.17644	4.10562	4.32361	5.79149	3.06002	3.45327	4.51553
ASB1	7.51066	7.92702	7.93568	7.85557	7.18183	7.92947	8.03699	8.3748	8.18728	8.31361	8.4399	8.1725	8.5367	7.61863	7.73327	8.19585	8.39378	8.38464	8.66307	8.04452	8.18534	8.60984	8.12048	7.96782	8.16138	8.28795	7.73823	7.99153	7.85557	7.73597	7.79735	8.25362	8.15479	8.10864	8.33926	8.4197	8.32763	8.55217	7.7691	7.84515	8.09883	8.1289	7.95607	8.1584	7.79487	7.73473	8.63972	7.90352	7.59291
ASB11	1.76625	1.92951	1.74893	1.8864	2.17435	1.80143	1.7986	2.4668	2.32241	1.85255	1.88924	1.80356	1.91797	1.86884	1.72215	1.85199	1.79286	1.77945	1.95416	1.77278	1.7849	1.89462	3.57774	1.85212	1.83266	1.86775	1.83425	1.52755	1.83709	1.70618	1.88055	1.66166	1.96764	1.71806	1.82361	1.85766	1.57137	1.78084	1.77927	2.60237	1.89166	1.76167	1.82505	1.77997	1.79629	2.13225	2.01092	1.84472	1.84117
ASB12	4.23367	3.00841	3.81487	3.29734	6.48083	2.52913	3.49269	3.68854	2.82929	3.37643	3.22406	2.9354	4.48829	2.77813	3.58204	3.2198	3.21721	4.12936	2.73122	4.33512	4.2865	4.13641	3.58202	3.48086	3.09365	3.32778	2.90902	3.2556	4.18217	2.50285	4.07537	3.71016	3.76787	3.42199	3.492	3.73534	3.20828	4.05202	3.04136	4.70022	4.35733	2.51464	4.03781	3.1134	4.36047	2.86212	3.00233	3.07036	3.98851
ASB13	10.3706	9.77186	10.3203	10.4249	8.70146	10.239	9.6706	9.57921	9.32672	9.84861	10.4621	9.76371	9.34877	9.71827	9.9008	10.111	10.2357	9.96092	9.74093	10.4052	9.73854	9.96079	10.3725	10.5316	10.646	10.2035	10.0871	9.78391	9.94563	10.4969	9.95548	10.1258	9.9024	10.2417	10.6928	10.4074	10.0339	9.75503	9.97325	9.76263	9.79504	9.92621	9.89226	10.3292	10.1498	9.90043	9.81458	10.2359	9.88651
ASB16	7.53483	6.54542	8.84598	7.83073	7.67911	8.59111	8.20538	6.82464	6.27433	7.64514	8.42171	7.00031	7.49174	8.33653	7.93769	7.99994	6.99476	8.14101	6.73204	7.04477	6.96769	8.37227	7.16102	7.84342	6.43896	8.66324	7.45165	7.88788	8.63428	6.94018	7.07373	7.40714	7.05176	7.34749	7.14321	7.04367	7.03616	6.76096	8.34192	6.99907	6.63388	7.40647	7.44404	8.51287	8.27842	7.54609	7.54223	7.29353	7.30008
ASB17	1.60805	2.06447	1.81547	1.80572	2.24559	1.76061	1.78366	4.0015	1.73963	1.85762	1.81823	1.68862	1.81724	1.79823	1.7351	1.74889	1.48647	2.01312	1.79006	1.60581	1.72852	6.92422	1.7393	1.767	1.85473	1.85669	2.04908	2.56043	1.8072	1.71157	1.78218	1.69472	1.73648	1.7356	1.68379	1.79942	1.67335	2.74108	1.73348	2.32449	1.94036	1.5921	1.82717	1.8002	1.7876	1.83142	3.91857	1.81872	1.82246
ASB2	8.7854	10.5527	9.26342	8.83511	10.5139	9.22941	9.59632	9.66643	11.1209	10.0974	9.99612	11.0284	10.2909	9.51657	10.6888	7.84336	9.69652	9.18597	8.79798	10.121	10.3718	9.5634	11.0906	8.83506	11.0292	10.4427	10.1841	10.9424	9.85518	10.5378	10.035	10.9336	10.1154	9.89873	9.7075	9.81307	8.84815	9.37995	9.77216	9.80049	9.26425	9.86108	10.1684	9.79835	9.66083	10.4647	9.50205	9.92653	9.28748
ASB4	1.68346	2.44786	2.00198	2.03104	3.38467	1.98433	2.00676	2.04518	2.28808	1.9483	2.09491	2.965	2.11393	2.03767	1.95303	1.98706	2.12749	1.8187	2.01983	1.7615	2.89768	2.25676	1.80163	1.93908	1.97521	3.7042	1.95352	1.87902	2.04499	1.93743	2.00754	2.11334	1.96015	1.96103	1.90203	2.02295	1.97952	1.71191	1.70995	1.71811	2.17828	1.6644	1.9373	2.04108	2.00676	2.08194	2.06839	2.04772	2.04635
ASB5	4.15482	6.49293	5.04832	2.30219	5.1229	3.75626	3.76683	6.06378	6.69959	3.95149	4.52573	7.04154	6.68952	5.11296	6.93411	1.63716	3.86819	4.18426	2.89601	5.69874	6.18828	5.32117	7.15397	1.04808	6.76756	5.86997	4.42169	6.28663	6.52922	5.75665	5.04074	6.39077	6.03914	5.15675	5.938	5.42658	4.28204	4.63848	5.63314	4.44911	4.78301	4.47381	6.33519	4.80344	3.43835	6.02199	3.13252	5.63506	4.74279
ASB6	7.73121	7.59282	7.45564	8.1455	8.84317	7.78599	7.8933	8.1321	7.37657	8.13467	7.99444	7.98183	7.51357	7.78717	7.66134	7.91865	7.98711	7.60833	7.94768	7.52239	7.66448	7.35162	7.61978	7.85126	7.95074	7.38462	8.50172	7.83722	7.77588	8.37523	7.25336	8.12947	7.76235	7.3189	7.2975	7.93836	7.77957	7.63731	7.63498	7.64467	7.40764	7.66866	7.7056	7.44645	7.65346	7.29342	7.22144	7.49518	7.83078
ASB7	6.10682	6.24986	6.26174	5.62101	4.42215	5.59054	6.03218	6.27894	6.65179	6.42037	6.43239	6.52164	6.51514	5.73166	5.89797	6.35099	6.66958	6.47687	6.73237	6.26869	6.35805	6.36263	6.32466	7.05854	6.06198	5.97556	6.08988	5.65148	5.74642	6.35939	5.96961	6.09394	6.59423	5.65487	6.40693	6.74943	6.78399	6.88265	6.08417	6.3508	6.80486	5.63432	6.15985	5.97097	5.87088	6.26283	6.84844	6.27339	6.56782
ASB8	7.50567	7.5107	7.71049	7.95848	7.36327	7.51713	7.2926	7.05944	7.6662	7.315	7.44765	7.05473	7.11845	7.6233	8.04923	8.02105	8.00707	7.82563	7.23486	7.64172	7.51553	7.69421	7.65198	7.42784	7.66374	7.59265	7.60811	7.66344	8.04302	8.16253	7.68552	8.17013	7.97297	7.58706	7.42235	7.77536	8.10367	7.36374	7.40999	7.63087	7.26153	7.46716	7.62453	7.63227	7.71704	7.59385	7.5904	7.61283	7.89694
ASB9	8.46638	7.80745	7.94295	8.42673	7.942	7.60367	7.92813	7.3912	7.35076	8.1773	7.66369	7.63362	8.07845	8.4532	7.93924	8.31187	8.42033	8.16081	7.72265	7.98529	7.9266	7.31631	7.92567	7.86931	7.61927	8.53913	7.55126	7.77643	8.26159	7.8933	8.25492	7.2539	7.51919	7.91352	7.83995	7.89732	8.54108	7.34165	8.026	8.24606	7.69007	7.54669	7.74298	8.22623	8.22348	8.03081	7.61838	7.46679	8.31833
ASCC1	7.88558	8.8761	8.452	8.30345	8.68535	8.21448	8.38338	8.62001	8.54097	8.50061	8.64711	8.43402	8.30752	8.33741	8.34207	8.82863	8.23962	8.68284	8.14825	8.42655	8.24243	8.63729	8.80248	8.13738	8.49728	8.20474	8.34327	8.4945	8.27177	8.33989	8.60779	8.51108	8.23056	8.51743	8.5226	8.67869	8.27902	8.06926	8.75825	8.10775	8.0968	8.46969	7.98582	8.17407	8.26403	8.36481	8.62557	8.75952	8.61157
ASCC2	8.74622	9.32695	9.11904	8.81992	8.67305	8.9275	8.78758	8.81255	9.24375	9.28873	9.25419	8.47644	8.6067	8.60466	8.93726	8.98855	8.85072	8.85059	8.99195	8.8437	8.95055	8.88974	8.93115	8.15568	9.15646	8.88173	8.86838	9.00863	8.50344	9.04551	9.17612	9.36528	9.15831	8.91615	8.7759	8.81663	8.70784	9.00284	8.96141	9.03398	9.02276	9.03822	9.01769	8.96052	8.82072	8.34549	9.36188	9.12029	8.88903
ASCC3	8.02059	8.55947	8.09744	7.71454	7.93816	8.38381	8.34764	8.5988	8.31621	8.40666	8.72406	8.43121	8.40584	7.66552	7.46445	6.2867	8.65943	7.45944	8.46922	8.12381	8.45608	7.94444	8.57074	7.65042	8.78905	8.63667	8.11256	8.46426	7.44966	8.34537	7.72922	8.22896	8.10111	8.58217	8.29807	8.78248	8.05386	7.91108	8.79089	8.0414	8.19358	7.68124	8.20205	7.95285	7.81107	8.84792	8.32734	8.63508	8.19149
ASCL1	2.83012	3.68911	4.04012	2.63503	3.48303	3.80713	3.33973	3.37614	3.56314	3.22499	2.40495	4.98881	2.64602	5.34611	4.2645	1.95048	3.37062	2.59488	4.77649	3.53562	3.83048	3.56099	3.57503	4.06288	3.15215	3.14498	3.60957	3.9547	5.18023	4.06436	4.93247	2.40128	4.00802	3.2862	3.92497	3.20261	3.81249	3.39905	4.4136	3.34819	3.93152	2.6935	3.72094	3.00936	2.76376	5.66485	2.40096	3.09467	2.82225
ASCL2	7.73184	6.94811	7.87987	7.82443	9.23111	7.79199	7.60289	7.15622	7.49879	7.12757	6.93011	7.63305	7.84623	7.35169	7.3925	8.43521	7.33023	8.09026	7.40902	8.37144	8.16268	8.17702	7.30366	7.19027	7.04901	8.1592	7.73307	7.518	7.90505	7.35955	7.61513	7.18409	7.69505	7.20698	7.9146	8.5004	7.65378	6.847	7.81767	7.99087	7.88979	7.86429	8.18481	7.95152	8.07145	7.74561	10.5232	7.96436	7.81587
ASCL3	2.24158	2.12601	1.81916	2.03608	2.58352	1.96699	2.94772	3.57383	2.05457	2.36265	2.02167	4.45575	2.09384	2.1011	1.8633	2.00208	1.9464	2.16378	2.10259	2.64275	4.33031	3.15949	3.3547	1.93911	1.96096	2.24752	2.7467	3.52423	2.11522	2.7817	1.8622	1.78595	2.6617	1.84143	2.82882	3.0192	1.60376	2.03806	2.03374	4.27647	3.90081	2.48076	1.95318	2.8651	1.96967	2.1356	2.13669	2.5601	1.97077
ASF1A	7.07091	6.64286	6.47092	6.58403	4.60095	6.91735	6.35008	5.75808	6.20113	5.47174	6.22554	4.89313	6.17215	7.217	6.71729	7.22146	6.88408	5.99504	5.49515	6.36803	6.23762	5.4644	5.82245	6.31536	5.90692	5.84924	5.81921	6.10437	7.22288	6.88226	6.47234	6.66444	6.05959	5.98222	6.02472	5.76146	7.26962	6.17593	6.30959	5.83641	6.38581	6.06264	6.43984	6.59874	6.27283	6.84783	6.3309	6.45491	7.08995
ASF1B	6.13434	6.41593	7.19142	5.99032	6.16664	6.57702	6.62976	5.72117	6.3065	6.16264	6.45244	5.77031	6.10382	6.20452	6.12231	7.83075	6.1133	7.03547	6.89944	6.05022	6.07234	6.67713	6.05741	5.97402	5.58172	7.01016	6.3438	6.31696	5.38639	5.85252	5.84882	6.66368	6.07317	6.67108	6.42094	6.02519	5.48118	6.69743	6.74597	5.72503	6.5362	6.8889	6.31406	7.07961	6.06176	5.97341	7.68565	6.18593	5.90937
ASGR1	9.7094	10.369	10.3496	9.54269	9.74687	10.0335	9.92624	9.24093	9.7233	9.40538	9.96613	9.21902	9.58808	10.0988	9.18697	10.1097	9.69361	10.012	9.634	9.77611	9.28217	10.3267	8.96383	10.4375	9.46834	11.164	9.10465	9.05047	9.83746	9.53571	9.5448	9.51423	9.93248	9.88392	9.72393	9.31288	10.0528	10.322	8.99289	9.19127	9.33728	9.62248	9.59005	9.86952	10.0829	9.2022	11.0874	9.7561	9.77134
ASGR2	6.23176	8.13367	7.68608	7.00912	8.18277	8.03015	6.91198	7.38588	7.26221	7.46114	7.8037	7.62999	6.71957	7.58863	7.18303	6.62087	6.85416	7.29365	8.043	7.36536	7.01911	7.12368	6.87498	7.98434	7.12588	8.09772	7.60565	7.00431	6.31503	8.28157	6.40841	7.13937	7.86804	6.98833	7.21823	6.58681	7.36547	7.09717	7.8978	7.10989	8.06597	7.81828	6.94609	7.51885	7.63114	6.88471	9.34522	7.77863	7.23892
ASH2L	10.4036	10.0617	10.1792	10.5901	10.7048	10.2999	10.1714	9.77123	10.0718	10.0316	10.0821	9.90292	9.88446	10.0736	10.1294	10.4286	10.3289	10.3372	10.0303	10.293	10.055	10.2317	10.1076	10.5377	10.2585	10.1406	10.0317	9.96254	10.2095	10.3323	10.2607	10.3497	10.2105	10.1329	10.3378	10.5289	10.4709	9.94019	10.4248	10.3492	10.2967	10.1561	10.2295	10.1661	10.264	9.94874	10.3408	10.2141	10.3338
ASIP	3.20341	1.88056	3.83476	3.82559	3.25289	3.04134	3.58721	1.62001	1.87449	2.882	2.22371	2.87349	2.38956	3.63482	3.2709	3.20191	2.41963	3.48125	2.19926	2.41251	3.47331	2.25653	3.26649	3.2364	1.47497	3.27051	3.50764	3.38715	2.4119	3.11622	2.60667	3.67619	3.06367	3.35036	2.88054	2.29718	3.17411	3.73194	2.89329	1.31559	2.27718	2.84959	3.12865	3.56676	3.81877	2.84457	3.27772	2.10852	3.32627
ASL	10.0855	10.1832	10.0628	9.82822	9.72862	10.2804	10.2306	10.3733	10.0244	10.5715	10.2832	10.2452	10.4766	9.90552	9.99342	10.2684	9.7939	10.2783	11.4587	10.0936	10.4415	10.2134	10.0706	10.2764	9.79371	10.219	9.56852	10.2177	10.3409	9.60983	10.4136	9.95235	10.2182	10.8496	10.0912	10.3458	9.66224	10.0105	10.6569	11.2479	10.5031	10.2796	9.90388	10.0278	10.1709	9.77044	10.1531	10.068	9.80339
ASMT	4.56086	5.03007	5.78633	5.19881	6.54985	4.88482	4.92839	6.22559	5.78633	5.21029	4.69964	5.76283	4.84518	5.84342	4.42347	4.59383	5.06572	4.91634	5.2452	5.65684	4.40608	4.37895	5.10346	5.1077	5.34836	4.6121	5.96355	5.26407	5.90797	4.09325	5.35978	5.257	4.85577	5.58319	4.41581	4.80141	5.34233	6.3687	4.89743	4.90711	5.56455	5.73702	5.7174	4.92971	5.42081	6.22115	5.41334	4.76429	5.6773
ASMTL	10.6868	10.8874	10.4962	10.7532	9.89616	10.3518	10.2561	10.4677	10.8876	10.6047	10.491	10.312	10.8912	10.7771	10.609	10.6073	11.0052	10.3926	10.7773	10.4244	10.8237	10.5696	10.7455	10.6677	11.1319	10.7625	10.7006	10.6958	10.7076	10.9666	10.9559	10.7362	10.8254	10.3946	10.732	11.0823	11.0061	10.6461	10.9137	10.1317	10.5609	10.2666	10.3584	10.5055	10.4105	10.9501	10.7935	10.2556	10.4387
ASNA1	9.81941	9.45668	9.81807	9.56771	9.55726	10.0227	9.53157	9.42735	9.37031	9.87494	9.855	9.51619	9.82609	9.46625	9.63881	10.0527	9.3813	10.1147	9.69098	9.64795	9.55246	9.9249	9.48223	9.64912	9.75675	9.23714	9.77746	9.54011	9.61542	9.36453	9.41066	9.65156	9.61489	9.63881	9.71398	9.79533	9.36045	9.38322	9.65643	10.0205	9.80338	9.73004	9.48835	9.91112	9.69506	9.03085	9.9416	9.27976	9.52815
ASNS	11.3844	11.7925	11.1136	11.4163	11.2064	11.3526	11.966	11.7153	12.3228	11.8345	11.708	12.1135	11.5421	11.4132	11.508	11.8822	11.6969	11.2619	12.1484	11.3083	11.8418	11.2243	12.018	11.8807	12.1193	11.8521	12.3316	12.0204	11.1436	11.8929	11.6648	11.4603	11.9454	11.5881	11.464	11.2005	11.4612	11.5876	11.5737	11.0859	11.6401	12.0919	11.7094	11.4045	11.5191	12.08	11.3407	11.6643	11.3825
ASNSD1	11.1875	11.2558	10.9359	11.4123	10.1836	11.0806	11.015	11.4193	11.3819	11.4462	10.8832	11.0995	10.9505	11.1014	11.0437	11.2345	11.5922	10.7142	11.425	11.1885	10.9429	10.9484	11.2193	11.2895	11.1404	10.8575	11.286	10.9229	11.0167	11.0327	11.2859	11.2102	11.2675	10.8148	11.0634	10.9603	11.6656	11.1352	11.3497	11.1196	11.2722	11.228	11.2291	10.7819	11.2282	11.3102	11.0193	11.1	11.2978
ASPA	8.75367	9.07812	7.97619	8.10932	7.86415	8.0072	7.57605	7.07972	8.84518	8.05186	8.73323	7.98035	8.14474	9.19022	8.88413	7.99434	8.57565	8.00301	6.93852	8.29994	7.80082	7.54815	8.82714	8.99174	8.73476	8.53688	9.30986	8.68103	8.96809	8.78555	8.91174	8.92687	7.97177	8.76903	8.25845	8.34292	9.32192	8.55097	8.94938	6.78354	7.96655	8.58092	8.9374	8.62695	8.76651	9.44753	8.62846	8.97616	8.97238
ASPH	8.78145	9.34262	8.7267	8.60356	7.58232	8.74483	8.52392	8.76801	8.80672	8.2089	8.82252	9.23779	8.88053	7.85939	7.43195	7.89086	8.83765	8.11014	8.54231	8.7353	8.78713	8.56496	8.93751	9.08433	9.2337	8.65793	8.7939	8.26456	7.08557	8.86538	8.72903	9.07347	8.50838	9.10946	8.77487	9.60916	8.76833	9.00414	8.7038	8.84108	9.765	8.06221	8.65225	8.14478	8.09765	8.44442	8.68293	9.29606	9.1711
ASPHD2	5.99506	6.8297	6.09848	6.1382	5.40008	6.59491	6.98431	7.60131	6.88124	6.83016	6.50956	7.15544	5.95504	5.89857	6.04093	6.11297	7.56188	6.17317	7.08491	6.57031	6.25082	6.94475	7.18725	6.3865	6.43179	6.82444	7.48719	7.06462	5.89267	6.61574	5.79475	6.22602	7.29963	6.18211	6.50655	5.84092	6.26791	6.72647	6.7177	6.35967	6.05165	7.10313	6.48575	6.61724	6.4182	6.85945	7.84771	6.17556	6.61628
ASPM	6.6897	6.98365	7.55635	6.28644	6.76477	7.11799	7.29419	6.27967	7.08406	6.17239	5.58841	6.49511	6.64997	6.84428	6.73927	8.57087	7.20762	6.5514	7.40836	6.84426	6.01392	7.93218	6.55843	7.41524	5.7571	8.46944	6.86384	7.21478	5.48621	6.18268	5.93175	6.92702	6.82169	6.98384	7.04264	4.95179	6.37976	7.81859	6.1431	6.44237	6.96234	7.98425	7.24564	7.87284	5.89335	6.22753	8.9344	7.05482	6.59138
ASPN	10.2132	12.3408	9.9218	10.8482	9.38887	10.2268	11.757	10.5685	11.8068	11.5654	10.4557	10.9133	10.9919	11.2666	11.8018	11.0721	11.748	10.2718	9.82138	11.2008	11.4214	12.1967	11.5637	11.5039	12.2055	11.2262	10.59	11.886	11.1383	11.2407	10.8014	12.01	11.5363	12.4912	11.4052	10.3199	11.2436	10.1294	10.125	10.1432	10.6673	11.4868	10.9198	10.5423	10.8149	10.9846	10.1925	10.9872	11.8121
ASPRV1	9.567	9.61253	9.18664	9.98008	9.31679	9.18219	9.33457	8.53425	9.17267	9.23302	9.2187	9.01838	9.0405	9.84632	9.76823	9.14378	9.2455	8.80434	9.17859	9.19622	9.564	8.627	9.3951	9.6052	9.64806	9.39899	9.4878	9.38854	9.82653	9.7823	9.69902	9.20833	9.73235	9.57807	8.64293	9.29108	9.71197	9.48203	9.29726	7.89833	9.50681	8.80412	9.16701	9.47055	9.20103	9.60674	9.10727	9.48939	9.21637
ASPSCR1	7.92585	7.782	7.77459	7.83126	8.63999	8.15469	8.15035	7.24672	7.62694	7.93814	8.12419	7.41921	7.71056	7.82074	7.23396	7.95747	7.77356	7.82942	7.87977	7.85297	7.57686	7.53304	7.65639	7.24296	7.50285	7.78549	7.53715	8.00717	7.72187	7.3352	8.3828	7.84769	7.64719	7.83691	7.19754	7.66967	7.70793	7.76706	7.56368	8.03887	7.571	7.55546	7.51445	7.51966	7.50073	8.0783	8.00652	7.81548	7.98877
ASRGL1	11.2748	11.0312	11.152	11.6722	11.4549	11.222	10.737	10.6546	10.7583	11.8874	11.5228	11.373	10.1891	10.4781	10.1201	10.7063	10.8228	10.8831	12.2312	10.7363	10.3565	9.99466	10.8188	11.5652	10.5483	11.2025	10.3396	10.776	11.0374	10.8248	11.0467	11.284	10.6266	11.1684	10.813	11.7639	11.1609	10.9703	10.9065	9.27554	9.97852	10.525	10.6021	10.323	10.9202	10.8644	11.236	11.0534	11.1486
ASS1	8.93369	9.37993	9.35954	9.59178	9.29394	9.28549	9.76505	9.5058	9.75553	9.36446	9.54135	9.87214	9.96097	8.79597	9.59626	9.41063	9.05157	9.49628	10.4393	9.3653	9.6811	9.76862	9.65201	9.64849	10.0762	9.03576	10.1584	9.75696	9.22707	9.35582	9.23987	9.1726	9.52472	9.05774	10.0329	9.77446	8.61877	9.17475	9.58355	9.6791	10.1213	10.0774	9.38681	9.55918	9.27083	9.25059	9.33712	9.67973	9.44946
ASTE1	7.86651	7.51885	7.40435	8.07006	5.87207	7.52376	7.28212	6.85862	8.07516	7.81236	6.91357	6.68043	6.93609	6.86003	7.70803	7.80193	8.24511	7.26638	8.29781	7.88792	7.92106	7.77704	8.06837	7.80868	7.99349	7.84237	7.6865	7.7076	7.59783	8.53733	7.50803	8.05504	7.75335	7.76157	7.99017	8.23606	8.12345	7.52662	8.17882	7.19843	7.68006	7.56099	7.73148	7.64755	7.70293	7.6399	7.53735	7.71766	7.76709
ASTN1	4.60777	5.0769	3.97881	4.28807	3.79869	2.6961	4.8572	5.29914	5.50003	3.61186	4.63035	4.05622	5.29042	3.42604	5.71394	1.80095	3.3479	2.23216	3.92432	3.91799	3.4597	3.55856	5.09011	6.74572	5.82799	4.43504	6.77195	3.63535	1.80359	6.78401	4.66034	4.49052	5.61889	5.81703	3.77636	2.66141	3.57885	4.34498	4.58908	4.04575	5.08612	4.30547	2.97763	5.57803	5.43329	4.47709	3.85534	4.16783	2.95862
ASTN2	10.2235	8.86556	10.6333	9.92189	10.3247	10.344	9.87863	9.55737	9.52773	10.0337	10.3629	10.0286	9.34651	10.7164	10.2073	10.2825	9.97315	10.4205	9.41627	9.99842	9.57713	10.0056	9.87818	10.4946	10.1762	10.757	9.90555	10.1451	10.2625	10.2735	10.3538	10.5559	9.80583	10.083	9.66296	10.0446	9.91327	9.73222	10.0556	11.1616	9.51896	9.90298	10.176	10.1799	10.565	10.0116	11.0668	9.69532	10.4082
ASXL2	11.0171	10.926	11.0195	11.3265	10.35	11.1476	10.6345	10.6149	10.9182	10.8167	10.6246	10.8335	10.6041	10.6035	10.6407	10.6014	11.1033	10.6527	10.762	11.0978	11.1491	11.0253	11.0965	11.2048	10.9348	10.9319	10.8448	10.9428	10.5742	11.3582	10.6377	10.8608	11.0107	10.9333	11.2074	11.2996	10.9149	10.799	11.4763	11.0459	11.1409	11.0918	11.1598	10.9762	10.886	10.8623	11.0763	10.6863	10.7556
ASXL3	5.25638	6.15979	5.19849	5.24372	4.81178	4.97132	4.79375	5.69322	6.18725	4.80625	5.66956	5.31133	6.28266	6.14514	5.87135	5.05266	5.52294	4.60782	6.69674	5.61019	6.33486	5.0581	5.58166	5.65399	5.53396	5.118	4.81256	5.61765	6.5501	6.24286	6.17721	5.75471	6.32339	6.20225	5.30729	6.16164	6.57816	6.25966	4.69704	5.37387	6.18501	6.40743	6.90648	5.9933	5.92719	6.19359	4.73238	5.8522	4.95078
ATAD1	10.9353	10.7325	11.2533	10.7305	9.58193	11.1005	10.939	10.6808	10.457	10.449	10.4349	11.2459	10.7097	10.831	10.6321	10.6507	11.112	10.4529	10.1244	10.7813	10.6736	10.5737	10.8295	11.1295	10.8435	10.4709	10.7841	10.4719	10.7113	10.6126	10.469	10.7158	10.7145	10.8418	10.7646	10.6629	11.1591	10.6022	10.5326	10.5094	11.2038	10.5079	10.7948	10.6397	10.7962	10.4117	10.5304	10.6126	10.9314
ATAD5	4.48037	4.17342	5.04618	4.73304	4.2256	4.27433	4.72321	3.15192	5.23749	4.08657	3.62696	3.3292	3.86487	3.85293	3.83556	4.80255	4.19165	4.57988	4.76646	4.0127	3.88947	4.90502	4.4053	4.51416	4.32602	5.07159	3.20166	3.66009	4.60178	3.94544	4.21332	3.76386	3.95107	4.138	4.80407	3.9167	4.10623	4.08929	4.08408	4.10579	4.43303	4.46353	4.82502	3.89188	3.76405	4.27547	5.62585	4.52722	4.31557
ATCAY	2.71945	2.04039	2.03958	1.99771	3.66466	3.36064	1.95443	2.00737	1.98624	2.21606	2.65271	3.95555	2.9326	2.02368	1.89616	1.97748	1.64903	1.97117	2.02277	2.57524	2.64768	1.92007	1.72775	3.03809	1.7833	3.23519	4.00185	3.73151	1.98422	2.39073	1.97798	1.86184	2.94387	1.90673	1.88509	1.99489	1.94555	1.58307	1.58065	2.40425	1.85852	2.73889	2.67968	2.52609	3.22608	2.06232	2.09081	1.98503	1.98684
ATE1	5.69624	6.13423	5.8597	5.15925	4.96121	5.77361	5.68486	6.51329	5.15418	5.77435	5.64839	6.71349	6.13041	5.9831	5.84823	5.78894	6.41953	6.2126	5.6077	6.00608	5.51672	6.2126	5.70567	6.211	5.89013	5.88577	5.9476	5.50652	5.74547	5.33047	5.45266	5.80307	5.40388	5.49927	5.48164	5.88892	6.35879	6.52981	6.12093	6.26707	5.92133	5.40686	5.28597	5.67918	6.14502	5.67713	6.94266	5.66288	6.31563
ATF2	6.75259	7.17485	6.18611	6.08284	4.95137	6.28363	6.9982	6.61186	6.7882	6.68713	6.59676	6.73052	7.03933	7.22977	6.3334	6.27155	7.23423	6.24514	6.71456	6.4996	6.6379	6.62069	6.66875	6.52984	6.94227	6.63175	6.53232	6.38863	6.64969	6.85408	6.63876	6.72304	6.5201	5.83904	6.38504	7.25206	7.23401	6.61905	6.62215	6.59795	6.95948	5.98429	6.69912	6.09334	6.77727	6.47234	6.69083	7.04422	6.95289
ATF3	6.4647	8.0065	6.83586	7.90572	7.28354	8.93578	7.01921	8.77065	6.47832	9.67993	9.23602	9.49467	7.88371	7.96922	7.84011	8.57803	7.06112	6.82032	8.22977	7.44822	7.83607	8.1464	6.21327	7.16852	6.58985	6.0061	6.47432	6.25864	6.51086	5.81454	6.60238	7.3661	7.31766	5.86509	7.5544	8.34435	5.52332	8.52073	8.5651	9.57584	10.0561	7.34994	7.23635	6.75666	8.3949	6.5274	7.11083	7.49616	6.71222
ATF4	14.6774	15.0593	14.4148	14.7872	14.7842	14.5744	14.9381	15.2309	14.7894	15.509	15.038	14.9295	14.8385	15.1718	14.7286	14.5131	14.6224	14.6634	15.4628	14.9	14.6234	14.4603	15.1361	14.7702	14.8806	15.1092	15.0047	15.2009	14.9612	14.5957	15.1741	14.7121	15.0901	14.7077	14.6145	14.446	14.6492	14.4837	14.7828	14.7418	14.5223	14.7199	14.7712	14.6097	14.7236	15.0337	14.4931	14.9553	14.9059
ATF5	7.68213	8.08633	7.64165	7.50345	9.56813	7.75732	7.99639	7.75795	8.55435	8.34793	8.31158	7.6445	7.26227	8.25797	7.9136	7.90683	8.20627	8.00329	8.65522	7.94101	8.15126	8.05609	8.14624	7.4077	8.89824	8.48617	9.13568	8.12327	7.52492	8.55033	8.07611	8.16366	8.5222	7.77117	7.58011	8.03265	7.85846	8.10078	7.74996	7.65767	7.65407	8.39251	8.04756	8.07643	7.72919	8.11692	9.65663	7.92724	7.81991
ATF6	10.0955	10.2806	10.1417	10.0217	9.53554	10.0372	10.3734	10.9494	10.641	10.4393	10.5147	10.502	10.101	10.2032	9.99348	10.7384	10.5955	10.4412	10.9066	10.2056	10.2602	10.5798	10.4441	10.5168	10.5267	10.3445	10.5475	10.413	9.74382	9.93841	10.0646	10.5185	10.2476	10.416	10.1664	10.3638	10.7469	10.4554	10.4001	10.8588	10.2462	10.376	9.94862	10.1691	9.99868	9.83121	10.7631	10.6184	10.3813
ATF7	4.2017	2.57018	2.5707	3.65427	1.48498	4.41441	2.73965	2.97545	3.50329	3.36633	2.29465	2.80826	2.30538	3.52581	2.71818	2.87254	3.16861	3.90045	4.10312	2.26418	2.80134	3.3093	3.51874	3.81186	2.49913	2.42213	2.63406	2.76742	2.65739	2.78387	3.99624	2.08802	3.23412	2.91886	3.28138	3.4712	3.41971	3.64568	3.51806	3.87793	2.94787	3.18627	3.07604	3.49174	4.56935	2.42416	2.5693	3.49501	3.65205
ATF7IP	8.22978	7.31133	8.27019	8.07465	7.72869	8.19656	7.81226	7.06246	7.88944	8.08162	7.47762	7.56728	7.42778	6.86958	7.07927	7.1005	8.09473	7.32338	7.49414	7.78308	7.83715	7.49202	8.48456	7.97723	8.43962	8.16553	7.45216	7.2811	6.89327	8.19135	7.84785	8.56128	7.68967	7.88177	8.24827	8.49551	8.30553	7.90742	7.5646	7.53024	8.17771	7.84768	8.12481	7.51144	7.37666	7.7696	7.9847	8.18987	8.32396
ATF7IP2	7.76813	8.75488	9.32871	8.66124	7.50998	8.22009	8.90656	9.27627	9.02136	8.76234	8.49253	9.33483	9.19661	8.14328	9.40247	8.45475	8.5308	8.72844	8.71948	8.84999	9.63667	9.0443	9.72602	9.17291	8.53224	9.13534	9.44119	9.77292	8.52608	9.11684	8.60448	8.32793	8.87522	8.59878	9.44372	8.69036	8.57365	9.12764	8.46117	9.39648	8.98845	8.95107	9.31444	8.98137	8.41814	8.69859	8.96944	8.76834	8.11289
ATG10	6.71393	6.73746	6.2822	6.71514	6.42229	6.43133	6.56368	5.39105	5.90195	5.84707	6.74138	6.49889	6.29102	6.39055	6.29378	6.42549	6.66315	6.64882	5.81729	6.3411	6.60668	6.10919	6.68583	5.16339	6.76143	5.87539	6.49846	6.52204	5.92372	6.61583	6.40903	6.02898	6.61201	6.57589	6.15761	6.4035	6.80141	6.76514	5.80427	6.41621	6.7553	6.55249	6.3324	6.59841	6.63612	7.06024	5.89876	5.64926	5.81464
ATG12	10.2357	10.9032	10.3289	9.93105	8.87756	10.0251	10.7078	10.6499	10.3842	10.3917	10.3632	10.8472	10.562	10.629	10.2821	10.2828	11.0477	10.2803	10.6312	10.1122	10.1185	10.5092	10.1474	11.1494	10.1237	10.6888	10.3337	10.3351	10.2174	10.6863	10.2964	10.3695	10.4317	10.4716	10.253	9.62652	10.7392	10.7652	9.74254	10.2647	10.1256	10.2059	10.5495	10.4413	10.3041	10.7697	11.0002	10.5155	10.3586
ATG16L1	9.26877	9.50399	9.37673	9.52793	9.58377	9.47612	9.53829	9.81832	9.39004	10.0351	9.4475	9.44256	9.48189	9.06633	9.13863	9.58257	9.64099	9.4395	9.86813	9.57068	9.53926	9.09188	9.5364	9.40434	9.42346	9.49685	9.25968	9.44609	9.10848	9.62814	9.6073	9.74296	9.40476	9.34494	9.51109	9.7353	9.80066	9.84454	9.62925	9.5018	9.49344	9.23251	9.53717	9.00568	9.3805	9.24296	9.65087	9.39817	9.34612
ATG16L2	12.0775	11.5574	12.0024	12.1485	11.2796	11.6764	11.865	11.0453	11.628	11.4833	11.167	11.3042	11.6477	11.7232	11.2111	11.7463	12.0551	11.3863	11.4549	11.9475	11.6652	11.7826	11.567	11.3062	11.5176	12.4175	11.5574	11.354	11.6303	11.7172	11.6802	11.5242	11.6892	11.3212	11.9331	10.8649	12.0976	12.1611	11.2896	11.4568	11.4296	11.7719	12.0467	11.5501	11.7964	11.8099	11.8962	11.8428	11.8044
ATG2A	8.0683	8.29096	8.09239	8.24391	7.92042	8.0891	8.42558	8.6352	8.51647	8.59465	8.46954	8.21508	8.22231	8.4008	8.097	8.37613	8.36207	8.29158	8.90776	8.30058	8.09199	8.1196	8.31588	8.3738	8.30203	8.41413	8.36977	8.18515	8.13471	8.0424	8.38304	8.56317	8.25301	7.95282	8.31791	8.10643	8.21531	8.74699	8.32314	8.35402	8.03232	8.3195	8.06541	8.20565	7.97947	8.21266	8.44301	8.34708	8.27132
ATG3	10.4034	10.3851	10.583	10.5499	9.36788	10.5851	10.1594	10.1577	10.4765	10.3699	10.4651	10.3516	10.1471	10.7813	10.4746	10.4857	10.5933	10.6011	10.3118	10.5065	10.3108	10.8805	10.3191	10.6736	10.2813	10.5436	10.4923	10.2957	10.6276	10.5487	10.1354	10.1531	10.4815	10.4906	10.3517	10.195	10.709	10.4306	10.1857	10.3407	10.2513	10.5194	10.3811	10.6825	10.6154	10.1756	11.42	10.3556	10.5451
ATG4A	9.30823	9.94855	9.55684	9.74983	8.18523	9.64428	9.74118	9.7004	9.79795	9.86373	10.372	9.51687	9.25096	9.60725	9.23449	9.39991	9.60868	9.80485	9.69387	9.53656	9.43396	9.42682	9.82488	9.52758	9.45423	9.76374	9.47429	10.0733	9.71524	9.56076	9.25847	9.60806	9.57446	9.45945	9.1906	9.37625	9.74244	9.76799	9.48239	9.64338	9.19412	9.5285	9.59033	9.52845	9.71606	9.96304	9.4092	9.37527	9.72258
ATG4B	11.1345	11.0115	10.8889	10.8871	11.0484	10.9349	10.9797	11.2871	10.6728	11.3056	10.6225	11.0661	11.1833	11.1563	11.0276	10.5783	10.7559	10.9511	10.9184	10.9127	10.729	10.2628	10.7438	10.9023	10.7683	10.9213	11.1119	10.8314	11.2069	11.0487	11.0185	10.5697	10.8409	10.6752	10.7867	10.4589	10.6642	10.8086	10.8026	10.8275	10.6896	10.4757	10.7509	10.9199	11.0758	11.3864	10.5229	10.8047	10.8751
ATG4C	7.90917	7.84564	7.50252	7.93329	6.59988	7.68888	7.39525	6.77228	7.55174	6.68471	7.44471	7.35462	7.3711	7.72689	7.84617	7.82362	8.11028	7.63371	6.91297	7.61089	7.41868	7.60183	7.27212	7.99805	7.52625	7.61869	8.06597	7.36435	7.50046	8.16361	7.39594	7.63623	7.55014	7.45066	7.40693	6.8689	8.13873	7.38985	7.38739	7.39763	7.30446	7.70642	7.65825	7.89403	7.61367	7.6352	8.04628	7.3284	7.63462
ATG4D	7.10598	6.98339	7.00659	7.07652	7.58633	7.16293	7.22383	7.00053	6.66819	7.44731	7.04538	6.97513	7.58252	7.03327	6.16336	7.462	6.64428	7.47618	6.54352	7.10849	6.8938	6.78871	6.15756	6.49085	6.22955	7.0112	5.80349	6.05251	7.02264	6.06239	7.07897	6.77926	5.95569	6.687	6.86853	7.28249	7.06496	6.98023	7.30169	7.31923	6.78377	6.44632	6.64039	6.57445	7.1574	6.973	7.06802	6.82549	7.12764
ATG5	8.92916	8.31979	8.58585	8.83357	6.89785	8.29787	8.28057	8.3328	8.54478	8.46555	7.72497	8.86397	8.50727	8.60041	8.39472	8.5692	8.41725	8.34654	8.04109	8.66608	8.763	8.4272	8.36227	9.08214	8.05416	8.04999	7.90365	8.01942	8.69467	8.52327	8.29221	7.82587	8.75046	8.74189	8.76873	8.35009	8.78419	8.71096	8.41636	8.18853	8.24693	8.36939	8.61567	8.53217	8.96051	8.71036	7.74712	8.14878	8.3826
ATG7	8.52628	8.0474	8.73125	8.82201	7.44024	8.75377	8.623	8.10075	8.16083	8.55075	8.56421	8.2429	8.41723	8.12414	8.3107	8.55048	8.45097	8.8767	8.49458	8.45435	8.21868	9.11375	8.49664	8.33503	8.08693	9.03332	8.28034	8.34139	8.38687	8.10891	8.19913	8.42067	8.31253	8.46497	8.57816	8.50499	8.6458	8.82129	8.002	8.62402	8.10053	8.52023	8.5368	8.44362	8.40618	8.22295	9.15361	8.36842	8.23668
ATG9B	3.3264	7.46276	4.16978	2.57372	7.09333	5.16256	4.30141	3.45265	2.32626	3.54085	2.6261	5.47924	3.76772	5.43773	5.32785	2.3463	3.15048	2.52849	5.19348	4.22677	5.20181	4.3154	4.51174	5.92015	2.45537	3.42481	3.16528	3.60338	6.46587	3.29634	5.08379	2.75262	3.97159	2.65825	4.75624	3.2414	2.36999	1.95144	4.61758	5.39292	6.00735	4.11965	4.62399	3.56347	3.98984	4.59161	4.38027	3.60073	2.03048
ATHL1	10.6289	9.9287	10.4053	9.55491	9.58877	10.4175	9.2705	10.0994	10.1991	9.82018	9.02769	8.7413	10.365	10.3352	10.5748	9.30614	10.6938	9.97964	11.118	9.55162	11.0881	9.84587	10.0341	10.4095	10.1455	9.85614	10.8072	10.4223	8.82142	10.9576	11.0048	9.68712	10.0634	10.2849	10.2655	8.32931	10.8574	10.7292	9.54897	10.841	10.7611	11.2983	9.26532	9.52323	10.0704	10.5348	10.296	11.1028	9.99051
ATIC	9.6927	10.4843	10.3872	10.27	9.42634	10.477	10.5299	9.97047	10.3423	10.1741	10.7467	10.0781	10.3012	9.97059	10.5164	10.6361	10.2671	10.611	10.4925	10.4817	10.4036	10.5059	10.4775	10.1603	10.4634	10.5739	10.2806	10.529	9.96021	10.6446	10.2813	10.4401	10.2633	10.685	10.5842	10.4518	9.91763	10.4657	10.229	10.2012	9.97162	10.4092	10.3561	10.2624	10.2965	10.4193	10.9997	10.398	9.92588
ATL3	8.11855	8.73679	8.82935	8.50139	7.04403	8.57027	8.97141	9.07795	8.42776	8.67958	9.06092	9.04052	8.74987	8.76272	8.4175	9.11177	9.03289	8.81144	8.78775	8.28919	8.61389	9.83237	8.70553	9.16517	8.54066	9.04591	8.53836	8.7466	8.27748	8.28492	8.03508	8.63329	8.71785	8.44591	8.47996	8.36857	9.32743	8.96593	8.26612	8.33566	8.10651	8.78211	8.56655	8.72653	8.49507	8.58504	9.66578	8.64851	8.46903
ATM	7.5207	7.48356	7.62797	7.94709	5.64369	7.26618	7.10426	7.41992	7.50427	6.97742	7.00585	6.58514	6.26654	7.33532	7.41097	6.41198	8.41554	6.89429	7.7858	7.61122	7.19549	6.54318	7.66416	7.31805	7.56337	7.72022	7.56599	7.81839	7.13761	9.02353	7.72382	7.2957	7.48382	7.75347	6.95077	7.17225	7.93453	8.42947	7.09131	6.87545	6.78841	7.24655	7.5082	7.53685	7.63462	8.35463	7.65916	7.58734	6.8139
ATMIN	8.96809	8.4491	8.90042	8.85784	6.80849	9.02667	8.87632	8.88626	7.34749	7.98233	8.81123	8.87436	8.70199	9.61606	8.96433	8.55419	9.48095	8.94288	8.06264	8.69628	8.20032	8.14931	8.58071	9.1988	9.2246	8.7728	9.22451	8.9605	9.37112	9.0841	8.48497	8.34446	8.3122	8.36019	8.13472	7.99794	8.97459	8.44845	8.79082	8.10277	8.42024	8.39634	8.27654	8.97121	9.43917	9.35303	8.19608	8.60798	8.87809
ATN1	8.5454	9.16459	8.24918	8.95386	9.74192	9.05034	8.71233	9.12112	8.60212	8.69523	8.78149	8.98575	8.85563	8.73884	8.77396	8.31605	8.57926	9.4581	8.69887	8.59194	8.77135	8.47451	8.4293	8.25375	8.87747	8.5821	9.20091	8.86721	8.80988	8.71825	8.91363	8.39194	8.36288	8.88847	8.45842	9.0821	8.46595	8.66145	8.65977	8.66677	8.69647	8.81616	8.93798	8.59526	8.84648	8.36355	8.03832	8.60858	8.66469
ATOH1	1.95831	2.13573	1.95225	1.88687	3.18552	1.91242	1.88795	1.92094	1.98104	1.91961	1.85124	1.76055	1.9123	1.88303	1.88567	2.01008	1.45705	1.81339	1.94301	1.80382	1.85015	2.03242	1.84767	2.04271	1.9245	1.98313	1.7789	1.69133	1.96953	1.95081	1.94517	1.83852	1.9165	1.91218	1.98716	1.90559	1.67653	2.06391	1.8764	1.88423	2.03656	1.79554	2.09034	1.87307	1.85292	1.96245	2.04139	1.89491	1.88459
ATOH7	2.8092	1.80947	2.66037	2.51004	2.49429	1.95206	3.01381	2.51591	2.74715	2.2498	1.77426	2.61138	3.33967	2.0067	3.39105	2.65733	2.51275	2.23027	2.01387	2.80397	2.97224	2.73485	1.54791	2.66328	1.58413	2.48549	1.65402	2.28813	1.99367	1.95098	2.36123	1.86191	3.31317	2.99285	2.00399	1.95706	1.79418	2.97994	1.98454	1.99678	1.65198	2.44927	2.5256	2.38643	1.87636	2.02126	2.17006	1.92828	3.39876
ATOH8	9.78468	9.43371	9.2691	9.56263	10.3799	9.6984	8.96719	9.81607	9.42068	9.53547	9.41063	9.21319	9.76352	10.2655	9.41335	9.91248	8.86244	9.24415	10.1586	9.81214	9.40666	9.01476	9.21244	8.73766	9.76948	8.80402	9.16117	9.35902	10.2174	9.35672	9.85061	9.56797	8.80901	9.87616	8.89988	10.452	9.84577	8.9905	9.28678	9.50791	9.43878	9.1712	9.3864	9.38488	9.61717	9.76613	9.17896	9.99801	10.2835
ATOX1	9.34915	9.8373	9.58158	9.55791	10.1492	9.60279	9.76443	9.45565	9.70918	9.42029	10.1671	9.57097	9.54931	9.52029	9.36601	9.61763	9.65325	9.67278	10.4158	9.448	9.73323	10.1353	9.94408	10.0461	9.90133	10.1605	9.83979	9.83477	9.56081	9.64755	9.33754	9.48356	9.75294	9.80965	9.80585	9.74546	9.6537	9.89064	9.11414	9.49818	9.27303	9.79687	9.69106	9.74121	9.38755	9.99742	10.7292	9.53647	9.34457
ATP10A	11.1096	11.6229	11.0636	11.2372	10.6311	11.183	10.8789	10.572	9.97268	11.5176	11.3936	10.3299	9.72524	11.3771	10.3209	11.5996	10.8491	11.8353	10.4792	10.8494	10.5384	10.5025	9.84405	11.8431	9.90718	11.0968	10.0871	10.5489	11.1752	9.2357	10.3273	10.1939	10.0578	10.709	10.7725	10.8209	11.2614	11.2234	10.535	11.0125	10.1385	10.2089	10.2487	10.2371	10.9028	10.3092	11.0787	11.335	10.7965
ATP10B	1.6497	3.11748	1.82216	2.05204	2.42575	1.96736	1.97426	3.84654	2.06693	2.35665	4.35712	5.63781	2.07254	2.07826	4.85464	2.05625	2.14131	1.67639	3.72993	2.65253	2.29615	1.95663	4.32962	2.91869	4.6641	1.84711	5.99812	4.16715	2.01008	5.00782	2.08257	1.84082	4.60135	1.90663	4.05895	2.02799	1.57944	2.57432	3.59633	3.41419	1.94437	4.68479	1.81303	4.08495	1.95183	2.22011	2.32658	2.01903	1.96348
ATP11A	12.0892	11.622	11.8747	11.0263	8.93968	11.6634	11.1239	10.659	11.6734	11.1767	11.6772	10.1989	10.5977	12.0325	11.4415	12.022	12.1441	12.1049	11.603	11.477	10.3072	10.6784	10.8696	11.8574	9.89882	11.1837	10.4212	11.1007	11.4381	10.0324	11.6182	11.3369	11.3874	11.5626	10.8785	11.0355	12.1084	10.8865	10.8837	10.8955	11.4139	10.6894	11.0266	11.5712	12.0151	11.1434	11.0689	11.7504	12.0842
ATP11B	9.48612	9.49035	9.29429	8.96234	8.18087	9.03504	9.04379	9.62302	9.4881	8.68606	8.64605	9.40838	9.11969	9.36501	9.29503	9.35023	9.53975	8.85446	9.00227	9.47062	9.36559	9.22355	9.22863	9.17996	9.13177	9.38927	8.9499	9.33199	9.20988	9.58384	9.6489	9.58335	9.15591	9.18389	9.26398	8.88188	9.44537	9.80616	9.28196	9.00313	9.47494	8.94004	9.4352	9.14914	9.22849	9.41319	9.03479	9.42194	9.66208
ATP11C	7.99127	8.64676	8.24226	7.90399	7.72519	8.10089	8.55782	9.05895	8.56796	8.49375	7.7191	8.65842	8.09549	8.88937	8.56212	7.80714	9.1264	7.77558	8.64135	8.27689	8.55186	8.27291	8.70229	9.31701	8.40694	9.01533	8.64652	8.55694	8.52014	9.04054	8.39806	8.22242	8.66195	8.5943	7.91049	7.47427	8.42034	8.99295	8.21892	8.26912	7.93316	8.3889	8.40284	8.4418	8.53535	8.89014	8.59342	8.37999	7.99665
ATP12A	4.95997	2.89589	7.81789	2.44817	8.36131	6.47136	6.52938	7.53762	5.44371	6.50432	4.67515	9.12392	8.60726	2.09355	8.10255	7.35637	3.36681	4.91208	7.46307	8.4308	8.06169	8.04736	7.6289	2.57082	5.07779	4.17058	5.31632	7.77878	7.49124	5.21241	6.60293	5.78789	7.63565	5.10571	9.20713	7.69677	3.2733	4.10096	6.65338	7.53112	7.71479	8.32511	8.13257	6.7803	5.27272	8.86654	3.58042	7.15204	3.47124
ATP13A1	8.95563	9.32332	9.38787	9.20735	9.95247	9.33885	9.57775	9.71194	9.3991	9.21574	9.59459	9.38214	9.18641	8.69691	9.09749	9.43104	9.10548	9.56322	9.62291	9.05457	9.43659	9.4028	9.49933	9.04528	9.31054	9.26804	9.33265	9.33452	8.91662	9.62747	9.10229	9.46485	9.37991	9.15248	9.17974	9.24256	8.80404	9.58899	9.02152	9.26089	9.18643	9.44046	9.2603	9.26374	9.0521	8.80349	9.2848	9.41431	9.04917
ATP13A2	7.15069	7.66756	7.32289	7.68654	8.6625	7.62418	7.64357	7.19101	7.08358	7.44121	7.91499	6.96269	7.21879	7.22114	7.53417	7.41686	7.33177	7.84738	6.998	7.17887	7.24393	7.34257	7.19393	7.17588	7.42298	7.18611	7.65814	7.72322	7.52478	7.03826	6.85859	7.43995	7.11025	7.10469	7.18952	7.42044	7.35474	7.23045	7.24378	7.49138	7.10252	7.44856	7.22636	7.3419	7.32498	7.1016	7.60776	6.95194	7.41093
ATP13A4	6.67786	6.526	6.52146	6.58422	5.39531	7.02586	6.63969	5.7561	6.2677	6.38958	7.04369	5.98224	7.08216	5.70741	5.88402	6.52021	6.34035	7.47342	6.63646	6.59598	5.76366	5.66653	5.41158	6.4884	4.10717	4.88747	5.11314	6.16437	6.02477	3.61953	6.58349	6.81537	6.34839	6.449	6.4295	6.71882	7.6665	6.06345	6.43834	5.67653	7.33023	6.13517	6.06843	6.07899	6.11569	4.81162	6.42429	6.75594	6.61581
ATP13A5	2.90408	2.10543	2.02737	2.05915	3.96961	2.03141	2.32865	2.05769	2.10148	3.34089	2.08689	2.14247	3.86133	2.78984	2.00334	2.21198	1.91896	2.85973	2.12035	1.8089	1.81638	2.00925	1.81434	1.9434	3.72805	1.90721	1.96617	2.33213	3.43956	2.05983	2.33595	1.95113	2.06937	2.05152	2.11754	2.07397	1.85216	2.05088	2.04845	3.65294	2.20628	3.03042	2.67094	2.06858	2.02681	3.08236	2.30608	2.05398	2.59557
ATP1A1	13.6565	13.4165	13.3228	13.4688	13.4485	13.624	13.4997	14.3316	13.546	14.1727	13.6461	13.5374	13.7143	13.1099	13.47	14.1713	13.2374	13.8416	14.3123	13.6981	13.626	13.6563	13.3086	12.8802	13.3219	12.6936	13.2958	13.3641	13.2092	12.8004	13.5264	13.5343	13.5365	13.4944	13.7672	13.7729	13.1387	13.594	13.7198	14.1923	13.8106	13.9567	13.3693	13.2677	13.3882	12.8575	13.2792	13.7612	13.4145
ATP1A2	9.98164	11.285	10.1337	10.2472	9.41645	9.94234	9.83199	11.5584	11.3443	10.9034	10.1906	11.7702	11.2366	11.4146	11.4776	10.2436	10.465	9.91459	9.50617	11.0968	11.4849	10.3318	11.5264	9.91159	11.6113	10.9408	10.7027	11.7506	11.358	11.2768	10.941	11.791	10.713	10.9983	10.6975	10.6614	10.5811	9.71371	11.0586	8.65773	9.39592	9.69787	10.2708	10.4954	10.0528	11.3375	8.65307	11.2857	9.72187
ATP1A4	9.42534	8.97927	9.06242	9.14866	9.57002	9.42182	9.17231	10.0331	9.28782	9.28669	9.51265	9.24029	9.57339	8.68523	9.24258	10.2597	9.02566	9.34218	10.0196	9.33407	9.42235	9.6816	8.88538	9.33288	9.0277	8.08272	9.23799	8.94978	8.91212	8.40919	9.16244	9.49141	9.42148	8.71003	9.58625	9.28369	9.28136	9.03297	9.03106	9.03903	9.94668	9.57494	9.16705	8.99089	8.92693	7.92762	9.19218	9.50943	9.33823
ATP1B1	13.9135	14.2517	13.9713	13.0849	12.4	14.1739	14.3764	15.3883	14.7296	13.8386	13.9946	14.7416	15.4126	14.2844	14.1509	13.9373	13.5772	14.3068	14.9659	13.9139	14.1256	14.8627	13.7126	13.9902	13.5577	13.3165	14.0133	14.1863	13.9019	12.2285	13.9094	14.0566	14.3773	13.9102	13.8879	13.3743	13.7749	13.9937	14.4896	14.7872	15.0229	14.851	13.7724	14.572	13.7432	14.0754	13.7025	14.0214	13.8161
ATP1B2	7.58278	8.43394	7.75887	8.65705	8.598	8.20582	7.86248	7.91675	8.50639	7.95688	8.59023	7.9775	8.32426	7.2429	7.89442	7.45098	7.89139	7.46721	8.03253	8.0013	8.20855	7.33176	9.05808	8.27394	9.22254	8.13024	8.47759	8.04575	7.7236	9.5138	8.16248	8.66238	8.56466	8.42141	8.43386	8.63586	7.35352	8.222	8.30627	7.8629	7.9584	7.7392	8.7131	8.47749	7.68282	7.74109	7.37322	8.73833	8.37169
ATP1B3	13.5714	14.0246	13.9203	13.7515	13.256	13.6261	13.9125	14.8248	13.5955	14.4094	13.8569	13.8869	13.501	14.19	13.33	13.7435	13.6629	13.7665	14.5616	13.6225	13.2212	13.7752	13.271	14.1759	13.6432	13.9368	13.2903	13.3419	13.2571	13.1423	13.1683	13.3096	13.5002	13.547	13.4544	12.9261	13.2895	13.8036	13.8743	14.7024	13.3661	13.5021	13.1463	13.5075	13.6365	13.1234	14.0212	13.852	13.8219
ATP1B4	1.72637	2.31814	1.80883	1.9042	3.09977	1.9521	1.83829	1.91958	2.20018	1.89074	1.94833	2.24736	1.98433	2.28234	1.84134	2.04239	1.9007	1.77747	2.00421	1.74437	1.83405	2.19811	1.88087	2.02268	2.08133	2.01908	1.8335	1.99666	1.95921	1.91842	1.9627	1.82	1.86776	1.85383	2.00204	1.93584	1.61066	1.80914	1.8072	1.81528	2.21697	1.71642	1.97055	1.98926	1.82842	1.99623	2.1247	1.91203	1.92713
ATP2A1	2.1513	1.97343	1.90064	2.67684	4.13429	1.93485	2.00775	2.4487	2.01411	2.25105	1.8456	1.84056	2.91113	3.18949	2.42973	2.04196	1.60493	2.43627	2.3622	1.65084	3.16588	2.46359	2.10569	2.00941	1.75377	2.18929	2.57883	2.43105	2.01455	2.08559	2.53333	2.73188	2.00786	2.48323	2.30299	2.1426	2.04556	2.85675	2.36022	2.38731	2.46613	3.14095	1.94522	2.46766	1.92016	2.18777	2.22241	2.22121	1.94197
ATP2A2	8.26667	8.95529	8.4192	8.0418	6.43754	8.14522	8.19726	9.16292	8.83052	8.84907	8.9374	9.33763	9.27764	8.11656	9.10685	8.34433	8.2043	8.39088	8.36682	8.85357	9.02535	8.71532	9.36259	8.02341	9.17507	8.3001	8.38104	9.1871	8.38798	8.33716	8.54836	9.63803	8.68009	8.39939	8.94109	8.62592	8.2226	8.46447	8.61826	9.68993	8.78787	8.6369	8.78956	8.35899	8.30336	8.40868	8.16536	8.7609	8.30818
ATP2A3	4.91755	4.69614	5.37203	5.36794	4.68913	5.10736	5.49677	5.41357	5.35832	5.03497	5.22824	5.38176	5.34785	4.74329	4.96985	5.28108	5.06854	4.80217	6.33868	5.24793	5.55039	5.40006	5.50987	4.17825	5.55659	5.32709	5.48766	4.99581	4.98032	5.34	5.32776	5.9272	5.68692	4.48689	5.40457	5.5064	4.8899	5.89922	5.04204	5.59863	5.43029	6.14712	5.04416	5.3018	4.50835	4.24567	5.25429	4.61059	5.44915
ATP2B2	1.89544	2.37836	2.05757	2.22963	4.28432	3.24691	2.36764	2.20406	2.24475	2.30245	2.26677	3.27957	2.75535	2.67128	2.10366	2.22263	1.76761	1.96317	2.30755	3.49882	1.98004	2.31222	2.10371	2.86577	2.15808	2.10019	2.70627	2.46627	2.20556	2.33881	3.50305	3.52843	2.3026	2.13847	2.11476	2.22758	2.30175	2.23511	2.23059	2.24941	2.26852	2.01196	2.37945	2.15909	2.16767	4.25655	2.3571	2.24018	2.19996
ATP2B3	2.19875	2.12514	2.2861	2.32247	4.4123	1.91442	1.86188	1.91552	2.77932	2.97328	2.74295	4.15801	2.33236	2.28456	2.40127	2.23642	2.77386	2.11764	2.82009	3.45513	3.46379	2.1272	3.1072	1.83854	2.56473	1.91041	4.31736	3.43289	2.91779	2.31819	3.16749	2.55985	2.72767	2.63678	3.141	2.47853	1.66062	4.41116	2.33631	2.34754	4.07145	3.06796	1.89467	3.15331	2.31302	3.64994	2.25609	2.26675	2.52051
ATP2B4	5.77922	5.29969	4.75121	5.60201	5.15333	6.01259	5.42321	5.31796	5.35225	6.33257	5.53773	5.38926	5.53242	5.23931	5.18827	6.1725	5.96139	5.66218	5.86706	5.97723	5.47055	5.27544	5.56637	5.66334	6.04207	4.72179	5.22822	5.44109	5.30223	5.27326	5.40476	5.60405	5.49507	5.39311	5.48941	5.84646	6.03574	5.57432	5.56404	5.29404	5.56892	4.97896	5.02072	5.37398	5.5907	3.66976	6.00931	5.3269	5.99234
ATP2C1	10.1942	10.1059	10.2192	9.9909	9.62061	10.2375	9.96051	9.63551	9.96797	9.52045	9.94175	9.74772	9.62771	10.1866	9.85417	10.3334	10.2034	10.1738	9.50917	10.1046	9.70087	9.85363	9.63079	9.67669	9.43949	9.89705	9.36476	9.61257	10.165	9.31289	9.84637	9.97011	9.92356	9.87157	9.74072	9.73247	10.3645	10.1497	9.618	9.85276	10.002	9.71443	9.97245	10.0562	10.271	9.7666	9.88152	10.0925	10.2961
ATP2C2	10.0136	8.61336	9.60117	8.80905	8.63076	9.65745	9.66777	9.92975	8.81427	10.0273	9.70809	10.9569	10.5434	8.8573	9.5024	9.04821	8.98177	9.39452	10.6073	10.1329	10.7004	9.96823	9.76726	8.55527	8.19238	9.20099	8.91076	9.45861	9.7723	7.14105	9.97984	8.56001	9.61866	9.75101	10.5257	10.2643	9.30311	9.30195	9.8075	11.2108	10.7197	10.1513	10.1611	9.80642	9.32127	8.91869	8.60413	9.58563	9.11351
ATP4A	2.31887	2.00214	2.07693	1.87043	2.27318	1.93823	1.84986	2.05068	1.94364	2.08427	2.74486	1.56123	2.17869	1.90507	1.80128	1.98978	1.26345	1.68723	1.94851	1.66775	1.74668	1.90263	2.52434	1.82634	1.75961	1.85902	2.23836	2.85433	1.97449	2.97314	2.39289	1.74242	2.1998	2.29939	2.21739	1.87666	2.18432	1.78181	1.7802	1.78692	1.83644	2.18622	1.79302	1.7841	1.80413	1.99208	2.0891	2.24716	1.85054
ATP4B	3.15725	2.14087	3.83914	2.17351	2.88628	2.06274	2.40038	2.23869	2.16605	2.51262	2.02045	1.8724	4.47714	2.18618	3.84127	2.14241	1.83113	3.02118	2.21324	2.66994	4.60542	3.30798	3.53096	3.13914	2.61641	3.7354	2.11035	2.63566	2.15668	2.24562	2.64365	2.90162	3.3642	3.69726	4.46095	4.24431	1.47065	2.43696	2.21106	2.22339	2.82308	3.50505	3.31656	2.6755	2.09597	3.19251	2.33243	2.49954	2.68391
ATP5A1	13.4181	13.3937	13.2079	13.2651	13.0776	13.2499	13.1286	13.0766	13.3406	13.2923	13.2256	13.1602	13.2857	13.0206	13.5066	13.5275	13.3178	13.4369	13.3894	13.4034	13.398	13.5521	13.3399	12.9022	13.2295	13.2021	13.198	13.3509	13.251	13.0116	13.3098	13.4341	13.2886	13.3387	13.6363	13.3973	13.1937	13.0763	13.5586	13.4045	13.4714	13.4624	13.3333	13.3681	13.2443	13.083	13.2921	13.2478	13.4204
ATP5B	12.3197	12.0726	12.1431	12.4962	12.3469	12.3362	11.8896	12.1705	11.8448	12.5471	12.2157	12.2389	12.2233	11.9484	12.4392	12.5653	11.8377	12.5251	12.1666	12.3932	12.2669	12.4107	12.2285	11.6665	12.3062	11.9138	12.2245	12.0877	12.2678	12.0338	12.4235	12.3687	11.9835	11.9634	12.3467	12.3487	11.9981	11.8788	12.3414	12.5859	12.3593	12.3463	12.2388	12.0485	12.236	11.8108	12.1058	12.2786	12.4904
ATP5C1	10.6426	10.4523	10.5371	10.332	10.579	10.4179	10.1429	9.88821	10.5154	10.3909	10.6075	10.4198	10.3647	10.5893	10.5018	10.6606	10.2304	10.8388	10.3398	10.5653	10.1676	10.6562	10.543	10.6038	10.412	10.1422	10.3209	10.2304	10.5193	10.2044	10.0937	10.1479	10.3099	10.5596	10.5946	10.4965	10.4122	10.0969	10.7836	10.3859	10.4335	10.353	10.2066	10.4821	10.5439	10.3047	10.4852	10.3904	10.5557
ATP5D	9.95558	10.228	10.1101	10.1347	11.1317	10.1397	10.1	10.0283	9.85359	10.0728	10.5763	9.93805	10.3612	9.84991	10.2188	10.0593	9.88379	10.3005	10.437	9.90503	10.1223	10.2884	10.3701	9.82488	10.3651	10	10.296	10.4332	10.046	10.5656	10.0741	9.89724	9.85104	10.2958	10.2365	10.5482	9.86401	9.83018	10.0502	9.7079	9.79983	10.1049	10.0162	10.3303	9.97956	10.348	10.2172	9.84084	9.74816
ATP5F1	12.2607	12.1494	12.383	12.2138	11.659	12.2123	12.0205	12.0535	11.9629	12.2727	12.3073	12.425	12.2215	12.4759	12.3903	12.2142	12.1314	12.5353	12.038	12.4601	12.2252	12.5983	12.4152	12.1519	11.9657	12.3423	12.2557	12.3423	12.3101	12.2807	12.1249	11.9954	12.123	12.5133	12.4293	12.3439	12.1276	11.8864	12.5372	12.2786	11.9641	12.5023	12.3348	12.4878	12.4439	12.4534	12.324	12.147	12.2422
ATP5G1	10.4313	11.0172	10.8105	10.4209	11.5299	10.9341	10.7611	10.4286	10.9002	10.6903	11.2358	10.8747	10.8772	10.7559	10.788	10.5752	10.569	11.2023	10.8423	10.5684	10.7029	10.7794	10.8716	10.6353	10.964	10.7637	10.9391	10.8162	10.6657	10.9895	10.4909	10.5637	10.6769	10.8427	10.6064	10.8423	10.5252	10.7359	10.6734	10.6453	10.8441	10.5031	10.6537	10.847	10.7206	11.0349	11.2678	10.5901	10.5217
ATP5G2	13.2435	13.6733	13.3931	13.4188	13.4514	13.637	13.8142	13.2802	13.5408	13.3285	13.6181	13.3481	13.9347	13.2909	13.5532	13.3284	13.2978	13.4772	13.7537	13.4335	13.6637	13.5768	13.5864	12.6095	13.448	13.6343	13.6261	13.6041	13.4151	13.2835	13.3712	13.3163	13.3973	13.6303	13.6398	13.7561	13.4105	13.1442	13.6303	13.5447	13.4027	13.6368	13.4651	13.6606	13.4967	13.8077	13.44	13.5161	13.2437
ATP5G3	13.6871	13.8653	13.8889	13.8755	12.9026	13.9926	13.5432	13.7393	13.7666	13.8371	14.032	13.7396	13.7674	13.698	13.5374	13.9469	13.5089	14.3604	13.5395	13.8339	13.4974	13.9523	13.6185	13.7886	13.7424	13.7703	13.2866	13.5477	13.6583	13.4601	13.5253	13.42	13.7094	13.7496	13.6588	13.601	13.6506	13.461	13.9364	13.6099	13.6524	13.6867	13.6598	13.771	13.7665	13.6773	14.1391	13.6626	13.8215
ATP5H	13.2833	13.3377	13.1459	13.2167	13.1657	13.2071	13.3664	13.0027	13.2348	13.2999	13.3581	13.1139	13.145	13.1766	13.2248	13.4102	12.9887	13.5261	13.4033	13.3697	13.116	13.1962	13.1351	13.5685	13.2729	13.3468	13.2525	13.2227	13.2309	13.0044	13.0793	12.9227	13.3438	13.1783	13.3019	13.1723	13.0679	12.9045	13.4221	13.3854	13.2475	13.0449	13.0994	13.2356	13.1971	13.0738	13.5868	13.1639	13.0647
ATP5I	12.6743	12.9087	12.8317	12.6736	13.0664	12.9218	12.9426	12.3631	12.678	12.4663	12.9457	13.22	12.9604	12.7468	12.7836	12.4718	12.7147	12.9669	12.7709	12.5978	12.6305	12.5566	12.949	12.6214	12.9559	12.8006	12.7362	12.8331	12.9422	12.8992	12.6453	12.3333	12.6073	12.6874	12.5301	12.7679	12.8524	12.6543	12.5656	12.7084	12.5604	12.552	12.6652	12.809	12.7896	13.1014	12.7315	12.482	12.6619
ATP5J	12.4196	12.5208	12.5864	12.5253	11.6507	12.8785	12.8197	12.4095	12.4394	12.4415	12.3968	12.6988	12.443	12.3955	12.3325	12.527	12.4098	13.0809	12.7426	12.3556	12.6157	12.5121	12.7538	12.3083	12.6601	12.4952	12.4753	12.6455	12.4443	12.2475	12.3304	12.4486	12.6816	12.7434	12.278	12.6321	12.6471	12.4866	12.7685	12.8337	12.3418	12.4059	12.2879	12.561	12.5617	12.054	12.7842	12.1952	12.4674
ATP5J2	10.3557	10.4837	10.6071	10.2193	10.2087	10.5008	10.6853	10.0992	10.0697	10.1662	10.6675	10.5134	10.4077	10.0666	10.2021	10.4753	10.1767	10.8678	9.99334	10.2495	10.1851	10.5696	10.2067	9.98747	10.1248	10.1587	10.2293	10.1879	10.1275	10.1613	10.0234	10.026	10.1662	10.211	10.3586	10.3184	10.3898	10.2738	10.3577	10.6061	10.3505	10.3565	10.1136	10.5192	10.4491	10.5973	10.4991	10.2694	10.0097
ATP5L	14.2728	14.2076	14.4687	14.3336	13.8014	14.3576	14.5439	13.9944	14.1569	14.4301	14.2225	14.2221	14.2698	14.4808	14.0302	14.2809	14.2397	14.5089	14.3609	14.3516	14.1755	14.1939	14.4297	14.021	14.202	14.0623	14.1189	14.2058	14.1063	14.2308	14.194	14.318	14.2303	14.372	14.1884	14.2439	14.2843	14.1581	14.2832	14.0846	14.3558	14.1564	14.0356	14.3157	14.4024	14.115	14.3058	14.0252	14.3401
ATP5O	14.1194	14.2118	13.9786	13.9886	13.5555	14.1856	13.8903	13.6239	14.2318	13.9491	14.0952	13.9727	14.0011	14.0226	14.1388	14.1782	13.8151	14.2387	13.9143	14.1586	14.135	14.0813	14.0904	14.0113	13.9552	13.9156	13.8198	14.0724	14.0357	13.7179	14.1424	13.9837	13.8274	14.1171	14.131	14.2191	14.0028	13.7524	14.3448	14.0583	14.128	13.9225	14.1103	13.9534	14.0879	13.9579	14.0371	13.9021	14.0727
ATP5S	7.99258	8.07983	8.23392	8.04346	7.79683	8.10484	7.88918	7.90994	7.4178	8.0144	8.19896	7.94579	8.5801	8.25113	8.01094	7.69173	7.57079	8.3211	8.12349	7.93718	7.88622	8.12283	7.97859	8.39367	7.8157	8.09325	7.81304	8.28209	8.41095	8.02415	8.04823	7.53224	7.84456	8.14424	8.20795	8.13347	7.8966	7.9428	8.37922	8.116	8.10247	8.18084	7.7909	8.37532	8.19685	8.46622	8.14502	7.91715	8.14901
ATP5SL	12.0454	11.6322	11.7865	12.252	11.1224	11.9578	11.8133	11.3879	11.745	11.8786	11.7518	11.4859	11.598	11.8791	11.4653	12.1401	11.9401	11.8614	11.3701	11.6515	11.3713	11.5683	11.594	11.731	11.619	11.4733	11.4826	11.5032	12.0228	11.515	11.7085	11.6191	11.6098	11.7151	11.5328	11.9075	12.1771	11.396	11.8308	11.3869	11.4933	11.523	11.5638	11.7326	11.9793	11.5611	11.6237	11.6532	12.1374
ATP6AP1	12.5919	12.3748	12.9915	12.8578	12.1185	12.7065	12.7727	12.7541	12.1319	12.7856	12.732	12.2686	12.8738	12.3948	12.4026	12.8369	12.4788	13.0209	12.5455	12.6533	12.6328	13.1666	12.1389	11.8664	12.2044	12.8756	12.1784	12.4577	12.7542	11.8896	12.4311	12.3959	12.3379	12.5341	12.7099	12.3495	12.5051	12.5826	12.1779	12.7938	12.2559	12.6631	12.7551	12.5833	12.4511	12.5121	12.5113	12.5274	12.366
ATP6AP2	11.7767	11.896	12.0494	11.7263	10.4877	11.5489	11.6331	11.6592	11.6437	11.3552	11.8313	11.6574	11.609	11.7689	11.6084	11.9341	12.0224	11.4913	11.1726	11.8081	11.4322	12.3442	11.8484	11.7858	11.5629	11.9371	11.6935	11.4179	11.4972	11.5038	11.3023	11.7872	11.5074	11.8114	11.8003	11.376	12.0043	11.3545	11.5645	11.253	11.6239	11.5903	11.7299	11.7745	11.6266	11.7916	11.1566	11.8059	12.0305
ATP6V0A1	12.7225	12.3247	12.3125	12.4704	12.7258	12.3509	12.3625	12.1779	12.2953	12.4491	12.4112	11.7955	12.2547	12.4534	12.1823	12.5666	12.3385	12.1663	12.3728	12.2697	12.1858	12.676	12.1331	12.1793	12.2409	12.4701	12.2146	12.097	12.5616	12.0717	12.2726	12.1159	12.3727	12.0996	12.1594	12.2626	12.3697	12.3886	12.1818	12.0987	12.0354	12.0815	12.3984	12.4887	12.4456	12.0202	12.3647	11.8652	12.1786
ATP6V0A4	5.66037	7.55779	7.50204	6.77317	6.29754	7.27212	7.25751	7.00148	6.96277	6.11647	8.18545	7.509	6.36222	8.09514	7.28513	7.13836	5.80987	7.22722	4.94812	7.23439	7.11004	5.75859	6.61635	6.80881	5.17772	5.06705	4.10364	6.55797	5.53658	5.60371	6.30628	6.75251	6.66471	7.72561	7.19552	7.35347	5.57321	6.30827	5.12516	8.49163	6.13935	5.78623	7.02344	7.0044	7.79416	6.50888	6.25074	6.74777	8.05512
ATP6V0B	11.8296	12.0881	12.2797	12.0992	12.4145	12.0941	12.1278	12.2001	11.8668	12.3636	12.3788	11.8523	11.7773	11.8712	11.6525	12.2347	11.9095	12.3277	12.2437	11.9204	11.6853	12.7853	11.6689	11.6724	11.7109	12.3687	11.9103	11.8601	11.8254	11.3692	11.6336	11.8628	11.91	11.946	11.94	11.8792	11.8444	12.2674	11.9808	11.8281	11.6124	11.931	12.0024	12.0418	11.9599	11.5615	12.3911	12.0221	11.8894
ATP6V0C	14.687	14.6136	14.7039	14.6422	15.0549	14.7196	14.6894	14.5937	14.3891	14.609	14.7909	14.3623	14.4698	14.4951	14.2687	15.0804	14.3411	14.9874	14.7955	14.7444	14.3669	15.0592	14.0946	14.3576	14.0578	14.6465	14.159	14.2655	14.4946	13.8409	14.1651	14.3048	14.5913	14.5998	14.9479	14.4355	14.3055	14.6114	14.4302	14.8261	14.3812	14.477	14.5736	14.6894	14.6132	14.233	14.9907	14.4209	14.4822
ATP6V0D1	11.1558	11.1841	11.5468	11.3955	12.3552	11.3913	11.3479	11.1132	11.0386	11.1571	11.6342	11.0574	11.334	11.0168	10.9739	11.5316	11.1708	11.5421	11.1952	11.278	11.2232	11.5834	10.9986	10.8162	10.8086	11.6885	11.1146	11.0158	11.1128	10.8155	10.7109	11.0843	10.9683	10.9966	11.4268	11.2236	11.1478	10.9693	11.3951	11.3852	11.0919	11.4909	11.2307	11.4722	11.1198	10.8498	11.4407	11.0447	10.9197
ATP6V0D2	1.71208	5.13104	5.83852	6.22786	4.09823	3.05452	5.81747	5.21102	5.46888	3.6369	5.96433	5.11953	7.11072	2.4472	5.29714	3.84079	3.42965	4.55814	5.70945	3.53403	5.86656	8.56976	3.22569	4.18218	4.35489	5.17605	3.61493	3.24155	3.20301	4.30413	2.27449	5.0336	3.71479	2.05065	5.67446	4.63533	3.46548	5.33534	5.04229	3.14553	4.71914	5.68347	6.32093	5.09607	3.15082	6.21623	3.42002	4.77238	4.01513
ATP6V0E1	12.784	13.2903	13.1584	12.6676	11.9912	13.0769	12.973	12.8574	12.8214	12.8773	13.1222	12.6952	12.9915	13.265	12.9744	12.8594	12.7676	13.3315	12.8474	12.8702	12.4005	13.0443	12.6016	12.9217	12.6065	13.0535	12.9214	12.8545	13.0626	12.6908	12.2068	12.5161	12.7582	12.976	12.6317	12.7207	12.7707	12.9884	12.5989	12.501	12.8408	12.6564	12.5647	13.1788	13.1542	12.9231	13.1724	12.6293	12.6756
ATP6V0E2	7.33612	7.08817	7.67553	7.37435	6.1182	7.99528	7.28892	6.11326	7.5418	6.76622	7.66015	6.10126	7.92818	7.03752	7.28779	7.54565	7.21283	7.9427	7.43171	7.38824	7.23425	7.65383	7.24025	6.936	7.06562	7.26372	6.78442	7.22896	7.43612	7.28021	7.37129	7.18212	7.40105	7.41055	7.02202	7.16945	7.31268	7.17965	7.06795	7.21932	7.15348	7.09136	7.12301	7.73177	7.06298	6.9048	7.34821	7.06943	7.36926
ATP6V1A	12.142	11.867	12.0936	12.1221	10.1608	11.9	11.8136	11.5043	11.9758	11.6534	11.8543	11.5884	11.7855	11.552	11.6834	12.317	12.0668	12.2741	11.9899	12.198	11.7406	12.6492	11.5792	12.3163	11.4775	11.9554	11.6168	11.5364	11.45	11.571	11.6316	11.9356	11.8391	11.9939	12.2618	11.8904	11.9961	12.0892	11.8862	11.8654	11.9818	12.1402	12.0123	11.8884	11.7663	11.6616	12.2401	11.7236	11.9987
ATP6V1B1	4.85344	4.45979	3.90652	3.74437	4.54774	3.04294	5.29195	4.00963	4.52043	4.3628	4.10939	3.5908	5.77466	5.16943	4.60816	4.02826	3.9049	3.69115	3.92713	3.40695	4.42587	4.37481	4.25524	4.22237	4.77513	4.53162	4.19642	3.97109	4.24088	4.25222	4.08987	3.57217	5.37061	4.5502	5.59624	4.495	4.36373	4.10439	4.27165	5.76432	4.88202	4.31793	4.89241	4.21594	3.68523	5.12901	4.61437	4.09805	2.97374
ATP6V1B2	11.1928	11.2269	11.5183	11.5773	10.3937	11.3954	10.8566	11.206	10.9684	11.8023	11.2455	10.4403	10.9211	10.8807	10.9729	11.7557	11.3061	11.5369	11.1579	11.2585	10.9597	11.9173	10.5385	10.6742	10.7939	11.4496	10.7366	10.5165	10.8477	10.7351	10.9271	11.3865	11.0181	10.9133	11.0445	11.0956	11.4794	11.2209	11.1561	10.488	11.2063	11.4125	11.1775	11.0123	11.116	10.5939	11.9777	11.4454	11.2911
ATP6V1C1	9.81596	10.2134	10.38	10.3393	7.86991	10.067	10.0319	10.2259	9.74549	10.0757	9.70636	10.5652	10.4528	9.92957	9.95026	10.5942	9.50038	10.1507	9.77002	9.9554	9.90274	11.1079	9.56013	10.3963	9.26419	9.98063	10.1098	9.43505	9.95571	9.69129	8.98479	9.61801	9.77964	9.60807	9.88676	9.30966	9.75451	9.37433	9.70187	9.37979	9.99215	10.0406	10.1053	10.1903	10.0304	10.1792	10.7373	10.2012	9.85629
ATP6V1C2	3.84884	3.43336	4.28167	4.19003	6.66396	4.8414	4.72754	4.89014	3.91225	4.20302	4.20631	3.85626	4.17166	4.4183	3.65362	4.02083	3.44732	4.61454	4.84877	3.4145	4.85071	4.17332	5.036	5.47498	4.91941	4.6756	4.13128	4.41038	2.8523	4.20202	3.94559	4.60785	4.17694	4.44536	4.06627	3.98266	3.84479	5.35814	3.9161	5.80098	4.04625	5.08809	4.06406	4.65977	4.63524	3.90158	4.82303	3.9403	4.20774
ATP6V1E1	10.1561	10.2705	10.2211	10.4801	10.1583	10.3738	9.92796	9.88089	10.051	10.3425	10.4985	9.925	10.0823	9.98688	10.3425	10.5019	10.0714	10.5104	9.70082	10.0816	10.0559	10.5303	9.93184	10.1757	9.98081	10.0557	10.0271	9.97913	10.2987	9.9046	9.7896	10.1709	9.98096	10.1595	10.0895	10.0724	10.2767	10.0974	10.03	9.88847	10.1548	9.79623	10.0449	9.7741	9.9201	9.79382	10.102	10.0218	10.2849
ATP6V1E2	7.47812	6.89961	7.43056	6.88287	8.38167	8.09234	7.49408	7.04591	7.59253	6.93522	8.02976	7.48678	7.57971	7.48972	7.3161	7.86861	6.85306	7.18294	7.78768	7.67434	7.91169	7.62782	7.87902	7.51459	7.43879	7.39323	7.88084	7.82768	7.54277	7.6724	7.57806	7.03626	7.8205	7.71169	7.89119	7.57901	7.67628	7.69881	8.04949	7.73528	7.38794	7.8676	7.86305	7.95719	7.643	7.19142	7.22259	7.58595	7.0752
ATP6V1G1	12.729	12.6398	12.4994	12.3363	11.5111	12.4417	12.4293	12.4745	12.6346	12.7224	12.7178	12.8617	12.5298	12.7907	12.6347	12.3396	12.3657	12.6298	12.3932	12.663	12.6296	12.6569	12.5182	12.653	12.5855	12.6277	12.4317	12.5215	12.7016	12.6315	12.3372	12.3011	12.5495	12.6085	12.5521	12.682	12.3505	12.712	12.5524	12.0518	12.7227	12.4012	12.4304	12.7771	12.7477	12.7471	12.4419	12.6472	12.6002
ATP6V1G2	6.24761	6.23987	6.38894	5.78066	7.7051	5.59462	6.0264	5.48346	6.55504	6.04648	6.29847	5.86376	6.25849	6.14147	6.22598	6.18394	6.21865	5.79703	5.47002	6.27845	6.45585	5.50565	6.13243	6.30427	6.50325	6.34917	6.17722	6.1069	6.09217	6.53218	6.71952	6.46435	6.4144	6.70467	6.47898	5.39017	5.74556	6.36871	6.06047	4.92394	5.87549	6.08242	5.9887	6.4598	6.03127	6.58895	6.46662	6.05717	6.48418
ATP6V1G3	1.69906	2.05079	1.84688	1.86829	2.93159	1.84698	1.88239	1.88824	1.87226	2.00364	1.86014	3.12561	1.86317	1.86599	1.83048	1.93346	1.27296	1.74317	1.88427	1.70205	1.78819	3.42849	1.79697	1.83929	1.8879	2.80407	1.74066	1.68687	1.9343	1.84468	1.7957	1.78849	1.89826	1.84458	1.90265	2.16116	2.04283	1.7067	2.68314	2.60824	1.95108	1.69127	1.86205	1.86369	1.85387	1.89931	1.9649	1.87393	1.88354
ATP6V1H	8.51923	8.2574	8.70546	8.54073	6.98457	8.59485	8.10844	8.23227	7.34334	8.30712	8.44097	8.25661	8.51819	8.51012	8.64494	8.92766	8.3212	9.12506	7.81069	8.60396	8.09197	9.19974	8.00308	8.29628	7.86312	8.04692	8.33773	8.03623	8.61836	8.07198	8.31394	8.15546	8.15727	8.40925	8.67291	8.01856	8.71304	8.0722	8.10495	8.58533	8.16262	8.57326	8.19238	8.52083	8.70282	8.21015	8.37474	8.57245	8.69851
ATP7B	8.3331	7.85514	8.22983	8.64876	8.26652	8.44768	8.64686	8.68484	8.33127	8.59828	7.82812	9.41868	9.49052	8.55682	8.93284	8.79309	7.88173	8.31971	8.19889	8.98708	8.95862	8.43225	8.37514	7.84399	8.43225	7.8556	8.45672	8.52967	8.74092	7.68534	8.74092	8.42958	8.79175	8.60552	9.09617	8.67456	8.4562	8.0037	8.69751	9.08388	9.21731	8.94692	8.81481	8.61681	8.27821	8.20794	7.6687	8.09746	8.39517
ATP8A2	8.88173	8.82597	7.96659	8.1459	8.64758	8.17376	7.97312	5.01387	8.17767	7.38935	8.86653	6.8339	7.01572	8.9933	8.07246	9.53886	7.67341	8.40755	8.09346	8.57642	7.33441	6.36091	8.73844	8.78052	6.96934	7.99703	6.80311	8.86284	8.80887	7.62754	8.18594	8.48919	7.77813	8.59691	7.75136	9.21091	8.7247	8.43635	8.09506	8.2905	7.58997	7.53726	8.40692	9.09884	8.59484	8.32489	8.1731	8.54316	8.76034
ATP8B2	5.64895	6.46829	6.16307	6.79613	4.58042	5.77759	5.71116	6.53795	6.61898	6.42925	6.36668	6.23329	5.75115	4.58347	5.41058	5.70087	6.59887	5.71493	6.74922	6.75056	6.43742	5.17487	7.03684	7.36459	6.97361	5.84738	6.0321	6.34705	5.23311	6.51854	6.24672	6.98515	5.85736	6.27411	6.58917	6.72938	6.63574	6.47095	5.582	5.45288	6.04794	5.7403	5.57998	5.75052	5.38099	5.49832	5.74265	6.52714	6.33488
ATP8B3	5.9834	7.36732	7.11989	6.58643	6.42066	6.45749	6.18312	4.05058	6.61321	6.30467	7.27319	4.19539	6.52944	7.67357	6.03094	6.67404	6.50927	7.31035	7.00297	6.44711	5.68609	5.07302	5.34685	6.94924	5.90776	6.84864	6.10693	5.14328	7.63901	6.00779	6.44253	6.05832	5.08739	6.93102	6.68556	5.50838	6.20342	6.48985	6.86252	3.93187	6.6393	5.99995	6.98947	6.3923	7.8394	6.32197	6.48305	6.40746	7.05734
ATP8B4	6.45553	7.80781	6.88468	6.28397	5.95329	6.2617	6.92632	6.98594	7.59842	5.95509	6.69778	7.14275	5.60705	6.85759	6.94044	6.36799	7.01286	6.42377	7.08634	7.11658	6.55091	6.64208	7.17704	7.4978	7.31463	7.69164	7.44824	6.78224	6.15552	7.14543	6.32411	6.75248	7.31391	7.40008	6.5764	5.58328	6.45431	7.07225	6.25524	5.55605	6.5123	6.79581	6.8089	7.2134	6.41648	6.73022	7.49652	6.60156	6.64384
ATP9A	12.2634	11.7321	12.0316	11.596	11.2305	11.8654	12.2969	12.193	12.2771	11.8801	11.8921	12.92	12.6374	12.1186	12.5923	11.5371	12.2047	11.7372	11.6801	12.2714	12.7043	12.1985	12.1223	12.1055	12.2404	11.629	12.1089	12.1766	12.669	11.4824	12.0747	11.8922	12.2919	12.1518	12.4498	12.3034	12.3083	12.1015	11.792	12.7147	12.6956	12.2243	12.4771	12.3755	12.2297	12.3557	11.3432	11.9974	11.8911
ATP9B	9.15454	9.24663	9.6583	9.05876	7.8288	9.21371	9.41972	8.97724	9.06356	8.98233	9.24615	9.05536	9.19403	9.68161	9.13301	9.2759	9.32624	9.5864	9.00699	9.56921	9.09498	9.8838	8.93143	9.03396	8.94297	9.43991	8.87265	8.94491	9.47934	8.91458	8.91458	9.12282	9.14648	9.15409	8.61686	8.62693	9.35028	9.61923	8.74743	8.85493	8.9076	9.24712	9.06907	9.53954	9.44502	9.03463	9.31994	8.95089	8.99364
ATPAF1	6.05925	6.34219	5.3502	5.91038	4.76399	5.37633	5.70268	5.32522	6.49376	5.48706	5.66159	5.44323	5.6224	5.02511	5.6133	6.41526	5.92806	5.54025	5.79937	5.97862	5.88032	5.77488	5.76644	5.57128	5.98472	5.26783	5.3849	5.83543	5.7632	6.12885	6.50045	6.69875	6.21456	5.55581	5.99505	5.55027	5.8714	6.06291	5.72465	5.4057	5.94862	5.28652	5.94706	5.70247	5.68856	5.3317	5.55079	6.03101	6.11839
ATPAF2	8.87204	9.03381	8.96606	8.27932	9.29842	8.55646	9.02337	8.45322	8.98758	8.8781	9.16102	8.55001	9.09553	8.23708	8.87422	8.82991	8.5763	9.04089	9.16666	8.88724	8.8274	9.17133	9.05737	8.77635	8.88391	9.24961	8.97872	9.20832	8.81748	8.93038	8.74923	8.82738	9.0564	9.02383	8.89781	9.00876	9.16874	8.60516	8.86862	8.3708	8.47562	8.99292	8.71489	8.66303	8.68213	8.70768	9.41859	8.96295	8.68754
ATPIF1	13.6416	13.5665	13.7204	13.2299	13.2713	13.655	13.9633	13.5146	13.6065	13.2172	13.6557	14.2887	14.3064	13.3436	13.8524	13.4181	13.4827	13.5796	13.675	13.8837	14.2231	13.8512	13.7543	13.8119	13.5806	13.5257	13.6563	13.8606	13.9539	13.2815	13.7302	13.4555	14.0847	13.7256	14.3378	13.7604	13.6553	13.1944	13.7958	14.3204	14.2323	13.8229	13.9709	13.9022	13.5358	13.9294	13.42	13.6188	13.3853
ATR	9.86941	9.80894	9.89205	9.90565	7.65818	9.81927	9.94532	10.459	10.2643	9.68305	9.04841	10.6621	9.83386	9.65487	9.93499	9.93237	10.2101	9.47528	10.338	10.2527	10.2646	10.0985	9.95036	9.86758	9.79261	10.069	10.1807	10.0174	9.59128	10.3261	9.97761	10.0055	10.2235	10.1677	10.4141	9.24166	9.93497	9.99554	9.53572	9.54753	10.1767	10.4814	10.2039	9.79682	9.88746	10.2984	10.1566	10.0561	9.56816
ATRN	9.11378	8.95249	9.14927	8.88795	8.12203	8.8757	8.98839	8.76365	8.86347	8.76677	9.41653	8.41854	8.68037	8.63494	8.95482	9.25527	8.99839	9.11919	8.52718	8.78649	8.54952	9.25581	8.69705	9.17403	9.02788	8.60092	8.79949	8.9653	8.80252	8.56264	8.82485	9.07596	8.93766	9.07382	9.2689	8.73589	9.31646	8.76249	9.33799	8.74714	8.50981	9.25827	8.98965	9.093	8.94107	8.89993	8.34674	8.30043	9.14309
ATRNL1	1.71663	2.0305	1.88274	1.90428	4.04069	1.83643	1.86508	1.91666	1.83345	1.87839	4.06766	1.72789	6.19848	3.2077	1.80159	1.83758	1.9488	1.74207	1.90795	2.29089	1.80952	1.95383	1.79852	1.82815	1.85433	1.8861	3.63132	1.68972	1.88675	1.76686	1.89523	1.75448	1.79505	1.80124	1.73637	1.89786	1.92211	1.74898	1.74676	1.75602	1.90939	1.7198	1.89048	1.83998	1.86359	1.95838	1.93122	1.91586	1.90692
ATXN1	8.8887	9.32904	8.73751	8.20202	7.02539	8.20878	8.69914	7.97061	8.63997	8.57976	8.37984	7.70422	8.04668	9.3161	9.14419	8.09874	9.29499	8.03835	8.1055	8.53851	8.50273	8.53988	8.79706	8.86425	8.63166	8.90086	8.67665	8.83385	9.04294	8.51979	8.44846	8.81577	8.50576	8.67429	8.46537	8.20878	9.06202	8.40572	8.51218	8.43231	8.50013	8.32722	8.38554	8.58876	8.47534	8.66009	8.17565	8.33741	8.77165
ATXN10	9.99821	10.1495	10.2667	9.84304	9.08923	9.99098	9.91029	10.1858	10.1282	10.176	10.1891	10.3653	10.3983	10.2017	10.5067	10.1078	9.92854	10.0138	9.95636	9.88268	10.1359	10.2517	9.89891	10.2233	10.0925	9.73066	10.1027	10.1926	10.2589	9.7892	10.1465	10.2977	9.90676	9.94717	10.1362	9.639	9.85865	9.79566	10.0841	10.1904	10.2879	10.2396	10.0084	10.2483	10.1022	10.0517	10.1546	10.4498	10.3599
ATXN2	11.3801	11.5431	10.9533	11.2012	10.0702	11.438	11.0935	11.1307	11.6432	11.3335	11.1359	11.3739	11.6918	11.1892	11.2291	11.1869	11.2791	11.2088	11.4745	11.6206	11.8028	11.2904	11.5533	11.5027	11.3907	11.2924	11.0184	11.5023	11.4105	10.9786	11.6502	11.084	11.4045	11.5651	11.8299	11.8548	11.4459	11.3971	11.2974	11.7609	11.7378	11.3055	11.5862	11.198	11.2129	11.1633	11.0907	11.1476	11.274
ATXN2L	5.28425	5.70054	5.35252	5.58217	7.2757	5.58394	5.46544	5.93398	5.76751	5.69168	5.22351	5.29719	5.36885	4.97361	5.09324	5.01665	5.09786	5.42511	6.36163	5.22409	5.63645	5.19166	5.11515	5.6647	5.67556	5.91437	5.60508	4.91829	4.59306	5.70712	5.7846	4.59673	5.63736	4.24352	5.24086	5.65787	5.39356	5.02128	5.59216	6.17686	5.45794	4.75863	5.21703	4.86423	5.37733	6.16895	5.81561	5.84435	5.33176
ATXN3L	1.67285	1.92191	2.00872	2.17503	2.84162	2.16924	2.12577	2.17402	2.25919	2.41824	1.91398	2.32572	4.1875	2.2757	2.26713	2.33214	1.60069	2.03235	5.83345	2.27191	1.70882	2.08834	1.71101	4.93016	2.54638	5.14841	3.75875	1.61701	2.27809	3.38921	4.32962	2.01994	2.13938	2.12589	2.19204	2.18486	1.95947	2.27037	2.26505	2.28721	2.26281	1.67639	2.74013	1.90087	2.06303	2.36843	2.52252	2.16017	2.14416
ATXN7L1	7.33504	6.95671	7.49691	6.51312	6.56299	7.60363	7.25883	6.80347	7.05016	6.60284	6.76969	6.65309	6.07573	7.7436	7.23096	7.73384	7.49661	7.17024	6.96746	7.74171	6.68186	6.8546	7.60031	7.25907	7.43168	7.07826	6.67647	7.29967	7.32098	8.05385	7.46006	7.58886	6.57887	7.84595	7.89577	7.54301	7.17444	7.34029	7.06669	7.31914	6.85501	7.14437	6.60192	6.69239	7.01741	6.90286	7.24817	7.41884	6.71897
ATXN7L2	6.48454	6.15002	6.74462	6.81603	7.72606	7.21207	6.9304	6.76856	6.14505	6.7379	6.77192	6.58698	6.53941	6.85321	6.68423	6.33682	6.66758	6.7055	6.87285	6.42415	6.63303	6.58715	7.08042	7.5498	7.23413	6.8572	7.55717	7.16807	7.29241	6.94227	6.36329	6.51042	6.49267	6.351	7.44522	6.28641	6.36283	7.15894	6.89593	6.69232	6.43232	6.98371	6.54058	6.8635	6.44699	6.4849	6.89627	6.10556	6.16763
ATXN7L3	8.07635	8.31207	7.9748	8.17465	9.01878	8.33959	8.12498	8.37027	8.57232	8.49949	8.59453	7.67794	7.95347	7.92615	8.41001	8.34865	8.32845	8.31706	8.69124	8.16116	8.01832	8.1178	8.25627	8.50198	8.56192	8.32312	8.30906	8.30132	7.96194	8.40081	8.15084	8.32162	8.38079	7.8664	8.28773	8.4065	7.83112	8.27821	8.23423	8.36684	8.17306	8.22492	8.20941	8.06552	7.96107	7.89211	8.41673	8.13097	8.34412
AUH	10.1596	10.161	9.8799	9.54745	8.66513	9.67463	9.70719	9.48158	10.1331	9.65378	9.48763	10.3283	10.445	10.0218	10.1077	9.90407	9.9916	9.6322	9.76098	9.86199	9.77405	9.89888	10.3964	10.0731	9.83619	9.80134	10.221	10.1183	10.1099	9.89051	9.91851	9.95417	9.58356	10.277	9.98747	9.31625	10.1574	9.47181	10.2256	9.28706	9.94359	10.1012	10.0226	10.0296	9.46788	10.0091	9.75317	10.2054	9.75067
AUP1	11.035	11.2181	11.2511	11.2534	11.3956	11.4556	11.179	11.5363	11.147	11.8378	11.2578	10.8094	11.0948	10.4573	11.2664	11.331	10.9646	11.355	11.5201	11.013	11.2562	11.4877	11.0514	10.7575	11.3842	11.1776	11.6535	11.2573	10.9516	11.1993	11.0943	11.1335	11.1729	10.9551	11.0228	11.1708	10.8679	10.6782	11.0364	11.113	11.0379	11.3277	11.0277	10.9171	11.0795	10.5926	11.3719	11.1962	11.1948
AURKA	7.00769	8.10513	7.94682	6.91653	7.20672	7.49934	7.59705	6.75635	6.91091	6.96921	8.09037	6.68078	6.80073	6.95644	7.51234	8.30127	7.81487	7.55889	7.42887	7.07916	6.70026	7.82871	6.72358	7.11006	6.52071	7.97022	6.94584	7.2742	6.45023	6.85146	6.70199	7.63395	7.59081	7.28428	7.41712	7.20082	7.48697	7.29011	7.3164	6.2749	7.00549	7.49522	7.31435	7.8699	7.04625	6.79471	8.58306	7.22586	7.07691
AURKB	4.39303	4.96755	4.36386	3.8688	6.58035	4.81576	4.30996	3.57545	4.23621	3.96553	4.17883	4.5805	4.02499	3.98858	3.99205	5.48388	4.0312	4.65517	4.9342	4.26834	3.67471	5.13621	4.21532	3.99633	3.64834	5.05914	4.97727	4.76789	2.20615	3.47285	4.02478	5.16731	4.04238	4.30975	4.91037	3.75946	3.79215	4.77936	3.80736	2.53079	3.88598	4.641	4.01373	4.81391	3.00827	3.14984	6.02804	4.56291	4.2539
AURKC	3.69371	4.77463	4.21233	5.22233	4.77713	3.88598	4.32985	3.9857	4.21874	4.33697	4.93424	4.21244	4.3587	4.08044	5.17059	5.01693	4.39483	4.92469	4.20415	3.92655	3.60079	4.71857	4.13433	4.97967	4.33687	3.50382	4.46218	3.9228	4.63619	4.74077	4.89444	4.50154	4.84414	4.21576	4.28474	4.84966	5.0431	4.61401	4.48106	4.14909	4.08328	4.00814	3.81442	4.25158	4.11615	2.7829	4.27104	4.88515	4.5609
AUTS2	11.2852	11.1945	11.0586	10.8756	9.37079	10.6982	11.5764	12.2553	11.401	11.8047	11.2215	11.8402	11.7395	11.5777	11.7608	11.29	11.3879	10.9179	12.1954	11.5548	12.199	11.5445	11.7992	11.5693	11.7024	11.1489	11.9433	11.8829	11.6165	10.912	11.5402	11.2109	11.461	11.3936	11.9235	11.5131	10.5829	11.852	11.3124	11.7766	11.9359	11.925	11.6776	11.4484	11.1706	12.0727	10.795	11.7235	11.1406
AVEN	9.09551	9.16036	9.58156	9.52218	8.75071	9.48675	9.81632	10.2577	9.90371	9.66319	10.0072	9.95488	9.3835	9.54463	9.58225	9.68956	9.98531	9.59421	9.9367	9.48056	9.7954	9.73858	10.0961	10.2765	10.2571	9.45766	10.4869	10.2057	9.16634	9.95858	9.20673	9.61548	9.84144	9.69882	9.4401	9.34356	9.52772	9.55698	9.88051	9.61988	9.29499	9.79487	9.43507	9.45145	9.48259	9.4768	10.0062	9.66803	9.11922
AVIL	8.0999	7.77385	7.22564	7.78698	8.64916	7.90974	8.52247	8.18592	7.7855	8.53422	8.51697	8.06083	6.97431	8.43608	7.85423	8.42414	8.46827	7.41564	9.24706	8.38421	8.16754	7.47972	8.06347	8.18024	7.71821	8.10199	9.18225	8.45543	8.00437	7.78688	8.21214	7.43806	7.99496	7.9404	7.5697	8.49487	8.00193	8.5466	7.88228	7.98298	8.35735	8.02791	7.91366	7.70705	7.91418	7.93311	7.76372	7.99454	7.85994
AVP	4.49596	3.97449	5.67612	5.22824	6.02216	5.67954	6.34105	5.67539	3.66268	5.43335	5.90726	4.59532	4.79341	4.32833	5.15116	5.27672	5.12763	5.75926	6.43626	3.95712	4.49788	4.64866	5.44887	6.76215	7.13445	5.36129	6.24242	5.57759	5.12961	5.68534	5.13769	5.20545	5.55293	4.52777	6.60752	5.26781	5.07393	6.60614	4.64187	5.0547	5.01691	4.91642	5.89746	5.61375	4.74824	5.38012	5.57127	4.60506	4.50912
AVPI1	9.84494	10.5169	10.4983	9.85938	9.34265	10.7272	10.1689	10.0413	9.57416	9.97068	10.1905	9.59624	10.2348	10.4068	9.54935	10.2212	9.57561	10.2559	10.2999	10.0967	9.78103	10.7244	9.6163	9.62979	9.43275	10.7409	9.11727	9.64994	10.0785	8.85392	9.7095	9.67516	9.76696	10.2136	10.0135	10.2341	9.7862	10.1385	10.0574	10.8338	9.77631	9.33393	9.76564	9.7857	10.3705	9.88409	9.84013	10.4218	9.82013
AVPR1A	2.04068	3.79891	2.48581	2.2096	3.27418	2.1904	4.49572	6.92525	2.81082	4.54921	4.86256	5.14617	3.87906	4.33053	3.19192	2.38401	2.43791	2.73166	6.66106	2.64014	3.90297	3.96057	4.49252	4.70161	4.69074	2.77672	5.28969	4.08565	2.65979	5.12461	2.17195	2.70816	5.82719	4.10528	2.45792	2.20799	3.53182	2.38465	4.23498	5.03667	4.26652	3.04358	3.86694	3.61862	3.17734	2.42499	2.94146	4.81633	2.15661
AVPR1B	1.8096	2.14782	1.86936	1.92357	2.17574	2.30613	1.87186	1.93385	1.95589	2.54765	1.91887	1.69277	1.95237	1.92519	1.8269	1.9866	1.52804	1.82153	1.98219	1.80501	1.8699	2.04606	2.79177	2.01039	1.91323	2.00229	1.84409	1.81897	1.95413	1.84012	1.90388	2.17729	1.92812	1.87391	1.86995	1.92812	1.7586	1.55179	2.08943	2.22732	2.01094	1.80019	1.91793	1.88111	1.84409	2.0242	2.09663	1.92577	1.90021
AVPR2	5.93356	5.0448	4.87486	6.39651	8.46405	5.30327	5.87659	1.45109	5.70859	5.10735	3.83457	4.18449	4.54066	6.94754	5.38888	5.73446	4.01817	4.93589	4.64912	5.33815	5.60984	4.63693	4.92448	4.84855	6.15282	6.22139	5.99587	4.51145	5.49768	6.28715	5.76634	4.18081	5.44618	5.67326	5.37561	5.51986	5.40371	4.07378	5.62259	4.08102	5.40295	4.5171	4.78559	5.68931	5.78451	5.32734	5.3483	4.64801	5.67615
AXIN1	8.31378	8.97369	8.52399	8.72761	8.57038	8.48368	8.25888	9.13299	8.61961	8.90465	8.99337	8.40556	8.81486	8.56137	8.63286	8.65372	8.31018	8.65923	8.71609	8.60405	8.53022	8.56383	8.39917	7.70827	8.5242	8.70401	8.56006	8.49335	8.37514	8.40871	8.54453	8.79128	8.58582	8.33559	8.36579	8.54127	8.40138	8.82365	8.64725	8.72217	8.51273	8.4151	8.55878	8.6183	8.58723	8.25649	8.26181	8.63732	8.69642
AXIN2	6.71399	6.23876	6.04085	6.98464	4.56063	6.1113	6.65013	6.35232	5.77742	6.63368	5.53556	5.75892	5.9951	5.6221	5.12933	6.67979	6.1345	6.16184	6.5761	6.92341	6.47178	5.91487	6.55414	7.00986	5.98884	5.28116	6.47494	6.58167	6.07492	6.20721	7.71949	6.68399	6.13812	7.15689	6.57484	6.68662	6.86216	6.19289	7.12007	5.5167	6.0349	5.91396	6.23343	5.58099	6.02171	5.72737	6.07733	7.48309	6.56012
AXL	11.2272	10.8273	10.4554	10.7767	9.01339	10.6189	9.9079	11.1958	10.3261	11.0832	10.275	9.93753	10.0625	10.8558	10.3817	10.8129	10.7368	10.7033	10.6211	10.5656	10.0691	10.1104	10.4444	11.023	10.6553	10.5527	10.1432	10.4045	11.2258	9.49985	10.8611	10.6748	10.6386	10.9042	10.2424	10.7163	10.9978	11.2631	10.1741	9.85814	9.89974	10.4992	10.1458	10.5389	10.3904	9.79365	10.8196	10.6438	10.6367
AZGP1	5.23211	6.83295	6.30966	7.60031	9.06131	5.69522	9.22243	10.3109	7.14392	8.15903	8.93063	8.77507	9.58328	6.10145	6.51485	5.03417	5.34334	7.11903	10.3476	8.11409	8.48698	8.79615	7.34308	7.47969	8.30782	6.1994	8.97975	7.22523	9.86116	6.60156	8.16812	5.75587	7.65192	8.52419	7.4756	8.25399	7.11668	8.11551	7.07677	10.5443	5.45404	8.57933	7.55948	6.51225	7.28287	7.74216	5.11683	7.28131	5.37653
B2M	16.4116	15.6768	15.8384	16.322	14.9931	16.435	15.4506	15.5851	16.0892	16.0768	15.4911	15.3708	15.2028	16.2981	15.7882	16.6858	16.3884	16.5903	15.9555	16.2939	15.6692	15.9319	15.8101	15.6142	15.4661	15.9057	15.6464	15.7396	16.4381	15.4819	15.7503	15.9288	15.9845	15.7996	15.7952	15.9743	16.5521	15.9871	15.9275	15.8046	15.6142	15.7906	15.995	16.033	16.1512	15.8115	16.6972	16.2398	16.4602
B3GALNT1	9.60461	8.89307	8.63906	9.88236	8.69568	9.35519	8.35015	7.66181	9.07987	8.11433	8.77894	7.97513	7.73818	9.47558	8.9454	9.3262	9.66847	9.40639	8.1618	9.52052	8.42676	8.39017	8.73627	9.17565	9.06256	8.66537	8.97066	8.5355	9.76112	9.05762	9.0041	8.88514	8.60839	9.00169	9.1803	9.74055	10.5292	8.94342	8.82226	8.04976	8.75334	8.39899	8.87752	8.93686	9.33594	8.74249	8.69739	8.75127	9.94418
B3GALNT2	8.25735	8.79672	8.38549	8.09897	7.0541	8.41675	8.81629	9.17831	8.39799	8.23604	8.34197	8.61526	8.42421	7.49588	7.69246	7.46402	8.28366	7.70409	8.53326	8.39628	8.66579	8.6337	8.96251	8.21174	8.7033	8.44079	8.53578	8.60937	7.42554	8.63065	7.76292	8.39823	8.34425	8.10186	8.67742	9.01936	8.44109	8.59875	8.32907	8.80543	8.26516	7.98647	8.35932	8.02972	7.84131	8.28654	8.29063	8.31034	7.99978
B3GALT1	1.78288	1.96767	1.87501	1.88673	2.62841	1.88428	1.83653	1.99115	1.86819	1.89408	1.81659	1.65742	1.82708	1.8904	1.7851	3.13333	1.45162	1.85728	2.50872	1.79788	1.82102	1.93983	1.83478	2.48077	1.84939	1.90266	3.25524	1.79822	1.89845	2.04485	1.72948	1.67683	2.00007	1.85752	1.80889	1.82079	1.66285	2.33754	2.04997	1.71201	1.9024	1.78464	1.86915	1.81711	2.12234	1.89005	1.99063	1.83356	1.76044
B3GALT4	11.1803	10.6422	11.2426	11.2105	11.3042	11.1332	11.1791	10.4775	10.9404	10.7408	10.9581	10.6844	11.0889	11.1746	10.806	10.9316	11.0595	10.9716	10.5629	11.2061	10.9593	11.1686	10.9297	10.7621	10.9008	11.1755	10.8683	10.8594	10.9491	10.5258	10.9171	10.9649	10.9496	10.805	11.2451	11.2973	11.0944	11.0291	10.9931	11.4761	10.9369	11.0202	11.1079	10.9588	11.0632	10.9359	11.2525	10.6081	11.1223
B3GALT5	1.9131	2.23164	2.15985	2.05533	2.35184	2.74408	2.17076	2.15772	2.0705	2.14832	2.14362	1.80979	4.10013	2.05035	2.11565	2.07097	2.04083	1.93723	2.15926	1.92255	2.00514	2.15185	1.99514	2.02783	2.05089	2.08277	1.85079	1.94785	2.05379	2.16791	2.19979	2.03803	1.99134	1.97451	2.00627	2.36344	1.62239	1.5627	2.1466	3.15747	2.10618	1.91877	2.64844	1.95164	1.99229	2.12074	2.19457	2.12667	2.02559
B3GAT1	6.10048	4.9538	5.54286	5.299	5.98626	5.32855	6.95712	6.66728	6.12302	6.9292	6.07515	6.06555	6.85965	4.91179	6.00361	6.97241	4.94643	5.88016	5.64917	6.51737	5.75033	6.33066	6.32137	4.99363	5.37748	6.59492	6.38209	6.48735	5.91659	5.5877	5.7075	6.38503	6.56373	5.10682	6.19361	6.52012	5.74755	6.032	5.53905	6.56235	5.11571	6.02752	5.69412	5.91726	5.6523	5.96827	6.58158	6.05016	6.31492
B3GAT2	4.05075	4.49658	4.01668	4.74701	3.60791	3.87334	4.44997	3.52166	4.78198	3.99739	3.8119	2.5313	2.84699	2.26093	3.30785	3.69745	4.29902	3.23225	3.91216	3.84227	3.74661	3.5079	3.74947	3.81664	3.84364	3.90384	3.19786	3.60976	3.48547	4.37221	3.06627	4.14736	2.90093	4.43041	4.24904	2.08129	4.43003	5.88314	3.59696	3.61026	3.96791	3.2713	3.35191	3.75027	3.65416	2.553	3.58472	4.45109	4.19024
B3GNT2	8.74341	7.85173	8.77296	8.61664	6.76822	8.44668	8.05207	7.7726	7.64283	8.03125	8.0673	8.23935	7.98718	8.70537	8.16808	8.19991	8.26574	8.72241	7.39053	7.93552	7.62112	8.56297	7.54819	8.19392	7.48801	8.22338	7.3356	7.37013	8.35979	7.6448	8.0689	7.66692	7.57118	7.61358	8.25791	7.80382	8.88957	7.87987	8.10774	8.44806	8.09246	7.98296	8.05171	8.25742	8.70266	8.03117	7.793	8.10159	8.80688
B3GNT3	5.45907	7.95579	8.52297	7.28394	7.86102	7.50562	10.229	9.9565	9.62053	7.17997	8.64317	10.9092	10.3706	7.65242	9.54063	6.56668	6.65684	7.22654	9.21166	8.14582	9.82398	10.224	8.80733	8.91166	9.31589	8.29619	9.52812	8.87865	8.01262	7.35172	6.44353	8.25134	8.97313	7.59173	10.274	9.41639	6.54215	9.06395	8.41826	9.26479	9.20739	9.97213	9.19906	9.32328	8.07981	9.68201	9.24949	9.1553	5.28567
B3GNT4	4.08196	2.30627	3.31924	3.73654	6.62523	2.57721	4.12463	4.90975	3.86534	3.62215	4.0389	4.60581	4.2589	2.9549	3.77321	3.17363	2.52969	4.02099	3.72614	4.05338	4.59327	3.53891	3.12929	1.8225	3.23848	1.79202	3.21177	3.27953	4.09343	3.10555	4.36385	3.98826	3.59387	2.66882	4.861	4.59173	2.3372	1.95141	3.50087	4.46759	4.40107	3.98755	3.60969	3.72898	3.20641	2.13732	3.59776	3.77342	1.79136
B3GNT5	10.1426	9.91188	10.7293	10.3737	8.36399	10.4147	10.3978	11.1846	9.55075	11.2757	10.0669	11.3614	10.6271	10.6328	10.2236	10.5057	9.52354	10.1396	10.5253	10.7812	10.6723	10.8999	9.88821	10.7055	9.13427	10.3041	9.00018	9.63793	10.1964	8.78699	10.2121	9.91047	10.5671	10.6918	11.1291	10.1446	9.82631	11.351	10.5527	11.7208	11.196	10.9729	10.6145	10.361	10.5268	9.84842	9.96051	10.5272	9.83496
B3GNT6	2.09971	1.91997	2.48322	2.21703	2.47704	2.19302	2.18529	3.0577	2.28111	2.48641	2.58056	5.64239	4.75218	2.26738	3.71936	5.33246	2.46444	1.63421	2.28436	2.86384	3.6278	2.88644	2.89218	2.35236	2.93355	2.35523	5.04298	2.72174	2.31264	2.2211	2.15264	2.10595	3.26337	3.38665	2.25578	2.22466	2.31496	1.59914	3.02202	1.98728	4.10208	3.77677	3.11415	1.97088	3.90438	5.12344	2.49654	2.2095	2.16963
B3GNT7	4.31802	4.37837	5.18519	4.43254	3.34784	4.57152	4.79922	4.7601	4.36789	5.0623	4.70616	5.23055	5.26656	3.58525	4.01302	4.8924	4.33765	4.87867	4.88961	5.08782	4.29164	5.04983	4.75653	4.69503	4.45578	3.66419	4.5139	4.94958	5.15031	5.57339	3.97323	4.77403	6.83551	4.66971	5.25797	4.86576	4.8906	4.60384	4.50086	6.25768	4.82233	4.84914	4.74019	4.7523	4.17652	2.43314	4.26089	4.04634	4.72087
B3GNT8	10.6386	9.88165	9.45526	10.0313	10.8939	9.83426	9.96401	8.55142	9.46706	10.7913	10.7297	8.93968	9.47091	10.2861	9.5967	10.0647	9.37664	10.1702	9.89842	9.72433	8.91857	9.45677	9.23119	9.394	8.61992	9.76303	8.96073	9.76657	10.0192	8.47899	9.87825	9.75787	9.20193	9.74905	9.58545	10.2275	10.2383	9.99442	8.89081	9.33717	9.16139	9.04316	9.59628	10.0413	9.55437	9.51799	9.4331	8.95456	10.0007
B3GNTL1	6.62527	6.86918	7.03812	6.28587	6.19053	6.76279	7.30657	7.13731	7.18398	6.85602	7.08651	7.76824	7.46848	6.81864	6.98893	6.43827	6.35263	6.80848	6.48116	6.81925	7.55052	7.15467	6.92097	6.69098	6.92487	7.18985	6.68688	6.77426	6.64938	6.65328	6.56131	6.80041	7.2404	6.80648	7.79473	7.24636	6.45194	7.14674	6.75836	7.87607	7.04618	7.23774	6.9774	7.11438	6.8613	6.62335	7.53098	6.70041	6.40169
B4GALNT2	3.18232	2.55787	3.19137	1.95383	5.7385	3.37601	2.2157	2.67991	3.25282	3.00523	3.44932	2.80199	3.27283	2.44408	2.59945	3.56618	3.0817	3.38942	2.55671	3.38972	3.341	3.33969	3.25959	3.63264	2.35379	3.07195	2.83709	2.92015	2.78912	2.11051	3.50212	3.29656	2.41864	4.9958	2.64591	3.67237	2.67239	2.93731	2.93419	4.98284	1.76435	3.28138	2.72755	2.87379	2.70706	2.49356	2.32179	2.81255	3.32613
B4GALNT3	4.48178	3.38663	5.00697	4.05538	4.72929	4.29407	4.07821	2.90489	2.97945	4.61534	5.21229	4.56547	4.4583	4.04462	3.82724	4.38135	4.00587	3.35128	3.05869	4.54093	4.0331	3.75328	3.59659	3.65333	3.80384	3.51542	4.14462	4.03495	4.21755	2.75283	5.04751	4.65199	4.20385	4.85317	4.62025	4.86458	2.6728	5.32709	3.65656	6.07514	4.50894	4.04716	4.06058	3.62692	5.22979	3.26922	3.43965	2.92924	4.2494
B4GALT1	8.05679	9.00483	8.30286	8.23693	7.79189	8.48088	8.18816	9.42756	9.13883	9.06272	7.98402	9.05888	8.65147	7.40549	8.36177	8.88959	8.00323	8.71734	8.79896	8.40078	8.33499	8.82366	8.62815	8.4344	7.93677	8.40676	8.70638	8.91926	8.04833	8.73131	8.21751	9.60764	8.65567	8.69182	8.98044	8.27976	8.48437	9.37954	8.19702	8.99383	9.0833	8.77365	8.47461	8.70412	7.87019	8.45823	8.67607	9.00504	8.55177
B4GALT2	9.08621	10.0366	9.35962	9.71529	11.0611	9.29375	9.87528	9.60479	9.63382	9.63834	10.2111	9.31754	9.19042	9.79637	9.5003	9.70569	9.75525	9.77449	9.61527	9.31982	9.34569	9.57271	9.77809	9.98553	10.0676	9.48749	9.71017	10.157	9.31255	9.78384	9.45707	9.45183	9.5356	9.625	9.40195	9.61553	9.07338	9.77099	9.47463	9.95074	9.28891	9.54365	9.23873	9.35156	9.84164	9.55619	9.74573	9.63139	9.53099
B4GALT3	9.65931	10.2798	10.0562	10.2175	10.1161	9.96233	10.2939	10.6461	9.98049	10.645	10.3954	10.0657	9.93458	9.96955	10.0144	10.0766	10.2881	9.9742	10.9868	9.598	9.7949	9.76241	10.4086	10.1545	10.0026	9.86115	10.6485	10.4927	10.0273	10.4199	9.86735	10.2065	10.1629	9.76865	9.82798	9.87841	9.87351	10.443	9.84822	10.4158	9.68484	10.3056	10.0051	10.2891	10.0309	10.121	9.71654	9.99121	9.57734
B4GALT4	8.3928	8.43095	8.89131	8.71988	9.84247	8.45295	8.83049	9.22823	8.39905	8.60959	8.8778	9.76823	9.32642	8.79484	9.02255	8.7054	8.82353	8.81966	8.71944	8.7811	8.99884	8.98091	9.07016	9.1365	8.75777	8.19136	9.22466	9.15855	8.91302	8.98734	8.63	8.71588	9.04135	8.88266	9.19971	8.47682	8.62481	8.57665	8.71996	9.68048	8.62133	9.30638	8.92995	9.1013	8.8508	8.96843	8.45371	8.7458	8.17274
B4GALT5	9.39392	9.60681	9.46576	9.69354	9.20048	8.66757	9.51167	10.2814	9.08962	10.7307	10.492	10.2848	9.34197	9.81691	9.8902	9.73706	9.15954	9.06994	10.6747	9.08304	10.1238	9.76194	9.76553	9.20543	9.54968	8.90679	9.80608	9.69781	8.76543	10.2199	8.90119	9.21871	9.03371	9.12096	10.5237	9.53603	8.7746	9.8667	9.74393	10.3575	9.40364	10.4245	9.13425	9.59641	9.64804	9.73591	9.15135	9.10576	9.61494
B4GALT6	4.56804	4.33446	3.65201	3.76714	2.48725	4.80084	3.81133	3.71576	4.52336	3.18824	3.16597	3.67046	3.94652	4.57292	4.54454	4.86043	4.9745	3.59937	3.76461	4.41697	4.3093	3.07496	3.43923	4.39789	4.48362	3.72206	3.93739	2.98325	4.6397	4.27223	4.15072	4.80124	4.63687	4.20393	4.47624	2.49853	5.55355	1.89193	4.71335	4.02211	4.32027	3.63311	4.28045	4.20899	4.47441	2.80651	3.00463	4.49407	4.90451
B4GALT7	8.38556	8.75842	8.69251	8.60777	9.62139	8.85659	8.56988	8.21737	8.93225	8.33034	9.18226	8.36316	8.66093	8.43961	8.65317	8.49579	8.70402	8.91442	8.69067	8.48393	8.7116	8.69551	9.01351	8.63109	9.04872	8.6294	9.05383	9.25858	8.38777	8.71264	8.47066	9.04686	8.89436	8.74725	8.49501	8.64027	8.46796	8.72274	8.61028	8.79277	8.67657	8.75484	8.66013	8.89817	8.42079	7.98881	8.83146	8.64238	8.43171
B9D2	9.72668	9.34399	9.76349	9.18919	10.0951	9.86174	10.1559	10.0706	9.49126	9.90642	9.61305	11.1379	10.5632	9.4746	10.0699	9.15237	9.7261	9.35753	10.1879	10.0869	10.624	10.438	9.9542	9.04056	9.59433	9.81794	9.33636	9.72514	10.0168	9.2307	9.99486	9.45237	9.96904	9.9673	10.6485	10.2268	9.38626	9.56497	9.61159	11.0892	10.4335	10.3663	10.2057	10.006	9.68876	10.1047	9.58309	9.59192	9.11697
BAALC	7.4298	7.29125	7.15935	8.86972	6.87705	7.89016	7.36333	7.55463	7.08461	6.93371	6.52455	7.20945	8.04467	8.20347	7.33587	6.37947	7.30772	8.0013	5.65537	7.24778	7.68041	6.32986	7.12483	7.75347	7.39348	7.55938	6.8758	6.8865	8.32391	7.7215	7.46867	7.12979	7.21039	6.84981	6.48	7.78712	8.81918	6.95782	7.26256	8.37392	6.33275	6.75993	7.26188	7.1844	7.49352	7.72664	6.07633	6.53975	8.08146
BACE1	12.2067	12.8633	11.9155	12.506	12.707	11.7012	12.029	11.9032	12.1739	12.2246	12.6567	11.4918	11.6892	12.5198	11.9136	12.3003	12.0141	12.1271	11.808	12.2476	11.6053	11.4779	12.1012	12.7498	12.2211	12.2548	12.1849	12.1887	12.015	12.2747	12.1711	12.1041	12.1758	12.3283	11.7648	11.4249	12.2174	12.0492	11.9658	10.7048	11.6999	11.6609	11.8349	11.6948	11.9225	11.8932	11.8145	12.161	12.4381
BACE2	10.9555	11.4889	11.2656	11.1981	12.0933	11.5097	11.3772	12.1378	11.5455	11.3112	11.2144	12.5631	12.597	11.1552	11.403	10.4813	11.6998	11.0955	11.7738	11.2659	12.1084	11.9331	12.2087	11.7611	12.0122	11.4288	11.7006	11.8353	10.3568	11.9022	11.1762	11.9413	11.8647	11.595	11.5407	10.9678	10.3988	11.5077	10.7421	12.3475	11.7797	12.1638	11.6163	11.685	10.7117	11.1337	11.205	11.6425	11.091
BACH1	9.953	9.60937	9.93223	9.91159	8.24673	9.9846	9.33861	10.3516	9.73039	10.0272	9.4931	9.77099	9.7075	9.95603	9.56082	10.3208	10.0645	9.73257	9.68806	10.0664	9.4688	10.1909	9.59303	10.4456	9.32636	9.96717	9.54151	9.36864	9.73237	9.41387	9.58807	9.69044	9.78766	10.004	9.72232	9.50276	10.4123	10.5326	9.58563	11.4352	9.6465	9.76194	9.81987	9.96463	9.84877	9.25118	10.2412	9.65499	9.91463
BACH2	6.3109	7.18275	5.82691	6.92734	7.34194	6.17943	6.25899	8.35889	6.77574	7.73452	6.52008	6.28825	5.83766	7.02907	6.08845	6.56397	7.16788	6.03589	6.65617	6.43152	6.26177	6.45492	7.06319	6.39043	6.609	6.37846	6.60586	7.30645	6.90861	7.48354	6.24913	6.87093	5.97231	6.02428	6.25545	6.87326	6.83102	7.29486	6.13711	7.13958	5.70761	5.40972	6.196	6.27661	6.47698	7.05522	5.89618	6.00467	6.89443
BAG1	13.263	13.3284	13.23	13.3005	14.1689	13.279	13.5568	13.5421	13.5564	13.5171	13.1691	13.3436	13.7554	13.2091	13.4963	13.3698	12.9304	13.2704	13.5545	13.2887	13.5022	13.6327	13.2374	12.615	13.3068	12.9522	12.9816	13.272	13.2623	12.6086	13.5829	13.4002	13.2824	13.3697	13.7033	13.6378	13.1506	12.756	13.5633	13.6526	13.4894	13.4151	13.336	13.0908	13.3534	13.2169	13.0284	13.1129	13.3871
BAG3	9.03428	9.53085	9.02005	9.41282	8.81525	9.21791	9.72514	11.0338	9.47474	11.1149	10.1967	10.5457	9.95625	9.73779	9.67587	9.37805	9.16922	9.37077	10.3255	9.08156	9.80627	9.4811	9.23937	9.30803	9.49568	8.51338	9.94077	9.52292	9.11805	8.90733	8.98462	9.57787	10.0103	8.81609	9.19011	9.33226	8.73993	9.70428	9.77776	10.4429	9.56109	9.63911	9.18903	9.4065	9.23513	8.23985	9.28822	9.40345	9.14073
BAG4	5.97849	5.90966	6.25388	5.99732	4.30198	5.80467	5.83355	5.67001	5.36045	5.50494	6.09034	5.46321	5.58001	5.81349	5.72371	6.65194	6.27194	6.81478	5.21176	5.77245	4.81804	6.18722	5.38833	7.25987	5.314	6.02239	4.94708	4.94731	5.31452	5.48594	4.87273	5.37019	5.78623	5.6518	5.69959	5.556	6.31692	6.39876	5.16225	5.9344	5.36071	5.25696	5.35015	5.53222	6.05218	4.411	6.14532	5.76268	5.87507
BAG5	10.1434	9.38745	9.53212	10.3329	8.46111	10.1672	9.63743	10.3941	9.45019	10.3207	9.99272	10.2094	9.627	9.99306	9.52488	9.90995	9.93436	10.0621	9.96042	9.88064	9.96905	9.82313	9.82055	9.79026	9.94072	9.65967	10.1446	9.61287	10.3298	10.1021	10.0124	9.59487	9.60496	9.89851	10.0965	10.3307	10.0479	9.72329	9.72146	9.72906	9.66801	10.2803	9.80326	9.69866	10.0366	9.92375	9.47206	9.41604	10.2217
BAGE	2.39896	1.882	2.7323	2.19005	4.85738	2.12233	2.76928	2.25045	2.21503	2.7305	2.36471	3.20351	2.98825	2.91351	2.06866	2.19805	1.98978	1.98738	3.27241	2.58897	2.49847	1.93663	2.68764	2.8163	2.97925	3.39974	2.96581	2.62545	2.17863	2.40589	2.6638	2.03928	2.0912	2.98903	2.087	2.33183	2.50028	1.4451	2.14345	2.18458	3.33578	2.94937	2.57303	2.38101	2.11296	2.27777	2.35496	2.55929	2.16663
BAHD1	10.7748	11.3001	10.8478	10.9214	10.0215	10.8337	11.1624	11.0614	11.239	11.5528	11.5817	10.4412	10.8823	10.8268	10.649	11.0756	11.1803	11.1029	10.8883	11.0389	10.6569	10.5419	10.6763	10.2102	10.8067	11.1671	10.8493	11.0148	10.9207	10.8823	10.5455	10.8228	10.9393	10.7932	10.6082	11.0668	11.1334	10.9321	11.0727	10.9013	10.6445	10.5935	10.7121	10.9061	10.8993	10.8776	11.0085	10.6885	10.9296
BAI3	6.88547	6.54381	5.583	6.85725	5.57259	6.87888	4.4469	5.34293	6.81947	6.42768	5.3858	6.9313	6.37025	7.0075	6.65739	6.69797	6.83286	6.41062	5.11838	6.25168	6.12396	5.75808	7.06594	6.62322	7.06594	6.3655	5.84915	6.91438	6.83245	6.41783	7.26437	7.08409	6.23896	6.31465	6.51834	6.94911	8.67741	6.1794	7.26969	3.9883	6.37189	6.21264	6.59963	6.57546	6.80917	6.95751	5.20502	6.1368	7.29057
BAIAP2	9.18814	8.18571	8.82655	9.02545	8.19006	9.14541	9.16561	8.01166	8.30672	8.83934	8.341	8.71171	9.46624	8.97152	7.97181	8.62155	8.5595	8.5915	8.41337	8.87887	9.24816	7.98036	8.14001	8.18401	7.42249	7.85625	7.70709	8.092	8.74763	6.66776	9.06354	7.74377	7.81069	8.7461	9.32957	8.8926	8.30194	8.27619	9.20291	9.95089	9.02895	8.19956	8.66792	8.15182	8.84304	8.94205	8.31251	8.84926	8.50856
BAIAP2L2	6.84434	7.2844	6.739	7.02437	9.15829	6.73717	7.08481	6.46998	6.75646	6.98015	6.89011	6.78423	6.85366	7.24643	6.96321	6.87336	7.04097	6.84139	6.67918	6.60515	6.90891	5.97324	6.96029	8.25049	7.26965	7.44443	7.75099	7.28185	7.39814	7.25347	7.53322	6.58177	6.55319	6.92778	6.94749	6.1447	7.14563	7.2403	6.99065	6.67913	7.09409	6.3065	7.28377	6.99506	6.97342	7.3228	7.3666	7.31677	6.64987
BAIAP3	7.24093	4.86088	7.67006	6.66922	6.84751	7.42964	8.28654	9.01176	6.55882	7.23562	6.46888	9.39072	9.37961	6.30749	8.59634	5.76496	6.05464	6.84794	6.99304	8.33349	9.62587	8.78514	8.04354	4.57122	6.77696	6.17594	5.31101	7.94029	8.20564	6.2242	8.10636	6.39535	8.53496	8.07354	8.74527	8.44378	6.08235	5.59188	8.23959	9.58561	8.92269	9.14568	8.30563	8.25622	6.58894	7.92295	6.5097	7.85191	6.22836
BAK1	9.0455	9.21178	9.15417	9.15048	10.4614	9.40772	9.34547	9.27659	9.1899	9.69584	9.52977	8.69961	8.58874	8.90835	8.8251	9.09253	9.24395	9.41568	9.51847	9.16356	8.75717	9.17176	8.92835	8.88813	9.19807	9.54714	9.01394	9.13084	8.73485	9.03912	9.04034	9.13808	9.39421	8.90442	9.00302	9.01554	8.90695	9.4245	8.36277	9.42038	8.45973	8.85801	8.96196	8.98865	8.90282	9.06159	10.1489	8.93622	9.36536
BAMBI	12.4616	11.4718	11.3115	12.1155	10.3516	11.1617	11.552	10.2911	11.2467	11.7967	11.791	10.6069	11.0729	11.001	11.4973	11.4801	11.6659	11.2001	10.8156	11.3158	10.8746	10.9411	11.4351	11.4765	10.9871	10.1533	11.2359	11.3053	11.756	11.4472	11.7007	11.6157	11.5279	11.3226	10.9005	11.5247	12.4137	10.8335	11.0669	10.5086	11.9527	10.8418	11.2688	11.5464	11.488	11.1694	10.6898	11.3576	11.5745
BANF1	10.1461	10.4904	10.2286	10.2816	10.7044	10.547	10.2126	10.0609	10.3791	10.3645	10.5932	10.6252	10.3678	9.71869	10.3538	10.3219	10.2489	10.7412	10.3191	10.1914	10.6083	10.4696	10.2299	9.29496	10.5374	10.1828	10.206	10.0549	10.0074	10.4974	10.3861	10.4366	10.2932	10.2178	10.3176	10.6331	10.2841	10.0004	10.554	10.5066	10.72	10.2965	10.392	10.2977	10.3355	9.97614	10.3975	10.4483	10.2491
BANF2	3.01124	1.87712	1.68295	1.78233	2.5842	1.7933	1.71633	1.78864	1.90034	1.84593	1.87989	3.11567	1.77917	1.84637	1.70986	1.84892	1.46971	1.62991	1.87974	1.64989	3.16655	1.81167	1.67018	2.04048	1.70532	1.76177	1.60162	2.39149	1.79375	1.68806	1.80909	1.6586	1.72595	1.67468	1.84697	1.81119	1.72444	2.10239	1.88028	2.68697	1.74361	1.58767	2.54935	1.76248	1.72189	1.80683	1.92124	1.78202	1.81299
BANK1	8.83953	7.5745	9.01483	8.06768	8.01016	8.88232	8.57237	7.82659	8.79953	7.71445	8.51591	7.57593	7.89013	7.92407	8.07693	8.6259	8.96917	8.2612	8.46597	8.01549	8.0495	7.51003	8.29007	8.89559	8.33377	9.15771	8.74111	8.14623	8.0642	10.7247	8.5826	9.23187	8.63645	8.21357	8.39602	7.91047	8.65266	9.60758	8.61885	7.00552	8.39033	8.89638	8.71158	8.29669	8.19605	8.73382	8.22935	7.61249	8.18235
BANP	7.34194	7.75534	7.44696	7.7773	8.31199	7.6299	7.4017	7.50925	7.81601	7.607	7.49831	7.55124	7.38014	6.84665	7.3122	7.48781	7.85973	7.60145	7.12147	7.68731	7.97504	7.69749	7.492	7.03426	7.51992	6.97581	7.61489	7.15589	7.20826	7.72809	7.74807	7.48296	7.59142	7.17383	7.65586	7.79592	7.64848	8.15741	7.35742	8.06583	7.8533	7.50379	7.5691	7.29143	7.4631	6.57093	7.31649	7.55079	7.378
BAP1	9.59942	9.5668	9.39149	9.82808	10.2788	9.65293	9.47834	9.48724	9.59055	9.95589	9.66005	8.95535	9.3072	9.41774	9.45377	9.77059	9.43398	9.53297	9.73923	9.41235	9.4486	9.52925	9.48464	9.08986	9.69205	9.3905	9.50448	9.42174	9.44732	9.43108	9.7211	10.0405	9.40317	9.30442	9.32699	9.5087	9.41038	9.58137	9.41189	9.18796	9.54576	9.59097	9.33664	9.37948	9.39728	8.90452	9.4561	9.49035	9.93984
BARD1	8.70431	8.15217	8.71074	8.69501	7.99908	8.53651	8.61784	8.2405	8.88767	8.37984	8.1777	8.61817	9.06528	8.05593	8.69715	9.15481	8.76177	8.70381	8.71052	8.62391	8.99828	9.10127	8.93091	8.6101	8.75679	8.92232	8.71827	8.59694	8.25971	8.37699	8.40485	8.68311	8.2205	8.68985	9.33174	8.55931	8.37185	8.68578	8.33329	8.43119	8.83028	8.70677	8.57922	8.31913	8.48191	8.34486	8.48393	8.83487	8.31531
BARHL1	4.3288	1.82785	3.63541	3.76422	3.65112	4.08377	3.13596	2.73722	1.9787	3.27141	3.20051	2.73315	2.83637	3.84263	3.30248	3.62862	2.66815	3.24636	3.14905	3.37467	3.74787	1.86593	3.43871	2.87763	2.67024	2.97739	3.09312	3.267	1.95176	2.03802	3.57066	2.91004	1.80124	3.22814	2.85333	3.04214	2.37551	3.40242	4.33396	3.7964	1.51024	3.22016	3.68571	2.89773	1.76935	3.11309	4.11324	3.9064	3.29695
BARX1	1.98379	2.85374	0.976615	3.53117	2.51108	2.2859	3.1267	2.65099	1.20339	2.32848	2.49645	2.5105	1.91072	1.28165	1.03192	2.55522	1.93962	2.59087	3.83106	2.10299	2.23748	3.85744	2.20139	2.33616	6.72155	2.48753	3.00876	1.66059	1.19339	3.46587	2.37574	2.9864	3.72866	1.69206	4.18913	3.63941	2.60354	2.02039	2.01754	2.02943	2.41913	2.03735	2.3906	2.71748	1.13136	2.10197	3.98027	1.19626	2.75092
BARX2	3.01774	1.95908	1.82292	1.93681	2.9686	1.92075	1.87205	3.54939	2.04814	2.31579	2.65436	3.08853	2.57578	2.01773	1.85121	2.01241	1.52767	2.10469	2.02773	2.38299	3.8458	1.84373	2.64192	1.81087	2.76883	3.22993	1.86812	2.17628	1.95053	2.0844	1.93468	2.3697	2.40671	2.68669	3.88583	2.54164	1.55121	2.31849	2.81828	3.01241	1.86484	1.87023	1.76886	1.97541	1.87418	2.01029	2.11758	1.93149	1.93447
BASP1	10.3972	11.9993	11.3944	10.9127	11.7987	10.9217	11.8214	12.3467	11.6816	12.3819	11.5676	12.4376	11.8847	10.613	11.7073	10.9073	10.8913	11.186	12.3355	11.6074	12.3452	12.2012	11.8424	11.1136	11.758	11.393	12.1588	12.1568	10.6387	11.9052	11.1304	12.0464	11.7569	11.4247	12.5542	11.4289	10.2235	11.7569	11.3476	12.4655	12.0092	12.2871	11.7838	11.5803	10.9391	11.5295	11.9343	11.4432	11.1436
BATF	9.89535	10.6791	10.3364	10.0016	12.5566	10.2644	10.9248	11.6033	11.1719	11.6114	11.9018	11.2664	10.3842	10.9436	10.5828	11.2984	10.9789	9.85791	11.4439	10.3875	10.2654	10.591	10.9481	10.5763	10.4808	11.3844	11.0502	11.0351	9.81439	11.161	10.4193	11.0429	10.828	10.3662	10.3351	10.486	9.63919	12.1288	9.98375	11.2722	10.1361	10.9558	10.3804	10.7209	10.0567	11.1321	12.2983	10.9276	10.6866
BATF2	9.67922	8.35857	8.62635	9.89726	11.0021	9.75838	8.69817	7.69716	9.11693	10.8554	8.97616	7.66147	7.9297	9.04655	8.5226	10.7674	9.80623	9.74486	8.83728	8.92043	8.52713	8.17053	8.95571	8.15369	8.80503	8.83671	8.58866	8.67988	9.33685	8.34436	9.23443	8.92562	8.35877	8.41929	8.43337	9.546	10.0679	8.48203	8.56809	8.45833	8.42648	8.41409	8.84381	8.75592	8.9387	9.09953	11.0507	9.69332	9.92985
BATF3	8.91803	9.53378	8.83551	8.59184	10.0943	8.8792	8.89722	10.3279	9.31248	10.6969	10.0799	9.61109	8.39405	9.25809	8.65967	9.38304	9.05495	9.00897	9.61491	9.1373	8.90367	9.01392	9.11323	8.97292	9.16032	9.5978	8.91961	9.22248	8.84742	9.26104	8.48426	8.98919	9.27076	9.26628	8.5842	9.02359	8.70974	10.373	8.53995	9.14967	8.542	8.48483	8.56283	8.6008	9.20839	8.95325	10.2378	9.27982	9.08486
BAX	11.1138	11.7871	11.6135	10.7469	10.8731	11.2374	11.1316	10.6096	10.6577	10.6682	11.5915	10.4497	10.949	10.1837	10.757	11.0505	10.8933	11.4157	10.7107	10.8298	10.7671	11.1084	10.3393	10.4593	11.1043	10.7822	10.7274	11.2536	10.6961	10.715	11.164	11.429	10.958	10.884	10.9827	10.9359	11.3575	11.1732	11.0332	10.3631	10.611	10.8534	10.8949	10.74	10.872	10.861	11.2998	11.5572	11.5608
BAZ1A	8.76621	9.09113	9.32946	8.95042	7.81797	8.89753	9.40723	10.5214	9.49134	9.69807	9.18169	9.76677	9.18349	9.03154	8.97219	9.50929	9.37128	9.01157	9.90556	9.49297	9.33476	9.57212	9.26585	9.42648	8.7727	9.39142	9.06851	9.11302	8.50222	9.05224	8.8474	9.40783	9.619	8.9686	9.2286	8.7798	8.66463	9.92525	9.28074	10.0212	9.33213	9.27791	9.34997	9.14724	8.98559	8.97159	9.79393	9.21041	9.16626
BAZ1B	10.1436	10.3017	10.121	10.1937	9.33064	10.1366	10.2213	10.4442	10.4988	10.4861	10.0141	9.93043	9.84629	9.98679	10.2785	10.2987	10.1584	10.3203	10.3925	10.2369	10.4345	10.1315	10.2765	10.1549	10.3262	10.1624	10.293	10.1737	10.1534	10.4124	10.4099	10.6087	10.2623	10.3268	10.1122	10.5145	10.3811	10.1169	10.3182	9.80936	10.3434	10.359	10.1945	10.0038	10.3139	9.90801	10.1203	10.3776	10.3812
BAZ2A	9.64164	9.07209	9.64169	9.57714	9.48016	9.67255	9.71765	9.98683	9.25328	9.69223	9.22031	9.04541	9.57855	9.51626	9.49188	9.41423	9.50153	9.1452	9.48512	9.20571	9.21129	8.90055	8.84662	9.43219	9.58656	9.51259	9.39562	9.65522	9.73794	9.96118	9.80348	9.41028	9.56629	9.22383	9.15308	9.43917	9.59225	9.81437	9.60646	8.25931	9.12259	9.32904	9.46366	9.37787	9.45143	9.49794	9.40197	9.42296	9.83885
BAZ2B	9.34951	8.51107	9.11758	9.30599	7.33249	8.84282	8.77512	8.41239	8.85443	8.50055	7.65062	9.02591	9.00516	9.02406	9.12944	8.95698	9.34158	8.47758	8.6596	9.01798	8.87843	8.83343	8.7687	9.43664	8.65093	9.01075	8.75103	8.65923	9.02134	8.80761	9.07953	8.93375	8.97452	9.12833	9.07286	8.25006	9.66646	9.27596	8.59582	8.81701	9.06673	9.08597	9.10389	9.00158	8.95685	9.08843	8.37212	8.73941	8.87531
BBOX1	4.2204	5.47023	6.03135	3.16276	4.57066	5.2978	6.75939	6.35981	5.10186	5.44834	7.26014	6.67394	6.81258	4.58889	6.22558	2.00108	3.69376	4.52517	6.55013	5.56719	6.73196	6.68383	6.54311	2.85734	7.21645	4.62967	6.63087	6.14675	4.72202	4.20273	4.93488	4.78693	5.97916	5.33326	7.67275	6.1173	3.20286	1.9179	5.3861	7.80168	6.31724	6.99098	6.47354	6.69648	3.77751	6.31032	4.72682	5.79925	3.64788
BBS1	7.39365	7.07011	6.9533	7.10644	5.33152	7.19115	7.19623	7.25144	7.17705	7.31659	7.17575	7.96731	8.23044	7.4874	7.69881	7.08421	7.03321	7.41667	7.27382	7.44468	7.92859	7.53247	7.46769	6.69262	7.13964	6.83339	7.23503	7.35228	8.0802	7.47941	7.73949	7.19231	7.37175	7.5586	7.72859	7.61599	7.15745	6.51374	7.7277	7.78278	7.80926	7.69516	7.44565	7.57008	7.36012	7.74574	6.32243	7.40836	7.12213
BBS10	8.45388	8.69723	8.26656	8.72845	8.44377	8.02751	8.12836	8.09091	8.78331	7.82786	7.9064	8.36511	7.96159	8.90902	8.47714	8.8627	8.74902	8.13527	7.63066	8.66185	8.37621	8.25865	8.5935	8.48405	8.5041	8.25504	8.14161	8.26579	8.52028	8.64271	8.45031	8.33719	8.49455	8.9018	8.64096	7.94582	8.82447	7.80413	8.41865	8.02586	8.43885	7.95337	8.26586	8.1691	8.66932	8.59256	8.36435	8.88712	8.39085
BBS12	8.08143	7.10699	7.46763	7.27136	5.60934	7.70075	7.5192	8.21931	7.13136	6.91747	6.97752	9.17578	8.67318	7.69939	8.17825	7.7982	7.51897	7.2988	7.45106	7.94218	8.4113	8.46108	7.67605	7.79318	7.04759	6.97291	7.19889	7.57028	8.073	6.85224	7.54814	7.05444	7.69073	7.69048	8.25715	7.69494	7.62746	6.85545	7.58441	8.06574	8.37017	8.06279	7.94158	7.74552	7.93251	8.12754	7.39219	7.32714	7.3186
BBS2	11.1367	10.2047	11.1822	10.6903	9.90597	10.7859	10.6654	10.4295	10.7083	10.3883	10.4405	10.9858	10.9521	10.8607	10.5507	10.7284	11.0385	10.6166	10.5157	11.2012	11.2592	10.9511	10.9902	10.9713	10.7484	10.963	10.721	10.754	10.8874	11.2578	11.342	11.023	10.6001	11.274	11.3597	11.0047	11.3256	10.6604	11.0695	11.0718	10.959	10.9796	11.0054	10.9482	10.9341	10.9795	10.0194	10.8966	10.5293
BBS4	10.6712	10.0129	10.4232	10.3055	8.84455	10.5392	10.3453	9.89545	10.0862	10.0883	10.032	10.9284	10.7069	9.66953	10.2191	9.69796	10.2664	10.0592	9.63536	10.7654	10.9826	10.4159	10.4721	10.1962	10.3987	10.2693	9.63759	10.0135	10.0541	10.4343	10.5456	10.4674	10.278	10.7236	11.0893	10.7528	10.5565	10.3067	9.81134	11.0891	11.1088	10.4932	10.7755	10.244	10.1568	10.4657	9.87076	10.2113	10.0179
BBS5	5.75068	5.36022	5.98705	5.17639	6.90457	5.82734	6.65794	6.90498	5.06616	5.88391	6.1245	7.33178	7.36026	5.44833	6.19886	5.75909	5.767	5.76198	6.51426	6.70701	6.8921	6.79632	6.43987	6.32734	6.03144	5.66823	5.96447	6.24243	6.0612	5.5996	6.17207	5.92629	6.50351	6.35161	7.35899	6.80034	5.68462	5.85818	6.10209	7.30057	7.06164	6.44825	6.22834	6.24654	5.98968	6.36901	5.99148	5.96511	5.47745
BBS7	5.25107	5.61227	5.02675	5.14322	4.67336	5.27883	5.53149	5.84869	5.80926	4.99073	5.06916	5.77097	6.00976	5.52347	5.91828	5.6937	5.65004	5.31265	5.35553	5.42305	5.7452	5.68019	5.12084	5.47622	5.01117	5.66129	5.30233	5.26657	5.83207	5.16408	5.59752	5.39255	5.707	4.7327	5.58744	4.92965	6.09765	5.09274	5.92169	5.63322	5.86983	5.17256	5.45099	4.96782	5.37937	6.26827	6.11935	5.83287	5.66768
BBS9	9.24218	9.04057	9.27826	9.08227	9.13739	8.90107	9.47631	9.53396	9.02082	9.17564	9.25672	10.2458	9.28239	9.20647	9.41563	9.12447	9.0247	8.91595	9.22225	9.50796	10.0058	9.52068	9.35723	9.37081	9.2218	8.82041	9.10196	9.11664	9.23334	8.97873	9.40421	9.15819	9.51949	9.6946	9.95128	9.42215	9.15834	8.95251	9.25712	10.1298	9.97516	9.68623	9.56228	9.48023	9.2837	9.28392	8.85322	9.23019	9.11055
BBX	11.289	11.1164	11.0693	11.3109	11.4233	11.1306	11.0142	10.8275	11.2248	10.9751	10.8525	11.2608	11.2998	10.8741	10.772	10.3157	11.6049	10.8116	10.8525	11.2269	11.1909	10.9789	11.3142	11.1567	11.2748	11.0987	11.3042	11.0872	10.7596	11.5459	11.0966	11.2514	11.1688	11.516	11.2594	11.5967	11.6907	11.0594	11.6998	10.8816	11.2186	11.0211	11.1671	11.0567	11.0914	10.935	10.8167	11.0347	11.1928
BCAN	2.31812	2.34728	2.21545	2.1278	2.89466	2.1012	2.08663	2.14401	2.13742	2.20261	2.16668	1.95363	2.81912	2.52906	2.04002	2.14692	1.96869	2.55561	2.1606	1.99162	1.99877	2.25978	2.05307	2.17666	2.21274	2.13769	2.01507	2.17643	2.15516	2.04078	2.32083	1.99911	2.06522	2.11601	3.53971	2.13375	1.85371	2.00199	2.00038	2.00709	2.32342	1.96983	2.10553	2.15756	2.07776	2.18631	2.25319	2.13578	2.14755
BCAP31	13.3734	13.5358	13.7155	13.6154	13.0591	13.5108	13.5673	13.3735	13.5352	13.6986	13.7609	13.262	13.5548	13.4807	13.5192	13.6683	13.4969	13.7716	13.8965	13.4634	13.5656	14.0142	13.2901	12.9723	13.4499	13.8719	13.2331	13.4333	13.5694	13.1333	13.4834	13.3707	13.4546	13.6429	13.6764	13.663	13.4691	13.4933	13.498	13.7061	13.474	13.8265	13.6691	13.628	13.5088	13.4704	13.5137	13.6056	13.4927
BCAR3	9.74553	9.52039	9.39486	9.6321	9.41619	9.77413	9.22413	9.29364	9.49979	10.0933	9.76933	10.009	9.56246	9.67424	9.5663	9.5094	9.59829	10.0905	8.68769	9.52527	9.64247	9.11644	9.3714	10.0083	9.46574	9.42429	9.42283	9.35499	9.7057	9.93838	9.58179	9.60869	9.53257	9.91089	9.76741	9.77245	9.73149	9.21012	10.0865	9.84228	9.64808	9.43925	9.47353	9.74964	9.90068	9.40062	9.36604	9.48346	9.84881
BCAS1	5.77342	5.29401	7.3583	6.46623	8.39114	5.46749	8.19528	7.57013	5.50973	6.53552	5.83234	8.88626	8.49582	5.64791	7.38669	4.48189	4.4979	5.68021	6.47556	7.75756	9.23994	7.79688	7.99466	6.33335	7.20104	5.24759	6.93966	7.29929	7.16624	3.48516	6.89651	6.53918	6.75111	6.65387	9.21238	8.15303	6.99076	5.17974	7.62685	9.13106	8.04809	7.98017	7.80786	7.01702	6.38585	7.07643	5.86997	6.8081	5.58609
BCAS2	10.258	10.2165	10.5357	10.2215	8.8903	10.5163	10.2576	10.4172	10.3319	10.3514	10.0088	10.6937	10.5551	10.534	10.4561	10.2478	10.2473	10.393	10.2599	10.4504	10.2823	10.4528	10.1898	10.6249	9.93229	10.1289	10.6442	10.2195	10.1859	10.1488	10.0559	9.95577	10.2168	10.4385	10.3019	9.62752	10.3956	10.0001	10.3276	10.5782	10.3826	10.4256	10.2224	10.696	10.5076	10.5053	10.2361	10.2287	10.251
BCAS3	7.45401	7.10255	6.99414	7.79224	6.56334	7.77869	7.04477	7.51682	6.9899	7.7638	7.7701	8.00195	7.89915	7.14839	7.73077	6.99402	7.4397	7.44136	7.44747	7.5489	7.79072	7.46602	7.46373	6.88153	7.47804	6.83575	7.08304	7.30346	7.53484	6.85731	7.4006	7.08622	7.36658	7.46113	8.05046	8.01466	7.58137	7.08535	7.66364	7.93666	7.51389	7.51713	7.47292	7.32324	7.42498	6.89994	6.64678	7.0443	7.59289
BCAS4	5.80804	5.7383	6.39062	5.43853	6.45863	5.89853	5.95964	5.8288	5.91237	5.5046	5.90345	5.87422	6.83574	4.85251	5.89463	5.81506	5.0273	5.66445	6.07069	5.75901	6.36747	6.08806	6.09092	4.56193	5.83304	5.67168	5.90775	6.42312	5.50323	6.34458	5.99604	6.45614	6.08905	5.28851	6.70142	6.20297	5.17601	6.36295	5.58025	6.73921	6.44435	6.81903	6.19629	5.91165	5.78614	5.69139	4.86338	6.22594	5.89545
BCAT1	5.51974	7.10126	6.56834	4.95688	4.97816	6.86454	6.5498	6.76307	6.48341	6.29448	7.04895	5.81473	6.23739	6.89063	5.75012	7.23879	7.04153	6.90964	6.88941	6.20699	6.19756	8.20698	5.66053	7.4379	6.17144	6.69005	6.00846	6.09129	6.10816	6.1156	5.84582	5.91287	6.1569	5.93452	6.32565	5.31658	6.1813	6.5407	6.15806	3.74982	5.45005	6.35526	6.55111	6.34841	4.96931	6.75952	7.31762	6.02456	6.26814
BCAT2	10.1961	10.2558	10.0267	9.77408	10.9263	10.0323	10.1248	9.74231	9.85825	9.90701	10.564	9.55373	10.5114	10.1743	9.91877	10.3907	9.75427	10.2657	10.152	9.72524	9.66785	9.86035	9.86977	10.1606	9.82986	9.84039	9.98789	10.1538	10.2549	9.86237	10.0211	9.67622	9.80865	9.92786	9.88226	9.88287	9.92028	9.5639	10.5667	9.59849	9.89047	9.72573	9.56806	10.5806	9.9697	10.0809	10.0781	9.58223	9.6311
BCCIP	7.01921	6.65045	5.94177	6.76029	5.69067	6.67364	6.29704	7.24427	6.51228	7.47876	6.17309	7.33199	6.74765	6.17858	6.71714	7.11603	6.52379	6.18505	6.48761	6.79543	6.86633	6.48501	6.81572	6.65713	6.47693	6.41314	6.53981	6.05141	6.5062	7.25404	6.41097	6.35711	6.54302	5.96584	6.77995	6.18763	6.47968	6.2197	6.8941	7.28269	6.78848	6.45321	6.98459	6.35222	6.83001	6.51478	6.5	7.35677	6.85015
BCDIN3D	9.70033	9.48672	9.58425	9.4034	8.92954	9.62536	9.6727	9.34384	9.64445	9.5384	9.28365	9.80773	9.59456	9.31763	9.44057	9.4846	9.60255	9.38873	9.32883	9.64817	9.57411	9.35348	9.71759	9.30609	9.60043	9.48207	9.51616	9.33443	9.52952	9.73722	9.7385	9.6545	9.46411	9.52418	9.8935	9.70172	9.9195	9.29722	9.75666	9.98227	10.0791	9.40611	9.72212	9.51463	9.57712	9.95243	9.40964	9.76611	9.5658
BCHE	10.5432	11.3246	9.14752	9.72839	8.32325	10.1791	9.71677	10.2598	11.6939	10.5967	9.52811	10.1765	10.395	11.9414	11.4923	10.7077	10.8722	10.7341	6.63826	10.7294	10.9772	9.93106	11.8552	10.2913	11.2202	11.0296	11.4511	11.3041	10.962	10.9616	10.9317	11.4422	10.5021	11.0064	9.99548	9.76487	11.2185	9.9926	11.0421	8.96424	10.4095	9.35937	11.0322	11.1784	10.5461	11.5319	10.2017	10.6386	10.7168
BCKDHB	6.73958	6.29426	6.48495	6.65015	6.31045	6.36873	6.50912	6.51081	6.22379	6.30757	6.18663	6.24237	6.66525	6.47714	6.9434	6.89959	6.04172	6.6658	6.09901	6.50835	6.62001	6.34526	6.50401	7.02235	6.54047	6.03059	6.48738	6.12551	6.72246	6.85188	6.76268	6.67675	6.56444	6.49983	6.79952	6.27382	6.55368	6.42527	7.05027	6.74879	6.62435	6.36371	6.39691	6.5276	6.55958	6.28512	5.87079	6.52168	6.63558
BCKDK	8.78998	8.96513	8.93188	9.1049	9.80831	8.96539	8.86156	8.95803	8.7216	9.04546	9.37531	8.65785	8.98838	8.57507	8.60225	9.16084	8.59211	9.07034	8.98725	8.95251	8.79441	9.44955	8.98059	8.81781	9.01368	8.92385	9.11487	8.9535	8.76146	8.79373	8.57779	8.95147	9.08033	8.92644	8.897	8.96268	8.5116	8.82215	8.95954	8.55439	8.79056	8.9861	8.77042	8.96596	8.78026	8.47248	9.39071	8.91795	8.91704
BCL11A	7.07442	7.13554	8.15561	6.33863	6.60152	7.15877	8.59012	7.2103	7.6261	6.26276	7.26921	7.486	7.78931	7.57926	7.6397	6.10067	8.03271	6.64938	7.37137	6.94356	7.96434	8.06255	7.95549	7.13111	7.43583	7.85803	7.6896	8.00324	6.48895	8.67336	7.34386	8.08362	7.56167	6.62987	7.74493	6.98901	7.34479	8.29927	7.97331	7.15439	7.65225	7.78849	7.8986	7.62661	6.89933	7.94853	7.86375	6.90976	7.17564
BCL11B	7.98624	7.89684	8.58108	8.2175	6.43015	7.78117	8.60753	7.81353	9.20133	7.84004	7.78474	7.23123	7.23279	7.71242	8.15624	9.01931	10.2795	7.40935	7.90939	8.2071	7.99084	7.38871	8.62258	8.73172	8.22774	8.62101	8.29774	8.54269	7.60317	9.41391	7.99989	9.42195	8.07042	7.40052	8.2502	8.2839	8.27817	10.1358	7.85251	7.86552	8.1702	8.39622	8.23144	8.17264	8.21014	8.62326	9.59113	7.85058	8.52316
BCL2	8.15827	8.47906	8.67525	8.4532	6.91338	8.12533	8.22537	8.70619	8.77182	8.65513	8.43224	8.54326	7.88853	8.79293	8.67308	8.27611	9.58609	8.13386	8.38265	8.40107	8.5698	8.13318	9.08075	9.0208	8.71548	8.5816	9.14986	8.84699	8.76141	10.1692	8.77139	9.09376	8.49165	8.327	8.3361	8.68262	9.02383	9.11002	9.50862	8.05271	8.24359	8.63979	8.90578	8.47402	8.54023	9.34646	8.35041	8.29707	8.66976
BCL2A1	8.74108	8.95811	9.95271	9.98463	9.61515	9.42244	9.58091	9.54222	8.57043	10.2653	9.58714	10.8291	10.2838	9.89862	8.4984	10.0492	8.58226	10.0381	9.19348	9.2533	9.27495	11.4067	7.77683	9.36146	8.08375	10.4675	8.44299	7.96649	9.01097	8.72212	8.03097	8.68616	8.59928	9.10529	9.86474	8.36966	8.8912	10.3051	9.27118	8.80485	8.96834	10.1708	9.72956	9.75567	9.02452	9.73315	10.1918	9.56091	8.94223
BCL2L1	7.67469	8.27758	8.18746	8.11797	8.48349	8.22874	7.84116	8.49259	8.19599	8.93095	8.99437	8.27765	8.15459	7.71321	8.17507	8.46166	8.0411	8.33523	8.0809	8.21023	8.16267	8.15869	7.91215	7.59724	7.63744	7.22314	7.98412	8.26832	7.92054	7.38374	7.68364	8.36579	8.08829	7.71822	8.23511	8.16221	7.18578	8.06756	8.62301	8.67652	7.99644	8.26849	8.00307	8.13765	8.06873	7.5267	8.19974	8.18485	8.11786
BCL2L10	2.79665	2.51084	2.70934	2.02449	4.09028	1.96176	4.14387	3.83584	2.14476	2.95039	2.92895	4.22942	3.64765	2.15083	3.6515	2.07994	2.69116	2.44518	2.58255	3.33937	4.1843	3.30351	3.06407	1.8262	3.77252	1.78228	5.1373	4.509	2.0569	3.34248	2.07079	3.36178	4.12479	2.57484	3.52185	2.47705	2.07523	2.13641	3.84546	3.96607	2.65881	3.90863	3.54467	3.56893	1.91137	3.06676	2.3281	2.52556	1.94963
BCL2L11	10.2701	11.0814	10.7121	10.1006	8.17317	10.6417	10.7902	11.1449	10.4535	10.7701	10.6841	10.6115	10.5418	11.0154	10.5754	11.5509	11.0412	10.0832	11.0417	10.5742	10.2662	10.1892	10.8112	11.2933	10.7398	10.5211	10.6809	10.9371	10.6982	10.6915	10.4618	11.1262	10.7148	10.68	10.3662	10.2964	10.5426	10.8787	10.57	11.142	10.4169	10.8119	10.54	10.791	10.6574	10.8222	10.7701	11.1928	10.4301
BCL2L13	5.63773	5.44836	5.98474	5.86308	4.49093	5.3937	5.3634	5.20496	4.82887	5.85297	5.6395	4.65415	5.40524	5.0861	5.64856	6.00513	5.84566	5.70152	3.97931	5.58167	5.39768	5.62338	5.2313	4.93385	5.54882	5.19901	5.42336	5.48829	4.87493	5.41797	5.60369	5.96198	5.36232	5.41916	5.85564	5.39586	5.73968	5.32147	5.59094	5.60724	5.95771	5.84346	5.36461	5.38195	5.56487	4.31635	5.303	5.17757	5.79017
BCL2L14	3.07733	2.15008	2.3461	1.98792	1.85483	3.00768	2.38771	2.59082	2.02276	2.23015	2.56663	3.81128	3.3465	2.18712	2.50806	2.27011	2.35804	2.69065	2.50347	2.90295	2.91096	3.81246	3.43151	2.13116	1.96298	1.99297	2.48766	3.59924	2.096	2.99588	2.96126	2.38003	3.20059	1.97141	2.34725	2.0419	2.49273	2.45913	2.45253	2.48002	2.14977	3.29811	1.97075	4.04052	2.36857	3.47465	3.03703	2.74979	2.41029
BCL2L2	11.4825	11.3603	10.7559	11.4562	9.87927	10.7749	11.0371	11.1432	11.3426	11.2972	11.2627	11.4387	11.188	11.1242	11.26	10.9955	10.9165	10.9412	10.7958	11.5327	11.2524	10.7537	11.344	11.1443	11.3911	10.9998	11.056	11.162	11.257	10.9595	11.7043	11.3245	11.3587	11.4993	11.2282	11.5123	11.542	10.7356	11.1783	11.2344	11.0692	10.953	11.1538	10.9616	11.3342	11.1707	10.8472	11.0254	11.4143
BCL6	10.7071	12.1824	11.4169	10.9694	9.56954	11.1665	12.0573	13.1063	11.9665	12.4192	12.1519	13.4064	12.2587	11.9511	11.8611	11.4058	11.7094	10.8002	12.1446	11.6719	11.9021	11.7738	11.6695	12.0427	11.5076	11.16	12.0067	11.5249	10.7617	11.8628	11.7119	11.8169	11.9638	11.8348	11.7829	11.2528	10.9645	12.3029	11.0291	11.3852	11.8853	11.8571	11.4688	11.4473	11.413	11.7842	11.6563	12.5788	11.0084
BCL6B	9.94723	9.17053	8.04858	10.153	10.3205	8.85159	8.52633	9.49704	7.87537	9.6457	9.38821	8.69194	8.84619	9.25061	8.73924	8.18288	9.27807	9.14818	9.02888	8.59061	8.74113	7.79146	8.43333	8.80678	9.53647	9.61859	9.01234	8.10978	9.30861	8.11518	9.05865	8.53515	9.30585	8.83924	8.45334	9.31368	9.71004	9.26617	8.31161	8.21212	7.77862	9.23371	8.46939	8.22257	9.29339	8.02664	8.42368	8.83979	9.88106
BCL7A	8.15208	8.34042	8.35086	7.5281	8.33009	8.05429	8.57291	8.52099	8.42473	8.87492	8.38885	8.80932	9.40191	8.28725	8.5758	7.64252	7.66361	8.49647	8.74359	8.32237	8.89375	8.7663	8.28519	8.47666	7.90996	7.80525	8.13807	8.37571	8.78336	7.36522	8.6012	8.12448	8.53101	8.55731	8.94891	8.97097	7.96637	7.95543	8.77412	8.8227	8.78533	8.48495	8.64119	8.40624	8.49369	8.61268	7.23119	8.65914	8.02811
BCL7B	9.09121	8.98178	9.26078	9.40568	8.1751	9.38458	9.1416	9.53851	8.38781	9.7906	9.51662	9.22112	8.92728	9.80545	9.32557	9.00062	8.75131	9.5209	8.88782	8.93391	8.85586	8.99841	8.81804	9.36989	8.76842	8.89998	9.14896	9.27511	9.65887	9.01554	8.83038	8.9424	8.80771	8.67871	8.80309	9.09526	9.12326	9.14435	8.99085	8.87184	8.79215	8.81026	8.72282	9.23888	9.64582	9.26421	8.77629	9.19422	9.0338
BCL7C	8.88289	9.37662	9.15256	9.07898	10.3671	9.0931	9.03748	8.01586	9.11333	8.85634	9.54959	8.33059	8.60069	9.10199	9.00696	9.0108	8.87473	9.15734	8.6598	8.78166	9.09478	9.11412	9.13821	8.96095	9.28713	9.25149	9.0931	9.02666	9.21429	9.57331	9.44881	9.37662	8.97715	9.1679	8.78255	9.41463	8.92352	8.93703	8.87914	8.88056	8.70189	8.72892	9.04012	9.10426	9.2863	8.91071	9.06485	9.21655	9.27496
BCL9	6.06676	5.98459	6.16564	5.39833	6.67257	5.71965	6.47227	6.30261	6.03207	5.6069	6.38229	6.28281	6.50116	5.9152	6.3514	4.86125	5.52039	5.72024	5.97539	6.06054	6.49027	6.15172	6.34318	5.95519	6.65146	5.95571	6.14555	6.30781	6.06996	6.47227	6.29271	6.05117	6.42588	6.18104	6.19583	6.68342	5.58424	5.24875	6.10861	6.62829	6.33837	5.86996	6.25113	6.11235	5.80203	5.60328	6.43378	6.19093	5.98568
BCL9L	7.84867	8.23525	7.56227	7.49636	8.14344	7.94739	7.54707	7.77109	8.01707	8.07997	8.40519	7.56094	7.79383	7.47928	8.14522	8.20713	7.71933	8.22388	7.79549	7.99353	7.73266	7.4749	7.62359	7.29173	8.24531	7.41288	7.85485	7.96725	8.04081	8.12425	8.05413	8.30599	8.09263	7.67367	7.8482	8.17851	7.46731	7.32818	7.84701	7.78074	8.05818	7.76558	7.90745	7.7257	7.6598	7.43101	8.1582	7.78151	8.21035
BCLAF1	11.147	10.9738	11.2827	10.9518	8.22103	11.0934	11.2052	11.285	11.0998	11.0981	10.6769	11.603	10.9419	10.6131	10.0262	10.4866	11.4939	10.2647	10.9861	11.1683	11.1856	10.9197	10.9438	10.9119	10.9746	11.5054	10.4971	10.41	9.7359	11.1919	11.0911	11.5323	10.9514	11.3149	11.347	11.4565	11.2666	11.6546	11.0343	11.7399	11.5586	10.7929	11.1249	10.4596	10.6522	11.0506	11.2429	11.3651	11.0632
BCMO1	3.88646	4.05761	3.56661	3.2903	4.9187	3.04736	4.28019	3.0979	2.98029	3.7161	3.48399	3.9572	4.40789	2.79938	3.59805	4.19295	3.55144	3.29437	4.35799	3.49332	3.88596	3.04997	3.62378	3.38276	3.95569	3.42132	3.82887	3.95667	3.70332	3.80955	3.98553	4.2729	3.37024	3.6884	3.45845	4.59138	3.7243	4.21559	4.25067	5.0545	3.63918	3.55704	3.9741	3.90881	3.79764	3.33376	3.37432	4.08908	3.89786
BCOR	8.93566	8.66316	9.54297	8.32709	7.99902	9.39964	8.771	8.41159	8.74219	8.69067	8.97098	8.67416	8.74957	9.03587	8.81349	8.13522	9.27042	8.61656	7.94819	8.54448	8.39675	8.5299	8.66729	8.47033	8.74638	8.50683	8.8049	8.75672	9.18138	10.0121	8.43979	8.63239	8.71168	9.30861	8.55068	9.15583	9.75274	8.35369	8.7531	8.87996	8.73249	8.18073	8.75901	9.42312	8.88055	8.77572	8.6974	8.23388	8.98926
BCORL1	8.13727	8.92095	8.11029	8.38881	8.2947	8.07984	8.44813	8.78438	8.31323	8.2391	8.53948	8.52818	8.54851	8.78756	8.07855	8.01695	8.03375	7.8228	7.94227	8.10014	8.13953	7.90488	8.30039	8.69346	8.71589	8.25139	8.42819	8.35221	8.47303	8.7939	8.24291	7.94088	8.11495	8.27693	8.12289	8.62479	8.281	7.72387	8.3554	7.90769	7.76682	8.24112	8.13133	8.33525	8.50477	8.59801	8.11158	8.23348	8.21642
BCR	8.73593	8.6973	8.41209	9.11678	8.99275	8.79114	8.49446	8.63543	8.53405	9.15921	8.36213	8.86408	8.42976	8.7748	8.49911	8.66838	8.54268	9.11144	8.91709	8.6204	8.85597	7.81462	8.34454	8.45047	8.49846	7.91416	8.32732	8.4445	8.71076	8.1	8.31311	8.53645	8.46164	8.15859	8.27684	8.54853	8.87219	8.20407	9.32286	8.53945	8.37653	8.45414	8.34371	8.27777	8.82395	7.77303	7.84225	8.531	8.78835
[truncated: 11,307 more rows]
[truncated: 3 more columns]

## Sheet: DEGs of IPF
geneNames	logFC	AveExpr	t	P.Value	adj.P.Val	B
CSF3	-2.26075	5.00314	-4.19943	0.000103275	0.261918	0.826711
GADD45B	-0.760656	12.5398	-4.19041	0.000106401	0.261918	0.803718
C8orf4	-0.600487	10.489	-3.9767	0.000213854	0.34699	0.265457
TMEM2	-0.615189	11.0964	-3.95596	0.000228651	0.34699	0.213867
NUAK1	0.621941	11.4047	3.85601	0.000314938	0.34699	-0.0329969
[truncated: 103 more rows]

## Sheet: GO of DEGs
Category	ID	Term	Genes	adj_pval
[truncated: 258 more rows]

[truncated: 1 more sheets: KEGG of DEGs]
